# Supplementary material
Source: publisher figshare collection journal article supplement (https://acs.figshare.com/ndownloader/files/5694678)
Supplement: Supplementary file 1 [file 5694678]

# ic0205482.cif

data_BOSi2_compound_1
 
_audit_creation_method            SHELXL
_chemical_name_systematic
;
  ?
;
_chemical_name_common             ?
_chemical_formula_moiety          'C28 H63 B O9 Si2'
_chemical_formula_structural      ?
_chemical_formula_analytical      ?
_chemical_formula_sum             'C28 H63 B O9 Si2'
_chemical_formula_weight          610.77
_chemical_melting_point           ?
_chemical_compound_source         ?
 
loop_
  _atom_type_symbol
  _atom_type_description
  _atom_type_scat_dispersion_real
  _atom_type_scat_dispersion_imag
  _atom_type_scat_source
  'C'  'C'   0.0033   0.0016
  'International Tables Vol C Tables 4.2.6.8 and 6.1.1.4'
  'H'  'H'   0.0000   0.0000
  'International Tables Vol C Tables 4.2.6.8 and 6.1.1.4'
  'B'  'B'   0.0013   0.0007
  'International Tables Vol C Tables 4.2.6.8 and 6.1.1.4'
  'O'  'O'   0.0106   0.0060
  'International Tables Vol C Tables 4.2.6.8 and 6.1.1.4'
  'Si'  'Si'   0.0817   0.0704
  'International Tables Vol C Tables 4.2.6.8 and 6.1.1.4'
 
_symmetry_cell_setting            Triclinic
_symmetry_space_group_name_H-M    'P -1'
 
loop_
  _symmetry_equiv_pos_as_xyz
  'x, y, z'
  '-x, -y, -z'
 
_cell_length_a                    9.4639(5)
_cell_length_b                    11.8965(4)
_cell_length_c                    17.8225(11)
_cell_angle_alpha                 93.089(3)
_cell_angle_beta                  101.8720(10)
_cell_angle_gamma                 101.340(3)
_cell_volume                      1916.0(2)
_cell_formula_units_Z             2
_cell_measurement_temperature     159(2)
_cell_measurement_reflns_used     2530
_cell_measurement_theta_min       1.75
_cell_measurement_theta_max       23.0
 
_exptl_crystal_description        plate
_exptl_crystal_colour             colorless
_exptl_crystal_size_max           0.30
_exptl_crystal_size_mid           0.19
_exptl_crystal_size_min           0.08
_exptl_crystal_density_meas       ?
_exptl_crystal_density_diffrn     1.059
_exptl_crystal_density_method     'not measured'
_exptl_crystal_F_000              672
_exptl_absorpt_coefficient_mu     0.134
_exptl_absorpt_correction_type    empirical
_exptl_absorpt_correction_T_min   0.333
_exptl_absorpt_correction_T_max   0.962
_exptl_absorpt_process_details    'Blessing, 1995'

_exptl_special_details
;
  ?
;
 
_diffrn_ambient_temperature       159(2)
_diffrn_radiation_wavelength      0.71073
_diffrn_radiation_type            MoK\a
_diffrn_radiation_source          'fine-focus sealed tube'
_diffrn_radiation_monochromator   graphite
_diffrn_measurement_device        'SMART CCD'
_diffrn_measurement_method        \w-scans
_diffrn_standards_number          ?
_diffrn_standards_interval_count  ?
_diffrn_standards_interval_time   ?
_diffrn_standards_decay_%         ?
_diffrn_reflns_number             8698
_diffrn_reflns_av_R_equivalents   0.0469
_diffrn_reflns_av_sigmaI/netI     0.0901
_diffrn_reflns_limit_h_min        -10
_diffrn_reflns_limit_h_max        11
_diffrn_reflns_limit_k_min        -14
_diffrn_reflns_limit_k_max        8
_diffrn_reflns_limit_l_min        -21
_diffrn_reflns_limit_l_max        21
_diffrn_reflns_theta_min          1.75
_diffrn_reflns_theta_max          22.99
_reflns_number_total              5239
_reflns_number_observed           3089
_reflns_observed_criterion        >2sigma(I)
 
_computing_data_collection        'Bruker SMART'
_computing_cell_refinement        'Bruker SAINT'
_computing_data_reduction         'Bruker SAINT'
_computing_structure_solution     'SHELXTL-XS (Bruker, 1995)'
_computing_structure_refinement   'SHELXTL-XL (Bruker, 1995)'
_computing_molecular_graphics     'SHELXTL-XP'(Bruker, 1995)'
_computing_publication_material   ?
 
_refine_special_details
;
  Refinement on F^2^ for ALL reflections except for 86 with very negative F^2^
  or flagged by the user for potential systematic errors.  Weighted R-factors
  wR and all goodnesses of fit S are based on F^2^, conventional R-factors R
  are based on F, with F set to zero for negative F^2^. The observed criterion
  of F^2^ > 2sigma(F^2^) is used only for calculating _R_factor_obs etc. and is
  not relevant to the choice of reflections for refinement.  R-factors based
  on F^2^ are statistically about twice as large as those based on F, and R-
  factors based on ALL data will be even larger.
;
 
_refine_ls_structure_factor_coef  Fsqd
_refine_ls_matrix_type            full
_refine_ls_weighting_scheme
  'calc w=1/[\s^2^(Fo^2^)+(0.1568P)^2^+0.0000P] where P=(Fo^2^+2Fc^2^)/3'
_atom_sites_solution_primary      direct
_atom_sites_solution_secondary    difmap
_atom_sites_solution_hydrogens    geom
_refine_ls_hydrogen_treatment     ?
_refine_ls_extinction_method      none
_refine_ls_extinction_coef        ?
_refine_ls_number_reflns          5153
_refine_ls_number_parameters      351
_refine_ls_number_restraints      0
_refine_ls_R_factor_all           0.1356
_refine_ls_R_factor_obs           0.0825
_refine_ls_wR_factor_all          0.2475
_refine_ls_wR_factor_obs          0.2116
_refine_ls_goodness_of_fit_all    0.983
_refine_ls_goodness_of_fit_obs    1.127
_refine_ls_restrained_S_all       0.999
_refine_ls_restrained_S_obs       1.127
_refine_ls_shift/esd_max          0.000
_refine_ls_shift/esd_mean         0.000
 
loop_
  _atom_site_label
  _atom_site_type_symbol
  _atom_site_fract_x
  _atom_site_fract_y
  _atom_site_fract_z
  _atom_site_U_iso_or_equiv
  _atom_site_thermal_displace_type
  _atom_site_occupancy
  _atom_site_calc_flag
  _atom_site_refinement_flags
  _atom_site_disorder_group
B1 B 0.7940(7) 1.1685(5) 0.2913(4) 0.045(2) Uani 1 d . .
Si1 Si 0.78499(14) 0.93174(11) 0.28510(7) 0.0363(4) Uani 1 d . .
Si2 Si 0.9128(2) 1.30828(12) 0.19010(8) 0.0415(4) Uani 1 d . .
O1 O 0.7785(4) 1.0610(3) 0.3135(2) 0.0528(10) Uani 1 d . .
O2 O 0.8523(4) 1.1939(3) 0.2282(2) 0.0508(10) Uani 1 d . .
O3 O 0.7540(4) 1.2563(3) 0.3283(2) 0.0456(9) Uani 1 d . .
O12 O 0.7163(3) 0.9014(3) 0.1947(2) 0.0461(9) Uani 1 d . .
O13 O 0.6895(4) 0.8465(3) 0.3305(2) 0.0540(10) Uani 1 d . .
O14 O 0.9516(4) 0.9166(4) 0.3053(2) 0.0710(12) Uani 1 d . .
O15 O 1.0158(4) 1.2740(4) 0.1353(2) 0.0716(12) Uani 1 d . .
O16 O 1.0068(4) 1.4070(3) 0.2560(2) 0.0685(12) Uani 1 d . .
O17 O 0.7788(5) 1.3520(3) 0.1391(2) 0.0721(13) Uani 1 d . .
C1 C 0.6913(6) 1.2515(4) 0.3954(3) 0.0517(14) Uani 1 d . .
C2 C 0.5673(5) 0.8810(5) 0.1468(3) 0.0452(13) Uani 1 d . .
C3 C 0.7135(6) 0.8014(4) 0.4041(3) 0.0438(13) Uani 1 d . .
C4 C 1.0691(5) 0.9105(4) 0.2685(3) 0.0456(13) Uani 1 d . .
C5 C 0.9978(7) 1.2396(5) 0.0563(3) 0.0548(15) Uani 1 d . .
C6 C 1.1490(6) 1.4435(6) 0.2999(4) 0.077(2) Uani 1 d . .
C7 C 0.6740(8) 1.4184(6) 0.1469(3) 0.070(2) Uani 1 d . .
C10 C 0.8033(8) 1.2276(5) 0.4642(3) 0.083(2) Uani 1 d . .
H10A H 0.8227(8) 1.1524(5) 0.4549(3) 0.124 Uiso 1 calc R .
H10B H 0.7641(8) 1.2308(5) 0.5097(3) 0.124 Uiso 1 calc R .
H10C H 0.8935(8) 1.2844(5) 0.4713(3) 0.124 Uiso 1 calc R .
C11 C 0.6610(7) 1.3691(5) 0.4099(3) 0.067(2) Uani 1 d . .
H11A H 0.5905(7) 1.3842(5) 0.3666(3) 0.100 Uiso 1 calc R .
H11B H 0.7511(7) 1.4260(5) 0.4170(3) 0.100 Uiso 1 calc R .
H11C H 0.6218(7) 1.3724(5) 0.4554(3) 0.100 Uiso 1 calc R .
C12 C 0.5474(7) 1.1599(5) 0.3796(4) 0.079(2) Uani 1 d . .
H12A H 0.5683(7) 1.0852(5) 0.3704(4) 0.119 Uiso 1 calc R .
H12B H 0.4805(7) 1.1759(5) 0.3351(4) 0.119 Uiso 1 calc R .
H12C H 0.5030(7) 1.1612(5) 0.4234(4) 0.119 Uiso 1 calc R .
C20 C 0.4986(7) 0.9807(6) 0.1612(4) 0.087(2) Uani 1 d . .
H20A H 0.4980(7) 0.9910(6) 0.2149(4) 0.130 Uiso 1 calc R .
H20B H 0.3990(7) 0.9658(6) 0.1312(4) 0.130 Uiso 1 calc R .
H20C H 0.5546(7) 1.0492(6) 0.1467(4) 0.130 Uiso 1 calc R .
C21 C 0.5850(17) 0.9021(13) 0.0653(8) 0.082(5) Uiso 0.50 d P .
H21A H 0.6292(17) 0.8440(13) 0.0459(8) 0.122 Uiso 0.50 calc PR .
H21B H 0.6470(17) 0.9767(13) 0.0661(8) 0.122 Uiso 0.50 calc PR .
H21C H 0.4898(17) 0.8991(13) 0.0326(8) 0.122 Uiso 0.50 calc PR .
C21A C 0.5817(11) 0.8464(9) 0.0666(5) 0.034(2) Uiso 0.50 d P .
H21D H 0.6279(11) 0.7813(9) 0.0674(5) 0.051 Uiso 0.50 calc PR .
H21E H 0.6411(11) 0.9096(9) 0.0483(5) 0.051 Uiso 0.50 calc PR .
H21F H 0.4854(11) 0.8262(9) 0.0329(5) 0.051 Uiso 0.50 calc PR .
C22 C 0.4735(8) 0.7711(6) 0.1651(4) 0.090(2) Uani 1 d . .
H22A H 0.5177(8) 0.7072(6) 0.1558(4) 0.136 Uiso 1 calc R .
H22B H 0.3760(8) 0.7583(6) 0.1328(4) 0.136 Uiso 1 calc R .
H22C H 0.4675(8) 0.7785(6) 0.2182(4) 0.136 Uiso 1 calc R .
C30 C 0.5667(14) 0.7294(11) 0.4125(7) 0.062(3) Uiso 0.50 d P .
H30A H 0.5022(14) 0.7794(11) 0.4212(7) 0.093 Uiso 0.50 calc PR .
H30B H 0.5834(14) 0.6845(11) 0.4554(7) 0.093 Uiso 0.50 calc PR .
H30C H 0.5220(14) 0.6790(11) 0.3663(7) 0.093 Uiso 0.50 calc PR .
C30A C 0.5550(17) 0.7877(14) 0.4232(9) 0.089(5) Uiso 0.50 d P .
H30D H 0.5323(17) 0.8624(14) 0.4296(9) 0.133 Uiso 0.50 calc PR .
H30E H 0.5543(17) 0.7512(14) 0.4699(9) 0.133 Uiso 0.50 calc PR .
H30F H 0.4824(17) 0.7414(14) 0.3817(9) 0.133 Uiso 0.50 calc PR .
C31 C 0.7516(18) 0.6923(12) 0.3942(9) 0.076(5) Uiso 0.50 d P .
H31A H 0.6827(18) 0.6465(12) 0.3511(9) 0.114 Uiso 0.50 calc PR .
H31B H 0.7483(18) 0.6537(12) 0.4399(9) 0.114 Uiso 0.50 calc PR .
H31C H 0.8496(18) 0.7034(12) 0.3848(9) 0.114 Uiso 0.50 calc PR .
C31A C 0.8217(16) 0.7130(11) 0.4032(7) 0.054(3) Uiso 0.50 d P .
H31D H 0.9226(16) 0.7546(11) 0.4176(7) 0.081 Uiso 0.50 calc PR .
H31E H 0.8031(16) 0.6743(11) 0.3523(7) 0.081 Uiso 0.50 calc PR .
H31F H 0.8041(16) 0.6572(11) 0.4390(7) 0.081 Uiso 0.50 calc PR .
C32 C 0.8011(9) 0.8897(5) 0.4665(3) 0.094(2) Uani 1 d . .
H32A H 0.7592(9) 0.9571(5) 0.4642(3) 0.141 Uiso 1 calc R .
H32B H 0.9011(9) 0.9097(5) 0.4603(3) 0.141 Uiso 1 calc R .
H32C H 0.7999(9) 0.8599(5) 0.5154(3) 0.141 Uiso 1 calc R .
C40 C 1.0096(14) 0.7820(10) 0.2297(7) 0.064(3) Uiso 0.50 d P .
H40A H 0.9831(14) 0.7326(10) 0.2677(7) 0.096 Uiso 0.50 calc PR .
H40B H 1.0853(14) 0.7570(10) 0.2088(7) 0.096 Uiso 0.50 calc PR .
H40C H 0.9243(14) 0.7788(10) 0.1891(7) 0.096 Uiso 0.50 calc PR .
C40A C 1.0437(17) 0.8480(13) 0.1966(8) 0.087(4) Uiso 0.50 d P .
H40D H 0.9566(17) 0.8629(13) 0.1638(8) 0.131 Uiso 0.50 calc PR .
H40E H 1.0300(17) 0.7672(13) 0.2028(8) 0.131 Uiso 0.50 calc PR .
H40F H 1.1269(17) 0.8711(13) 0.1737(8) 0.131 Uiso 0.50 calc PR .
C41 C 1.1989(7) 0.8991(7) 0.3275(4) 0.089(2) Uani 1 d . .
H41A H 1.2038(7) 0.9460(7) 0.3739(4) 0.134 Uiso 1 calc R .
H41B H 1.2871(7) 0.9239(7) 0.3089(4) 0.134 Uiso 1 calc R .
H41C H 1.1901(7) 0.8201(7) 0.3380(4) 0.134 Uiso 1 calc R .
C42 C 1.0852(14) 0.9837(10) 0.2029(7) 0.065(3) Uiso 0.50 d P .
H42A H 1.1111(14) 1.0636(10) 0.2223(7) 0.097 Uiso 0.50 calc PR .
H42B H 0.9934(14) 0.9689(10) 0.1653(7) 0.097 Uiso 0.50 calc PR .
H42C H 1.1614(14) 0.9650(10) 0.1794(7) 0.097 Uiso 0.50 calc PR .
C42A C 1.1232(16) 1.0422(11) 0.2615(8) 0.081(4) Uiso 0.50 d P .
H42D H 1.1405(16) 1.0846(11) 0.3110(8) 0.121 Uiso 0.50 calc PR .
H42E H 1.0490(16) 1.0686(11) 0.2258(8) 0.121 Uiso 0.50 calc PR .
H42F H 1.2132(16) 1.0538(11) 0.2433(8) 0.121 Uiso 0.50 calc PR .
C50 C 0.8610(8) 1.1429(7) 0.0339(4) 0.112(3) Uani 1 d . .
H50A H 0.8741(8) 1.0806(7) 0.0649(4) 0.168 Uiso 1 calc R .
H50B H 0.8460(8) 1.1161(7) -0.0195(4) 0.168 Uiso 1 calc R .
H50C H 0.7765(8) 1.1710(7) 0.0422(4) 0.168 Uiso 1 calc R .
C51 C 1.1290(7) 1.1911(7) 0.0474(4) 0.092(2) Uani 1 d . .
H51A H 1.1183(7) 1.1151(7) 0.0642(4) 0.139 Uiso 1 calc R .
H51B H 1.2173(7) 1.2398(7) 0.0781(4) 0.139 Uiso 1 calc R .
H51C H 1.1352(7) 1.1874(7) -0.0057(4) 0.139 Uiso 1 calc R .
C52 C 0.9479(17) 1.3222(11) 0.0010(7) 0.071(4) Uiso 0.50 d P .
H52A H 0.8506(17) 1.2888(11) -0.0289(7) 0.106 Uiso 0.50 calc PR .
H52B H 1.0151(17) 1.3377(11) -0.0327(7) 0.106 Uiso 0.50 calc PR .
H52C H 0.9462(17) 1.3928(11) 0.0292(7) 0.106 Uiso 0.50 calc PR .
C52A C 1.0371(26) 1.3542(18) 0.0278(13) 0.157(9) Uiso 0.50 d P .
H52D H 0.9608(26) 1.3960(18) 0.0303(13) 0.235 Uiso 0.50 calc PR .
H52E H 1.0468(26) 1.3441(18) -0.0246(13) 0.235 Uiso 0.50 calc PR .
H52F H 1.1290(26) 1.3966(18) 0.0593(13) 0.235 Uiso 0.50 calc PR .
C60 C 1.2375(24) 1.3675(18) 0.3086(12) 0.139(7) Uiso 0.50 d P .
H60A H 1.1949(24) 1.3042(18) 0.3337(12) 0.208 Uiso 0.50 calc PR .
H60B H 1.3328(24) 1.4045(18) 0.3394(12) 0.208 Uiso 0.50 calc PR .
H60C H 1.2482(24) 1.3395(18) 0.2590(12) 0.208 Uiso 0.50 calc PR .
C60A C 1.1797(16) 1.3201(11) 0.3352(8) 0.071(4) Uiso 0.50 d P .
H60D H 1.1020(16) 1.2889(11) 0.3602(8) 0.106 Uiso 0.50 calc PR .
H60E H 1.2727(16) 1.3353(11) 0.3718(8) 0.106 Uiso 0.50 calc PR .
H60F H 1.1819(16) 1.2658(11) 0.2938(8) 0.106 Uiso 0.50 calc PR .
C61 C 1.2673(18) 1.4870(13) 0.2690(9) 0.090(4) Uiso 0.50 d P .
H61A H 1.2559(18) 1.5592(13) 0.2496(9) 0.135 Uiso 0.50 calc PR .
H61B H 1.2721(18) 1.4337(13) 0.2277(9) 0.135 Uiso 0.50 calc PR .
H61C H 1.3567(18) 1.4987(13) 0.3081(9) 0.135 Uiso 0.50 calc PR .
C61A C 1.2138(20) 1.5287(14) 0.2345(9) 0.103(5) Uiso 0.50 d P .
H61D H 1.1566(20) 1.5867(14) 0.2244(9) 0.154 Uiso 0.50 calc PR .
H61E H 1.2056(20) 1.4822(14) 0.1875(9) 0.154 Uiso 0.50 calc PR .
H61F H 1.3155(20) 1.5650(14) 0.2551(9) 0.154 Uiso 0.50 calc PR .
C62 C 1.1389(9) 1.5207(7) 0.3677(4) 0.114(3) Uani 1 d . .
H62A H 1.0708(9) 1.5691(7) 0.3508(4) 0.171 Uiso 1 calc R .
H62B H 1.2346(9) 1.5678(7) 0.3901(4) 0.171 Uiso 1 calc R .
H62C H 1.1048(9) 1.4743(7) 0.4055(4) 0.171 Uiso 1 calc R .
C70 C 0.7086(9) 1.4944(6) 0.2179(3) 0.091(2) Uani 1 d . .
H70A H 0.8138(9) 1.5204(6) 0.2343(3) 0.137 Uiso 1 calc R .
H70B H 0.6711(9) 1.4535(6) 0.2571(3) 0.137 Uiso 1 calc R .
H70C H 0.6637(9) 1.5596(6) 0.2091(3) 0.137 Uiso 1 calc R .
C71 C 0.6124(15) 1.4550(11) 0.0736(6) 0.060(3) Uiso 0.50 d P .
H71A H 0.6841(15) 1.5149(11) 0.0601(6) 0.089 Uiso 0.50 calc PR .
H71B H 0.5258(15) 1.4837(11) 0.0773(6) 0.089 Uiso 0.50 calc PR .
H71C H 0.5864(15) 1.3909(11) 0.0348(6) 0.089 Uiso 0.50 calc PR .
C71A C 0.7174(22) 1.5113(15) 0.0845(10) 0.124(6) Uiso 0.50 d P .
H71D H 0.8164(22) 1.5550(15) 0.1036(10) 0.186 Uiso 0.50 calc PR .
H71E H 0.6501(22) 1.5626(15) 0.0783(10) 0.186 Uiso 0.50 calc PR .
H71F H 0.7107(22) 1.4700(15) 0.0357(10) 0.186 Uiso 0.50 calc PR .
C72 C 0.5442(33) 1.3714(25) 0.1121(17) 0.211(12) Uiso 0.50 d P .
H72A H 0.5029(33) 1.3140(25) 0.1419(17) 0.316 Uiso 0.50 calc PR .
H72B H 0.5457(33) 1.3358(25) 0.0627(17) 0.316 Uiso 0.50 calc PR .
H72C H 0.4851(33) 1.4287(25) 0.1052(17) 0.316 Uiso 0.50 calc PR .
C72A C 0.5355(11) 1.3130(8) 0.1583(6) 0.045(3) Uiso 0.50 d P .
H72D H 0.5656(11) 1.2796(8) 0.2053(6) 0.067 Uiso 0.50 calc PR .
H72E H 0.5114(11) 1.2548(8) 0.1156(6) 0.067 Uiso 0.50 calc PR .
H72F H 0.4503(11) 1.3445(8) 0.1606(6) 0.067 Uiso 0.50 calc PR .
 
loop_
  _atom_site_aniso_label
  _atom_site_aniso_U_11
  _atom_site_aniso_U_22
  _atom_site_aniso_U_33
  _atom_site_aniso_U_23
  _atom_site_aniso_U_13
  _atom_site_aniso_U_12
B1 0.027(4) 0.049(4) 0.050(4) 0.007(3) -0.007(3) 0.003(3)
Si1 0.0237(8) 0.0452(9) 0.0377(8) 0.0032(6) 0.0067(6) 0.0028(6)
Si2 0.0269(9) 0.0506(9) 0.0433(9) -0.0018(7) 0.0068(6) 0.0027(7)
O1 0.055(3) 0.045(2) 0.050(2) 0.005(2) 0.001(2) 0.003(2)
O2 0.045(2) 0.044(2) 0.063(2) 0.001(2) 0.018(2) 0.004(2)
O3 0.044(2) 0.044(2) 0.051(2) 0.006(2) 0.015(2) 0.008(2)
O12 0.025(2) 0.071(2) 0.041(2) 0.001(2) 0.005(2) 0.010(2)
O13 0.042(2) 0.061(2) 0.050(2) 0.019(2) 0.003(2) -0.006(2)
O14 0.022(2) 0.141(4) 0.049(2) 0.000(2) 0.006(2) 0.022(2)
O15 0.048(3) 0.111(3) 0.052(2) -0.020(2) 0.015(2) 0.012(2)
O16 0.042(3) 0.085(3) 0.063(2) -0.020(2) 0.008(2) -0.011(2)
O17 0.075(3) 0.094(3) 0.050(2) -0.001(2) -0.006(2) 0.048(3)
C1 0.059(4) 0.053(3) 0.041(3) 0.006(3) 0.015(3) 0.002(3)
C2 0.027(3) 0.065(4) 0.038(3) 0.000(3) -0.001(2) 0.007(3)
C3 0.037(3) 0.046(3) 0.042(3) 0.004(3) 0.010(2) -0.008(2)
C4 0.027(3) 0.060(3) 0.052(3) 0.010(3) 0.011(3) 0.010(3)
C5 0.055(4) 0.058(4) 0.057(4) 0.007(3) 0.027(3) 0.010(3)
C6 0.028(4) 0.097(5) 0.089(5) -0.039(4) -0.001(3) 0.005(3)
C7 0.075(5) 0.099(5) 0.045(3) -0.003(3) -0.003(3) 0.057(4)
C10 0.111(6) 0.069(4) 0.056(4) -0.002(3) -0.006(4) 0.018(4)
C11 0.081(5) 0.059(4) 0.066(4) 0.007(3) 0.033(4) 0.014(3)
C12 0.065(5) 0.086(5) 0.079(4) -0.007(4) 0.035(4) -0.019(4)
C20 0.051(4) 0.100(5) 0.097(5) -0.026(4) -0.020(4) 0.033(4)
C22 0.060(5) 0.095(5) 0.092(5) 0.015(4) -0.012(4) -0.011(4)
C32 0.140(7) 0.059(4) 0.060(4) 0.004(3) 0.002(4) -0.006(4)
C41 0.035(4) 0.150(7) 0.079(5) 0.015(4) 0.004(3) 0.019(4)
C50 0.056(5) 0.152(7) 0.106(6) -0.064(5) 0.004(4) 0.002(5)
C51 0.058(5) 0.132(6) 0.087(5) -0.021(4) 0.026(4) 0.018(4)
C62 0.086(6) 0.129(7) 0.100(6) -0.061(5) -0.016(5) 0.016(5)
C70 0.133(7) 0.096(5) 0.056(4) 0.002(4) 0.007(4) 0.067(5)
 
_geom_special_details
;
  All esds (except the esd in the dihedral angle between two l.s. planes)
  are estimated using the full covariance matrix.  The cell esds are taken
  into account individually in the estimation of esds in distances, angles
  and torsion angles; correlations between esds in cell parameters are only
  used when they are defined by crystal symmetry.  An approximate (isotropic)
  treatment of cell esds is used for estimating esds involving l.s. planes.
;
 
loop_
  _geom_bond_atom_site_label_1
  _geom_bond_atom_site_label_2
  _geom_bond_distance
  _geom_bond_site_symmetry_2
  _geom_bond_publ_flag
B1 O1 1.349(7) . ?
B1 O3 1.361(7) . ?
B1 O2 1.374(7) . ?
Si1 O13 1.590(4) . ?
Si1 O14 1.592(4) . ?
Si1 O12 1.601(3) . ?
Si1 O1 1.610(4) . ?
Si2 O17 1.594(4) . ?
Si2 O16 1.601(4) . ?
Si2 O15 1.605(4) . ?
Si2 O2 1.610(4) . ?
O3 C1 1.438(6) . ?
O12 C2 1.457(6) . ?
O13 C3 1.436(6) . ?
O14 C4 1.413(6) . ?
O15 C5 1.410(6) . ?
O16 C6 1.383(6) . ?
O17 C7 1.407(6) . ?
C1 C11 1.503(7) . ?
C1 C10 1.526(8) . ?
C1 C12 1.532(8) . ?
C2 C20 1.495(7) . ?
C2 C21A 1.507(10) . ?
C2 C22 1.521(8) . ?
C2 C21 1.524(15) . ?
C3 C31 1.425(14) . ?
C3 C32 1.476(7) . ?
C3 C30 1.522(13) . ?
C3 C30A 1.58(2) . ?
C3 C31A 1.608(13) . ?
C4 C40A 1.398(14) . ?
C4 C41 1.477(7) . ?
C4 C42 1.510(12) . ?
C4 C42A 1.570(13) . ?
C4 C40 1.587(12) . ?
C5 C52A 1.49(2) . ?
C5 C51 1.500(8) . ?
C5 C52 1.502(13) . ?
C5 C50 1.520(9) . ?
C6 C60 1.34(2) . ?
C6 C61 1.37(2) . ?
C6 C62 1.509(9) . ?
C6 C60A 1.682(14) . ?
C6 C61A 1.71(2) . ?
C7 C72 1.26(3) . ?
C7 C71 1.443(12) . ?
C7 C70 1.454(8) . ?
C7 C71A 1.66(2) . ?
C7 C72A 1.680(12) . ?
 
loop_
  _geom_angle_atom_site_label_1
  _geom_angle_atom_site_label_2
  _geom_angle_atom_site_label_3
  _geom_angle
  _geom_angle_site_symmetry_1
  _geom_angle_site_symmetry_3
  _geom_angle_publ_flag
O1 B1 O3 123.4(6) . . ?
O1 B1 O2 120.0(5) . . ?
O3 B1 O2 116.6(5) . . ?
O13 Si1 O14 109.3(2) . . ?
O13 Si1 O12 108.5(2) . . ?
O14 Si1 O12 110.4(2) . . ?
O13 Si1 O1 107.5(2) . . ?
O14 Si1 O1 109.5(2) . . ?
O12 Si1 O1 111.6(2) . . ?
O17 Si2 O16 110.3(2) . . ?
O17 Si2 O15 108.9(2) . . ?
O16 Si2 O15 110.1(2) . . ?
O17 Si2 O2 110.4(2) . . ?
O16 Si2 O2 110.0(2) . . ?
O15 Si2 O2 107.1(2) . . ?
B1 O1 Si1 141.8(4) . . ?
B1 O2 Si2 136.7(4) . . ?
B1 O3 C1 127.0(4) . . ?
C2 O12 Si1 134.3(3) . . ?
C3 O13 Si1 136.3(3) . . ?
C4 O14 Si1 139.8(3) . . ?
C5 O15 Si2 136.3(4) . . ?
C6 O16 Si2 139.9(4) . . ?
C7 O17 Si2 140.4(4) . . ?
O3 C1 C11 105.4(4) . . ?
O3 C1 C10 109.8(5) . . ?
C11 C1 C10 109.5(5) . . ?
O3 C1 C12 110.3(4) . . ?
C11 C1 C12 110.3(5) . . ?
C10 C1 C12 111.4(5) . . ?
O12 C2 C20 109.4(4) . . ?
O12 C2 C21A 105.6(5) . . ?
C20 C2 C21A 120.1(6) . . ?
O12 C2 C22 110.3(4) . . ?
C20 C2 C22 109.6(5) . . ?
C21A C2 C22 101.3(6) . . ?
O12 C2 C21 106.3(7) . . ?
C20 C2 C21 97.7(7) . . ?
C21A C2 C21 25.1(6) . . ?
C22 C2 C21 122.6(7) . . ?
C31 C3 O13 108.2(7) . . ?
C31 C3 C32 121.2(8) . . ?
O13 C3 C32 112.3(4) . . ?
C31 C3 C30 83.9(8) . . ?
O13 C3 C30 107.7(6) . . ?
C32 C3 C30 120.0(7) . . ?
C31 C3 C30A 111.3(9) . . ?
O13 C3 C30A 101.4(7) . . ?
C32 C3 C30A 100.5(7) . . ?
C30 C3 C30A 27.6(6) . . ?
C31 C3 C31A 23.5(8) . . ?
O13 C3 C31A 108.4(6) . . ?
C32 C3 C31A 101.7(6) . . ?
C30 C3 C31A 105.9(8) . . ?
C30A C3 C31A 132.1(9) . . ?
C40A C4 O14 120.9(7) . . ?
C40A C4 C41 117.7(7) . . ?
O14 C4 C41 108.4(4) . . ?
C40A C4 C42 65.5(8) . . ?
O14 C4 C42 117.9(6) . . ?
C41 C4 C42 121.4(6) . . ?
C40A C4 C42A 109.8(9) . . ?
O14 C4 C42A 99.2(6) . . ?
C41 C4 C42A 96.1(7) . . ?
C42 C4 C42A 44.7(6) . . ?
C40A C4 C40 40.5(7) . . ?
O14 C4 C40 97.4(6) . . ?
C41 C4 C40 101.8(6) . . ?
C42 C4 C40 105.6(7) . . ?
C42A C4 C40 150.2(8) . . ?
O15 C5 C52A 99.7(10) . . ?
O15 C5 C51 107.5(5) . . ?
C52A C5 C51 100.3(10) . . ?
O15 C5 C52 116.4(6) . . ?
C52A C5 C52 34.2(9) . . ?
C51 C5 C52 118.5(7) . . ?
O15 C5 C50 107.0(5) . . ?
C52A C5 C50 132.4(11) . . ?
C51 C5 C50 108.1(5) . . ?
C52 C5 C50 98.1(8) . . ?
C60 C6 C61 73.4(11) . . ?
C60 C6 O16 118.3(11) . . ?
C61 C6 O16 123.0(9) . . ?
C60 C6 C62 121.0(11) . . ?
C61 C6 C62 112.3(8) . . ?
O16 C6 C62 106.5(5) . . ?
C60 C6 C60A 33.3(10) . . ?
C61 C6 C60A 106.7(9) . . ?
O16 C6 C60A 100.8(6) . . ?
C62 C6 C60A 105.8(7) . . ?
C60 C6 C61A 103.3(12) . . ?
C61 C6 C61A 33.2(8) . . ?
O16 C6 C61A 95.9(7) . . ?
C62 C6 C61A 108.3(7) . . ?
C60A C6 C61A 135.7(9) . . ?
C72 C7 O17 113.7(14) . . ?
C72 C7 C71 60.5(14) . . ?
O17 C7 C71 110.8(6) . . ?
C72 C7 C70 123.4(15) . . ?
O17 C7 C70 115.5(5) . . ?
C71 C7 C70 121.6(7) . . ?
C72 C7 C71A 99.5(15) . . ?
O17 C7 C71A 96.5(8) . . ?
C71 C7 C71A 39.0(7) . . ?
C70 C7 C71A 101.2(8) . . ?
C72 C7 C72A 41.4(14) . . ?
O17 C7 C72A 99.2(5) . . ?
C71 C7 C72A 101.9(8) . . ?
C70 C7 C72A 103.9(6) . . ?
C71A C7 C72A 140.9(9) . . ?
 
loop_
  _geom_torsion_atom_site_label_1
  _geom_torsion_atom_site_label_2
  _geom_torsion_atom_site_label_3
  _geom_torsion_atom_site_label_4
  _geom_torsion
  _geom_torsion_site_symmetry_1
  _geom_torsion_site_symmetry_2
  _geom_torsion_site_symmetry_3
  _geom_torsion_site_symmetry_4
  _geom_torsion_publ_flag
  O3 B1 O1 Si1 168.2(4) . . . . ?
  O2 B1 O1 Si1 -11.7(9) . . . . ?
  O13 Si1 O1 B1 -156.8(6) . . . . ?
  O14 Si1 O1 B1 84.6(6) . . . . ?
  O12 Si1 O1 B1 -38.0(6) . . . . ?
  O1 B1 O2 Si2 -168.1(4) . . . . ?
  O3 B1 O2 Si2 12.0(8) . . . . ?
  O17 Si2 O2 B1 -81.7(5) . . . . ?
  O16 Si2 O2 B1 40.2(5) . . . . ?
  O15 Si2 O2 B1 159.9(5) . . . . ?
  O1 B1 O3 C1 0.3(8) . . . . ?
  O2 B1 O3 C1 -179.8(4) . . . . ?
  O13 Si1 O12 C2 47.6(5) . . . . ?
  O14 Si1 O12 C2 167.4(4) . . . . ?
  O1 Si1 O12 C2 -70.6(5) . . . . ?
  O14 Si1 O13 C3 34.4(5) . . . . ?
  O12 Si1 O13 C3 154.9(4) . . . . ?
  O1 Si1 O13 C3 -84.4(5) . . . . ?
  O13 Si1 O14 C4 138.4(6) . . . . ?
  O12 Si1 O14 C4 19.1(7) . . . . ?
  O1 Si1 O14 C4 -104.1(6) . . . . ?
  O17 Si2 O15 C5 -24.0(6) . . . . ?
  O16 Si2 O15 C5 -145.0(5) . . . . ?
  O2 Si2 O15 C5 95.4(6) . . . . ?
  O17 Si2 O16 C6 -152.5(7) . . . . ?
  O15 Si2 O16 C6 -32.3(7) . . . . ?
  O2 Si2 O16 C6 85.5(7) . . . . ?
  O16 Si2 O17 C7 -38.3(8) . . . . ?
  O15 Si2 O17 C7 -159.2(7) . . . . ?
  O2 Si2 O17 C7 83.5(7) . . . . ?
  B1 O3 C1 C11 -177.1(5) . . . . ?
  B1 O3 C1 C10 65.1(6) . . . . ?
  B1 O3 C1 C12 -58.1(7) . . . . ?
  Si1 O12 C2 C20 54.3(7) . . . . ?
  Si1 O12 C2 C21A -175.1(5) . . . . ?
  Si1 O12 C2 C22 -66.3(6) . . . . ?
  Si1 O12 C2 C21 158.8(7) . . . . ?
  Si1 O13 C3 C31 -94.9(8) . . . . ?
  Si1 O13 C3 C32 41.4(7) . . . . ?
  Si1 O13 C3 C30 175.7(6) . . . . ?
  Si1 O13 C3 C30A 147.9(7) . . . . ?
  Si1 O13 C3 C31A -70.2(8) . . . . ?
  Si1 O14 C4 C40A -41.5(11) . . . . ?
  Si1 O14 C4 C41 178.0(5) . . . . ?
  Si1 O14 C4 C42 35.2(10) . . . . ?
  Si1 O14 C4 C42A 78.4(8) . . . . ?
  Si1 O14 C4 C40 -76.8(8) . . . . ?
  Si2 O15 C5 C52A 90.7(11) . . . . ?
  Si2 O15 C5 C51 -165.3(5) . . . . ?
  Si2 O15 C5 C52 59.1(10) . . . . ?
  Si2 O15 C5 C50 -49.4(7) . . . . ?
  Si2 O16 C6 C60 -21.5(16) . . . . ?
  Si2 O16 C6 C61 66.4(12) . . . . ?
  Si2 O16 C6 C62 -161.9(5) . . . . ?
  Si2 O16 C6 C60A -51.8(9) . . . . ?
  Si2 O16 C6 C61A 87.0(8) . . . . ?
  Si2 O17 C7 C72 -132.7(17) . . . . ?
  Si2 O17 C7 C71 161.4(7) . . . . ?
  Si2 O17 C7 C70 18.2(11) . . . . ?
  Si2 O17 C7 C71A 123.9(9) . . . . ?
  Si2 O17 C7 C72A -92.1(8) . . . . ?
 
_refine_diff_density_max    0.435
_refine_diff_density_min   -0.372
_refine_diff_density_rms    0.075

#===END

data_Cp2ZrOB_compound_4
 
_publ_requested_category          'FM'
_audit_creation_method            SHELXL-97
_chemical_name_systematic
;
  ?
;
_chemical_name_common             ?
_chemical_melting_point           ?
_chemical_formula_moiety          'C35 H67 B O9 Si2 Zr'
_chemical_formula_sum             'C35 H67 B O9 Si2 Zr'
_chemical_formula_weight          790.10
 
loop_
  _atom_type_symbol
  _atom_type_description
  _atom_type_scat_dispersion_real
  _atom_type_scat_dispersion_imag
  _atom_type_scat_source
  'C'  'C'   0.0033   0.0016
  'International Tables Vol C Tables 4.2.6.8 and 6.1.1.4'
  'H'  'H'   0.0000   0.0000
  'International Tables Vol C Tables 4.2.6.8 and 6.1.1.4'
  'B'  'B'   0.0013   0.0007
  'International Tables Vol C Tables 4.2.6.8 and 6.1.1.4'
  'O'  'O'   0.0106   0.0060
  'International Tables Vol C Tables 4.2.6.8 and 6.1.1.4'
  'Si'  'Si'   0.0817   0.0704
  'International Tables Vol C Tables 4.2.6.8 and 6.1.1.4'
  'Zr'  'Zr'  -2.9673   0.5597
  'International Tables Vol C Tables 4.2.6.8 and 6.1.1.4'
 
_symmetry_cell_setting            triclinic
_symmetry_space_group_name_H-M    'P -1'
 
loop_
  _symmetry_equiv_pos_as_xyz
  'x, y, z'
  '-x, -y, -z'
 
_cell_length_a                    33.0365(6)
_cell_length_b                    34.9417(7)
_cell_length_c                    40.9629(8)
_cell_angle_alpha                 103.1340(10)
_cell_angle_beta                  92.8090(10)
_cell_angle_gamma                 118.2060(10)
_cell_volume                      39900.9(13)
_cell_formula_units_Z             36
_cell_measurement_temperature     155(2)
_cell_measurement_reflns_used     8192
_cell_measurement_theta_min       1.75
_cell_measurement_theta_max       23.33
 
_exptl_crystal_description        'irregular prism'
_exptl_crystal_colour             colorless
_exptl_crystal_size_max           0.50
_exptl_crystal_size_mid           0.40
_exptl_crystal_size_min           0.20
_exptl_crystal_density_meas       ?
_exptl_crystal_density_diffrn     1.184
_exptl_crystal_density_method     'not measured'
_exptl_crystal_F_000              15192
_exptl_absorpt_coefficient_mu     0.346
_exptl_absorpt_correction_type    empirical
_exptl_absorpt_correction_T_min   0.603
_exptl_absorpt_correction_T_max   0.862
_exptl_absorpt_process_details    'Blessing, 1995'
 
_exptl_special_details
;
  ?
;
 
_diffrn_ambient_temperature       155(2)
_diffrn_radiation_wavelength      0.71073
_diffrn_radiation_type            MoK\a
_diffrn_radiation_source          'fine-focus sealed tube'
_diffrn_radiation_monochromator   graphite
_diffrn_measurement_device_type   'SMART CCD'
_diffrn_measurement_method        \w-scans
_diffrn_detector_area_resol_mean  ?
_diffrn_standards_number          ?
_diffrn_standards_interval_count  ?
_diffrn_standards_interval_time   ?
_diffrn_standards_decay_%         ?
_diffrn_reflns_number             185691
_diffrn_reflns_av_R_equivalents   0.0606
_diffrn_reflns_av_sigmaI/netI     0.1373
_diffrn_reflns_limit_h_min        -36
_diffrn_reflns_limit_h_max        35
_diffrn_reflns_limit_k_min        -25
_diffrn_reflns_limit_k_max        38
_diffrn_reflns_limit_l_min        -45
_diffrn_reflns_limit_l_max        44
_diffrn_reflns_theta_min          2.72
_diffrn_reflns_theta_max          23.26
_reflns_number_total              112301
_reflns_number_gt                 53974
_reflns_threshold_expression      >2sigma(I)
 
_computing_data_collection        'Bruker SMART'
_computing_cell_refinement        'Bruker SAINT'
_computing_data_reduction         'Bruker SAINT'
_computing_structure_solution     'SHELXTL-XS (Bruker, 1995)'
_computing_structure_refinement   'SHELXTL-XL (Bruker, 1995)'
_computing_molecular_graphics     'SHELXTL-XP'(Bruker, 1995)'
_computing_publication_material   ?
 
_refine_special_details
;
  Refinement of F^2^ against ALL reflections.  The weighted R-factor wR and
  goodness of fit S are based on F^2^, conventional R-factors R are based
  on F, with F set to zero for negative F^2^. The threshold expression of
  F^2^ > 2sigma(F^2^) is used only for calculating R-factors(gt) etc. and is
  not relevant to the choice of reflections for refinement.  R-factors based
  on F^2^ are statistically about twice as large as those based on F, and R-
  factors based on ALL data will be even larger.
;
 
_refine_ls_structure_factor_coef  Fsqd
_refine_ls_matrix_type            fullcycle
_refine_ls_weighting_scheme       calc
_refine_ls_weighting_details
  'calc w=1/[\s^2^(Fo^2^)+(0.1000P)^2^+0.0000P] where P=(Fo^2^+2Fc^2^)/3'
_atom_sites_solution_primary      direct
_atom_sites_solution_secondary    difmap
_atom_sites_solution_hydrogens    geom
_refine_ls_hydrogen_treatment     mixed
_refine_ls_extinction_method      none
_refine_ls_extinction_coef        ?
_refine_ls_number_reflns          112301
_refine_ls_number_parameters      7648
_refine_ls_number_restraints      0
_refine_ls_R_factor_all           0.1630
_refine_ls_R_factor_gt            0.0674
_refine_ls_wR_factor_ref          0.2038
_refine_ls_wR_factor_gt           0.1544
_refine_ls_goodness_of_fit_ref    0.943
_refine_ls_restrained_S_all       0.943
_refine_ls_shift/su_max           0.525
_refine_ls_shift/su_mean          0.066
 
loop_
  _atom_site_label
  _atom_site_type_symbol
  _atom_site_fract_x
  _atom_site_fract_y
  _atom_site_fract_z
  _atom_site_U_iso_or_equiv
  _atom_site_adp_type
  _atom_site_occupancy
  _atom_site_symmetry_multiplicity
  _atom_site_calc_flag
  _atom_site_refinement_flags
  _atom_site_disorder_assembly
  _atom_site_disorder_group
Zr1_1 Zr -0.36811(2) 0.59057(2) -0.118818(16) 0.02872(16) Uani 1 1 d . . .
Si1_1 Si -0.20119(6) 0.68926(6) -0.08298(5) 0.0314(5) Uani 1 1 d . . .
Si2_1 Si -0.27793(7) 0.77984(6) -0.05589(5) 0.0326(5) Uani 1 1 d . . .
O1_1 O -0.31826(15) 0.65251(13) -0.09275(12) 0.0402(12) Uani 1 1 d . . .
O2_1 O -0.23814(15) 0.70378(15) -0.06870(12) 0.0459(13) Uani 1 1 d . . .
O3_1 O -0.29415(15) 0.72707(13) -0.06188(12) 0.0378(12) Uani 1 1 d . . .
O4_1 O -0.14913(15) 0.72894(15) -0.06571(12) 0.0479(14) Uani 1 1 d . . .
O5_1 O -0.21150(18) 0.6818(2) -0.12327(13) 0.0733(18) Uani 1 1 d . . .
O6_1 O -0.20723(18) 0.64372(18) -0.07705(18) 0.088(2) Uani 1 1 d . . .
O7_1 O -0.24843(15) 0.80023(14) -0.08397(12) 0.0390(12) Uani 1 1 d . . .
O8_1 O -0.24421(15) 0.80698(13) -0.01897(11) 0.0377(12) Uani 1 1 d . . .
O9_1 O -0.32368(15) 0.78585(14) -0.05775(11) 0.0372(12) Uani 1 1 d . . .
C1_1 C -0.3556(3) 0.5728(2) -0.17884(18) 0.048(2) Uani 1 1 d . . .
H1_1 H -0.3364 0.5602 -0.1828 0.057 Uiso 1 1 calc R . .
C2_1 C -0.3400(3) 0.6192(2) -0.16959(19) 0.052(2) Uani 1 1 d . . .
H2_1 H -0.3095 0.6426 -0.1667 0.063 Uiso 1 1 calc R . .
C3_1 C -0.3796(3) 0.6235(3) -0.16555(19) 0.052(2) Uani 1 1 d . . .
H3_1 H -0.3801 0.6506 -0.1593 0.062 Uiso 1 1 calc R . .
C4_1 C -0.4190(3) 0.5796(3) -0.17265(18) 0.046(2) Uani 1 1 d . . .
H4_1 H -0.4496 0.5729 -0.1717 0.055 Uiso 1 1 calc R . .
C5_1 C -0.4039(3) 0.5481(2) -0.18131(17) 0.044(2) Uani 1 1 d . . .
H5_1 H -0.4225 0.5167 -0.1875 0.052 Uiso 1 1 calc R . .
C6_1 C -0.3749(4) 0.5140(3) -0.1237(2) 0.061(3) Uani 1 1 d . . .
H6_1 H -0.3837 0.4931 -0.1450 0.073 Uiso 1 1 calc R . .
C7_1 C -0.3300(4) 0.5470(4) -0.1084(3) 0.073(3) Uani 1 1 d . . .
H7_1 H -0.3034 0.5531 -0.1179 0.088 Uiso 1 1 calc R . .
C8_1 C -0.3315(4) 0.5692(3) -0.0767(3) 0.066(3) Uani 1 1 d . . .
H8_1 H -0.3060 0.5928 -0.0607 0.080 Uiso 1 1 calc R . .
C9_1 C -0.3774(4) 0.5507(3) -0.0728(2) 0.063(3) Uani 1 1 d . . .
H9_1 H -0.3885 0.5591 -0.0536 0.075 Uiso 1 1 calc R . .
C10_1 C -0.4041(3) 0.5169(3) -0.1028(2) 0.055(2) Uani 1 1 d . . .
H10_1 H -0.4366 0.4995 -0.1077 0.066 Uiso 1 1 calc R . .
C11_1 C -0.4300(2) 0.5949(2) -0.09896(18) 0.045(2) Uani 1 1 d . . .
H11A_1 H -0.4356 0.6152 -0.1081 0.067 Uiso 1 1 calc R . .
H11B_1 H -0.4229 0.6059 -0.0745 0.067 Uiso 1 1 calc R . .
H11C_1 H -0.4573 0.5653 -0.1059 0.067 Uiso 1 1 calc R . .
C12_1 C -0.1250(2) 0.7770(2) -0.04997(19) 0.044(2) Uani 1 1 d . . .
C13_1 C -0.0730(2) 0.7922(2) -0.0473(2) 0.067(3) Uani 1 1 d . . .
H13A_1 H -0.0651 0.7769 -0.0335 0.100 Uiso 1 1 calc R . .
H13B_1 H -0.0549 0.8243 -0.0369 0.100 Uiso 1 1 calc R . .
H13C_1 H -0.0662 0.7849 -0.0696 0.100 Uiso 1 1 calc R . .
C14_1 C -0.1384(3) 0.8004(3) -0.0715(2) 0.073(3) Uani 1 1 d . . .
H14A_1 H -0.1299 0.7949 -0.0934 0.109 Uiso 1 1 calc R . .
H14B_1 H -0.1223 0.8324 -0.0605 0.109 Uiso 1 1 calc R . .
H14C_1 H -0.1715 0.7888 -0.0743 0.109 Uiso 1 1 calc R . .
C15_1 C -0.1381(3) 0.7850(3) -0.01498(19) 0.066(3) Uani 1 1 d . . .
H15A_1 H -0.1294 0.7698 -0.0017 0.099 Uiso 1 1 calc R . .
H15B_1 H -0.1712 0.7734 -0.0175 0.099 Uiso 1 1 calc R . .
H15C_1 H -0.1220 0.8169 -0.0036 0.099 Uiso 1 1 calc R . .
C16_1 C -0.1906(3) 0.6717(2) -0.15105(17) 0.0380(18) Uani 1 1 d . . .
C17_1 C -0.1390(3) 0.6903(3) -0.14166(19) 0.058(2) Uani 1 1 d . . .
H17A_1 H -0.1332 0.6769 -0.1253 0.087 Uiso 1 1 calc R . .
H17B_1 H -0.1237 0.7225 -0.1320 0.087 Uiso 1 1 calc R . .
H17C_1 H -0.1270 0.6833 -0.1617 0.087 Uiso 1 1 calc R . .
C18_1 C -0.2002(3) 0.6925(3) -0.1765(3) 0.110(4) Uani 1 1 d . . .
H18A_1 H -0.2333 0.6805 -0.1823 0.165 Uiso 1 1 calc R . .
H18B_1 H -0.1884 0.6856 -0.1967 0.165 Uiso 1 1 calc R . .
H18C_1 H -0.1851 0.7248 -0.1669 0.165 Uiso 1 1 calc R . .
C19_1 C -0.2163(3) 0.6208(3) -0.1659(2) 0.090(3) Uani 1 1 d . . .
H19A_1 H -0.2491 0.6099 -0.1716 0.135 Uiso 1 1 calc R . .
H19B_1 H -0.2110 0.6072 -0.1495 0.135 Uiso 1 1 calc R . .
H19C_1 H -0.2050 0.6129 -0.1861 0.135 Uiso 1 1 calc R . .
C20_1 C -0.1869(3) 0.6308(2) -0.0530(2) 0.048(2) Uani 1 1 d . . .
C21_1 C -0.1350(3) 0.6519(3) -0.0520(2) 0.064(2) Uani 1 1 d . . .
H21A_1 H -0.1292 0.6414 -0.0741 0.096 Uiso 1 1 calc R . .
H21B_1 H -0.1217 0.6434 -0.0355 0.096 Uiso 1 1 calc R . .
H21C_1 H -0.1210 0.6843 -0.0458 0.096 Uiso 1 1 calc R . .
C22_1 C -0.1967(3) 0.6463(5) -0.0193(2) 0.143(6) Uani 1 1 d . . .
H22A_1 H -0.1805 0.6788 -0.0120 0.215 Uiso 1 1 calc R . .
H22B_1 H -0.1863 0.6353 -0.0032 0.215 Uiso 1 1 calc R . .
H22C_1 H -0.2297 0.6349 -0.0209 0.215 Uiso 1 1 calc R . .
C23_1 C -0.2113(3) 0.5803(3) -0.0659(3) 0.124(5) Uani 1 1 d . . .
H23A_1 H -0.2040 0.5715 -0.0878 0.187 Uiso 1 1 calc R . .
H23B_1 H -0.2445 0.5684 -0.0680 0.187 Uiso 1 1 calc R . .
H23C_1 H -0.2012 0.5686 -0.0502 0.187 Uiso 1 1 calc R . .
C24_1 C -0.2614(3) 0.7974(3) -0.1188(2) 0.054(2) Uani 1 1 d . . .
C25_1 C -0.2170(3) 0.8130(3) -0.1336(2) 0.073(3) Uani 1 1 d . . .
H25A_1 H -0.1945 0.8435 -0.1207 0.109 Uiso 1 1 calc R . .
H25B_1 H -0.2238 0.8121 -0.1569 0.109 Uiso 1 1 calc R . .
H25C_1 H -0.2044 0.7935 -0.1326 0.109 Uiso 1 1 calc R . .
C26_1 C -0.2801(3) 0.8294(3) -0.1198(2) 0.096(3) Uani 1 1 d . . .
H26A_1 H -0.2569 0.8596 -0.1070 0.144 Uiso 1 1 calc R . .
H26B_1 H -0.3078 0.8202 -0.1099 0.144 Uiso 1 1 calc R . .
H26C_1 H -0.2874 0.8286 -0.1430 0.144 Uiso 1 1 calc R . .
C27_1 C -0.2970(3) 0.7500(3) -0.1386(2) 0.099(4) Uani 1 1 d . . .
H27A_1 H -0.3249 0.7405 -0.1290 0.148 Uiso 1 1 calc R . .
H27B_1 H -0.2847 0.7301 -0.1377 0.148 Uiso 1 1 calc R . .
H27C_1 H -0.3041 0.7488 -0.1620 0.148 Uiso 1 1 calc R . .
C28_1 C -0.2254(3) 0.8544(2) 0.00104(19) 0.045(2) Uani 1 1 d . . .
C29_1 C -0.1823(3) 0.8659(3) 0.0241(2) 0.075(3) Uani 1 1 d . . .
H29A_1 H -0.1903 0.8458 0.0382 0.112 Uiso 1 1 calc R . .
H29B_1 H -0.1684 0.8966 0.0382 0.112 Uiso 1 1 calc R . .
H29C_1 H -0.1605 0.8627 0.0106 0.112 Uiso 1 1 calc R . .
C30_1 C -0.2612(3) 0.8576(3) 0.0222(2) 0.084(3) Uani 1 1 d . . .
H30A_1 H -0.2888 0.8501 0.0073 0.125 Uiso 1 1 calc R . .
H30B_1 H -0.2481 0.8878 0.0370 0.125 Uiso 1 1 calc R . .
H30C_1 H -0.2692 0.8367 0.0357 0.125 Uiso 1 1 calc R . .
C31_1 C -0.2157(3) 0.8846(2) -0.0218(2) 0.076(3) Uani 1 1 d . . .
H31A_1 H -0.2444 0.8759 -0.0361 0.115 Uiso 1 1 calc R . .
H31B_1 H -0.1943 0.8816 -0.0359 0.115 Uiso 1 1 calc R . .
H31C_1 H -0.2022 0.9154 -0.0082 0.115 Uiso 1 1 calc R . .
C32_1 C -0.3704(3) 0.7596(2) -0.0525(2) 0.045(2) Uani 1 1 d . . .
C33_1 C -0.3992(3) 0.7217(3) -0.0853(2) 0.069(3) Uani 1 1 d . . .
H33A_1 H -0.3868 0.7016 -0.0901 0.103 Uiso 1 1 calc R . .
H33B_1 H -0.3979 0.7346 -0.1039 0.103 Uiso 1 1 calc R . .
H33C_1 H -0.4311 0.7052 -0.0825 0.103 Uiso 1 1 calc R . .
C34_1 C -0.3895(3) 0.7921(3) -0.0445(3) 0.079(3) Uani 1 1 d . . .
H34A_1 H -0.3711 0.8157 -0.0238 0.119 Uiso 1 1 calc R . .
H34B_1 H -0.4213 0.7759 -0.0415 0.119 Uiso 1 1 calc R . .
H34C_1 H -0.3881 0.8052 -0.0629 0.119 Uiso 1 1 calc R . .
C35_1 C -0.3715(3) 0.7400(3) -0.0227(2) 0.060(2) Uani 1 1 d . . .
H35A_1 H -0.3533 0.7641 -0.0023 0.090 Uiso 1 1 calc R . .
H35B_1 H -0.3587 0.7201 -0.0273 0.090 Uiso 1 1 calc R . .
H35C_1 H -0.4032 0.7233 -0.0196 0.090 Uiso 1 1 calc R . .
B1_1 B -0.2836(3) 0.6933(3) -0.0755(2) 0.0293(19) Uiso 1 1 d . . .
Zr1_2 Zr -0.62754(2) 0.14120(2) -0.138743(18) 0.03800(18) Uani 1 1 d . . .
Si1_2 Si -0.75823(7) 0.05416(6) -0.25671(6) 0.0408(5) Uani 1 1 d . . .
Si2_2 Si -0.69098(7) -0.01966(6) -0.20649(5) 0.0372(5) Uani 1 1 d . . .
O1_2 O -0.66380(16) 0.08668(14) -0.17800(12) 0.0471(13) Uani 1 1 d . . .
O2_2 O -0.72269(16) 0.07112(14) -0.22200(12) 0.0436(13) Uani 1 1 d . . .
O3_2 O -0.70509(16) 0.01399(13) -0.21883(11) 0.0393(12) Uani 1 1 d . . .
O4_2 O -0.74059(17) 0.03573(15) -0.29001(12) 0.0473(13) Uani 1 1 d . . .
O5_2 O -0.76237(17) 0.09680(15) -0.26234(13) 0.0532(14) Uani 1 1 d . . .
O6_2 O -0.80655(17) 0.01292(15) -0.25428(13) 0.0501(14) Uani 1 1 d . A .
O7_2 O -0.71224(16) -0.06624(14) -0.23707(12) 0.0434(13) Uani 1 1 d . . .
O8_2 O -0.71258(17) -0.02693(15) -0.17250(12) 0.0464(13) Uani 1 1 d . . .
O9_2 O -0.63575(16) -0.00038(14) -0.19766(12) 0.0434(13) Uani 1 1 d . . .
C1_2 C -0.6807(3) 0.1676(3) -0.1138(3) 0.065(3) Uani 1 1 d . . .
H1A_2 H -0.6851 0.1875 -0.1232 0.078 Uiso 1 1 calc R . .
C2_2 C -0.7074(3) 0.1212(3) -0.1252(2) 0.064(2) Uani 1 1 d . . .
H2A_2 H -0.7326 0.1046 -0.1432 0.076 Uiso 1 1 calc R . .
C3_2 C -0.6901(3) 0.1036(3) -0.1049(3) 0.071(3) Uani 1 1 d . . .
H3A_2 H -0.7017 0.0731 -0.1067 0.085 Uiso 1 1 calc R . .
C4_2 C -0.6530(3) 0.1391(4) -0.0818(2) 0.074(3) Uani 1 1 d . . .
H4A_2 H -0.6347 0.1366 -0.0654 0.089 Uiso 1 1 calc R . .
C5_2 C -0.6463(3) 0.1805(3) -0.0864(2) 0.064(3) Uani 1 1 d . . .
H15G_2 H -0.6239 0.2097 -0.0739 0.077 Uiso 1 1 calc R . .
C6_2 C -0.5686(3) 0.2238(2) -0.1319(2) 0.060(2) Uani 1 1 d . . .
H6A_2 H -0.5633 0.2451 -0.1115 0.072 Uiso 1 1 calc R . .
C7_2 C -0.6024(3) 0.2098(2) -0.1602(2) 0.060(2) Uani 1 1 d . . .
H7A_2 H -0.6240 0.2196 -0.1618 0.072 Uiso 1 1 calc R . .
C8_2 C -0.5984(4) 0.1784(3) -0.1859(2) 0.073(3) Uani 1 1 d . . .
H8A_2 H -0.6158 0.1644 -0.2079 0.087 Uiso 1 1 calc R . .
C9_2 C -0.5634(4) 0.1722(3) -0.1724(3) 0.082(3) Uani 1 1 d . . .
H9A_2 H -0.5540 0.1522 -0.1835 0.098 Uiso 1 1 calc R . .
C10_2 C -0.5446(3) 0.2011(3) -0.1392(3) 0.074(3) Uani 1 1 d . . .
H10A_2 H -0.5200 0.2042 -0.1246 0.089 Uiso 1 1 calc R . .
C11_2 C -0.5834(3) 0.1180(2) -0.1137(2) 0.062(2) Uani 1 1 d . . .
H11D_2 H -0.5983 0.1047 -0.0965 0.093 Uiso 1 1 calc R . .
H11E_2 H -0.5530 0.1435 -0.1035 0.093 Uiso 1 1 calc R . .
H11F_2 H -0.5803 0.0960 -0.1307 0.093 Uiso 1 1 calc R . .
C12_2 C -0.7070(4) 0.0583(3) -0.3094(2) 0.070(3) Uani 1 1 d . . .
C13_2 C -0.6631(4) 0.0970(3) -0.2871(3) 0.109(4) Uani 1 1 d . . .
H13D_2 H -0.6695 0.1197 -0.2746 0.164 Uiso 1 1 calc R . .
H13E_2 H -0.6404 0.1097 -0.3009 0.164 Uiso 1 1 calc R . .
H13F_2 H -0.6512 0.0864 -0.2714 0.164 Uiso 1 1 calc R . .
C14_2 C -0.7287(4) 0.0732(4) -0.3341(3) 0.116(4) Uani 1 1 d . . .
H14G_2 H -0.7350 0.0959 -0.3214 0.175 Uiso 1 1 calc R . .
H14H_2 H -0.7573 0.0476 -0.3474 0.175 Uiso 1 1 calc R . .
H14I_2 H -0.7074 0.0854 -0.3489 0.175 Uiso 1 1 calc R . .
C15_2 C -0.6967(4) 0.0215(4) -0.3298(3) 0.109(4) Uani 1 1 d . . .
H15H_2 H -0.6830 0.0122 -0.3141 0.163 Uiso 1 1 calc R . .
H15I_2 H -0.6754 0.0337 -0.3446 0.163 Uiso 1 1 calc R . .
H15Y_2 H -0.7253 -0.0042 -0.3431 0.163 Uiso 1 1 calc R . .
C16_2 C -0.7656(3) 0.1331(3) -0.2388(2) 0.065(3) Uani 1 1 d . . .
C17_2 C -0.7949(4) 0.1168(3) -0.2129(3) 0.110(4) Uani 1 1 d . . .
H17G_2 H -0.7802 0.1069 -0.1987 0.165 Uiso 1 1 calc R . .
H17H_2 H -0.8252 0.0921 -0.2243 0.165 Uiso 1 1 calc R . .
H17I_2 H -0.7981 0.1411 -0.1992 0.165 Uiso 1 1 calc R . .
C18_2 C -0.7876(4) 0.1496(3) -0.2626(3) 0.102(4) Uani 1 1 d . . .
H18G_2 H -0.8186 0.1257 -0.2734 0.153 Uiso 1 1 calc R . .
H18H_2 H -0.7689 0.1579 -0.2797 0.153 Uiso 1 1 calc R . .
H18I_2 H -0.7889 0.1754 -0.2495 0.153 Uiso 1 1 calc R . .
C19_2 C -0.7166(4) 0.1689(3) -0.2209(3) 0.116(4) Uani 1 1 d . . .
H19G_2 H -0.7046 0.1570 -0.2065 0.174 Uiso 1 1 calc R . .
H19H_2 H -0.7171 0.1949 -0.2072 0.174 Uiso 1 1 calc R . .
H19I_2 H -0.6971 0.1775 -0.2375 0.174 Uiso 1 1 calc R . .
C20_2 C -0.8516(3) -0.0138(3) -0.2772(3) 0.068(3) Uani 1 1 d . . .
C21A_2 C -0.8533(9) -0.0155(9) -0.3081(7) 0.131(10) Uiso 0.50 1 d P A 1
H21G_2 H -0.8344 -0.0276 -0.3176 0.197 Uiso 0.50 1 calc PR A 1
H21H_2 H -0.8417 0.0145 -0.3105 0.197 Uiso 0.50 1 calc PR A 1
H21I_2 H -0.8850 -0.0345 -0.3200 0.197 Uiso 0.50 1 calc PR A 1
C21B_2 C -0.8867(7) -0.0346(7) -0.2617(5) 0.093(7) Uiso 0.50 1 d P A 2
H21J_2 H -0.8925 -0.0648 -0.2640 0.140 Uiso 0.50 1 calc PR A 2
H21K_2 H -0.9143 -0.0359 -0.2719 0.140 Uiso 0.50 1 calc PR A 2
H21L_2 H -0.8788 -0.0182 -0.2380 0.140 Uiso 0.50 1 calc PR A 2
C22A_2 C -0.8749(6) -0.0608(6) -0.2673(5) 0.071(5) Uiso 0.50 1 d P A 1
H22G_2 H -0.8613 -0.0786 -0.2773 0.106 Uiso 0.50 1 calc PR A 1
H22H_2 H -0.9080 -0.0772 -0.2759 0.106 Uiso 0.50 1 calc PR A 1
H22I_2 H -0.8694 -0.0546 -0.2430 0.106 Uiso 0.50 1 calc PR A 1
C22B_2 C -0.8593(5) 0.0156(5) -0.2996(4) 0.050(4) Uiso 0.50 1 d P A 2
H22J_2 H -0.8445 0.0144 -0.3191 0.074 Uiso 0.50 1 calc PR A 2
H22K_2 H -0.8458 0.0465 -0.2860 0.074 Uiso 0.50 1 calc PR A 2
H22L_2 H -0.8921 0.0034 -0.3070 0.074 Uiso 0.50 1 calc PR A 2
C23A_2 C -0.8829(6) 0.0068(6) -0.2563(5) 0.084(6) Uiso 0.50 1 d P A 1
H23G_2 H -0.8623 0.0337 -0.2383 0.126 Uiso 0.50 1 calc PR A 1
H23H_2 H -0.9050 -0.0155 -0.2468 0.126 Uiso 0.50 1 calc PR A 1
H23I_2 H -0.8992 0.0139 -0.2719 0.126 Uiso 0.50 1 calc PR A 1
C23B_2 C -0.8465(5) -0.0509(5) -0.3071(4) 0.059(5) Uiso 0.50 1 d P A 2
H23J_2 H -0.8142 -0.0427 -0.3056 0.089 Uiso 0.50 1 calc PR A 2
H23K_2 H -0.8582 -0.0511 -0.3291 0.089 Uiso 0.50 1 calc PR A 2
H23L_2 H -0.8641 -0.0805 -0.3040 0.089 Uiso 0.50 1 calc PR A 2
C24_2 C -0.7585(3) -0.0935(2) -0.2583(2) 0.052(2) Uani 1 1 d . . .
C25_2 C -0.7571(3) -0.0768(3) -0.2898(2) 0.071(3) Uani 1 1 d . . .
H25D_2 H -0.7334 -0.0788 -0.3014 0.107 Uiso 1 1 calc R . .
H25E_2 H -0.7503 -0.0459 -0.2830 0.107 Uiso 1 1 calc R . .
H25F_2 H -0.7869 -0.0953 -0.3048 0.107 Uiso 1 1 calc R . .
C26_2 C -0.7668(3) -0.1419(2) -0.2682(2) 0.084(3) Uani 1 1 d . . .
H26D_2 H -0.7432 -0.1431 -0.2804 0.126 Uiso 1 1 calc R . .
H26E_2 H -0.7970 -0.1619 -0.2824 0.126 Uiso 1 1 calc R . .
H26F_2 H -0.7655 -0.1511 -0.2480 0.126 Uiso 1 1 calc R . .
C27_2 C -0.7959(3) -0.0910(3) -0.2388(2) 0.068(3) Uani 1 1 d . . .
H27D_2 H -0.7904 -0.0605 -0.2327 0.103 Uiso 1 1 calc R . .
H27E_2 H -0.7947 -0.1001 -0.2185 0.103 Uiso 1 1 calc R . .
H27F_2 H -0.8262 -0.1109 -0.2529 0.103 Uiso 1 1 calc R . .
C28_2 C -0.7061(3) -0.0479(3) -0.1478(2) 0.053(2) Uani 1 1 d . . .
C29_2 C -0.7530(3) -0.0689(3) -0.1353(2) 0.080(3) Uani 1 1 d . . .
H29G_2 H -0.7596 -0.0455 -0.1248 0.120 Uiso 1 1 calc R . .
H29H_2 H -0.7511 -0.0841 -0.1189 0.120 Uiso 1 1 calc R . .
H29I_2 H -0.7775 -0.0904 -0.1543 0.120 Uiso 1 1 calc R . .
C30_2 C -0.6960(3) -0.0856(3) -0.1644(2) 0.069(3) Uani 1 1 d . . .
H30D_2 H -0.6668 -0.0727 -0.1723 0.104 Uiso 1 1 calc R . .
H30E_2 H -0.7205 -0.1070 -0.1834 0.104 Uiso 1 1 calc R . .
H30F_2 H -0.6942 -0.1007 -0.1480 0.104 Uiso 1 1 calc R . .
C31_2 C -0.6671(3) -0.0127(3) -0.1194(2) 0.067(3) Uani 1 1 d . . .
H31D_2 H -0.6385 -0.0003 -0.1280 0.100 Uiso 1 1 calc R . .
H31E_2 H -0.6641 -0.0261 -0.1021 0.100 Uiso 1 1 calc R . .
H31F_2 H -0.6738 0.0111 -0.1098 0.100 Uiso 1 1 calc R . .
C32_2 C -0.6011(3) 0.0037(3) -0.2192(2) 0.049(2) Uani 1 1 d . . .
C33_2 C -0.5542(3) 0.0404(3) -0.1973(2) 0.067(3) Uani 1 1 d . . .
H33D_2 H -0.5542 0.0686 -0.1906 0.100 Uiso 1 1 calc R . .
H33E_2 H -0.5298 0.0438 -0.2101 0.100 Uiso 1 1 calc R . .
H33F_2 H -0.5490 0.0322 -0.1773 0.100 Uiso 1 1 calc R . .
C34_2 C -0.6022(3) -0.0416(3) -0.2303(2) 0.084(3) Uani 1 1 d . . .
H34D_2 H -0.6320 -0.0643 -0.2440 0.126 Uiso 1 1 calc R . .
H34E_2 H -0.5972 -0.0502 -0.2105 0.126 Uiso 1 1 calc R . .
H34F_2 H -0.5780 -0.0387 -0.2433 0.126 Uiso 1 1 calc R . .
C35_2 C -0.6112(3) 0.0172(3) -0.2496(2) 0.078(3) Uani 1 1 d . . .
H35D_2 H -0.6104 0.0457 -0.2420 0.118 Uiso 1 1 calc R . .
H35E_2 H -0.6416 -0.0056 -0.2625 0.118 Uiso 1 1 calc R . .
H35F_2 H -0.5881 0.0200 -0.2636 0.118 Uiso 1 1 calc R . .
B1_2 B -0.6962(3) 0.0581(3) -0.2050(2) 0.034(2) Uiso 1 1 d . . .
Zr1_3 Zr 1.07694(2) 0.39185(2) 0.763638(19) 0.03742(18) Uani 1 1 d . . .
Si1_3 Si 0.91496(7) 0.33488(6) 0.71891(5) 0.0329(5) Uani 1 1 d . . .
Si2_3 Si 1.00874(8) 0.39402(7) 0.63550(5) 0.0401(5) Uani 1 1 d . . .
O1_3 O 1.03060(16) 0.38043(18) 0.72594(12) 0.0619(16) Uani 1 1 d . . .
O2_3 O 0.95428(15) 0.34891(14) 0.69494(11) 0.0380(12) Uani 1 1 d . . .
O3_3 O 1.02046(16) 0.38591(16) 0.67098(12) 0.0533(14) Uani 1 1 d . . .
O4_3 O 0.86463(16) 0.31193(16) 0.69617(12) 0.0477(13) Uani 1 1 d . . .
O5_3 O 0.92231(16) 0.30197(16) 0.73770(12) 0.0507(14) Uani 1 1 d . . .
O6_3 O 0.92213(17) 0.37806(17) 0.74837(13) 0.0580(15) Uani 1 1 d . . .
O7_3 O 0.9755(2) 0.34869(17) 0.60632(14) 0.0764(19) Uani 1 1 d . . .
O8_3 O 0.9839(2) 0.42419(19) 0.64455(15) 0.0719(18) Uani 1 1 d . . .
O9_3 O 1.0569(2) 0.42059(17) 0.62265(13) 0.0577(15) Uani 1 1 d . . .
C1_3 C 1.0519(7) 0.3207(7) 0.7800(8) 0.181(13) Uani 1 1 d . . .
H1_3 H 1.0341 0.3152 0.7970 0.218 Uiso 1 1 calc R . .
C2_3 C 1.0339(7) 0.3074(5) 0.7475(6) 0.158(9) Uani 1 1 d . . .
H2_3 H 1.0024 0.2928 0.7378 0.190 Uiso 1 1 calc R . .
C3_3 C 1.0716(6) 0.3196(4) 0.7308(6) 0.191(11) Uani 1 1 d . . .
H3_3 H 1.0700 0.3144 0.7073 0.229 Uiso 1 1 calc R . .
C4_3 C 1.1110(8) 0.3403(6) 0.7543(7) 0.176(12) Uani 1 1 d . . .
H4_3 H 1.1407 0.3503 0.7490 0.212 Uiso 1 1 calc R . .
C5_3 C 1.1024(9) 0.3449(7) 0.7866(7) 0.204(12) Uani 1 1 d . . .
H5_3 H 1.1233 0.3595 0.8073 0.244 Uiso 1 1 calc R . .
C6_3 C 1.0597(5) 0.4156(5) 0.8214(3) 0.127(6) Uani 1 1 d . . .
H6_3 H 1.0457 0.3939 0.8329 0.152 Uiso 1 1 calc R . .
C7_3 C 1.0374(4) 0.4258(4) 0.7998(3) 0.098(4) Uani 1 1 d . . .
H7_3 H 1.0051 0.4125 0.7936 0.117 Uiso 1 1 calc R . .
C8_3 C 1.0713(5) 0.4604(3) 0.7883(3) 0.096(4) Uani 1 1 d . . .
H8_3 H 1.0655 0.4742 0.7732 0.115 Uiso 1 1 calc R . .
C9_3 C 1.1153(4) 0.4706(4) 0.8035(3) 0.107(5) Uani 1 1 d . . .
H9_3 H 1.1442 0.4921 0.8006 0.128 Uiso 1 1 calc R . .
C10_3 C 1.1069(5) 0.4425(6) 0.8235(3) 0.146(6) Uani 1 1 d . . .
H10_3 H 1.1299 0.4417 0.8369 0.175 Uiso 1 1 calc R . .
C11_3 C 1.1437(3) 0.4314(3) 0.7442(2) 0.067(3) Uani 1 1 d . . .
H11A_3 H 1.1538 0.4111 0.7328 0.101 Uiso 1 1 calc R . .
H11B_3 H 1.1676 0.4542 0.7630 0.101 Uiso 1 1 calc R . .
H11C_3 H 1.1377 0.4456 0.7285 0.101 Uiso 1 1 calc R . .
C12_3 C 0.8421(3) 0.2789(3) 0.6630(2) 0.055(2) Uani 1 1 d . . .
C13_3 C 0.8562(4) 0.2438(3) 0.6577(3) 0.111(4) Uani 1 1 d . . .
H13A_3 H 0.8893 0.2577 0.6582 0.167 Uiso 1 1 calc R . .
H13B_3 H 0.8400 0.2219 0.6360 0.167 Uiso 1 1 calc R . .
H13C_3 H 0.8484 0.2291 0.6754 0.167 Uiso 1 1 calc R . .
C14_3 C 0.8578(3) 0.3049(3) 0.6368(2) 0.092(3) Uani 1 1 d . . .
H14A_3 H 0.8486 0.3276 0.6404 0.139 Uiso 1 1 calc R . .
H14B_3 H 0.8435 0.2844 0.6144 0.139 Uiso 1 1 calc R . .
H14C_3 H 0.8912 0.3191 0.6392 0.139 Uiso 1 1 calc R . .
C15_3 C 0.7907(3) 0.2602(3) 0.6626(3) 0.112(4) Uani 1 1 d . . .
H15A_3 H 0.7836 0.2844 0.6662 0.168 Uiso 1 1 calc R . .
H15B_3 H 0.7820 0.2457 0.6804 0.168 Uiso 1 1 calc R . .
H15C_3 H 0.7735 0.2384 0.6410 0.168 Uiso 1 1 calc R . .
C16_3 C 0.9002(3) 0.2816(3) 0.7636(2) 0.048(2) Uani 1 1 d . . .
C17_3 C 0.8503(3) 0.2739(3) 0.7615(2) 0.077(3) Uani 1 1 d . . .
H17A_3 H 0.8513 0.3026 0.7665 0.115 Uiso 1 1 calc R . .
H17B_3 H 0.8355 0.2584 0.7778 0.115 Uiso 1 1 calc R . .
H17C_3 H 0.8328 0.2559 0.7390 0.115 Uiso 1 1 calc R . .
C18_3 C 0.8983(3) 0.2365(3) 0.7557(2) 0.087(3) Uani 1 1 d . . .
H18A_3 H 0.8800 0.2183 0.7334 0.131 Uiso 1 1 calc R . .
H18B_3 H 0.8843 0.2213 0.7723 0.131 Uiso 1 1 calc R . .
H18C_3 H 0.9294 0.2411 0.7563 0.131 Uiso 1 1 calc R . .
C19_3 C 0.9288(3) 0.3120(3) 0.7986(2) 0.063(2) Uani 1 1 d . . .
H19A_3 H 0.9292 0.3404 0.8028 0.095 Uiso 1 1 calc R . .
H19B_3 H 0.9602 0.3173 0.7996 0.095 Uiso 1 1 calc R . .
H19C_3 H 0.9151 0.2975 0.8156 0.095 Uiso 1 1 calc R . .
C20_3 C 0.9105(3) 0.4133(3) 0.7470(2) 0.061(2) Uani 1 1 d . . .
C21_3 C 0.9440(4) 0.4537(3) 0.7754(3) 0.141(6) Uani 1 1 d . . .
H21A_3 H 0.9407 0.4460 0.7966 0.212 Uiso 1 1 calc R . .
H21B_3 H 0.9375 0.4779 0.7764 0.212 Uiso 1 1 calc R . .
H21C_3 H 0.9753 0.4631 0.7716 0.212 Uiso 1 1 calc R . .
C22_3 C 0.9142(5) 0.4232(4) 0.7146(3) 0.152(6) Uani 1 1 d . . .
H22A_3 H 0.9455 0.4332 0.7107 0.228 Uiso 1 1 calc R . .
H22B_3 H 0.9066 0.4466 0.7149 0.228 Uiso 1 1 calc R . .
H22C_3 H 0.8929 0.3964 0.6968 0.228 Uiso 1 1 calc R . .
C23_3 C 0.8620(3) 0.3972(4) 0.7546(3) 0.120(4) Uani 1 1 d . . .
H23A_3 H 0.8610 0.3909 0.7763 0.179 Uiso 1 1 calc R . .
H23B_3 H 0.8403 0.3702 0.7372 0.179 Uiso 1 1 calc R . .
H23C_3 H 0.8539 0.4203 0.7554 0.179 Uiso 1 1 calc R . .
C24_3 C 0.9809(3) 0.3148(3) 0.5823(2) 0.057(2) Uani 1 1 d . . .
C25_3 C 0.9315(3) 0.2745(3) 0.5708(2) 0.089(3) Uani 1 1 d . . .
H25A_3 H 0.9208 0.2632 0.5899 0.133 Uiso 1 1 calc R . .
H25B_3 H 0.9314 0.2510 0.5532 0.133 Uiso 1 1 calc R . .
H25C_3 H 0.9111 0.2839 0.5622 0.133 Uiso 1 1 calc R . .
C26_3 C 0.9997(3) 0.3341(3) 0.5536(2) 0.086(3) Uani 1 1 d . . .
H26A_3 H 0.9777 0.3401 0.5427 0.128 Uiso 1 1 calc R . .
H26B_3 H 1.0045 0.3128 0.5372 0.128 Uiso 1 1 calc R . .
H26C_3 H 1.0289 0.3618 0.5624 0.128 Uiso 1 1 calc R . .
C27_3 C 1.0142(4) 0.3046(3) 0.6005(3) 0.119(4) Uani 1 1 d . . .
H27A_3 H 1.0011 0.2922 0.6185 0.178 Uiso 1 1 calc R . .
H27B_3 H 1.0435 0.3320 0.6098 0.178 Uiso 1 1 calc R . .
H27C_3 H 1.0192 0.2831 0.5846 0.178 Uiso 1 1 calc R . .
C28_3 C 0.9652(3) 0.4426(3) 0.6242(2) 0.055(2) Uani 1 1 d . . .
C29_3 C 0.9740(4) 0.4867(3) 0.6480(3) 0.132(5) Uani 1 1 d . . .
H29A_3 H 1.0070 0.5074 0.6543 0.198 Uiso 1 1 calc R . .
H29B_3 H 0.9612 0.4813 0.6681 0.198 Uiso 1 1 calc R . .
H29C_3 H 0.9594 0.4995 0.6367 0.198 Uiso 1 1 calc R . .
C30_3 C 0.9863(4) 0.4501(3) 0.5937(2) 0.103(4) Uani 1 1 d . . .
H30A_3 H 1.0193 0.4706 0.6005 0.155 Uiso 1 1 calc R . .
H30B_3 H 0.9726 0.4630 0.5817 0.155 Uiso 1 1 calc R . .
H30C_3 H 0.9808 0.4218 0.5791 0.155 Uiso 1 1 calc R . .
C31_3 C 0.9147(4) 0.4114(4) 0.6149(3) 0.104(4) Uani 1 1 d . . .
H31A_3 H 0.9019 0.4071 0.6351 0.156 Uiso 1 1 calc R . .
H31B_3 H 0.9087 0.3829 0.6004 0.156 Uiso 1 1 calc R . .
H31C_3 H 0.9004 0.4240 0.6030 0.156 Uiso 1 1 calc R . .
C32_3 C 1.1027(3) 0.4530(3) 0.6398(2) 0.054(2) Uani 1 1 d . . .
C33_3 C 1.1274(3) 0.4308(4) 0.6521(3) 0.099(4) Uani 1 1 d . . .
H33A_3 H 1.1272 0.4087 0.6331 0.149 Uiso 1 1 calc R . .
H33B_3 H 1.1117 0.4162 0.6685 0.149 Uiso 1 1 calc R . .
H33C_3 H 1.1591 0.4533 0.6625 0.149 Uiso 1 1 calc R . .
C34_3 C 1.1270(3) 0.4763(3) 0.6130(2) 0.078(3) Uani 1 1 d . . .
H34A_3 H 1.1109 0.4904 0.6054 0.117 Uiso 1 1 calc R . .
H34B_3 H 1.1265 0.4542 0.5940 0.117 Uiso 1 1 calc R . .
H34C_3 H 1.1588 0.4989 0.6231 0.117 Uiso 1 1 calc R . .
C35_3 C 1.1029(3) 0.4882(3) 0.6700(2) 0.092(3) Uani 1 1 d . . .
H35A_3 H 1.0871 0.5024 0.6621 0.139 Uiso 1 1 calc R . .
H35B_3 H 1.1345 0.5108 0.6804 0.139 Uiso 1 1 calc R . .
H35C_3 H 1.0871 0.4736 0.6864 0.139 Uiso 1 1 calc R . .
B1_3 B 1.0021(3) 0.3722(3) 0.6980(2) 0.035(2) Uiso 1 1 d . . .
Zr1_4 Zr 0.96066(2) 0.59200(2) 0.546078(18) 0.03689(18) Uani 1 1 d . . .
Si1_4 Si 1.12326(7) 0.68341(7) 0.58213(5) 0.0377(5) Uani 1 1 d . . .
Si2_4 Si 1.04455(8) 0.77349(6) 0.58762(5) 0.0419(5) Uani 1 1 d . . .
O1_4 O 1.01676(15) 0.65008(14) 0.54671(11) 0.0376(12) Uani 1 1 d . . .
O2_4 O 1.08864(15) 0.70482(14) 0.58336(11) 0.0389(12) Uani 1 1 d . . .
O3_4 O 1.03703(17) 0.72622(15) 0.56305(12) 0.0501(14) Uani 1 1 d . . .
O4_4 O 1.17609(17) 0.72355(16) 0.59717(12) 0.0464(13) Uani 1 1 d . . .
O5_4 O 1.10409(16) 0.64682(15) 0.60379(12) 0.0451(13) Uani 1 1 d . . .
O6_4 O 1.12243(16) 0.65742(14) 0.54373(11) 0.0400(12) Uani 1 1 d . . .
O7_4 O 1.03950(17) 0.76521(15) 0.62435(11) 0.0464(13) Uani 1 1 d . . .
O8_4 O 1.09597(19) 0.81590(18) 0.59076(16) 0.0738(18) Uani 1 1 d . . .
O9_4 O 1.0080(2) 0.78591(16) 0.57245(13) 0.0577(15) Uani 1 1 d . . .
C1_4 C 0.9529(9) 0.5670(7) 0.5987(4) 0.164(11) Uani 1 1 d . . .
H1B_4 H 0.9580 0.5430 0.5986 0.196 Uiso 1 1 calc R . .
C2_4 C 0.9848(4) 0.6123(6) 0.6085(2) 0.098(4) Uani 1 1 d . . .
H2B_4 H 1.0167 0.6251 0.6162 0.117 Uiso 1 1 calc R . .
C3_4 C 0.9628(6) 0.6346(3) 0.6052(2) 0.081(3) Uani 1 1 d . . .
H3B_4 H 0.9766 0.6660 0.6104 0.098 Uiso 1 1 calc R . .
C4_4 C 0.9189(5) 0.6062(8) 0.5934(3) 0.120(6) Uani 1 1 d . . .
H4B_4 H 0.8961 0.6137 0.5887 0.144 Uiso 1 1 calc R . .
C5_4 C 0.9121(7) 0.5653(5) 0.5894(4) 0.156(10) Uani 1 1 d . . .
H5B_4 H 0.8834 0.5388 0.5813 0.187 Uiso 1 1 calc R . .
C6_4 C 0.9271(3) 0.5087(2) 0.5146(2) 0.066(3) Uani 1 1 d . . .
H6B_4 H 0.9010 0.4872 0.5208 0.079 Uiso 1 1 calc R . .
C7_4 C 0.9735(3) 0.5252(2) 0.5289(2) 0.060(2) Uani 1 1 d . . .
H7B_4 H 0.9836 0.5166 0.5461 0.072 Uiso 1 1 calc R . .
C8_4 C 1.0019(3) 0.5567(3) 0.5128(2) 0.059(2) Uani 1 1 d . . .
H8B_4 H 1.0343 0.5731 0.5174 0.071 Uiso 1 1 calc R . .
C9_4 C 0.9732(4) 0.5594(3) 0.4889(2) 0.061(3) Uani 1 1 d . . .
H9B_4 H 0.9833 0.5779 0.4745 0.073 Uiso 1 1 calc R . .
C10_4 C 0.9260(3) 0.5294(3) 0.4895(2) 0.063(2) Uani 1 1 d . . .
H10B_4 H 0.8997 0.5246 0.4760 0.075 Uiso 1 1 calc R . .
C11_4 C 0.9057(3) 0.6025(2) 0.5190(2) 0.059(2) Uani 1 1 d . . .
H11G_4 H 0.9049 0.6281 0.5331 0.088 Uiso 1 1 calc R . .
H11H_4 H 0.8755 0.5759 0.5151 0.088 Uiso 1 1 calc R . .
H11I_4 H 0.9136 0.6079 0.4977 0.088 Uiso 1 1 calc R . .
C12_4 C 1.1969(3) 0.7622(3) 0.6271(2) 0.054(2) Uani 1 1 d . . .
C13_4 C 1.2479(3) 0.7747(3) 0.6359(2) 0.078(3) Uani 1 1 d . . .
H13G_4 H 1.2493 0.7502 0.6417 0.117 Uiso 1 1 calc R . .
H13H_4 H 1.2637 0.8014 0.6550 0.117 Uiso 1 1 calc R . .
H13I_4 H 1.2627 0.7803 0.6166 0.117 Uiso 1 1 calc R . .
C14_4 C 1.1714(3) 0.7492(3) 0.6558(2) 0.069(3) Uani 1 1 d . . .
H14J_4 H 1.1395 0.7415 0.6497 0.103 Uiso 1 1 calc R . .
H14K_4 H 1.1861 0.7743 0.6761 0.103 Uiso 1 1 calc R . .
H14L_4 H 1.1724 0.7236 0.6598 0.103 Uiso 1 1 calc R . .
C15_4 C 1.1936(3) 0.8005(2) 0.6179(2) 0.067(3) Uani 1 1 d . . .
H15J_4 H 1.1613 0.7921 0.6125 0.100 Uiso 1 1 calc R . .
H15K_4 H 1.2082 0.8063 0.5985 0.100 Uiso 1 1 calc R . .
H15L_4 H 1.2091 0.8273 0.6369 0.100 Uiso 1 1 calc R . .
C16_4 C 1.1189(3) 0.6156(3) 0.6106(2) 0.060(2) Uani 1 1 d . . .
C17_4 C 1.1723(3) 0.6384(3) 0.6152(2) 0.076(3) Uani 1 1 d . . .
H17J_4 H 1.1820 0.6442 0.5943 0.114 Uiso 1 1 calc R . .
H17K_4 H 1.1823 0.6188 0.6213 0.114 Uiso 1 1 calc R . .
H17L_4 H 1.1860 0.6665 0.6330 0.114 Uiso 1 1 calc R . .
C18_4 C 1.1024(4) 0.6060(3) 0.6430(2) 0.092(3) Uani 1 1 d . . .
H18J_4 H 1.0690 0.5917 0.6394 0.138 Uiso 1 1 calc R . .
H18K_4 H 1.1157 0.6339 0.6609 0.138 Uiso 1 1 calc R . .
H18L_4 H 1.1120 0.5862 0.6492 0.138 Uiso 1 1 calc R . .
C19_4 C 1.0968(3) 0.5740(3) 0.5812(2) 0.078(3) Uani 1 1 d . . .
H19J_4 H 1.0635 0.5601 0.5786 0.117 Uiso 1 1 calc R . .
H19K_4 H 1.1064 0.5532 0.5852 0.117 Uiso 1 1 calc R . .
H19L_4 H 1.1064 0.5819 0.5608 0.117 Uiso 1 1 calc R . .
C20\_4 C 1.1421(3) 0.6760(2) 0.51607(19) 0.044(2) Uani 1 1 d . . .
C21_4 C 1.1938(3) 0.6903(3) 0.5210(2) 0.064(2) Uani 1 1 d . . .
H21M_4 H 1.1974 0.6646 0.5211 0.095 Uiso 1 1 calc R . .
H21N_4 H 1.2097 0.7133 0.5423 0.095 Uiso 1 1 calc R . .
H21O_4 H 1.2070 0.7021 0.5027 0.095 Uiso 1 1 calc R . .
C22_4 C 1.1356(3) 0.7167(3) 0.5159(2) 0.063(2) Uani 1 1 d . . .
H22M_4 H 1.1029 0.7072 0.5128 0.095 Uiso 1 1 calc R . .
H22N_4 H 1.1486 0.7286 0.4976 0.095 Uiso 1 1 calc R . .
H22O_4 H 1.1513 0.7398 0.5372 0.095 Uiso 1 1 calc R . .
C23_4 C 1.1150(3) 0.6382(3) 0.4838(2) 0.077(3) Uani 1 1 d . . .
H23M_4 H 1.1193 0.6130 0.4841 0.115 Uiso 1 1 calc R . .
H23N_4 H 1.1260 0.6486 0.4645 0.115 Uiso 1 1 calc R . .
H23O_4 H 1.0824 0.6290 0.4821 0.115 Uiso 1 1 calc R . .
C24_4 C 1.0463(3) 0.7947(3) 0.65802(19) 0.051(2) Uani 1 1 d . . .
C25_4 C 1.0975(3) 0.8179(3) 0.6738(2) 0.066(3) Uani 1 1 d . . .
H25G_4 H 1.1158 0.8382 0.6613 0.099 Uiso 1 1 calc R . .
H25H_4 H 1.1067 0.7956 0.6730 0.099 Uiso 1 1 calc R . .
H25I_4 H 1.1023 0.8347 0.6970 0.099 Uiso 1 1 calc R . .
C26_4 C 1.0300(3) 0.8281(3) 0.6563(2) 0.065(3) Uani 1 1 d . . .
H26G_4 H 1.0491 0.8483 0.6440 0.098 Uiso 1 1 calc R . .
H26H_4 H 1.0326 0.8453 0.6790 0.098 Uiso 1 1 calc R . .
H26I_4 H 0.9981 0.8120 0.6449 0.098 Uiso 1 1 calc R . .
C27_4 C 1.0163(3) 0.7620(3) 0.6777(2) 0.079(3) Uani 1 1 d . . .
H27G_4 H 0.9839 0.7475 0.6674 0.119 Uiso 1 1 calc R . .
H27H_4 H 1.0208 0.7786 0.7010 0.119 Uiso 1 1 calc R . .
H27I_4 H 1.0253 0.7395 0.6769 0.119 Uiso 1 1 calc R . .
C28_4 C 1.1148(4) 0.8452(3) 0.5695(4) 0.094(4) Uani 1 1 d . . .
C29_4 C 1.0999(5) 0.8192(4) 0.5318(3) 0.131(5) Uani 1 1 d . . .
H29J_4 H 1.0665 0.8048 0.5255 0.196 Uiso 1 1 calc R . .
H29K_4 H 1.1092 0.7967 0.5275 0.196 Uiso 1 1 calc R . .
H29L_4 H 1.1144 0.8398 0.5185 0.196 Uiso 1 1 calc R . .
C30_4 C 1.0993(4) 0.8804(3) 0.5765(3) 0.114(4) Uani 1 1 d . . .
H30G_4 H 1.1088 0.8967 0.6003 0.171 Uiso 1 1 calc R . .
H30H_4 H 1.0659 0.8656 0.5704 0.171 Uiso 1 1 calc R . .
H30I_4 H 1.1134 0.9012 0.5633 0.171 Uiso 1 1 calc R . .
C31_4 C 1.1677(5) 0.8680(4) 0.5794(5) 0.214(9) Uani 1 1 d . . .
H31G_4 H 1.1772 0.8844 0.6032 0.321 Uiso 1 1 calc R . .
H31H_4 H 1.1823 0.8886 0.5661 0.321 Uiso 1 1 calc R . .
H31I_4 H 1.1770 0.8454 0.5751 0.321 Uiso 1 1 calc R . .
C32_4 C 0.9588(3) 0.7590(3) 0.5577(2) 0.058(2) Uani 1 1 d . . .
C33_4 C 0.9546(3) 0.7353(3) 0.5206(2) 0.091(3) Uani 1 1 d . . .
H33G_4 H 0.9647 0.7135 0.5195 0.136 Uiso 1 1 calc R . .
H33H_4 H 0.9737 0.7572 0.5095 0.136 Uiso 1 1 calc R . .
H33I_4 H 0.9226 0.7201 0.5094 0.136 Uiso 1 1 calc R . .
C34_4 C 0.9427(3) 0.7938(3) 0.5599(3) 0.092(3) Uani 1 1 d . . .
H34G_4 H 0.9455 0.8085 0.5834 0.138 Uiso 1 1 calc R . .
H34H_4 H 0.9107 0.7787 0.5487 0.138 Uiso 1 1 calc R . .
H34I_4 H 0.9618 0.8159 0.5490 0.138 Uiso 1 1 calc R . .
C35_4 C 0.9330(3) 0.7258(3) 0.5765(2) 0.084(3) Uani 1 1 d . . .
H35G_4 H 0.9442 0.7047 0.5744 0.126 Uiso 1 1 calc R . .
H35H_4 H 0.9003 0.7099 0.5670 0.126 Uiso 1 1 calc R . .
H35I_4 H 0.9379 0.7414 0.6001 0.126 Uiso 1 1 calc R . .
B1_4 B 1.0474(3) 0.6927(3) 0.5648(2) 0.033(2) Uiso 1 1 d . . .
Zr1_5 Zr 0.06801(2) 0.38199(2) 0.255240(17) 0.03585(17) Uani 1 1 d . . .
Si1_5 Si -0.09226(7) 0.32574(6) 0.20759(5) 0.0326(5) Uani 1 1 d . . .
Si2_5 Si 0.00775(7) 0.39256(6) 0.13003(5) 0.0328(5) Uani 1 1 d . . .
O1_5 O 0.02247(15) 0.38096(14) 0.22163(11) 0.0399(12) Uani 1 1 d . . .
O2_5 O -0.05180(14) 0.34201(13) 0.18448(10) 0.0296(11) Uani 1 1 d . . .
O3_5 O 0.01765(14) 0.38147(14) 0.16465(11) 0.0350(11) Uani 1 1 d . . .
O4_5 O -0.08696(15) 0.28930(14) 0.22339(12) 0.0402(12) Uani 1 1 d . . .
O5_5 O -0.08615(16) 0.36664(15) 0.23900(12) 0.0438(13) Uani 1 1 d . . .
O6_5 O -0.14251(16) 0.30469(15) 0.18380(12) 0.0437(13) Uani 1 1 d . . .
O7_5 O -0.02792(16) 0.34891(14) 0.09986(11) 0.0427(13) Uani 1 1 d . . .
O8_5 O -0.01490(15) 0.42485(13) 0.14033(10) 0.0343(11) Uani 1 1 d . . .
O9_5 O 0.05667(17) 0.41686(15) 0.11685(11) 0.0414(12) Uani 1 1 d . . .
C1_5 C 0.0404(4) 0.3038(3) 0.2596(3) 0.072(3) Uani 1 1 d . . .
H1_5 H 0.0224 0.2956 0.2762 0.086 Uiso 1 1 calc R . .
C2_5 C 0.0237(3) 0.2980(2) 0.2269(3) 0.063(3) Uani 1 1 d . . .
H2_5 H -0.0076 0.2849 0.2175 0.075 Uiso 1 1 calc R . .
C3_5 C 0.0606(3) 0.3146(3) 0.2097(2) 0.064(3) Uani 1 1 d . . .
H3_5 H 0.0586 0.3146 0.1870 0.077 Uiso 1 1 calc R . .
C4_5 C 0.1018(3) 0.3313(3) 0.2334(3) 0.075(3) Uani 1 1 d . . .
H4_5 H 0.1319 0.3446 0.2288 0.090 Uiso 1 1 calc R . .
C5_5 C 0.0905(4) 0.3248(3) 0.2645(3) 0.085(3) Uani 1 1 d . . .
H5_5 H 0.1110 0.3324 0.2843 0.101 Uiso 1 1 calc R . .
C6_5 C 0.0500(6) 0.3904(4) 0.3140(2) 0.097(4) Uani 1 1 d . . .
H6_5 H 0.0338 0.3638 0.3202 0.116 Uiso 1 1 calc R . .
C7_5 C 0.0312(4) 0.4114(4) 0.2990(3) 0.086(3) Uani 1 1 d . . .
H7_5 H -0.0005 0.4017 0.2944 0.103 Uiso 1 1 calc R . .
C8_5 C 0.0653(5) 0.4480(4) 0.2920(3) 0.090(3) Uani 1 1 d . . .
H8_5 H 0.0607 0.4664 0.2808 0.108 Uiso 1 1 calc R . .
C9_5 C 0.1082(5) 0.4535(4) 0.3042(3) 0.108(4) Uani 1 1 d . . .
H9_5 H 0.1375 0.4765 0.3034 0.129 Uiso 1 1 calc R . .
C10_5 C 0.0986(6) 0.4176(6) 0.3179(3) 0.120(5) Uani 1 1 d . . .
H10_5 H 0.1208 0.4125 0.3280 0.144 Uiso 1 1 calc R . .
C11_5 C 0.1352(3) 0.4274(3) 0.2388(2) 0.076(3) Uani 1 1 d . . .
H11A_5 H 0.1326 0.4162 0.2147 0.114 Uiso 1 1 calc R . .
H11B_5 H 0.1610 0.4275 0.2507 0.114 Uiso 1 1 calc R . .
H11C_5 H 0.1402 0.4577 0.2442 0.114 Uiso 1 1 calc R . .
C12_5 C -0.1646(3) 0.2738(3) 0.1499(2) 0.051(2) Uani 1 1 d . . .
C13_5 C -0.2169(3) 0.2536(3) 0.1490(3) 0.095(3) Uani 1 1 d . . .
H13A_5 H -0.2260 0.2366 0.1653 0.142 Uiso 1 1 calc R . .
H13B_5 H -0.2334 0.2340 0.1266 0.142 Uiso 1 1 calc R . .
H13C_5 H -0.2243 0.2775 0.1545 0.142 Uiso 1 1 calc R . .
C14_5 C -0.1508(3) 0.2368(3) 0.1441(2) 0.082(3) Uani 1 1 d . . .
H14A_5 H -0.1612 0.2203 0.1605 0.124 Uiso 1 1 calc R . .
H14B_5 H -0.1174 0.2507 0.1465 0.124 Uiso 1 1 calc R . .
H14C_5 H -0.1650 0.2165 0.1215 0.124 Uiso 1 1 calc R . .
C15_5 C -0.1491(3) 0.3007(3) 0.1247(2) 0.071(3) Uani 1 1 d . . .
H15A_5 H -0.1161 0.3131 0.1257 0.107 Uiso 1 1 calc R . .
H15B_5 H -0.1562 0.3249 0.1300 0.107 Uiso 1 1 calc R . .
H15C_5 H -0.1652 0.2813 0.1021 0.107 Uiso 1 1 calc R . .
C16_5 C -0.1095(3) 0.2677(3) 0.2488(2) 0.049(2) Uani 1 1 d . . .
C17_5 C -0.1595(3) 0.2598(3) 0.2465(2) 0.079(3) Uani 1 1 d . . .
H17A_5 H -0.1586 0.2884 0.2516 0.118 Uiso 1 1 calc R . .
H17B_5 H -0.1744 0.2441 0.2626 0.118 Uiso 1 1 calc R . .
H17C_5 H -0.1768 0.2419 0.2239 0.118 Uiso 1 1 calc R . .
C18_5 C -0.1098(3) 0.2233(2) 0.2408(2) 0.068(3) Uani 1 1 d . . .
H18A_5 H -0.1278 0.2048 0.2185 0.102 Uiso 1 1 calc R . .
H18B_5 H -0.1233 0.2078 0.2574 0.102 Uiso 1 1 calc R . .
H18C_5 H -0.0783 0.2288 0.2415 0.102 Uiso 1 1 calc R . .
C19_5 C -0.0812(3) 0.2985(3) 0.2837(2) 0.064(2) Uani 1 1 d . . .
H19A_5 H -0.0819 0.3264 0.2877 0.095 Uiso 1 1 calc R . .
H19B_5 H -0.0495 0.3048 0.2847 0.095 Uiso 1 1 calc R . .
H19C_5 H -0.0945 0.2840 0.3008 0.095 Uiso 1 1 calc R . .
C20_5 C -0.0948(3) 0.4040(2) 0.2399(2) 0.048(2) Uani 1 1 d . . .
C21_5 C -0.1419(4) 0.3895(4) 0.2498(4) 0.167(7) Uani 1 1 d . . .
H21A_5 H -0.1419 0.3823 0.2710 0.250 Uiso 1 1 calc R . .
H21B_5 H -0.1653 0.3633 0.2324 0.250 Uiso 1 1 calc R . .
H21C_5 H -0.1488 0.4137 0.2522 0.250 Uiso 1 1 calc R . .
C22_5 C -0.0915(6) 0.4154(4) 0.2088(3) 0.175(7) Uani 1 1 d . . .
H22A_5 H -0.1146 0.3900 0.1909 0.262 Uiso 1 1 calc R . .
H22B_5 H -0.0610 0.4236 0.2036 0.262 Uiso 1 1 calc R . .
H22C_5 H -0.0968 0.4406 0.2108 0.262 Uiso 1 1 calc R . .
C23_5 C -0.0602(4) 0.4413(3) 0.2685(3) 0.150(6) Uani 1 1 d . . .
H23A_5 H -0.0637 0.4319 0.2890 0.224 Uiso 1 1 calc R . .
H23B_5 H -0.0649 0.4669 0.2714 0.224 Uiso 1 1 calc R . .
H23C_5 H -0.0294 0.4496 0.2639 0.224 Uiso 1 1 calc R . .
C24_5 C -0.0221(3) 0.3127(2) 0.07708(19) 0.046(2) Uani 1 1 d . . .
C25_5 C -0.0712(3) 0.2718(2) 0.06569(19) 0.055(2) Uani 1 1 d . . .
H25A_5 H -0.0907 0.2791 0.0533 0.082 Uiso 1 1 calc R . .
H25B_5 H -0.0838 0.2639 0.0853 0.082 Uiso 1 1 calc R . .
H25C_5 H -0.0700 0.2467 0.0513 0.082 Uiso 1 1 calc R . .
C26_5 C -0.0023(3) 0.3291(3) 0.0469(2) 0.074(3) Uani 1 1 d . . .
H26A_5 H -0.0235 0.3350 0.0349 0.111 Uiso 1 1 calc R . .
H26B_5 H 0.0017 0.3063 0.0318 0.111 Uiso 1 1 calc R . .
H26C_5 H 0.0273 0.3565 0.0551 0.111 Uiso 1 1 calc R . .
C27_5 C 0.0102(3) 0.3031(2) 0.0969(2) 0.062(2) Uani 1 1 d . . .
H27A_5 H 0.0407 0.3294 0.1037 0.093 Uiso 1 1 calc R . .
H27B_5 H 0.0121 0.2782 0.0828 0.093 Uiso 1 1 calc R . .
H27C_5 H -0.0018 0.2955 0.1168 0.093 Uiso 1 1 calc R . .
C28_5 C -0.0329(3) 0.4443(2) 0.12010(18) 0.0419(19) Uani 1 1 d . . .
C29_5 C -0.0404(5) 0.4780(4) 0.1438(2) 0.133(5) Uani 1 1 d . . .
H29A_5 H -0.0616 0.4636 0.1580 0.200 Uiso 1 1 calc R . .
H29B_5 H -0.0534 0.4908 0.1310 0.200 Uiso 1 1 calc R . .
H29C_5 H -0.0111 0.5017 0.1578 0.200 Uiso 1 1 calc R . .
C30_5 C -0.0007(4) 0.4652(5) 0.0982(4) 0.191(8) Uani 1 1 d . . .
H30A_5 H 0.0038 0.4427 0.0830 0.286 Uiso 1 1 calc R . .
H30B_5 H 0.0288 0.4887 0.1120 0.286 Uiso 1 1 calc R . .
H30C_5 H -0.0134 0.4778 0.0851 0.286 Uiso 1 1 calc R . .
C31_5 C -0.0776(4) 0.4085(3) 0.0983(3) 0.166(7) Uani 1 1 d . . .
H31A_5 H -0.0994 0.3944 0.1122 0.249 Uiso 1 1 calc R . .
H31B_5 H -0.0728 0.3863 0.0831 0.249 Uiso 1 1 calc R . .
H31C_5 H -0.0899 0.4215 0.0852 0.249 Uiso 1 1 calc R . .
C32_5 C 0.1034(3) 0.4490(2) 0.1349(2) 0.045(2) Uani 1 1 d . . .
C33_5 C 0.1255(3) 0.4227(3) 0.1451(2) 0.065(2) Uani 1 1 d . . .
H33A_5 H 0.1256 0.4024 0.1250 0.097 Uiso 1 1 calc R . .
H33B_5 H 0.1077 0.4057 0.1596 0.097 Uiso 1 1 calc R . .
H33C_5 H 0.1569 0.4435 0.1570 0.097 Uiso 1 1 calc R . .
C34_5 C 0.1286(3) 0.4741(3) 0.1098(2) 0.070(3) Uani 1 1 d . . .
H34A_5 H 0.1283 0.4529 0.0901 0.105 Uiso 1 1 calc R . .
H34B_5 H 0.1603 0.4962 0.1205 0.105 Uiso 1 1 calc R . .
H34C_5 H 0.1131 0.4891 0.1031 0.105 Uiso 1 1 calc R . .
C35_5 C 0.1031(3) 0.4814(2) 0.1667(2) 0.065(3) Uani 1 1 d . . .
H35A_5 H 0.0892 0.4979 0.1602 0.097 Uiso 1 1 calc R . .
H35B_5 H 0.1346 0.5022 0.1786 0.097 Uiso 1 1 calc R . .
H35C_5 H 0.0853 0.4645 0.1813 0.097 Uiso 1 1 calc R . .
B1_5 B -0.0038(3) 0.3683(2) 0.1914(2) 0.0272(18) Uiso 1 1 d . . .
Zr1_6 Zr -0.04318(3) -0.14115(2) -0.198170(18) 0.03979(18) Uani 1 1 d . . .
Si1_6 Si 0.08004(7) -0.07123(7) -0.10270(6) 0.0434(6) Uani 1 1 d . . .
Si2_6 Si -0.01655(8) 0.00773(7) -0.12770(6) 0.0423(6) Uani 1 1 d . . .
O1_6 O -0.01151(17) -0.08424(15) -0.15967(13) 0.0505(14) Uani 1 1 d . . .
O2_6 O 0.03476(16) -0.06495(15) -0.10652(12) 0.0466(13) Uani 1 1 d . . .
O3_6 O 0.00047(17) -0.02234(16) -0.11391(12) 0.0519(14) Uani 1 1 d . . .
O4_6 O 0.11657(16) -0.04788(14) -0.12603(12) 0.0458(13) Uani 1 1 d . . .
O5_6 O 0.06063(17) -0.12532(15) -0.11597(14) 0.0543(15) Uani 1 1 d . . .
O6_6 O 0.10587(17) -0.04961(16) -0.06310(13) 0.0557(14) Uani 1 1 d . . .
O7_6 O 0.01410(18) 0.02371(16) -0.15622(14) 0.0576(15) Uani 1 1 d . . .
O8_6 O -0.00896(18) 0.04975(16) -0.09698(13) 0.0581(15) Uani 1 1 d . . .
O9_6 O -0.07092(18) -0.01905(17) -0.14430(14) 0.0618(15) Uani 1 1 d . . .
C1_6 C -0.0661(5) -0.2122(3) -0.1805(4) 0.088(4) Uani 1 1 d . . .
H1G_6 H -0.0467 -0.2247 -0.1827 0.106 Uiso 1 1 calc R . .
C2_6 C -0.0631(3) -0.1802(3) -0.1520(2) 0.067(3) Uani 1 1 d . . .
H2G_6 H -0.0412 -0.1667 -0.1319 0.081 Uiso 1 1 calc R . .
C3_6 C -0.0989(5) -0.1724(4) -0.1593(4) 0.088(4) Uani 1 1 d . . .
H3G_6 H -0.1061 -0.1526 -0.1450 0.106 Uiso 1 1 calc R . .
C4_6 C -0.1222(4) -0.1991(6) -0.1917(5) 0.120(5) Uani 1 1 d . . .
H4G_6 H -0.1483 -0.2008 -0.2031 0.144 Uiso 1 1 calc R . .
C5_6 C -0.1014(6) -0.2221(4) -0.2042(3) 0.108(5) Uani 1 1 d . . .
H5A_6 H -0.1100 -0.2420 -0.2259 0.130 Uiso 1 1 calc R . .
C6_6 C -0.0226(4) -0.1770(5) -0.2510(3) 0.094(4) Uani 1 1 d . . .
H6G_6 H -0.0449 -0.2059 -0.2642 0.113 Uiso 1 1 calc R . .
C7_6 C 0.0112(4) -0.1660(4) -0.2239(3) 0.073(3) Uani 1 1 d . . .
H7G_6 H 0.0154 -0.1870 -0.2160 0.088 Uiso 1 1 calc R . .
C8_6 C 0.0381(3) -0.1190(4) -0.2101(3) 0.071(3) Uani 1 1 d . . .
H8G_6 H 0.0631 -0.1035 -0.1919 0.085 Uiso 1 1 calc R . .
C9_6 C 0.0200(4) -0.0998(4) -0.2290(4) 0.096(4) Uani 1 1 d . . .
H9G_6 H 0.0300 -0.0691 -0.2254 0.115 Uiso 1 1 calc R . .
C10_6 C -0.0165(5) -0.1363(6) -0.2546(3) 0.100(4) Uani 1 1 d . . .
H10G_6 H -0.0340 -0.1335 -0.2714 0.120 Uiso 1 1 calc R . .
C11_6 C -0.0944(3) -0.1284(3) -0.2269(2) 0.068(3) Uani 1 1 d . . .
H11V_6 H -0.1070 -0.1143 -0.2109 0.103 Uiso 1 1 calc R . .
H11W_6 H -0.1193 -0.1567 -0.2413 0.103 Uiso 1 1 calc R . .
H11X_6 H -0.0785 -0.1089 -0.2406 0.103 Uiso 1 1 calc R . .
C12_6 C 0.1492(3) -0.0009(3) -0.1250(2) 0.052(2) Uani 1 1 d . . .
C13_6 C 0.1876(3) 0.0185(3) -0.0958(2) 0.070(3) Uani 1 1 d . . .
H13V_6 H 0.2038 0.0016 -0.0988 0.106 Uiso 1 1 calc R . .
H13W_6 H 0.1752 0.0171 -0.0752 0.106 Uiso 1 1 calc R . .
H13X_6 H 0.2090 0.0495 -0.0945 0.106 Uiso 1 1 calc R . .
C14_6 C 0.1666(3) -0.0031(3) -0.1578(2) 0.086(3) Uani 1 1 d . . .
H14Y_6 H 0.1830 -0.0198 -0.1592 0.129 Uiso 1 1 calc R . .
H14Z_6 H 0.1874 0.0270 -0.1588 0.129 Uiso 1 1 calc R . .
H15Z_6 H 0.1407 -0.0181 -0.1764 0.129 Uiso 1 1 calc R . .
C15_6 C 0.1228(3) 0.0252(3) -0.1212(3) 0.117(5) Uani 1 1 d . . .
H16A_6 H 0.1121 0.0259 -0.0998 0.175 Uiso 1 1 calc R . .
H16B_6 H 0.0965 0.0105 -0.1395 0.175 Uiso 1 1 calc R . .
H16C_6 H 0.1431 0.0556 -0.1219 0.175 Uiso 1 1 calc R . .
C16_6 C 0.0859(3) -0.1508(3) -0.1192(3) 0.066(3) Uani 1 1 d . . .
C17_6 C 0.1237(5) -0.1323(5) -0.0900(3) 0.188(8) Uani 1 1 d . . .
H17Y_6 H 0.1417 -0.1000 -0.0854 0.281 Uiso 1 1 calc R . .
H17Z_6 H 0.1435 -0.1452 -0.0950 0.281 Uiso 1 1 calc R . .
H18Y_6 H 0.1106 -0.1396 -0.0703 0.281 Uiso 1 1 calc R . .
C18_6 C 0.1055(4) -0.1486(4) -0.1510(3) 0.117(4) Uani 1 1 d . . .
H18Z_6 H 0.1322 -0.1191 -0.1476 0.175 Uiso 1 1 calc R . .
H19Y_6 H 0.0822 -0.1540 -0.1692 0.175 Uiso 1 1 calc R . .
H19Z_6 H 0.1147 -0.1712 -0.1569 0.175 Uiso 1 1 calc R . .
C19A_6 C 0.0552(6) -0.1921(6) -0.1112(5) 0.073(5) Uiso 0.50 1 d P . .
H19A_6 H 0.0603 -0.1871 -0.0869 0.110 Uiso 0.50 1 calc PR . .
H19B_6 H 0.0616 -0.2155 -0.1221 0.110 Uiso 0.50 1 calc PR . .
H19C_6 H 0.0233 -0.2011 -0.1192 0.110 Uiso 0.50 1 calc PR . .
C19B_6 C 0.0458(6) -0.2020(6) -0.1375(5) 0.075(6) Uiso 0.50 1 d P . .
H19D_6 H 0.0259 -0.2136 -0.1218 0.112 Uiso 0.50 1 calc PR . .
H19E_6 H 0.0599 -0.2203 -0.1448 0.112 Uiso 0.50 1 calc PR . .
H19F_6 H 0.0277 -0.2027 -0.1569 0.112 Uiso 0.50 1 calc PR . .
C20_6 C 0.0880(3) -0.0498(3) -0.0316(2) 0.057(2) Uani 1 1 d . . .
C21_6 C 0.1270(3) -0.0421(3) -0.0051(2) 0.097(3) Uani 1 1 d . . .
H24D_6 H 0.1324 -0.0673 -0.0109 0.146 Uiso 1 1 calc R . .
H24E_6 H 0.1183 -0.0392 0.0169 0.146 Uiso 1 1 calc R . .
H24F_6 H 0.1551 -0.0149 -0.0047 0.146 Uiso 1 1 calc R . .
C22_6 C 0.0787(3) -0.0098(3) -0.0230(2) 0.078(3) Uani 1 1 d . . .
H24G_6 H 0.0540 -0.0152 -0.0399 0.117 Uiso 1 1 calc R . .
H24H_6 H 0.1065 0.0176 -0.0226 0.117 Uiso 1 1 calc R . .
H24I_6 H 0.0697 -0.0068 -0.0010 0.117 Uiso 1 1 calc R . .
C23_6 C 0.0439(3) -0.0929(3) -0.0355(2) 0.074(3) Uani 1 1 d . . .
H24J_6 H 0.0499 -0.1178 -0.0408 0.111 Uiso 1 1 calc R . .
H24K_6 H 0.0213 -0.0971 -0.0535 0.111 Uiso 1 1 calc R . .
H24L_6 H 0.0320 -0.0918 -0.0145 0.111 Uiso 1 1 calc R . .
C24_6 C 0.0099(3) 0.0421(3) -0.1833(2) 0.060(2) Uani 1 1 d . . .
C25_6 C 0.0586(4) 0.0667(4) -0.1906(3) 0.108(4) Uani 1 1 d . . .
H25Y_6 H 0.0698 0.0457 -0.1974 0.162 Uiso 1 1 calc R . .
H25Z_6 H 0.0790 0.0902 -0.1705 0.162 Uiso 1 1 calc R . .
H26V_6 H 0.0581 0.0799 -0.2087 0.162 Uiso 1 1 calc R . .
C26_6 C -0.0085(3) 0.0750(3) -0.1725(2) 0.076(3) Uani 1 1 d . . .
H26W_6 H 0.0126 0.0994 -0.1531 0.113 Uiso 1 1 calc R . .
H26X_6 H -0.0387 0.0593 -0.1667 0.113 Uiso 1 1 calc R . .
H26Y_6 H -0.0108 0.0869 -0.1910 0.113 Uiso 1 1 calc R . .
C27_6 C -0.0236(4) 0.0035(3) -0.2140(2) 0.106(4) Uani 1 1 d . . .
H27V_6 H -0.0121 -0.0172 -0.2208 0.160 Uiso 1 1 calc R . .
H27W_6 H -0.0260 0.0155 -0.2325 0.160 Uiso 1 1 calc R . .
H27X_6 H -0.0539 -0.0121 -0.2082 0.160 Uiso 1 1 calc R . .
C28_6 C 0.0288(3) 0.0840(3) -0.0695(2) 0.060(2) Uani 1 1 d . . .
C29_6 C 0.0367(4) 0.0644(3) -0.0438(3) 0.103(4) Uani 1 1 d . . .
H29V_6 H 0.0083 0.0492 -0.0354 0.154 Uiso 1 1 calc R . .
H29W_6 H 0.0606 0.0880 -0.0252 0.154 Uiso 1 1 calc R . .
H29X_6 H 0.0464 0.0431 -0.0537 0.154 Uiso 1 1 calc R . .
C30_6 C 0.0120(3) 0.1166(3) -0.0549(2) 0.081(3) Uani 1 1 d . . .
H30V_6 H -0.0159 0.1011 -0.0461 0.121 Uiso 1 1 calc R . .
H30W_6 H 0.0055 0.1279 -0.0725 0.121 Uiso 1 1 calc R . .
H30X_6 H 0.0358 0.1413 -0.0369 0.121 Uiso 1 1 calc R . .
C31_6 C 0.0730(3) 0.1085(3) -0.0834(2) 0.085(3) Uani 1 1 d . . .
H31V_6 H 0.0837 0.0878 -0.0927 0.127 Uiso 1 1 calc R . .
H31W_6 H 0.0967 0.1333 -0.0653 0.127 Uiso 1 1 calc R . .
H31X_6 H 0.0664 0.1199 -0.1010 0.127 Uiso 1 1 calc R . .
C32_6 C -0.1129(3) -0.0324(3) -0.1290(2) 0.061(2) Uani 1 1 d . . .
C33_6 C -0.1522(3) -0.0700(3) -0.1571(2) 0.093(3) Uani 1 1 d . . .
H33V_6 H -0.1472 -0.0954 -0.1632 0.140 Uiso 1 1 calc R . .
H33W_6 H -0.1530 -0.0594 -0.1767 0.140 Uiso 1 1 calc R . .
H33X_6 H -0.1814 -0.0791 -0.1493 0.140 Uiso 1 1 calc R . .
C34_6 C -0.1201(3) 0.0093(3) -0.1186(3) 0.103(4) Uani 1 1 d . . .
H34V_6 H -0.0949 0.0328 -0.1008 0.154 Uiso 1 1 calc R . .
H34W_6 H -0.1492 0.0006 -0.1106 0.154 Uiso 1 1 calc R . .
H34X_6 H -0.1207 0.0203 -0.1380 0.154 Uiso 1 1 calc R . .
C35_6 C -0.1080(3) -0.0474(3) -0.0985(2) 0.090(3) Uani 1 1 d . . .
H35V_6 H -0.1036 -0.0731 -0.1051 0.135 Uiso 1 1 calc R . .
H35W_6 H -0.1358 -0.0556 -0.0887 0.135 Uiso 1 1 calc R . .
H35X_6 H -0.0815 -0.0232 -0.0819 0.135 Uiso 1 1 calc R . .
B1_6 B 0.0076(3) -0.0582(3) -0.1278(2) 0.035(2) Uiso 1 1 d . . .
Zr1_7 Zr -0.02569(3) 0.59765(2) 0.048014(18) 0.04022(19) Uani 1 1 d . . .
Si1_7 Si 0.13983(7) 0.69018(7) 0.08364(6) 0.0430(6) Uani 1 1 d . . .
Si2_7 Si 0.02637(7) 0.76271(6) 0.08547(5) 0.0374(5) Uani 1 1 d . . .
O1_7 O 0.02862(16) 0.65846(16) 0.05124(12) 0.0465(13) Uani 1 1 d . . .
O2_7 O 0.10418(17) 0.70983(14) 0.08405(12) 0.0459(13) Uani 1 1 d . . .
O3_7 O 0.05175(19) 0.73404(18) 0.08441(17) 0.081(2) Uani 1 1 d . . .
O4_7 O 0.19216(16) 0.73277(16) 0.09747(13) 0.0509(14) Uani 1 1 d . . .
O5_7 O 0.12320(16) 0.65653(15) 0.10728(12) 0.0453(13) Uani 1 1 d . . .
O6_7 O 0.13972(16) 0.66195(15) 0.04628(12) 0.0439(13) Uani 1 1 d . . .
O7_7 O 0.04877(19) 0.80447(18) 0.12014(14) 0.0698(17) Uani 1 1 d . . .
O8_7 O 0.03097(17) 0.78465(17) 0.05475(13) 0.0519(14) Uani 1 1 d . . .
O9_7 O -0.02831(16) 0.73036(16) 0.08492(12) 0.0502(14) Uani 1 1 d . . .
C1_7 C -0.0172(3) 0.5822(3) 0.1041(2) 0.058(2) Uani 1 1 d . . .
H1C_7 H 0.0014 0.5695 0.1069 0.069 Uiso 1 1 calc R . .
C2_7 C -0.0025(3) 0.6280(3) 0.11238(19) 0.057(2) Uani 1 1 d . . .
H2C_7 H 0.0278 0.6514 0.1219 0.069 Uiso 1 1 calc R . .
C3_7 C -0.0404(3) 0.6332(3) 0.1040(2) 0.054(2) Uani 1 1 d . . .
H3C_7 H -0.0399 0.6606 0.1067 0.064 Uiso 1 1 calc R . .
C4_7 C -0.0799(3) 0.5897(3) 0.0907(2) 0.063(2) Uani 1 1 d . . .
H4C_7 H -0.1101 0.5833 0.0832 0.076 Uiso 1 1 calc R . .
C5_7 C -0.0655(3) 0.5583(3) 0.0908(2) 0.059(2) Uani 1 1 d . . .
H5C_7 H -0.0843 0.5269 0.0835 0.071 Uiso 1 1 calc R . .
C6_7 C -0.0543(4) 0.5166(3) 0.0130(3) 0.086(4) Uani 1 1 d . . .
H6C_7 H -0.0814 0.4936 0.0169 0.103 Uiso 1 1 calc R . .
C7_7 C -0.0096(3) 0.5328(3) 0.0302(2) 0.060(2) Uani 1 1 d . . .
H7C_7 H -0.0014 0.5230 0.0473 0.072 Uiso 1 1 calc R . .
C8_7 C 0.0211(3) 0.5672(3) 0.0165(2) 0.058(2) Uani 1 1 d . . .
H8C_7 H 0.0534 0.5842 0.0228 0.069 Uiso 1 1 calc R . .
C9_7 C -0.0057(5) 0.5707(4) -0.0080(2) 0.079(3) Uani 1 1 d . . .
H9C_7 H 0.0060 0.5911 -0.0209 0.094 Uiso 1 1 calc R . .
C10_7 C -0.0529(5) 0.5397(5) -0.0109(3) 0.102(5) Uani 1 1 d . . .
H10C_7 H -0.0780 0.5354 -0.0256 0.122 Uiso 1 1 calc R . .
C11_7 C -0.0820(3) 0.6057(3) 0.0213(2) 0.061(2) Uani 1 1 d . . .
H11J_7 H -0.0858 0.6288 0.0363 0.091 Uiso 1 1 calc R . .
H11K_7 H -0.1109 0.5775 0.0154 0.091 Uiso 1 1 calc R . .
H11L_7 H -0.0730 0.6142 0.0010 0.091 Uiso 1 1 calc R . .
C12_7 C 0.2121(3) 0.7754(2) 0.1242(2) 0.054(2) Uani 1 1 d . . .
C13_7 C 0.2636(3) 0.7919(3) 0.1311(2) 0.088(3) Uani 1 1 d . . .
H13J_7 H 0.2762 0.7969 0.1109 0.132 Uiso 1 1 calc R . .
H13K_7 H 0.2687 0.7697 0.1378 0.132 Uiso 1 1 calc R . .
H13L_7 H 0.2789 0.8198 0.1492 0.132 Uiso 1 1 calc R . .
C14_7 C 0.1904(3) 0.7670(3) 0.15515(19) 0.059(2) Uani 1 1 d . . .
H14M_7 H 0.1576 0.7566 0.1498 0.088 Uiso 1 1 calc R . .
H14N_7 H 0.2050 0.7947 0.1734 0.088 Uiso 1 1 calc R . .
H14O_7 H 0.1948 0.7445 0.1620 0.088 Uiso 1 1 calc R . .
C15_7 C 0.2026(3) 0.8077(3) 0.1112(2) 0.082(3) Uani 1 1 d . . .
H15M_7 H 0.1696 0.7966 0.1070 0.123 Uiso 1 1 calc R . .
H15N_7 H 0.2143 0.8105 0.0904 0.123 Uiso 1 1 calc R . .
H15O_7 H 0.2179 0.8369 0.1279 0.123 Uiso 1 1 calc R . .
C16_7 C 0.1387(3) 0.6256(2) 0.11358(19) 0.046(2) Uani 1 1 d . . .
C17_7 C 0.1909(3) 0.6456(3) 0.1135(2) 0.062(2) Uani 1 1 d . . .
H17M_7 H 0.1969 0.6488 0.0913 0.093 Uiso 1 1 calc R . .
H17N_7 H 0.2009 0.6259 0.1191 0.093 Uiso 1 1 calc R . .
H17O_7 H 0.2076 0.6748 0.1301 0.093 Uiso 1 1 calc R . .
C18_7 C 0.1279(3) 0.6201(3) 0.1485(2) 0.083(3) Uani 1 1 d . . .
H18M_7 H 0.0949 0.6075 0.1480 0.125 Uiso 1 1 calc R . .
H18N_7 H 0.1444 0.6491 0.1653 0.125 Uiso 1 1 calc R . .
H18O_7 H 0.1376 0.6001 0.1542 0.125 Uiso 1 1 calc R . .
C19_7 C 0.1106(3) 0.5809(2) 0.0862(2) 0.061(2) Uani 1 1 d . . .
H19M_7 H 0.1179 0.5850 0.0644 0.092 Uiso 1 1 calc R . .
H19N_7 H 0.0779 0.5701 0.0858 0.092 Uiso 1 1 calc R . .
H19O_7 H 0.1182 0.5592 0.0910 0.092 Uiso 1 1 calc R . .
C20_7 C 0.1593(3) 0.6769(3) 0.0178(2) 0.051(2) Uani 1 1 d . . .
C21_7 C 0.2112(3) 0.6937(3) 0.0245(2) 0.060(2) Uani 1 1 d . . .
H21P_7 H 0.2163 0.6699 0.0278 0.089 Uiso 1 1 calc R . .
H21Q_7 H 0.2259 0.7191 0.0446 0.089 Uiso 1 1 calc R . .
H21R_7 H 0.2243 0.7028 0.0053 0.089 Uiso 1 1 calc R . .
C22_7 C 0.1489(3) 0.7131(3) 0.0124(2) 0.081(3) Uani 1 1 d . . .
H22P_7 H 0.1157 0.7011 0.0082 0.122 Uiso 1 1 calc R . .
H22Q_7 H 0.1614 0.7223 -0.0069 0.122 Uiso 1 1 calc R . .
H22R_7 H 0.1630 0.7387 0.0323 0.122 Uiso 1 1 calc R . .
C23_7 C 0.1360(3) 0.6356(3) -0.0124(2) 0.076(3) Uani 1 1 d . . .
H23P_7 H 0.1429 0.6131 -0.0086 0.115 Uiso 1 1 calc R . .
H23Q_7 H 0.1472 0.6437 -0.0324 0.115 Uiso 1 1 calc R . .
H23R_7 H 0.1028 0.6238 -0.0157 0.115 Uiso 1 1 calc R . .
C24_7 C 0.0598(3) 0.8071(3) 0.15508(19) 0.052(2) Uani 1 1 d . . .
C25_7 C 0.1097(3) 0.8196(3) 0.1636(2) 0.092(3) Uani 1 1 d . . .
H25J_7 H 0.1293 0.8467 0.1575 0.138 Uiso 1 1 calc R . .
H25K_7 H 0.1140 0.7954 0.1511 0.138 Uiso 1 1 calc R . .
H25L_7 H 0.1179 0.8246 0.1876 0.138 Uiso 1 1 calc R . .
C26_7 C 0.0529(4) 0.8459(3) 0.1745(3) 0.110(4) Uani 1 1 d . . .
H26J_7 H 0.0735 0.8731 0.1689 0.166 Uiso 1 1 calc R . .
H26K_7 H 0.0597 0.8504 0.1985 0.166 Uiso 1 1 calc R . .
H26L_7 H 0.0211 0.8385 0.1681 0.166 Uiso 1 1 calc R . .
C27_7 C 0.0265(3) 0.7637(3) 0.1642(2) 0.073(3) Uani 1 1 d . . .
H27J_7 H 0.0305 0.7392 0.1522 0.109 Uiso 1 1 calc R . .
H27K_7 H -0.0052 0.7565 0.1579 0.109 Uiso 1 1 calc R . .
H27L_7 H 0.0333 0.7685 0.1883 0.109 Uiso 1 1 calc R . .
C28_7 C 0.0697(3) 0.8140(3) 0.0414(2) 0.048(2) Uani 1 1 d . . .
C29_7 C 0.1017(3) 0.7940(3) 0.0333(2) 0.066(3) Uani 1 1 d . . .
H29M_7 H 0.1157 0.7932 0.0540 0.099 Uiso 1 1 calc R . .
H29N_7 H 0.1258 0.8126 0.0225 0.099 Uiso 1 1 calc R . .
H29O_7 H 0.0838 0.7639 0.0182 0.099 Uiso 1 1 calc R . .
C30_7 C 0.0476(3) 0.8154(3) 0.0086(2) 0.067(3) Uani 1 1 d . . .
H30J_7 H 0.0275 0.8279 0.0136 0.100 Uiso 1 1 calc R . .
H30K_7 H 0.0297 0.7852 -0.0065 0.100 Uiso 1 1 calc R . .
H30L_7 H 0.0717 0.8339 -0.0022 0.100 Uiso 1 1 calc R . .
C31_7 C 0.0964(3) 0.8603(3) 0.0662(2) 0.068(3) Uani 1 1 d . . .
H31J_7 H 0.0758 0.8723 0.0710 0.102 Uiso 1 1 calc R . .
H31K_7 H 0.1212 0.8799 0.0565 0.102 Uiso 1 1 calc R . .
H31L_7 H 0.1093 0.8585 0.0869 0.102 Uiso 1 1 calc R . .
C32_7 C -0.0690(3) 0.7347(3) 0.0787(3) 0.065(3) Uani 1 1 d . . .
C33_7 C -0.1064(3) 0.6994(3) 0.0920(3) 0.095(4) Uani 1 1 d . . .
H33J_7 H -0.1137 0.6697 0.0787 0.142 Uiso 1 1 calc R . .
H33K_7 H -0.1340 0.7021 0.0903 0.142 Uiso 1 1 calc R . .
H33L_7 H -0.0954 0.7038 0.1154 0.142 Uiso 1 1 calc R . .
C34_7 C -0.0813(3) 0.7274(3) 0.0417(3) 0.102(4) Uani 1 1 d . . .
H34J_7 H -0.0879 0.6976 0.0295 0.152 Uiso 1 1 calc R . .
H34K_7 H -0.0556 0.7495 0.0343 0.152 Uiso 1 1 calc R . .
H34L_7 H -0.1084 0.7303 0.0374 0.152 Uiso 1 1 calc R . .
C35_7 C -0.0578(3) 0.7821(3) 0.1005(3) 0.101(4) Uani 1 1 d . . .
H35J_7 H -0.0341 0.8050 0.0924 0.151 Uiso 1 1 calc R . .
H35K_7 H -0.0470 0.7862 0.1239 0.151 Uiso 1 1 calc R . .
H35L_7 H -0.0856 0.7846 0.0989 0.151 Uiso 1 1 calc R . .
B1_7 B 0.0605(3) 0.6988(3) 0.0716(2) 0.039(2) Uiso 1 1 d . . .
Zr1_8 Zr 0.25069(2) -0.40793(2) -0.095586(18) 0.03346(17) Uani 1 1 d . . .
Si1_8 Si 0.41605(6) -0.33389(6) -0.03714(5) 0.0332(5) Uani 1 1 d . . .
Si2_8 Si 0.31634(7) -0.39155(6) 0.03735(5) 0.0322(5) Uani 1 1 d . . .
O1_8 O 0.29304(16) -0.37390(15) -0.05105(11) 0.0426(12) Uani 1 1 d . . .
O2_8 O 0.37027(15) -0.34250(14) -0.02199(12) 0.0454(13) Uani 1 1 d . . .
O3_8 O 0.30641(16) -0.37682(15) 0.00467(12) 0.0431(13) Uani 1 1 d . . .
O4_8 O 0.46076(17) -0.28966(16) -0.01414(13) 0.0556(15) Uani 1 1 d . . .
O5_8 O 0.41720(16) -0.38077(15) -0.04277(13) 0.0548(15) Uani 1 1 d . . .
O6_8 O 0.41314(18) -0.32898(17) -0.07514(14) 0.0624(15) Uani 1 1 d . . .
O7_8 O 0.33991(15) -0.42252(14) 0.02475(11) 0.0359(12) Uani 1 1 d . . .
O8_8 O 0.35169(16) -0.34931(14) 0.06937(11) 0.0415(12) Uani 1 1 d . . .
O9_8 O 0.26730(16) -0.41815(14) 0.04959(11) 0.0370(12) Uani 1 1 d . . .
C1_8 C 0.2889(5) -0.4364(3) -0.1383(3) 0.072(3) Uani 1 1 d . . .
H1_8 H 0.3044 -0.4177 -0.1517 0.087 Uiso 1 1 calc R . .
C2_8 C 0.3081(3) -0.4358(3) -0.1077(3) 0.075(3) Uani 1 1 d . . .
H2_8 H 0.3390 -0.4170 -0.0966 0.090 Uiso 1 1 calc R . .
C3_8 C 0.2725(6) -0.4685(4) -0.0963(3) 0.085(4) Uani 1 1 d . . .
H3_8 H 0.2753 -0.4753 -0.0759 0.102 Uiso 1 1 calc R . .
C4_8 C 0.2325(4) -0.4892(3) -0.1205(4) 0.078(3) Uani 1 1 d . . .
H4_8 H 0.2035 -0.5126 -0.1196 0.094 Uiso 1 1 calc R . .
C5_8 C 0.2431(4) -0.4691(4) -0.1457(3) 0.071(3) Uani 1 1 d . . .
H5_8 H 0.2222 -0.4765 -0.1652 0.086 Uiso 1 1 calc R . .
C6_8 C 0.2249(6) -0.3859(4) -0.1434(3) 0.096(4) Uani 1 1 d . . .
H6_8 H 0.2181 -0.4044 -0.1655 0.115 Uiso 1 1 calc R . .
C7_8 C 0.2669(5) -0.3517(4) -0.1286(4) 0.080(3) Uani 1 1 d . . .
H7_8 H 0.2938 -0.3425 -0.1382 0.096 Uiso 1 1 calc R . .
C8_8 C 0.2636(5) -0.3322(3) -0.0970(4) 0.094(4) Uani 1 1 d . . .
H8_8 H 0.2878 -0.3074 -0.0807 0.113 Uiso 1 1 calc R . .
C9_8 C 0.2168(8) -0.3563(6) -0.0931(4) 0.116(7) Uani 1 1 d . . .
H9_8 H 0.2037 -0.3505 -0.0743 0.139 Uiso 1 1 calc R . .
C10_8 C 0.1942(4) -0.3910(5) -0.1239(6) 0.125(7) Uani 1 1 d . . .
H10_8 H 0.1630 -0.4136 -0.1293 0.150 Uiso 1 1 calc R . .
C11_8 C 0.1834(3) -0.4503(3) -0.0779(2) 0.063(2) Uani 1 1 d . . .
H11A_8 H 0.1807 -0.4789 -0.0779 0.094 Uiso 1 1 calc R . .
H11B_8 H 0.1571 -0.4553 -0.0930 0.094 Uiso 1 1 calc R . .
H11C_8 H 0.1839 -0.4345 -0.0552 0.094 Uiso 1 1 calc R . .
C12_8 C 0.4745(3) -0.2661(3) 0.0225(2) 0.051(2) Uani 1 1 d . . .
C13_8 C 0.5260(3) -0.2353(3) 0.0273(2) 0.075(3) Uani 1 1 d . . .
H13A_8 H 0.5322 -0.2155 0.0130 0.112 Uiso 1 1 calc R . .
H13B_8 H 0.5409 -0.2530 0.0212 0.112 Uiso 1 1 calc R . .
H13C_8 H 0.5378 -0.2176 0.0507 0.112 Uiso 1 1 calc R . .
C14_8 C 0.4631(3) -0.2970(3) 0.0436(2) 0.065(3) Uani 1 1 d . . .
H14A_8 H 0.4299 -0.3162 0.0399 0.097 Uiso 1 1 calc R . .
H14B_8 H 0.4745 -0.2798 0.0672 0.097 Uiso 1 1 calc R . .
H14C_8 H 0.4775 -0.3152 0.0376 0.097 Uiso 1 1 calc R . .
C15_8 C 0.4474(3) -0.2396(3) 0.0300(2) 0.069(3) Uani 1 1 d . . .
H15A_8 H 0.4547 -0.2193 0.0161 0.104 Uiso 1 1 calc R . .
H15B_8 H 0.4563 -0.2227 0.0537 0.104 Uiso 1 1 calc R . .
H15C_8 H 0.4144 -0.2607 0.0249 0.104 Uiso 1 1 calc R . .
C16_8 C 0.4476(3) -0.3957(2) -0.05776(19) 0.041(2) Uani 1 1 d . . .
C17_8 C 0.4971(3) -0.3576(3) -0.0487(2) 0.070(3) Uani 1 1 d . . .
H17A_8 H 0.5065 -0.3463 -0.0243 0.105 Uiso 1 1 calc R . .
H17B_8 H 0.4995 -0.3336 -0.0577 0.105 Uiso 1 1 calc R . .
H17C_8 H 0.5172 -0.3682 -0.0582 0.105 Uiso 1 1 calc R . .
C18_8 C 0.4436(3) -0.4335(3) -0.0433(3) 0.099(4) Uani 1 1 d . . .
H18A_8 H 0.4537 -0.4220 -0.0190 0.149 Uiso 1 1 calc R . .
H18B_8 H 0.4628 -0.4450 -0.0532 0.149 Uiso 1 1 calc R . .
H18C_8 H 0.4116 -0.4575 -0.0486 0.149 Uiso 1 1 calc R . .
C19_8 C 0.4319(3) -0.4143(4) -0.0954(2) 0.096(4) Uani 1 1 d . . .
H19A_8 H 0.4001 -0.4386 -0.1006 0.145 Uiso 1 1 calc R . .
H19B_8 H 0.4515 -0.4254 -0.1052 0.145 Uiso 1 1 calc R . .
H19C_8 H 0.4339 -0.3908 -0.1048 0.145 Uiso 1 1 calc R . .
C20_8 C 0.4247(3) -0.2895(3) -0.0881(2) 0.055(2) Uani 1 1 d . . .
C21_8 C 0.4768(3) -0.2599(3) -0.0830(2) 0.074(3) Uani 1 1 d . . .
H21A_8 H 0.4900 -0.2771 -0.0948 0.111 Uiso 1 1 calc R . .
H21B_8 H 0.4898 -0.2490 -0.0591 0.111 Uiso 1 1 calc R . .
H21C_8 H 0.4840 -0.2346 -0.0919 0.111 Uiso 1 1 calc R . .
C22_8 C 0.4027(3) -0.2633(3) -0.0697(2) 0.088(3) Uani 1 1 d . . .
H22A_8 H 0.3695 -0.2828 -0.0733 0.132 Uiso 1 1 calc R . .
H22B_8 H 0.4094 -0.2380 -0.0785 0.132 Uiso 1 1 calc R . .
H22C_8 H 0.4152 -0.2524 -0.0458 0.132 Uiso 1 1 calc R . .
C23_8 C 0.4032(3) -0.3114(3) -0.1264(2) 0.066(3) Uani 1 1 d . . .
H23A_8 H 0.3700 -0.3302 -0.1290 0.099 Uiso 1 1 calc R . .
H23B_8 H 0.4163 -0.3296 -0.1365 0.099 Uiso 1 1 calc R . .
H23C_8 H 0.4099 -0.2882 -0.1374 0.099 Uiso 1 1 calc R . .
C24_8 C 0.3587(3) -0.4434(2) 0.04269(17) 0.0379(18) Uani 1 1 d . . .
C25_8 C 0.4107(3) -0.4120(3) 0.0532(2) 0.060(2) Uani 1 1 d . . .
H25A_8 H 0.4242 -0.4066 0.0333 0.090 Uiso 1 1 calc R . .
H25B_8 H 0.4242 -0.4256 0.0645 0.090 Uiso 1 1 calc R . .
H25C_8 H 0.4168 -0.3838 0.0684 0.090 Uiso 1 1 calc R . .
C26_8 C 0.3363(3) -0.4527(2) 0.07349(18) 0.054(2) Uani 1 1 d . . .
H26A_8 H 0.3033 -0.4727 0.0663 0.081 Uiso 1 1 calc R . .
H26B_8 H 0.3420 -0.4247 0.0888 0.081 Uiso 1 1 calc R . .
H26C_8 H 0.3495 -0.4665 0.0849 0.081 Uiso 1 1 calc R . .
C27_8 C 0.3477(3) -0.4877(2) 0.0169(2) 0.062(2) Uani 1 1 d . . .
H27A_8 H 0.3144 -0.5072 0.0106 0.093 Uiso 1 1 calc R . .
H27B_8 H 0.3611 -0.5024 0.0269 0.093 Uiso 1 1 calc R . .
H27C_8 H 0.3605 -0.4814 -0.0030 0.093 Uiso 1 1 calc R . .
C28_8 C 0.3434(3) -0.3195(2) 0.09628(19) 0.049(2) Uani 1 1 d . . .
C29_8 C 0.3110(3) -0.3061(3) 0.0813(2) 0.063(3) Uani 1 1 d . . .
H29A_8 H 0.3250 -0.2903 0.0649 0.095 Uiso 1 1 calc R . .
H29B_8 H 0.3058 -0.2867 0.0991 0.095 Uiso 1 1 calc R . .
H29C_8 H 0.2818 -0.3328 0.0702 0.095 Uiso 1 1 calc R . .
C30_8 C 0.3237(3) -0.3446(3) 0.1226(2) 0.074(3) Uani 1 1 d . . .
H30A_8 H 0.3455 -0.3523 0.1314 0.111 Uiso 1 1 calc R . .
H30B_8 H 0.2946 -0.3718 0.1121 0.111 Uiso 1 1 calc R . .
H30C_8 H 0.3187 -0.3256 0.1409 0.111 Uiso 1 1 calc R . .
C31_8 C 0.3920(3) -0.2780(2) 0.1113(2) 0.062(2) Uani 1 1 d . . .
H31A_8 H 0.4120 -0.2872 0.1208 0.093 Uiso 1 1 calc R . .
H31B_8 H 0.3895 -0.2562 0.1288 0.093 Uiso 1 1 calc R . .
H31C_8 H 0.4050 -0.2647 0.0936 0.093 Uiso 1 1 calc R . .
C32_8 C 0.2215(3) -0.4525(2) 0.03099(19) 0.0428(19) Uani 1 1 d . . .
C33_8 C 0.2242(3) -0.4860(2) 0.0011(2) 0.060(2) Uani 1 1 d . . .
H33A_8 H 0.2403 -0.4705 -0.0148 0.090 Uiso 1 1 calc R . .
H33B_8 H 0.1932 -0.5095 -0.0101 0.090 Uiso 1 1 calc R . .
H33C_8 H 0.2409 -0.4991 0.0095 0.090 Uiso 1 1 calc R . .
C34_8 C 0.1962(3) -0.4761(2) 0.0566(2) 0.063(3) Uani 1 1 d . . .
H34A_8 H 0.1948 -0.4545 0.0751 0.094 Uiso 1 1 calc R . .
H34B_8 H 0.2127 -0.4892 0.0652 0.094 Uiso 1 1 calc R . .
H34C_8 H 0.1651 -0.4996 0.0456 0.094 Uiso 1 1 calc R . .
C35_8 C 0.1978(3) -0.4283(3) 0.0187(2) 0.063(2) Uani 1 1 d . . .
H35A_8 H 0.2142 -0.4135 0.0026 0.095 Uiso 1 1 calc R . .
H35B_8 H 0.1983 -0.4062 0.0379 0.095 Uiso 1 1 calc R . .
H35C_8 H 0.1660 -0.4501 0.0080 0.095 Uiso 1 1 calc R . .
B1_8 B 0.3222(3) -0.3649(2) -0.0235(2) 0.0265(18) Uiso 1 1 d . . .
Zr1_9 Zr -0.04209(3) -0.15077(2) 0.296120(18) 0.04230(19) Uani 1 1 d . . .
Si1_9 Si 0.08664(8) -0.07481(8) 0.39628(6) 0.0530(6) Uani 1 1 d . . .
Si2_9 Si 0.00725(8) 0.01423(7) 0.38954(6) 0.0477(6) Uani 1 1 d . . .
O1_9 O -0.00299(18) -0.09748(16) 0.33492(12) 0.0560(15) Uani 1 1 d . B .
O2_9 O 0.0533(2) -0.0567(2) 0.38503(15) 0.090(2) Uani 1 1 d . B .
O3_9 O -0.00010(18) -0.03497(16) 0.37121(13) 0.0605(16) Uani 1 1 d . B .
O4A_9 O 0.1407(3) -0.0313(3) 0.4126(3) 0.043(3) Uiso 0.50 1 d P B 1
O5A_9 O 0.0891(4) -0.1091(3) 0.3624(3) 0.052(3) Uiso 0.50 1 d P B 1
O6A_9 O 0.0672(4) -0.0976(3) 0.4236(3) 0.046(3) Uiso 0.50 1 d P B 1
O4B_9 O 0.1321(5) -0.0479(4) 0.3869(4) 0.083(4) Uiso 0.50 1 d P B 2
O5B_9 O 0.0653(3) -0.1286(3) 0.3746(3) 0.049(3) Uiso 0.50 1 d P B 2
O6B_9 O 0.0941(5) -0.0708(4) 0.4360(3) 0.079(4) Uiso 0.50 1 d P B 2
O7_9 O 0.03572(19) 0.05084(17) 0.36931(15) 0.0626(16) Uani 1 1 d . . .
O8_9 O 0.0379(2) 0.03198(16) 0.42715(13) 0.0644(16) Uani 1 1 d . . .
O9_9 O -0.04392(19) 0.00941(16) 0.38956(13) 0.0564(15) Uani 1 1 d . . .
C1_9 C -0.0721(3) -0.2213(3) 0.3143(2) 0.066(3) Uani 1 1 d . . .
H1H_9 H -0.0531 -0.2342 0.3134 0.079 Uiso 1 1 calc R . .
C2_9 C -0.0701(5) -0.1896(3) 0.3417(3) 0.102(4) Uani 1 1 d . . .
H2H_9 H -0.0501 -0.1778 0.3626 0.123 Uiso 1 1 calc R . .
C3_9 C -0.1030(5) -0.1782(4) 0.3333(4) 0.116(6) Uani 1 1 d . . .
H3H_9 H -0.1090 -0.1571 0.3470 0.140 Uiso 1 1 calc R . .
C4_9 C -0.1254(4) -0.2045(4) 0.2998(4) 0.096(4) Uani 1 1 d . . .
H4H_9 H -0.1494 -0.2040 0.2874 0.115 Uiso 1 1 calc R . .
C5_9 C -0.1063(3) -0.2314(3) 0.2883(3) 0.069(3) Uani 1 1 d . . .
H5G_9 H -0.1149 -0.2523 0.2670 0.083 Uiso 1 1 calc R . .
C6_9 C -0.0274(3) -0.1909(3) 0.2418(2) 0.056(2) Uani 1 1 d . . .
H6H_9 H -0.0505 -0.2199 0.2294 0.067 Uiso 1 1 calc R . .
C7_9 C 0.0072(3) -0.1808(3) 0.2679(2) 0.065(3) Uani 1 1 d . . .
H7H_9 H 0.0111 -0.2015 0.2766 0.078 Uiso 1 1 calc R . .
C8_9 C 0.0358(3) -0.1331(3) 0.2789(2) 0.054(2) Uani 1 1 d . . .
H8H_9 H 0.0623 -0.1167 0.2959 0.064 Uiso 1 1 calc R . .
C9_9 C 0.0172(3) -0.1150(3) 0.2599(2) 0.054(2) Uani 1 1 d . . .
H9H_9 H 0.0292 -0.0843 0.2621 0.065 Uiso 1 1 calc R . .
C10_9 C -0.0223(3) -0.1505(3) 0.2369(2) 0.055(2) Uani 1 1 d . . .
H10H_9 H -0.0416 -0.1479 0.2213 0.066 Uiso 1 1 calc R . .
C11_9 C -0.0834(3) -0.1218(3) 0.2743(2) 0.068(3) Uani 1 1 d . . .
H11Y_9 H -0.0912 -0.1055 0.2927 0.101 Uiso 1 1 calc R . .
H11Z_9 H -0.1115 -0.1462 0.2594 0.101 Uiso 1 1 calc R . .
H12A_9 H -0.0646 -0.1017 0.2618 0.101 Uiso 1 1 calc R . .
C12_9 C 0.1709(4) 0.0032(3) 0.4001(3) 0.081(3) Uani 1 1 d . . .
C13A_9 C 0.2112(9) 0.0219(9) 0.4282(7) 0.191(12) Uiso 0.60 1 d P B 1
H13Y_9 H 0.2302 0.0540 0.4317 0.286 Uiso 0.60 1 calc PR B 1
H13Z_9 H 0.2295 0.0076 0.4223 0.286 Uiso 0.60 1 calc PR B 1
H14D_9 H 0.2000 0.0163 0.4488 0.286 Uiso 0.60 1 calc PR B 1
C14A_9 C 0.1746(8) -0.0044(7) 0.3637(5) 0.134(8) Uiso 0.60 1 d P B 1
H14E_9 H 0.1984 0.0231 0.3602 0.201 Uiso 0.60 1 calc PR B 1
H14F_9 H 0.1452 -0.0136 0.3502 0.201 Uiso 0.60 1 calc PR B 1
H15D_9 H 0.1827 -0.0278 0.3569 0.201 Uiso 0.60 1 calc PR B 1
C15A_9 C 0.1612(7) 0.0410(7) 0.4155(6) 0.143(8) Uiso 0.60 1 d P B 1
H16E_9 H 0.1900 0.0694 0.4218 0.214 Uiso 0.60 1 calc PR B 1
H16F_9 H 0.1476 0.0360 0.4353 0.214 Uiso 0.60 1 calc PR B 1
H16G_9 H 0.1400 0.0417 0.3990 0.214 Uiso 0.60 1 calc PR B 1
C14B_9 C 0.2116(9) 0.0032(9) 0.3928(8) 0.191(12) Uiso 0.60 1 d P B 2
H15E_9 H 0.2374 0.0337 0.4001 0.287 Uiso 0.60 1 calc PR B 2
H15F_9 H 0.2081 -0.0089 0.3686 0.287 Uiso 0.60 1 calc PR B 2
H16D_9 H 0.2174 -0.0151 0.4045 0.287 Uiso 0.60 1 calc PR B 2
C15B_9 C 0.1484(9) 0.0232(9) 0.3805(7) 0.193(11) Uiso 0.60 1 d P B 2
H16H_9 H 0.1685 0.0554 0.3860 0.289 Uiso 0.60 1 calc PR B 2
H16I_9 H 0.1187 0.0168 0.3869 0.289 Uiso 0.60 1 calc PR B 2
H16J_9 H 0.1439 0.0100 0.3564 0.289 Uiso 0.60 1 calc PR B 2
C16_9 C 0.0938(6) -0.1517(5) 0.3664(4) 0.125(6) Uani 1 1 d . . .
C17A_9 C 0.1125(7) -0.1526(6) 0.4027(5) 0.081(6) Uiso 0.50 1 d P B .
H17G_9 H 0.1129 -0.1804 0.4004 0.121 Uiso 0.50 1 calc PR . .
H17H_9 H 0.0922 -0.1506 0.4183 0.121 Uiso 0.50 1 calc PR . .
H17I_9 H 0.1435 -0.1274 0.4114 0.121 Uiso 0.50 1 calc PR . .
C17B_9 C 0.1397(7) -0.1298(7) 0.3920(5) 0.094(7) Uiso 0.50 1 d P B .
H17J_9 H 0.1454 -0.1531 0.3960 0.142 Uiso 0.50 1 calc PR . .
H17K_9 H 0.1374 -0.1128 0.4131 0.142 Uiso 0.50 1 calc PR . .
H17L_9 H 0.1651 -0.1099 0.3829 0.142 Uiso 0.50 1 calc PR . .
C18_9 C 0.1182(5) -0.1482(4) 0.3365(4) 0.154(6) Uani 1 1 d . B .
H18M_9 H 0.1268 -0.1713 0.3315 0.231 Uiso 1 1 calc R . .
H18N_9 H 0.1458 -0.1190 0.3418 0.231 Uiso 1 1 calc R . .
H18O_9 H 0.0978 -0.1521 0.3171 0.231 Uiso 1 1 calc R . .
C19_9 C 0.0520(5) -0.1965(5) 0.3579(4) 0.150(6) Uani 1 1 d . B .
H19P_9 H 0.0604 -0.2181 0.3616 0.225 Uiso 1 1 calc R . .
H19Q_9 H 0.0381 -0.2051 0.3344 0.225 Uiso 1 1 calc R . .
H19R_9 H 0.0300 -0.1955 0.3721 0.225 Uiso 1 1 calc R . .
C20_9 C 0.0612(5) -0.0808(4) 0.4591(3) 0.101(4) Uani 1 1 d . . .
C21A_9 C 0.0863(12) -0.0844(13) 0.4906(9) 0.218(16) Uiso 0.50 1 d P B 1
H24M_9 H 0.1148 -0.0835 0.4858 0.327 Uiso 0.50 1 calc PR B 1
H24N_9 H 0.0662 -0.1124 0.4954 0.327 Uiso 0.50 1 calc PR B 1
H24O_9 H 0.0932 -0.0595 0.5100 0.327 Uiso 0.50 1 calc PR B 1
C22A_9 C 0.0700(10) -0.0327(9) 0.4752(7) 0.149(11) Uiso 0.50 1 d P B 1
H24S_9 H 0.1017 -0.0136 0.4871 0.224 Uiso 0.50 1 calc PR B 1
H24T_9 H 0.0492 -0.0337 0.4910 0.224 Uiso 0.50 1 calc PR B 1
H24U_9 H 0.0645 -0.0207 0.4577 0.224 Uiso 0.50 1 calc PR B 1
C23A_9 C 0.0201(14) -0.1134(14) 0.4525(11) 0.24(2) Uiso 0.50 1 d P B 1
H24Y_9 H 0.0204 -0.1403 0.4539 0.357 Uiso 0.50 1 calc PR B 1
H24Z_9 H 0.0057 -0.1181 0.4299 0.357 Uiso 0.50 1 calc PR B 1
H26Z_9 H 0.0026 -0.1067 0.4687 0.357 Uiso 0.50 1 calc PR B 1
C21B_9 C 0.0127(5) -0.0802(6) 0.4500(4) 0.057(5) Uiso 0.50 1 d P B 2
H24P_9 H 0.0097 -0.0772 0.4274 0.085 Uiso 0.50 1 calc PR B 2
H24Q_9 H 0.0134 -0.0551 0.4661 0.085 Uiso 0.50 1 calc PR B 2
H24R_9 H -0.0134 -0.1079 0.4512 0.085 Uiso 0.50 1 calc PR B 2
C22B_9 C 0.0453(7) -0.1241(6) 0.4700(5) 0.068(5) Uiso 0.50 1 d P B 2
H24V_9 H 0.0718 -0.1272 0.4758 0.103 Uiso 0.50 1 calc PR B 2
H24W_9 H 0.0235 -0.1498 0.4516 0.103 Uiso 0.50 1 calc PR B 2
H24X_9 H 0.0305 -0.1223 0.4895 0.103 Uiso 0.50 1 calc PR B 2
C23B_9 C 0.1000(8) -0.0406(8) 0.4805(6) 0.111(8) Uiso 0.50 1 d P B 2
H27Y_9 H 0.1259 -0.0455 0.4838 0.167 Uiso 0.50 1 calc PR B 2
H27Z_9 H 0.0918 -0.0326 0.5022 0.167 Uiso 0.50 1 calc PR B 2
H28A_9 H 0.1084 -0.0165 0.4701 0.167 Uiso 0.50 1 calc PR B 2
C24_9 C 0.0261(4) 0.0557(3) 0.3371(3) 0.077(3) Uani 1 1 d . . .
C25_9 C 0.0712(4) 0.0845(5) 0.3281(3) 0.199(8) Uani 1 1 d . . .
H28B_9 H 0.0889 0.0690 0.3252 0.299 Uiso 1 1 calc R . .
H28C_9 H 0.0885 0.1124 0.3460 0.299 Uiso 1 1 calc R . .
H28D_9 H 0.0658 0.0909 0.3072 0.299 Uiso 1 1 calc R . .
C26_9 C -0.0018(4) 0.0823(3) 0.3416(3) 0.107(4) Uani 1 1 d . . .
H28E_9 H -0.0314 0.0641 0.3475 0.161 Uiso 1 1 calc R . .
H28F_9 H -0.0068 0.0887 0.3207 0.161 Uiso 1 1 calc R . .
H28G_9 H 0.0159 0.1101 0.3595 0.161 Uiso 1 1 calc R . .
C27_9 C -0.0060(4) 0.0126(4) 0.3116(3) 0.115(4) Uani 1 1 d . . .
H28H_9 H 0.0085 -0.0059 0.3073 0.172 Uiso 1 1 calc R . .
H28I_9 H -0.0132 0.0182 0.2909 0.172 Uiso 1 1 calc R . .
H28J_9 H -0.0342 -0.0029 0.3201 0.172 Uiso 1 1 calc R . .
C28_9 C 0.0592(4) 0.0761(3) 0.4519(2) 0.077(3) Uani 1 1 d . . .
C29_9 C 0.0732(4) 0.0694(3) 0.4852(2) 0.113(4) Uani 1 1 d . . .
H29Y_9 H 0.0948 0.0584 0.4822 0.169 Uiso 1 1 calc R . .
H29Z_9 H 0.0460 0.0479 0.4916 0.169 Uiso 1 1 calc R . .
H29A_9 H 0.0878 0.0979 0.5026 0.169 Uiso 1 1 calc R . .
C30_9 C 0.0249(3) 0.0936(3) 0.4560(2) 0.087(3) Uani 1 1 d . . .
H30Y_9 H 0.0164 0.0976 0.4348 0.131 Uiso 1 1 calc R . .
H30Z_9 H 0.0393 0.1221 0.4734 0.131 Uiso 1 1 calc R . .
H31Y_9 H -0.0025 0.0721 0.4624 0.131 Uiso 1 1 calc R . .
C31_9 C 0.1022(4) 0.1088(3) 0.4407(3) 0.120(4) Uani 1 1 d . . .
H31Z_9 H 0.1236 0.0974 0.4382 0.180 Uiso 1 1 calc R . .
H32A_9 H 0.1171 0.1378 0.4575 0.180 Uiso 1 1 calc R . .
H32B_9 H 0.0931 0.1119 0.4192 0.180 Uiso 1 1 calc R . .
C32_9 C -0.0869(3) -0.0252(3) 0.3954(2) 0.068(3) Uani 1 1 d . . .
C33_9 C -0.1111(3) -0.0627(3) 0.3623(3) 0.088(3) Uani 1 1 d . . .
H33Y_9 H -0.0927 -0.0769 0.3564 0.132 Uiso 1 1 calc R . .
H33Z_9 H -0.1149 -0.0502 0.3445 0.132 Uiso 1 1 calc R . .
H34Y_9 H -0.1413 -0.0848 0.3650 0.132 Uiso 1 1 calc R . .
C34_9 C -0.1163(3) -0.0025(3) 0.4049(3) 0.092(3) Uani 1 1 d . . .
H34Z_9 H -0.1008 0.0213 0.4259 0.138 Uiso 1 1 calc R . .
H35Y_9 H -0.1464 -0.0245 0.4076 0.138 Uiso 1 1 calc R . .
H35Z_9 H -0.1200 0.0100 0.3872 0.138 Uiso 1 1 calc R . .
C35_9 C -0.0784(4) -0.0436(3) 0.4235(3) 0.108(4) Uani 1 1 d . . .
H36A_9 H -0.0599 -0.0576 0.4170 0.163 Uiso 1 1 calc R . .
H36B_9 H -0.1078 -0.0656 0.4273 0.163 Uiso 1 1 calc R . .
H36C_9 H -0.0621 -0.0192 0.4441 0.163 Uiso 1 1 calc R . .
B1_9 B 0.0170(3) -0.0643(3) 0.3633(2) 0.039(2) Uiso 1 1 d . . .
Zr1_10 Zr -0.70115(3) 0.59264(2) -0.277675(18) 0.03943(18) Uani 1 1 d . . .
Si1_10 Si -0.53769(7) 0.67320(6) -0.24167(5) 0.0361(5) Uani 1 1 d . . .
Si2_10 Si -0.60584(7) 0.77660(6) -0.23290(5) 0.0364(5) Uani 1 1 d . . .
O1_10 O -0.64391(15) 0.65063(14) -0.27357(11) 0.0390(12) Uani 1 1 d . . .
O2_10 O -0.56757(15) 0.69929(13) -0.23946(11) 0.0343(11) Uani 1 1 d . . .
O3_10 O -0.61311(16) 0.72907(14) -0.25666(12) 0.0424(13) Uani 1 1 d . . .
O4_10 O -0.48391(15) 0.70955(15) -0.22507(12) 0.0415(12) Uani 1 1 d . . .
O5_10 O -0.56079(16) 0.63542(14) -0.22168(12) 0.0425(13) Uani 1 1 d . C .
O6_10 O -0.53923(15) 0.64715(14) -0.28029(11) 0.0359(12) Uani 1 1 d . . .
O7_10 O -0.61396(16) 0.76836(14) -0.19615(12) 0.0428(13) Uani 1 1 d . . .
O8_10 O -0.55434(16) 0.81899(15) -0.22877(12) 0.0449(13) Uani 1 1 d . . .
O9_10 O -0.64214(17) 0.78849(15) -0.24960(12) 0.0427(13) Uani 1 1 d . . .
C1_10 C -0.7213(7) 0.5599(4) -0.2285(3) 0.119(5) Uani 1 1 d . . .
H1_10 H -0.7222 0.5325 -0.2300 0.143 Uiso 1 1 calc R . .
C2_10 C -0.6823(4) 0.6050(5) -0.2155(2) 0.085(3) Uani 1 1 d . . .
H2_10 H -0.6518 0.6127 -0.2077 0.102 Uiso 1 1 calc R . .
C3_10 C -0.6976(4) 0.6342(4) -0.2168(2) 0.079(3) Uani 1 1 d . . .
H3_10 H -0.6793 0.6656 -0.2093 0.095 Uiso 1 1 calc R . .
C4_10 C -0.7417(4) 0.6119(4) -0.2301(3) 0.086(3) Uani 1 1 d . . .
H4_10 H -0.7593 0.6255 -0.2334 0.103 Uiso 1 1 calc R . .
C5_10 C -0.7586(4) 0.5676(4) -0.2384(3) 0.082(3) Uani 1 1 d . . .
H5_10 H -0.7891 0.5455 -0.2487 0.098 Uiso 1 1 calc R . .
C6_10 C -0.7328(4) 0.5103(3) -0.3098(3) 0.093(4) Uani 1 1 d . . .
H6_10 H -0.7596 0.4887 -0.3044 0.111 Uiso 1 1 calc R . .
C7_10 C -0.6869(4) 0.5269(3) -0.2944(3) 0.080(3) Uani 1 1 d . . .
H7_10 H -0.6780 0.5176 -0.2771 0.096 Uiso 1 1 calc R . .
C8_10 C -0.6562(4) 0.5597(3) -0.3089(3) 0.071(3) Uani 1 1 d . . .
H8_10 H -0.6238 0.5761 -0.3030 0.086 Uiso 1 1 calc R . .
C9_10 C -0.6838(5) 0.5628(3) -0.3338(2) 0.079(3) Uani 1 1 d . . .
H9_10 H -0.6727 0.5820 -0.3477 0.095 Uiso 1 1 calc R . .
C10_10 C -0.7312(4) 0.5321(4) -0.3348(3) 0.092(4) Uani 1 1 d . . .
H10_10 H -0.7567 0.5272 -0.3494 0.110 Uiso 1 1 calc R . .
C11_10 C -0.7537(3) 0.6048(3) -0.3060(2) 0.065(2) Uani 1 1 d . . .
H11A_10 H -0.7535 0.5970 -0.3300 0.098 Uiso 1 1 calc R . .
H11B_10 H -0.7451 0.6361 -0.2980 0.098 Uiso 1 1 calc R . .
H11C_10 H -0.7844 0.5863 -0.3019 0.098 Uiso 1 1 calc R . .
C12_10 C -0.4609(3) 0.7507(2) -0.19661(19) 0.047(2) Uani 1 1 d . . .
C13_10 C -0.4118(3) 0.7586(3) -0.1868(2) 0.065(3) Uani 1 1 d . . .
H13A_10 H -0.3959 0.7628 -0.2058 0.098 Uiso 1 1 calc R . .
H13B_10 H -0.4138 0.7329 -0.1807 0.098 Uiso 1 1 calc R . .
H13C_10 H -0.3949 0.7852 -0.1678 0.098 Uiso 1 1 calc R . .
C14_10 C -0.4874(3) 0.7440(3) -0.1678(2) 0.073(3) Uani 1 1 d . . .
H14A_10 H -0.5180 0.7390 -0.1748 0.110 Uiso 1 1 calc R . .
H14B_10 H -0.4711 0.7704 -0.1486 0.110 Uiso 1 1 calc R . .
H14C_10 H -0.4900 0.7181 -0.1615 0.110 Uiso 1 1 calc R . .
C15_10 C -0.4590(3) 0.7886(2) -0.2102(2) 0.066(3) Uani 1 1 d . . .
H15A_10 H -0.4417 0.7917 -0.2285 0.100 Uiso 1 1 calc R . .
H15B_10 H -0.4440 0.8166 -0.1922 0.100 Uiso 1 1 calc R . .
H15C_10 H -0.4902 0.7815 -0.2184 0.100 Uiso 1 1 calc R . .
C16_10 C -0.5465(4) 0.6038(3) -0.2146(2) 0.069(3) Uani 1 1 d . . .
C17A_10 C -0.5897(6) 0.5718(6) -0.1983(5) 0.065(5) Uiso 0.50 1 d P C 1
H17A_10 H -0.5940 0.5904 -0.1792 0.097 Uiso 0.50 1 calc PR C 1
H17B_10 H -0.5828 0.5510 -0.1909 0.097 Uiso 0.50 1 calc PR C 1
H17C_10 H -0.6177 0.5552 -0.2152 0.097 Uiso 0.50 1 calc PR C 1
C18A_10 C -0.5343(8) 0.5839(7) -0.2399(5) 0.097(7) Uiso 0.50 1 d P C 1
H18A_10 H -0.5586 0.5698 -0.2596 0.146 Uiso 0.50 1 calc PR C 1
H18B_10 H -0.5293 0.5613 -0.2337 0.146 Uiso 0.50 1 calc PR C 1
H18C_10 H -0.5059 0.6059 -0.2449 0.146 Uiso 0.50 1 calc PR C 1
C19A_10 C -0.5115(8) 0.6301(8) -0.1792(6) 0.119(8) Uiso 0.50 1 d P C 1
H19A_10 H -0.5249 0.6432 -0.1632 0.179 Uiso 0.50 1 calc PR C 1
H19B_10 H -0.4826 0.6537 -0.1823 0.179 Uiso 0.50 1 calc PR C 1
H19C_10 H -0.5057 0.6094 -0.1707 0.179 Uiso 0.50 1 calc PR C 1
C17B_10 C -0.4939(6) 0.6206(5) -0.2155(4) 0.061(5) Uiso 0.50 1 d P C 2
H17D_10 H -0.4871 0.6274 -0.2367 0.092 Uiso 0.50 1 calc PR C 2
H17E_10 H -0.4870 0.5973 -0.2135 0.092 Uiso 0.50 1 calc PR C 2
H17F_10 H -0.4752 0.6473 -0.1969 0.092 Uiso 0.50 1 calc PR C 2
C18B_10 C -0.5584(8) 0.5936(7) -0.1852(5) 0.084(6) Uiso 0.50 1 d P C 2
H18D_10 H -0.5910 0.5836 -0.1858 0.126 Uiso 0.50 1 calc PR C 2
H18E_10 H -0.5403 0.6201 -0.1663 0.126 Uiso 0.50 1 calc PR C 2
H18F_10 H -0.5523 0.5700 -0.1829 0.126 Uiso 0.50 1 calc PR C 2
C19B_10 C -0.5725(6) 0.5601(5) -0.2491(4) 0.054(4) Uiso 0.50 1 d P C 2
H19D_10 H -0.5619 0.5698 -0.2687 0.081 Uiso 0.50 1 calc PR C 2
H19E_10 H -0.6057 0.5478 -0.2518 0.081 Uiso 0.50 1 calc PR C 2
H19F_10 H -0.5650 0.5373 -0.2469 0.081 Uiso 0.50 1 calc PR C 2
C20_10 C -0.5201(3) 0.6633(3) -0.30839(19) 0.048(2) Uani 1 1 d . . .
C21_10 C -0.4674(3) 0.6885(2) -0.3008(2) 0.059(2) Uani 1 1 d . . .
H21A_10 H -0.4563 0.7150 -0.2819 0.088 Uiso 1 1 calc R . .
H21B_10 H -0.4557 0.6972 -0.3205 0.088 Uiso 1 1 calc R . .
H21C_10 H -0.4566 0.6692 -0.2953 0.088 Uiso 1 1 calc R . .
C22_10 C -0.5375(3) 0.6946(3) -0.3156(2) 0.084(3) Uani 1 1 d . . .
H22A_10 H -0.5710 0.6785 -0.3204 0.126 Uiso 1 1 calc R . .
H22B_10 H -0.5258 0.7045 -0.3349 0.126 Uiso 1 1 calc R . .
H22C_10 H -0.5266 0.7204 -0.2960 0.126 Uiso 1 1 calc R . .
C23_10 C -0.5379(3) 0.6212(3) -0.3382(2) 0.083(3) Uani 1 1 d . . .
H23A_10 H -0.5714 0.6053 -0.3429 0.125 Uiso 1 1 calc R . .
H23B_10 H -0.5272 0.6018 -0.3326 0.125 Uiso 1 1 calc R . .
H23C_10 H -0.5262 0.6297 -0.3579 0.125 Uiso 1 1 calc R . .
C24_10 C -0.6087(3) 0.7993(3) -0.1630(2) 0.053(2) Uani 1 1 d . . .
C25_10 C -0.5593(3) 0.8188(3) -0.1444(2) 0.068(3) Uani 1 1 d . . .
H25A_10 H -0.5375 0.8371 -0.1567 0.103 Uiso 1 1 calc R . .
H25B_10 H -0.5537 0.7945 -0.1431 0.103 Uiso 1 1 calc R . .
H25C_10 H -0.5553 0.8371 -0.1219 0.103 Uiso 1 1 calc R . .
C26_10 C -0.6179(3) 0.8369(2) -0.1684(2) 0.063(2) Uani 1 1 d . . .
H26A_10 H -0.6494 0.8236 -0.1802 0.094 Uiso 1 1 calc R . .
H26B_10 H -0.5965 0.8533 -0.1817 0.094 Uiso 1 1 calc R . .
H26C_10 H -0.6136 0.8572 -0.1467 0.094 Uiso 1 1 calc R . .
C27_10 C -0.6452(3) 0.7698(2) -0.14480(19) 0.058(2) Uani 1 1 d . . .
H27A_10 H -0.6759 0.7582 -0.1573 0.087 Uiso 1 1 calc R . .
H27B_10 H -0.6420 0.7876 -0.1222 0.087 Uiso 1 1 calc R . .
H27C_10 H -0.6405 0.7450 -0.1434 0.087 Uiso 1 1 calc R . .
C28_10 C -0.5327(3) 0.8474(2) -0.2507(2) 0.054(2) Uani 1 1 d . . .
C29_10 C -0.4806(3) 0.8721(3) -0.2377(3) 0.084(3) Uani 1 1 d . . .
H29A_10 H -0.4701 0.8505 -0.2392 0.127 Uiso 1 1 calc R . .
H29B_10 H -0.4738 0.8897 -0.2144 0.127 Uiso 1 1 calc R . .
H29C_10 H -0.4647 0.8918 -0.2513 0.127 Uiso 1 1 calc R . .
C30_10 C -0.5500(3) 0.8813(3) -0.2486(2) 0.073(3) Uani 1 1 d . . .
H30A_10 H -0.5831 0.8653 -0.2568 0.109 Uiso 1 1 calc R . .
H30B_10 H -0.5345 0.9010 -0.2623 0.109 Uiso 1 1 calc R . .
H30C_10 H -0.5433 0.8990 -0.2253 0.109 Uiso 1 1 calc R . .
C31_10 C -0.5448(3) 0.8181(3) -0.2879(2) 0.081(3) Uani 1 1 d . . .
H31A_10 H -0.5779 0.8028 -0.2957 0.122 Uiso 1 1 calc R . .
H31B_10 H -0.5347 0.7962 -0.2892 0.122 Uiso 1 1 calc R . .
H31C_10 H -0.5292 0.8372 -0.3020 0.122 Uiso 1 1 calc R . .
C32_10 C -0.6911(3) 0.7613(2) -0.26484(19) 0.046(2) Uani 1 1 d . . .
C33_10 C -0.7178(3) 0.7302(3) -0.2443(2) 0.062(2) Uani 1 1 d . . .
H33A_10 H -0.7066 0.7094 -0.2442 0.093 Uiso 1 1 calc R . .
H33B_10 H -0.7504 0.7137 -0.2542 0.093 Uiso 1 1 calc R . .
H33C_10 H -0.7134 0.7477 -0.2213 0.093 Uiso 1 1 calc R . .
C34_10 C -0.7075(3) 0.7949(3) -0.2658(2) 0.076(3) Uani 1 1 d . . .
H34A_10 H -0.6898 0.8143 -0.2790 0.114 Uiso 1 1 calc R . .
H34B_10 H -0.7031 0.8128 -0.2430 0.114 Uiso 1 1 calc R . .
H34C_10 H -0.7400 0.7788 -0.2759 0.114 Uiso 1 1 calc R . .
C35_10 C -0.6957(3) 0.7339(3) -0.3015(2) 0.069(3) Uani 1 1 d . . .
H35A_10 H -0.6784 0.7543 -0.3143 0.104 Uiso 1 1 calc R . .
H35B_10 H -0.7281 0.7165 -0.3122 0.104 Uiso 1 1 calc R . .
H35C_10 H -0.6836 0.7139 -0.3008 0.104 Uiso 1 1 calc R . .
B1_10 B -0.6089(3) 0.6916(3) -0.2569(2) 0.0302(19) Uiso 1 1 d . . .
Zr1_11 Zr -0.58968(2) 0.38302(2) -0.062260(17) 0.03303(17) Uani 1 1 d . . .
Si1_11 Si -0.74874(7) 0.32091(6) -0.10933(5) 0.0339(5) Uani 1 1 d . . .
Si2_11 Si -0.65337(7) 0.38960(6) -0.18856(5) 0.0317(5) Uani 1 1 d . . .
O1_11 O -0.63552(15) 0.38294(15) -0.09486(11) 0.0399(12) Uani 1 1 d . D .
O2_11 O -0.70898(15) 0.33987(14) -0.13280(11) 0.0377(12) Uani 1 1 d . D .
O3_11 O -0.64132(16) 0.38871(18) -0.15035(13) 0.0639(16) Uani 1 1 d . D .
O4_11 O -0.79889(15) 0.29134(14) -0.13404(12) 0.0413(12) Uani 1 1 d . . .
O5_11 O -0.73709(16) 0.29092(14) -0.08962(12) 0.0423(13) Uani 1 1 d . . .
O6_11 O -0.74922(16) 0.36133(14) -0.08146(12) 0.0425(13) Uani 1 1 d . . .
O7A_11 O -0.6875(3) 0.3416(2) -0.2190(2) 0.0191(19) Uiso 0.50 1 d P D 1
O8A_11 O -0.6794(3) 0.4180(3) -0.1819(2) 0.0186(19) Uiso 0.50 1 d P D 1
O7B_11 O -0.6641(4) 0.3405(3) -0.2057(3) 0.057(3) Uiso 0.50 1 d P D 2
O8B_11 O -0.6983(4) 0.3948(4) -0.1981(3) 0.052(3) Uiso 0.50 1 d P D 2
O9_11 O -0.60674(19) 0.4202(2) -0.20083(14) 0.079(2) Uani 1 1 d . D .
C1_11 C -0.6029(4) 0.3055(3) -0.0626(2) 0.065(3) Uani 1 1 d . . .
H1_11 H -0.6178 0.2932 -0.0458 0.079 Uiso 1 1 calc R . .
C2_11 C -0.6246(3) 0.3003(2) -0.0947(2) 0.048(2) Uani 1 1 d . . .
H2_11 H -0.6566 0.2838 -0.1031 0.057 Uiso 1 1 calc R . .
C3_11 C -0.5899(3) 0.3240(3) -0.11227(19) 0.050(2) Uani 1 1 d . . .
H3_11 H -0.5945 0.3265 -0.1341 0.060 Uiso 1 1 calc R . .
C4_11 C -0.5470(3) 0.3433(3) -0.0904(3) 0.066(3) Uani 1 1 d . . .
H4_11 H -0.5179 0.3605 -0.0956 0.079 Uiso 1 1 calc R . .
C5_11 C -0.5548(4) 0.3329(3) -0.0602(3) 0.079(3) Uani 1 1 d . . .
H5_11 H -0.5319 0.3424 -0.0414 0.094 Uiso 1 1 calc R . .
C6_11 C -0.5739(3) 0.3979(3) 0.00182(18) 0.052(2) Uani 1 1 d . . .
H6_11 H -0.5575 0.3860 0.0108 0.062 Uiso 1 1 calc R . .
C7_11 C -0.6215(3) 0.3763(3) -0.00841(18) 0.050(2) Uani 1 1 d . . .
H7_11 H -0.6425 0.3470 -0.0082 0.060 Uiso 1 1 calc R . .
C8_11 C -0.6331(3) 0.4053(3) -0.01909(19) 0.056(2) Uani 1 1 d . . .
H8_11 H -0.6631 0.3995 -0.0262 0.067 Uiso 1 1 calc R . .
C9_11 C -0.5908(3) 0.4454(3) -0.01719(19) 0.056(2) Uani 1 1 d . . .
H9_11 H -0.5876 0.4704 -0.0237 0.068 Uiso 1 1 calc R . .
C10_11 C -0.5546(3) 0.4399(3) -0.0034(2) 0.058(2) Uani 1 1 d . . .
H10_11 H -0.5229 0.4612 0.0014 0.070 Uiso 1 1 calc R . .
C11_11 C -0.5243(2) 0.4404(2) -0.07180(19) 0.055(2) Uani 1 1 d . . .
H11A_11 H -0.5218 0.4327 -0.0953 0.082 Uiso 1 1 calc R . .
H11B_11 H -0.4973 0.4452 -0.0577 0.082 Uiso 1 1 calc R . .
H11C_11 H -0.5263 0.4676 -0.0663 0.082 Uiso 1 1 calc R . .
C12_11 C -0.8149(3) 0.2610(3) -0.1687(2) 0.057(2) Uani 1 1 d . . .
C13_11 C -0.8652(3) 0.2281(3) -0.1710(3) 0.121(5) Uani 1 1 d . . .
H13A_11 H -0.8682 0.2108 -0.1552 0.181 Uiso 1 1 calc R . .
H13B_11 H -0.8779 0.2080 -0.1938 0.181 Uiso 1 1 calc R . .
H13C_11 H -0.8820 0.2442 -0.1657 0.181 Uiso 1 1 calc R . .
C14_11 C -0.7864(3) 0.2362(3) -0.1749(2) 0.088(3) Uani 1 1 d . . .
H14A_11 H -0.7542 0.2579 -0.1734 0.132 Uiso 1 1 calc R . .
H14B_11 H -0.7983 0.2149 -0.1972 0.132 Uiso 1 1 calc R . .
H14C_11 H -0.7891 0.2204 -0.1580 0.132 Uiso 1 1 calc R . .
C15_11 C -0.8078(3) 0.2889(3) -0.1928(2) 0.082(3) Uani 1 1 d . . .
H15A_11 H -0.7750 0.3096 -0.1905 0.124 Uiso 1 1 calc R . .
H15B_11 H -0.8240 0.3056 -0.1878 0.124 Uiso 1 1 calc R . .
H15C_11 H -0.8198 0.2694 -0.2158 0.124 Uiso 1 1 calc R . .
C16_11 C -0.7601(3) 0.2648(3) -0.0670(2) 0.062(3) Uani 1 1 d . . .
C17_11 C -0.8104(3) 0.2371(4) -0.0784(3) 0.141(6) Uani 1 1 d . . .
H17A_11 H -0.8242 0.2561 -0.0754 0.212 Uiso 1 1 calc R . .
H17B_11 H -0.8232 0.2159 -0.0653 0.212 Uiso 1 1 calc R . .
H17C_11 H -0.8171 0.2209 -0.1021 0.212 Uiso 1 1 calc R . .
C18A_11 C -0.7288(4) 0.2516(4) -0.0521(3) 0.030(3) Uiso 0.50 1 d P . .
H18A_11 H -0.6972 0.2764 -0.0469 0.045 Uiso 0.50 1 calc PR . .
H18B_11 H -0.7306 0.2258 -0.0680 0.045 Uiso 0.50 1 calc PR . .
H18C_11 H -0.7381 0.2440 -0.0315 0.045 Uiso 0.50 1 calc PR . .
C18B_11 C -0.7655(9) 0.2149(8) -0.0878(6) 0.137(10) Uiso 0.50 1 d P . .
H18D_11 H -0.7355 0.2168 -0.0852 0.206 Uiso 0.50 1 calc PR . .
H18E_11 H -0.7774 0.2077 -0.1115 0.206 Uiso 0.50 1 calc PR . .
H18F_11 H -0.7867 0.1917 -0.0785 0.206 Uiso 0.50 1 calc PR . .
C19_11 C -0.7544(6) 0.2973(6) -0.0339(3) 0.307(15) Uani 1 1 d . . .
H19A_11 H -0.7218 0.3174 -0.0248 0.461 Uiso 1 1 calc R . .
H19B_11 H -0.7690 0.2808 -0.0181 0.461 Uiso 1 1 calc R . .
H19C_11 H -0.7689 0.3145 -0.0376 0.461 Uiso 1 1 calc R . .
C20_11 C -0.7497(3) 0.4022(2) -0.0840(2) 0.048(2) Uani 1 1 d . . .
C21_11 C -0.7814(3) 0.3910(3) -0.1172(2) 0.073(3) Uani 1 1 d . . .
H21A_11 H -0.7683 0.3828 -0.1362 0.109 Uiso 1 1 calc R . .
H21B_11 H -0.7839 0.4170 -0.1182 0.109 Uiso 1 1 calc R . .
H21C_11 H -0.8118 0.3661 -0.1182 0.109 Uiso 1 1 calc R . .
C22_11 C -0.7006(3) 0.4383(2) -0.0825(2) 0.070(3) Uani 1 1 d . . .
H22A_11 H -0.6890 0.4290 -0.1021 0.105 Uiso 1 1 calc R . .
H22B_11 H -0.6812 0.4431 -0.0621 0.105 Uiso 1 1 calc R . .
H22C_11 H -0.7002 0.4660 -0.0825 0.105 Uiso 1 1 calc R . .
C23_11 C -0.7695(3) 0.4149(3) -0.0538(2) 0.078(3) Uani 1 1 d . . .
H23A_11 H -0.8009 0.3911 -0.0555 0.117 Uiso 1 1 calc R . .
H23B_11 H -0.7697 0.4424 -0.0534 0.117 Uiso 1 1 calc R . .
H23C_11 H -0.7506 0.4195 -0.0332 0.117 Uiso 1 1 calc R . .
C24_11 C -0.6755(3) 0.3108(2) -0.23968(18) 0.046(2) Uani 1 1 d . . .
C25_11 C -0.7243(3) 0.2744(4) -0.2538(2) 0.118(4) Uani 1 1 d . D .
H25A_11 H -0.7384 0.2617 -0.2362 0.177 Uiso 1 1 calc R . .
H25B_11 H -0.7246 0.2511 -0.2718 0.177 Uiso 1 1 calc R . .
H25C_11 H -0.7415 0.2866 -0.2627 0.177 Uiso 1 1 calc R . .
C26_11 C -0.6494(3) 0.3333(3) -0.2643(2) 0.098(4) Uani 1 1 d . D .
H26A_11 H -0.6183 0.3563 -0.2530 0.148 Uiso 1 1 calc R . .
H26B_11 H -0.6650 0.3469 -0.2735 0.148 Uiso 1 1 calc R . .
H26C_11 H -0.6480 0.3113 -0.2825 0.148 Uiso 1 1 calc R . .
C27_11 C -0.6514(4) 0.2905(4) -0.2249(4) 0.194(9) Uani 1 1 d . D .
H27A_11 H -0.6195 0.3133 -0.2153 0.291 Uiso 1 1 calc R . .
H27B_11 H -0.6523 0.2665 -0.2424 0.291 Uiso 1 1 calc R . .
H27C_11 H -0.6668 0.2787 -0.2073 0.291 Uiso 1 1 calc R . .
C28_11 C -0.7034(3) 0.4309(3) -0.2036(2) 0.050(2) Uani 1 1 d . . .
C29_11 C -0.7552(3) 0.4010(4) -0.2136(3) 0.136(5) Uani 1 1 d . D .
H29A_11 H -0.7623 0.3734 -0.2303 0.205 Uiso 1 1 calc R . .
H29B_11 H -0.7684 0.4163 -0.2231 0.205 Uiso 1 1 calc R . .
H29C_11 H -0.7683 0.3940 -0.1939 0.205 Uiso 1 1 calc R . .
C30_11 C -0.6816(3) 0.4405(3) -0.2352(2) 0.083(3) Uani 1 1 d . D .
H30A_11 H -0.6898 0.4124 -0.2516 0.124 Uiso 1 1 calc R . .
H30B_11 H -0.6482 0.4584 -0.2287 0.124 Uiso 1 1 calc R . .
H30C_11 H -0.6932 0.4567 -0.2451 0.124 Uiso 1 1 calc R . .
C31_11 C -0.6911(4) 0.4734(3) -0.1783(3) 0.151(6) Uani 1 1 d . D .
H31A_11 H -0.6577 0.4919 -0.1724 0.227 Uiso 1 1 calc R . .
H31B_11 H -0.7036 0.4671 -0.1583 0.227 Uiso 1 1 calc R . .
H31C_11 H -0.7039 0.4891 -0.1876 0.227 Uiso 1 1 calc R . .
C32_11 C -0.5594(2) 0.4511(2) -0.18823(18) 0.0370(18) Uani 1 1 d . . .
C33_11 C -0.5362(3) 0.4256(3) -0.1789(2) 0.085(3) Uani 1 1 d . D .
H33A_11 H -0.5496 0.4126 -0.1612 0.127 Uiso 1 1 calc R . .
H33B_11 H -0.5033 0.4462 -0.1710 0.127 Uiso 1 1 calc R . .
H33C_11 H -0.5408 0.4020 -0.1986 0.127 Uiso 1 1 calc R . .
C34_11 C -0.5391(3) 0.4717(2) -0.21592(19) 0.054(2) Uani 1 1 d . D .
H34A_11 H -0.5542 0.4877 -0.2215 0.081 Uiso 1 1 calc R . .
H34B_11 H -0.5438 0.4483 -0.2358 0.081 Uiso 1 1 calc R . .
H34C_11 H -0.5063 0.4925 -0.2082 0.081 Uiso 1 1 calc R . .
C35_11 C -0.5539(3) 0.4869(3) -0.1564(2) 0.085(3) Uani 1 1 d . D .
H35A_11 H -0.5673 0.4726 -0.1393 0.128 Uiso 1 1 calc R . .
H35B_11 H -0.5696 0.5024 -0.1620 0.128 Uiso 1 1 calc R . .
H35C_11 H -0.5213 0.5082 -0.1480 0.128 Uiso 1 1 calc R . .
B1_11 B -0.6618(3) 0.3704(3) -0.1252(2) 0.035(2) Uiso 1 1 d . . .
Zr1_12 Zr 0.40310(2) 0.39489(2) 0.437026(17) 0.03903(18) Uani 1 1 d . . .
Si1_12 Si 0.24220(7) 0.32142(6) 0.39067(5) 0.0392(5) Uani 1 1 d . . .
Si2_12 Si 0.33211(7) 0.38396(6) 0.30720(5) 0.0342(5) Uani 1 1 d . . .
O1_12 O 0.35372(15) 0.38763(14) 0.40284(11) 0.0369(12) Uani 1 1 d . . .
O2_12 O 0.28003(15) 0.33881(14) 0.36592(11) 0.0374(12) Uani 1 1 d . . .
O3_12 O 0.34723(15) 0.38200(14) 0.34476(11) 0.0357(11) Uani 1 1 d . . .
O4_12 O 0.19050(16) 0.29318(16) 0.36831(13) 0.0528(14) Uani 1 1 d . . .
O5_12 O 0.25525(17) 0.29149(16) 0.40937(13) 0.0520(14) Uani 1 1 d . . .
O6_12 O 0.24463(17) 0.36274(15) 0.41992(12) 0.0480(13) Uani 1 1 d . E .
O7_12 O 0.29772(16) 0.33505(15) 0.28016(11) 0.0450(13) Uani 1 1 d . . .
O8_12 O 0.30445(17) 0.41214(16) 0.31376(12) 0.0480(13) Uani 1 1 d . . .
O9_12 O 0.37844(17) 0.40817(15) 0.29134(11) 0.0430(13) Uani 1 1 d . . .
C1_12 C 0.3942(5) 0.3206(4) 0.4408(3) 0.087(3) Uani 1 1 d . . .
H1_12 H 0.3787 0.3086 0.4574 0.105 Uiso 1 1 calc R . .
C2_12 C 0.3740(3) 0.3128(3) 0.4076(3) 0.067(3) Uani 1 1 d . . .
H2_12 H 0.3425 0.2944 0.3979 0.080 Uiso 1 1 calc R . .
C3_12 C 0.4097(4) 0.3374(3) 0.3913(2) 0.066(3) Uani 1 1 d . . .
H3_12 H 0.4061 0.3385 0.3689 0.079 Uiso 1 1 calc R . .
C4_12 C 0.4511(4) 0.3598(4) 0.4141(3) 0.086(4) Uani 1 1 d . . .
H4_12 H 0.4803 0.3786 0.4098 0.104 Uiso 1 1 calc R . .
C5_12 C 0.4423(5) 0.3498(4) 0.4443(3) 0.092(4) Uani 1 1 d . . .
H5_12 H 0.4645 0.3605 0.4639 0.110 Uiso 1 1 calc R . .
C6_12 C 0.4298(3) 0.4271(3) 0.50110(19) 0.061(2) Uani 1 1 d . . .
H6_12 H 0.4547 0.4253 0.5106 0.074 Uiso 1 1 calc R . .
C7_12 C 0.3824(3) 0.3939(3) 0.49559(19) 0.054(2) Uani 1 1 d . . .
H7_12 H 0.3705 0.3667 0.5011 0.065 Uiso 1 1 calc R . .
C8_12 C 0.3564(3) 0.4094(3) 0.48026(18) 0.050(2) Uani 1 1 d . . .
H8_12 H 0.3241 0.3941 0.4736 0.060 Uiso 1 1 calc R . .
C9_12 C 0.3878(3) 0.4521(3) 0.47665(19) 0.052(2) Uani 1 1 d . . .
H9_12 H 0.3799 0.4700 0.4671 0.063 Uiso 1 1 calc R . .
C10_12 C 0.4331(3) 0.4632(3) 0.48999(19) 0.058(2) Uani 1 1 d . . .
H10_12 H 0.4605 0.4898 0.4912 0.069 Uiso 1 1 calc R . .
C11_12 C 0.4646(3) 0.4522(3) 0.4236(2) 0.069(3) Uani 1 1 d . . .
H11A_12 H 0.4702 0.4808 0.4378 0.104 Uiso 1 1 calc R . .
H11B_12 H 0.4576 0.4503 0.4001 0.104 Uiso 1 1 calc R . .
H11C_12 H 0.4920 0.4495 0.4274 0.104 Uiso 1 1 calc R . .
C12_12 C 0.1691(3) 0.2605(3) 0.3350(2) 0.058(2) Uani 1 1 d . . .
C13_12 C 0.1174(3) 0.2322(4) 0.3370(3) 0.128(5) Uani 1 1 d . . .
H13A_12 H 0.1148 0.2171 0.3543 0.192 Uiso 1 1 calc R . .
H13B_12 H 0.1008 0.2100 0.3154 0.192 Uiso 1 1 calc R . .
H13C_12 H 0.1042 0.2516 0.3426 0.192 Uiso 1 1 calc R . .
C14_12 C 0.1924(3) 0.2308(3) 0.3283(2) 0.084(3) Uani 1 1 d . . .
H14A_12 H 0.1877 0.2149 0.3453 0.126 Uiso 1 1 calc R . .
H14B_12 H 0.2252 0.2497 0.3293 0.126 Uiso 1 1 calc R . .
H14C_12 H 0.1786 0.2093 0.3061 0.126 Uiso 1 1 calc R . .
C15_12 C 0.1764(3) 0.2852(3) 0.3085(2) 0.074(3) Uani 1 1 d . . .
H15A_12 H 0.1619 0.3036 0.3127 0.112 Uiso 1 1 calc R . .
H15B_12 H 0.1627 0.2638 0.2864 0.112 Uiso 1 1 calc R . .
H15C_12 H 0.2093 0.3042 0.3096 0.112 Uiso 1 1 calc R . .
C16_12 C 0.2339(3) 0.2660(3) 0.4330(2) 0.057(2) Uani 1 1 d . . .
C17_12 C 0.1847(5) 0.2571(5) 0.4330(4) 0.190(8) Uani 1 1 d . . .
H17A_12 H 0.1670 0.2418 0.4102 0.285 Uiso 1 1 calc R . .
H17B_12 H 0.1851 0.2853 0.4410 0.285 Uiso 1 1 calc R . .
H17C_12 H 0.1706 0.2385 0.4477 0.285 Uiso 1 1 calc R . .
C18_12 C 0.2275(5) 0.2202(3) 0.4181(3) 0.156(6) Uani 1 1 d . . .
H18A_12 H 0.2076 0.2067 0.3961 0.234 Uiso 1 1 calc R . .
H18B_12 H 0.2135 0.2017 0.4329 0.234 Uiso 1 1 calc R . .
H18C_12 H 0.2573 0.2226 0.4157 0.234 Uiso 1 1 calc R . .
C19_12 C 0.2629(5) 0.2886(5) 0.4653(3) 0.218(10) Uani 1 1 d . . .
H19A_12 H 0.2658 0.3179 0.4735 0.327 Uiso 1 1 calc R . .
H19B_12 H 0.2933 0.2920 0.4637 0.327 Uiso 1 1 calc R . .
H19C_12 H 0.2495 0.2712 0.4809 0.327 Uiso 1 1 calc R . .
C20_12 C 0.2358(3) 0.3991(2) 0.4181(2) 0.049(2) Uani 1 1 d . . .
C21A_12 C 0.1836(6) 0.3785(6) 0.4191(5) 0.082(6) Uiso 0.50 1 d P E 1
H21A_12 H 0.1776 0.3691 0.4394 0.123 Uiso 0.50 1 calc PR E 1
H21B_12 H 0.1662 0.3527 0.3995 0.123 Uiso 0.50 1 calc PR E 1
H21C_12 H 0.1743 0.4007 0.4189 0.123 Uiso 0.50 1 calc PR E 1
C22A_12 C 0.2489(7) 0.4143(6) 0.3896(5) 0.074(5) Uiso 0.50 1 d P E 1
H22A_12 H 0.2820 0.4269 0.3910 0.111 Uiso 0.50 1 calc PR E 1
H22B_12 H 0.2407 0.4371 0.3889 0.111 Uiso 0.50 1 calc PR E 1
H22C_12 H 0.2329 0.3893 0.3693 0.111 Uiso 0.50 1 calc PR E 1
C23A_12 C 0.2616(6) 0.4354(5) 0.4534(4) 0.061(5) Uiso 0.50 1 d P E 1
H23A_12 H 0.2498 0.4221 0.4714 0.092 Uiso 0.50 1 calc PR E 1
H23B_12 H 0.2562 0.4604 0.4548 0.092 Uiso 0.50 1 calc PR E 1
H23C_12 H 0.2945 0.4460 0.4557 0.092 Uiso 0.50 1 calc PR E 1
C21B_12 C 0.2789(6) 0.4351(6) 0.4113(5) 0.077(6) Uiso 0.50 1 d P E 2
H21D_12 H 0.2861 0.4230 0.3904 0.115 Uiso 0.50 1 calc PR E 2
H21E_12 H 0.3042 0.4458 0.4297 0.115 Uiso 0.50 1 calc PR E 2
H21F_12 H 0.2742 0.4596 0.4094 0.115 Uiso 0.50 1 calc PR E 2
C22B_12 C 0.2197(8) 0.4131(7) 0.4489(5) 0.103(7) Uiso 0.50 1 d P E 2
H22D_12 H 0.1916 0.3878 0.4511 0.155 Uiso 0.50 1 calc PR E 2
H22E_12 H 0.2135 0.4369 0.4473 0.155 Uiso 0.50 1 calc PR E 2
H22F_12 H 0.2434 0.4238 0.4685 0.155 Uiso 0.50 1 calc PR E 2
C23B_12 C 0.1966(6) 0.3853(6) 0.3880(5) 0.077(6) Uiso 0.50 1 d P E 2
H23D_12 H 0.2051 0.3759 0.3669 0.115 Uiso 0.50 1 calc PR E 2
H23E_12 H 0.1925 0.4108 0.3881 0.115 Uiso 0.50 1 calc PR E 2
H23F_12 H 0.1679 0.3609 0.3904 0.115 Uiso 0.50 1 calc PR E 2
C24_12 C 0.3075(3) 0.2995(2) 0.2629(2) 0.051(2) Uani 1 1 d . . .
C25_12 C 0.2592(3) 0.2592(3) 0.2466(2) 0.075(3) Uani 1 1 d . . .
H25A_12 H 0.2416 0.2504 0.2642 0.113 Uiso 1 1 calc R . .
H25B_12 H 0.2623 0.2344 0.2337 0.113 Uiso 1 1 calc R . .
H25C_12 H 0.2434 0.2675 0.2318 0.113 Uiso 1 1 calc R . .
C26_12 C 0.3360(3) 0.3142(3) 0.2363(2) 0.083(3) Uani 1 1 d . . .
H26A_12 H 0.3662 0.3396 0.2470 0.125 Uiso 1 1 calc R . .
H26B_12 H 0.3205 0.3227 0.2213 0.125 Uiso 1 1 calc R . .
H26C_12 H 0.3395 0.2896 0.2234 0.125 Uiso 1 1 calc R . .
C27_12 C 0.3314(3) 0.2885(3) 0.2894(2) 0.072(3) Uani 1 1 d . . .
H27A_12 H 0.3117 0.2793 0.3059 0.108 Uiso 1 1 calc R . .
H27B_12 H 0.3607 0.3149 0.3008 0.108 Uiso 1 1 calc R . .
H27C_12 H 0.3367 0.2644 0.2783 0.108 Uiso 1 1 calc R . .
C28_12 C 0.2807(3) 0.4242(3) 0.2911(2) 0.049(2) Uani 1 1 d . . .
C29_12 C 0.2837(4) 0.4684(3) 0.3132(2) 0.100(4) Uani 1 1 d . . .
H29A_12 H 0.3158 0.4918 0.3202 0.149 Uiso 1 1 calc R . .
H29B_12 H 0.2700 0.4628 0.3330 0.149 Uiso 1 1 calc R . .
H29C_12 H 0.2671 0.4778 0.3001 0.149 Uiso 1 1 calc R . .
C30_12 C 0.3037(3) 0.4336(3) 0.2609(2) 0.088(3) Uani 1 1 d . . .
H30A_12 H 0.3357 0.4573 0.2686 0.132 Uiso 1 1 calc R . .
H30B_12 H 0.2876 0.4430 0.2472 0.132 Uiso 1 1 calc R . .
H30C_12 H 0.3027 0.4067 0.2475 0.132 Uiso 1 1 calc R . .
C31_12 C 0.2313(3) 0.3880(3) 0.2801(3) 0.090(3) Uani 1 1 d . . .
H31A_12 H 0.2173 0.3827 0.2998 0.135 Uiso 1 1 calc R . .
H31B_12 H 0.2297 0.3607 0.2669 0.135 Uiso 1 1 calc R . .
H31C_12 H 0.2148 0.3971 0.2666 0.135 Uiso 1 1 calc R . .
C32_12 C 0.4250(2) 0.4451(2) 0.30450(18) 0.0387(18) Uani 1 1 d . . .
C33_12 C 0.4542(3) 0.4277(3) 0.3177(2) 0.063(2) Uani 1 1 d . . .
H33A_12 H 0.4424 0.4163 0.3365 0.095 Uiso 1 1 calc R . .
H33B_12 H 0.4860 0.4518 0.3253 0.095 Uiso 1 1 calc R . .
H33C_12 H 0.4530 0.4037 0.2999 0.095 Uiso 1 1 calc R . .
C34_12 C 0.4427(3) 0.4635(3) 0.27474(19) 0.058(2) Uani 1 1 d . . .
H34A_12 H 0.4236 0.4745 0.2667 0.087 Uiso 1 1 calc R . .
H34B_12 H 0.4414 0.4398 0.2566 0.087 Uiso 1 1 calc R . .
H34C_12 H 0.4744 0.4878 0.2821 0.087 Uiso 1 1 calc R . .
C35_12 C 0.4246(3) 0.4819(2) 0.33328(19) 0.061(2) Uani 1 1 d . . .
H35A_12 H 0.4059 0.4929 0.3245 0.091 Uiso 1 1 calc R . .
H35B_12 H 0.4560 0.5065 0.3420 0.091 Uiso 1 1 calc R . .
H35C_12 H 0.4117 0.4693 0.3513 0.091 Uiso 1 1 calc R . .
B1_12 B 0.3263(3) 0.3697(3) 0.3719(2) 0.0312(19) Uiso 1 1 d . . .
Zr1_13 Zr 0.71191(3) 0.14357(3) 0.53718(2) 0.0523(2) Uani 1 1 d . . .
Si1_13 Si 0.58857(9) 0.06403(8) 0.42859(7) 0.0581(7) Uani 1 1 d . . .
Si2_13 Si 0.65673(9) -0.02296(7) 0.46970(6) 0.0528(6) Uani 1 1 d . . .
O1_13 O 0.6801(2) 0.08664(17) 0.50007(15) 0.082(2) Uani 1 1 d . F .
O2_13 O 0.6284(2) 0.0651(2) 0.45045(19) 0.113(3) Uani 1 1 d . F .
O3_13 O 0.6493(2) 0.01459(19) 0.45994(19) 0.106(3) Uani 1 1 d . F .
O4_13 O 0.5431(2) 0.0136(2) 0.41576(17) 0.095(2) Uani 1 1 d . . .
O5A_13 O 0.5865(5) 0.1058(5) 0.4579(4) 0.098(5) Uiso 0.50 1 d P . .
O5B_13 O 0.5618(6) 0.0900(6) 0.4408(5) 0.122(6) Uiso 0.50 1 d P . .
O6_13 O 0.6031(3) 0.0768(2) 0.39509(19) 0.117(3) Uani 1 1 d . . .
O7A_13 O 0.6101(4) -0.0721(4) 0.4514(3) 0.071(3) Uiso 0.50 1 d P F 1
O8A_13 O 0.7013(4) -0.0271(3) 0.4607(3) 0.048(3) Uiso 0.50 1 d P F 1
O9A_13 O 0.6513(4) -0.0143(3) 0.5102(3) 0.044(3) Uiso 0.50 1 d P F 1
O7B_13 O 0.6446(7) -0.0625(7) 0.4398(5) 0.146(6) Uiso 0.50 1 d P F 2
O8B_13 O 0.7138(7) -0.0015(7) 0.4814(5) 0.142(7) Uiso 0.50 1 d P F 2
O9B_13 O 0.6282(6) -0.0412(6) 0.4985(5) 0.120(6) Uiso 0.50 1 d P F 2
C1_13 C 0.6557(4) 0.1700(4) 0.5542(3) 0.080(3) Uani 1 1 d . . .
H1D_13 H 0.6516 0.1875 0.5418 0.096 Uiso 1 1 calc R . .
C2_13 C 0.6301(3) 0.1237(4) 0.5456(3) 0.096(4) Uani 1 1 d . . .
H2D_13 H 0.6055 0.1051 0.5273 0.115 Uiso 1 1 calc R . .
C3_13 C 0.6476(5) 0.1090(5) 0.5698(5) 0.139(6) Uani 1 1 d . . .
H3D_13 H 0.6386 0.0796 0.5705 0.167 Uiso 1 1 calc R . .
C4_13 C 0.6823(5) 0.1507(6) 0.5923(3) 0.105(4) Uani 1 1 d . . .
H4D_13 H 0.6994 0.1522 0.6118 0.127 Uiso 1 1 calc R . .
C5_13 C 0.6890(4) 0.1875(5) 0.5840(3) 0.104(4) Uani 1 1 d . . .
H5D_13 H 0.7104 0.2177 0.5952 0.125 Uiso 1 1 calc R . .
C6_13 C 0.7721(4) 0.2244(3) 0.5426(3) 0.086(3) Uani 1 1 d . . .
H6D_13 H 0.7768 0.2468 0.5622 0.103 Uiso 1 1 calc R . .
C7_13 C 0.7407(4) 0.2102(3) 0.5144(3) 0.081(3) Uani 1 1 d . . .
H7D_13 H 0.7198 0.2204 0.5116 0.097 Uiso 1 1 calc R . .
C8_13 C 0.7443(5) 0.1787(4) 0.4906(3) 0.106(4) Uani 1 1 d . . .
H8D_13 H 0.7275 0.1644 0.4684 0.127 Uiso 1 1 calc R . .
C9_13 C 0.7784(6) 0.1718(4) 0.5060(5) 0.121(6) Uani 1 1 d . . .
H9D_13 H 0.7878 0.1512 0.4964 0.146 Uiso 1 1 calc R . .
C10_13 C 0.7952(4) 0.2022(4) 0.5387(4) 0.101(4) Uani 1 1 d . . .
H10D_13 H 0.8186 0.2060 0.5548 0.121 Uiso 1 1 calc R . .
C11_13 C 0.7535(3) 0.1252(3) 0.5701(2) 0.084(3) Uani 1 1 d . . .
H11M_13 H 0.7648 0.1080 0.5557 0.126 Uiso 1 1 calc R . .
H11N_13 H 0.7337 0.1075 0.5835 0.126 Uiso 1 1 calc R . .
H11O_13 H 0.7794 0.1524 0.5849 0.126 Uiso 1 1 calc R . .
C12_13 C 0.5083(3) -0.0150(3) 0.4307(2) 0.056(2) Uani 1 1 d . . .
C13_13 C 0.4823(4) -0.0606(4) 0.4042(3) 0.146(5) Uani 1 1 d . . .
H13M_13 H 0.4696 -0.0575 0.3840 0.219 Uiso 1 1 calc R . .
H13N_13 H 0.4575 -0.0816 0.4130 0.219 Uiso 1 1 calc R . .
H13O_13 H 0.5035 -0.0717 0.3987 0.219 Uiso 1 1 calc R . .
C14_13 C 0.4743(3) 0.0012(3) 0.4383(3) 0.102(4) Uani 1 1 d . . .
H14P_13 H 0.4900 0.0302 0.4552 0.153 Uiso 1 1 calc R . .
H14Q_13 H 0.4493 -0.0201 0.4467 0.153 Uiso 1 1 calc R . .
H14R_13 H 0.4619 0.0040 0.4178 0.153 Uiso 1 1 calc R . .
C15_13 C 0.5283(3) -0.0202(3) 0.4623(2) 0.090(3) Uani 1 1 d . . .
H15P_13 H 0.5448 0.0087 0.4793 0.135 Uiso 1 1 calc R . .
H15Q_13 H 0.5494 -0.0313 0.4567 0.135 Uiso 1 1 calc R . .
H15R_13 H 0.5034 -0.0412 0.4711 0.135 Uiso 1 1 calc R . .
C16_13 C 0.5755(5) 0.1402(3) 0.4511(4) 0.111(5) Uani 1 1 d . . .
C17_13 C 0.5469(5) 0.1343(5) 0.4191(3) 0.205(9) Uani 1 1 d . . .
H17P_13 H 0.5494 0.1627 0.4189 0.308 Uiso 1 1 calc R . .
H17Q_13 H 0.5148 0.1124 0.4179 0.308 Uiso 1 1 calc R . .
H17R_13 H 0.5582 0.1238 0.3998 0.308 Uiso 1 1 calc R . .
C18_13 C 0.5530(4) 0.1447(4) 0.4820(3) 0.138(5) Uani 1 1 d . . .
H18P_13 H 0.5596 0.1754 0.4906 0.206 Uiso 1 1 calc R . .
H18Q_13 H 0.5653 0.1366 0.4994 0.206 Uiso 1 1 calc R . .
H18R_13 H 0.5198 0.1249 0.4757 0.206 Uiso 1 1 calc R . .
C19_13 C 0.6217(5) 0.1754(5) 0.4559(4) 0.205(9) Uani 1 1 d . . .
H19P_13 H 0.6226 0.2040 0.4623 0.307 Uiso 1 1 calc R . .
H19Q_13 H 0.6335 0.1722 0.4351 0.307 Uiso 1 1 calc R . .
H19R_13 H 0.6406 0.1740 0.4737 0.307 Uiso 1 1 calc R . .
C20_13 C 0.6260(4) 0.0674(5) 0.3678(3) 0.103(4) Uani 1 1 d . . .
C21_13 C 0.6151(6) 0.0862(5) 0.3416(4) 0.200(8) Uani 1 1 d . . .
H21S_13 H 0.5820 0.0705 0.3338 0.300 Uiso 1 1 calc R . .
H21T_13 H 0.6303 0.0822 0.3228 0.300 Uiso 1 1 calc R . .
H21U_13 H 0.6261 0.1178 0.3514 0.300 Uiso 1 1 calc R . .
C22_13 C 0.6046(6) 0.0183(5) 0.3548(4) 0.178(7) Uani 1 1 d . . .
H22S_13 H 0.6119 0.0067 0.3719 0.267 Uiso 1 1 calc R . .
H22T_13 H 0.6165 0.0109 0.3348 0.267 Uiso 1 1 calc R . .
H22U_13 H 0.5713 0.0051 0.3491 0.267 Uiso 1 1 calc R . .
C23_13 C 0.6768(5) 0.0907(7) 0.3808(5) 0.291(13) Uani 1 1 d . . .
H23S_13 H 0.6827 0.0780 0.3976 0.436 Uiso 1 1 calc R . .
H23T_13 H 0.6881 0.1224 0.3909 0.436 Uiso 1 1 calc R . .
H23U_13 H 0.6925 0.0870 0.3622 0.436 Uiso 1 1 calc R . .
C24_13 C 0.6009(4) -0.1018(3) 0.4141(3) 0.087(3) Uani 1 1 d . . .
C25_13 C 0.5993(5) -0.0793(5) 0.3909(4) 0.192(9) Uani 1 1 d . F .
H25M_13 H 0.5936 -0.0982 0.3682 0.288 Uiso 1 1 calc R . .
H25N_13 H 0.6287 -0.0518 0.3949 0.288 Uiso 1 1 calc R . .
H25O_13 H 0.5747 -0.0722 0.3935 0.288 Uiso 1 1 calc R . .
C26_13 C 0.6280(4) -0.1258(4) 0.4085(4) 0.153(6) Uani 1 1 d . F .
H26M_13 H 0.6201 -0.1432 0.3850 0.229 Uiso 1 1 calc R . .
H26N_13 H 0.6206 -0.1457 0.4227 0.229 Uiso 1 1 calc R . .
H26O_13 H 0.6608 -0.1041 0.4141 0.229 Uiso 1 1 calc R . .
C27_13 C 0.5546(4) -0.1316(4) 0.4214(4) 0.147(6) Uani 1 1 d . F .
H27M_13 H 0.5367 -0.1570 0.4017 0.220 Uiso 1 1 calc R . .
H27N_13 H 0.5385 -0.1149 0.4270 0.220 Uiso 1 1 calc R . .
H27O_13 H 0.5587 -0.1422 0.4403 0.220 Uiso 1 1 calc R . .
C28_13 C 0.7510(4) 0.0085(4) 0.4633(3) 0.094(4) Uani 1 1 d . . .
C29_13 C 0.7449(4) 0.0191(5) 0.4315(4) 0.190(8) Uani 1 1 d . F .
H29P_13 H 0.7323 0.0392 0.4349 0.284 Uiso 1 1 calc R . .
H29Q_13 H 0.7239 -0.0083 0.4141 0.284 Uiso 1 1 calc R . .
H29R_13 H 0.7746 0.0335 0.4245 0.284 Uiso 1 1 calc R . .
C30_13 C 0.7778(5) 0.0486(4) 0.4915(3) 0.167(7) Uani 1 1 d . F .
H30M_13 H 0.7638 0.0675 0.4933 0.250 Uiso 1 1 calc R . .
H30N_13 H 0.8092 0.0649 0.4877 0.250 Uiso 1 1 calc R . .
H30O_13 H 0.7782 0.0402 0.5121 0.250 Uiso 1 1 calc R . .
C31_13 C 0.7712(4) -0.0233(4) 0.4588(4) 0.151(6) Uani 1 1 d . F .
H31M_13 H 0.8043 -0.0062 0.4597 0.226 Uiso 1 1 calc R . .
H31N_13 H 0.7568 -0.0458 0.4371 0.226 Uiso 1 1 calc R . .
H31O_13 H 0.7651 -0.0378 0.4766 0.226 Uiso 1 1 calc R . .
C32_13 C 0.6414(4) -0.0449(3) 0.5310(2) 0.069(3) Uani 1 1 d . . .
C33_13 C 0.6686(4) -0.0078(4) 0.5637(3) 0.139(5) Uani 1 1 d . F .
H33M_13 H 0.7003 0.0100 0.5612 0.209 Uiso 1 1 calc R . .
H33N_13 H 0.6679 -0.0210 0.5820 0.209 Uiso 1 1 calc R . .
H33O_13 H 0.6548 0.0112 0.5687 0.209 Uiso 1 1 calc R . .
C34_13 C 0.6626(4) -0.0750(4) 0.5228(3) 0.107(4) Uani 1 1 d . F .
H34M_13 H 0.6946 -0.0572 0.5207 0.160 Uiso 1 1 calc R . .
H34N_13 H 0.6456 -0.0981 0.5017 0.160 Uiso 1 1 calc R . .
H34O_13 H 0.6613 -0.0890 0.5407 0.160 Uiso 1 1 calc R . .
C35_13 C 0.5907(4) -0.0739(4) 0.5341(3) 0.132(5) Uani 1 1 d . F .
H35M_13 H 0.5766 -0.0553 0.5394 0.198 Uiso 1 1 calc R . .
H35N_13 H 0.5896 -0.0878 0.5520 0.198 Uiso 1 1 calc R . .
H35O_13 H 0.5739 -0.0970 0.5130 0.198 Uiso 1 1 calc R . .
B1_13 B 0.6533(4) 0.0567(4) 0.4720(3) 0.058(3) Uiso 1 1 d . . .
Zr1_14 Zr 0.37952(3) 0.15837(2) 0.360740(19) 0.0453(2) Uani 1 1 d . . .
Si1_14 Si 0.25615(7) 0.06183(7) 0.26542(5) 0.0395(5) Uani 1 1 d . . .
Si2_14 Si 0.34156(8) -0.01624(7) 0.28532(6) 0.0459(6) Uani 1 1 d . . .
O1_14 O 0.34948(18) 0.10066(15) 0.32402(13) 0.0617(16) Uani 1 1 d . . .
O2_14 O 0.28468(15) 0.04207(14) 0.28262(12) 0.0407(12) Uani 1 1 d . . .
O3_14 O 0.34244(17) 0.02958(15) 0.30620(12) 0.0515(14) Uani 1 1 d . . .
O4_14 O 0.21061(17) 0.01981(16) 0.23916(13) 0.0583(15) Uani 1 1 d . . .
O5_14 O 0.24237(16) 0.08968(15) 0.29611(12) 0.0448(13) Uani 1 1 d . . .
O6_14 O 0.28646(16) 0.09631(15) 0.24470(12) 0.0455(13) Uani 1 1 d . . .
O7_14 O 0.2940(2) -0.06187(17) 0.28196(14) 0.0665(16) Uani 1 1 d . . .
O8_14 O 0.34820(19) -0.01162(17) 0.24732(13) 0.0620(16) Uani 1 1 d . . .
O9_14 O 0.3835(2) -0.01884(17) 0.30424(13) 0.0581(15) Uani 1 1 d . . .
C1_14 C 0.3216(3) 0.1738(3) 0.3892(2) 0.068(3) Uani 1 1 d . . .
H1_14 H 0.3112 0.1905 0.3804 0.082 Uiso 1 1 calc R . .
C2_14 C 0.3018(3) 0.1270(3) 0.3790(2) 0.069(3) Uani 1 1 d . . .
H2_14 H 0.2755 0.1068 0.3623 0.083 Uiso 1 1 calc R . .
C3_14 C 0.3278(3) 0.1154(3) 0.3981(2) 0.081(3) Uani 1 1 d . . .
H3_14 H 0.3223 0.0863 0.3961 0.097 Uiso 1 1 calc R . .
C4_14 C 0.3642(3) 0.1557(3) 0.4210(2) 0.078(3) Uani 1 1 d . . .
H4_14 H 0.3868 0.1580 0.4369 0.093 Uiso 1 1 calc R . .
C5_14 C 0.3599(3) 0.1913(3) 0.4152(2) 0.065(3) Uani 1 1 d . . .
H5_14 H 0.3793 0.2217 0.4267 0.077 Uiso 1 1 calc R . .
C6_14 C 0.4290(3) 0.2414(3) 0.3642(2) 0.063(2) Uani 1 1 d . . .
H6_14 H 0.4386 0.2629 0.3854 0.075 Uiso 1 1 calc R . .
C7_14 C 0.3879(3) 0.2246(2) 0.3415(2) 0.047(2) Uani 1 1 d . . .
H7_14 H 0.3650 0.2326 0.3451 0.057 Uiso 1 1 calc R . .
C8_14 C 0.3866(3) 0.1936(3) 0.3124(2) 0.057(2) Uani 1 1 d . . .
H8_14 H 0.3633 0.1779 0.2930 0.068 Uiso 1 1 calc R . .
C9_14 C 0.4270(3) 0.1910(3) 0.3181(3) 0.075(3) Uani 1 1 d . . .
H9_14 H 0.4351 0.1724 0.3032 0.090 Uiso 1 1 calc R . .
C10_14 C 0.4534(3) 0.2206(3) 0.3498(3) 0.071(3) Uani 1 1 d . . .
H10_14 H 0.4821 0.2256 0.3596 0.085 Uiso 1 1 calc R . .
C11_14 C 0.4385(3) 0.1510(3) 0.3839(2) 0.088(3) Uani 1 1 d . . .
H11A_14 H 0.4549 0.1451 0.3665 0.132 Uiso 1 1 calc R . .
H11B_14 H 0.4259 0.1263 0.3939 0.132 Uiso 1 1 calc R . .
H11C_14 H 0.4598 0.1785 0.4012 0.132 Uiso 1 1 calc R . .
C12_14 C 0.1763(3) -0.0241(3) 0.2423(3) 0.088(3) Uani 1 1 d . . .
C13_14 C 0.1308(3) -0.0359(3) 0.2208(3) 0.130(5) Uani 1 1 d . . .
H13A_14 H 0.1348 -0.0369 0.1976 0.194 Uiso 1 1 calc R . .
H13B_14 H 0.1224 -0.0132 0.2297 0.194 Uiso 1 1 calc R . .
H13C_14 H 0.1064 -0.0649 0.2216 0.194 Uiso 1 1 calc R . .
C14_14 C 0.1704(4) -0.0223(3) 0.2789(3) 0.113(4) Uani 1 1 d . . .
H14A_14 H 0.1993 -0.0148 0.2922 0.170 Uiso 1 1 calc R . .
H14B_14 H 0.1463 -0.0513 0.2798 0.170 Uiso 1 1 calc R . .
H14C_14 H 0.1621 0.0003 0.2878 0.170 Uiso 1 1 calc R . .
C15_14 C 0.1937(4) -0.0568(3) 0.2275(3) 0.123(5) Uani 1 1 d . . .
H15A_14 H 0.1970 -0.0570 0.2043 0.184 Uiso 1 1 calc R . .
H15B_14 H 0.1716 -0.0868 0.2282 0.184 Uiso 1 1 calc R . .
H15C_14 H 0.2233 -0.0472 0.2407 0.184 Uiso 1 1 calc R . .
C16_14 C 0.2208(3) 0.1175(3) 0.2950(2) 0.060(2) Uani 1 1 d . . .
C17_14 C 0.1853(3) 0.0973(3) 0.2623(3) 0.109(4) Uani 1 1 d . . .
H17A_14 H 0.1616 0.0672 0.2614 0.164 Uiso 1 1 calc R . .
H17B_14 H 0.2006 0.0961 0.2430 0.164 Uiso 1 1 calc R . .
H17C_14 H 0.1713 0.1158 0.2616 0.164 Uiso 1 1 calc R . .
C18_14 C 0.1962(3) 0.1157(3) 0.3256(2) 0.085(3) Uani 1 1 d . . .
H18A_14 H 0.1721 0.0851 0.3229 0.127 Uiso 1 1 calc R . .
H18B_14 H 0.1826 0.1349 0.3272 0.127 Uiso 1 1 calc R . .
H18C_14 H 0.2184 0.1260 0.3461 0.127 Uiso 1 1 calc R . .
C19_14 C 0.2587(3) 0.1643(3) 0.2975(3) 0.078(3) Uani 1 1 d . . .
H19A_14 H 0.2804 0.1760 0.3185 0.117 Uiso 1 1 calc R . .
H19B_14 H 0.2453 0.1834 0.2972 0.117 Uiso 1 1 calc R . .
H19C_14 H 0.2746 0.1636 0.2786 0.117 Uiso 1 1 calc R . .
C20_14 C 0.3059(3) 0.0929(3) 0.2145(2) 0.057(2) Uani 1 1 d . . .
C21A_14 C 0.2675(8) 0.0641(9) 0.1852(6) 0.129(9) Uiso 0.50 1 d P . .
H21A_14 H 0.2528 0.0333 0.1861 0.193 Uiso 0.50 1 calc PR . .
H21B_14 H 0.2795 0.0660 0.1645 0.193 Uiso 0.50 1 calc PR . .
H21C_14 H 0.2450 0.0741 0.1860 0.193 Uiso 0.50 1 calc PR . .
C21B_14 C 0.2809(6) 0.0442(6) 0.1907(5) 0.075(6) Uiso 0.50 1 d P . .
H21D_14 H 0.2950 0.0278 0.1971 0.112 Uiso 0.50 1 calc PR . .
H21E_14 H 0.2835 0.0449 0.1676 0.112 Uiso 0.50 1 calc PR . .
H21F_14 H 0.2485 0.0294 0.1926 0.112 Uiso 0.50 1 calc PR . .
C22_14 C 0.3512(4) 0.0941(5) 0.2246(3) 0.140(5) Uani 1 1 d . . .
H22A_14 H 0.3686 0.1179 0.2453 0.210 Uiso 1 1 calc R . .
H22B_14 H 0.3692 0.0995 0.2068 0.210 Uiso 1 1 calc R . .
H22C_14 H 0.3445 0.0656 0.2281 0.210 Uiso 1 1 calc R . .
C23_14 C 0.3186(6) 0.1344(5) 0.2044(3) 0.192(8) Uani 1 1 d . . .
H23A_14 H 0.3441 0.1599 0.2209 0.289 Uiso 1 1 calc R . .
H23B_14 H 0.2922 0.1391 0.2031 0.289 Uiso 1 1 calc R . .
H23C_14 H 0.3278 0.1315 0.1825 0.289 Uiso 1 1 calc R . .
C24_14 C 0.2730(4) -0.0865(3) 0.3062(3) 0.075(3) Uani 1 1 d . . .
C25_14 C 0.2266(4) -0.1241(4) 0.2864(3) 0.132(5) Uani 1 1 d . . .
H25A_14 H 0.2310 -0.1429 0.2675 0.198 Uiso 1 1 calc R . .
H25B_14 H 0.2091 -0.1117 0.2781 0.198 Uiso 1 1 calc R . .
H25C_14 H 0.2098 -0.1420 0.3009 0.198 Uiso 1 1 calc R . .
C26_14 C 0.3027(4) -0.1060(3) 0.3168(3) 0.107(4) Uani 1 1 d . . .
H26A_14 H 0.3325 -0.0816 0.3295 0.160 Uiso 1 1 calc R . .
H26B_14 H 0.3070 -0.1232 0.2969 0.160 Uiso 1 1 calc R . .
H26C_14 H 0.2872 -0.1252 0.3308 0.160 Uiso 1 1 calc R . .
C27_14 C 0.2687(4) -0.0556(3) 0.3364(3) 0.114(4) Uani 1 1 d . . .
H27A_14 H 0.2993 -0.0320 0.3483 0.171 Uiso 1 1 calc R . .
H27B_14 H 0.2524 -0.0727 0.3515 0.171 Uiso 1 1 calc R . .
H27C_14 H 0.2517 -0.0425 0.3286 0.171 Uiso 1 1 calc R . .
C28_14 C 0.3493(4) -0.0415(3) 0.2168(2) 0.077(3) Uani 1 1 d . . .
C29_14 C 0.3776(5) -0.0110(4) 0.1963(3) 0.148(6) Uani 1 1 d . . .
H29A_14 H 0.3645 0.0074 0.1928 0.222 Uiso 1 1 calc R . .
H29B_14 H 0.3773 -0.0291 0.1747 0.222 Uiso 1 1 calc R . .
H29C_14 H 0.4092 0.0081 0.2084 0.222 Uiso 1 1 calc R . .
C30_14 C 0.3654(5) -0.0720(4) 0.2245(3) 0.152(6) Uani 1 1 d . . .
H30A_14 H 0.3452 -0.0898 0.2377 0.228 Uiso 1 1 calc R . .
H30B_14 H 0.3967 -0.0542 0.2372 0.228 Uiso 1 1 calc R . .
H30C_14 H 0.3647 -0.0916 0.2036 0.228 Uiso 1 1 calc R . .
C31_14 C 0.2996(4) -0.0709(4) 0.1972(3) 0.131(5) Uani 1 1 d . . .
H31A_14 H 0.2881 -0.0521 0.1918 0.196 Uiso 1 1 calc R . .
H31B_14 H 0.2803 -0.0885 0.2109 0.196 Uiso 1 1 calc R . .
H31C_14 H 0.2990 -0.0909 0.1765 0.196 Uiso 1 1 calc R . .
C32_14 C 0.4272(3) 0.0140(3) 0.3258(3) 0.070(3) Uani 1 1 d . . .
C33_14 C 0.4187(3) 0.0288(3) 0.3617(2) 0.085(3) Uani 1 1 d . . .
H33A_14 H 0.4028 0.0028 0.3700 0.127 Uiso 1 1 calc R . .
H33B_14 H 0.3999 0.0429 0.3611 0.127 Uiso 1 1 calc R . .
H33C_14 H 0.4481 0.0500 0.3767 0.127 Uiso 1 1 calc R . .
C34_14 C 0.4554(4) -0.0108(4) 0.3269(3) 0.121(4) Uani 1 1 d . . .
H34A_14 H 0.4386 -0.0361 0.3358 0.181 Uiso 1 1 calc R . .
H34B_14 H 0.4853 0.0097 0.3413 0.181 Uiso 1 1 calc R . .
H34C_14 H 0.4596 -0.0214 0.3043 0.181 Uiso 1 1 calc R . .
C35_14 C 0.4521(3) 0.0542(3) 0.3121(3) 0.093(3) Uani 1 1 d . . .
H35A_14 H 0.4571 0.0442 0.2896 0.139 Uiso 1 1 calc R . .
H35B_14 H 0.4817 0.0755 0.3268 0.139 Uiso 1 1 calc R . .
H35C_14 H 0.4335 0.0683 0.3113 0.139 Uiso 1 1 calc R . .
B1_14 B 0.3249(3) 0.0583(3) 0.3037(2) 0.041(2) Uiso 1 1 d . . .
Zr1_15 Zr -0.31419(3) 0.13907(2) 0.025868(18) 0.04068(19) Uani 1 1 d . . .
Si1_15 Si -0.44672(7) 0.06758(6) -0.06338(5) 0.0359(5) Uani 1 1 d . . .
Si2_15 Si -0.33282(7) -0.00423(7) -0.04948(5) 0.0417(5) Uani 1 1 d . . .
O1_15 O -0.33944(16) 0.09364(15) -0.01958(12) 0.0522(14) Uani 1 1 d . G .
O2_15 O -0.41111(16) 0.04926(14) -0.05920(12) 0.0459(13) Uani 1 1 d . G .
O3_15 O -0.36456(18) 0.01793(17) -0.05273(12) 0.0558(15) Uani 1 1 d . G .
O4_15 O -0.48862(16) 0.03218(14) -0.09445(13) 0.0467(13) Uani 1 1 d . . .
O5_15 O -0.46397(16) 0.07398(16) -0.02717(12) 0.0457(13) Uani 1 1 d . . .
O6_15 O -0.42197(16) 0.11625(14) -0.07100(12) 0.0425(12) Uani 1 1 d . . .
O7A_15 O -0.3709(3) -0.0600(3) -0.0628(2) 0.040(2) Uiso 0.50 1 d P G 1
O8A_15 O -0.2967(3) 0.0024(3) -0.0761(2) 0.044(3) Uiso 0.50 1 d P G 1
O7B_15 O -0.3445(3) -0.0448(3) -0.0805(3) 0.050(3) Uiso 0.50 1 d P G 2
O8B_15 O -0.2791(3) 0.0360(3) -0.0472(3) 0.051(3) Uiso 0.50 1 d P G 2
O9_15 O -0.3229(3) -0.0035(2) -0.01182(14) 0.098(3) Uani 1 1 d . G .
C1_15 C -0.3723(3) 0.1234(3) 0.0656(2) 0.069(3) Uani 1 1 d . . .
H1E_15 H -0.3884 0.1393 0.0684 0.082 Uiso 1 1 calc R . .
C2_15 C -0.3864(3) 0.0824(3) 0.0414(2) 0.056(2) Uani 1 1 d . . .
H2E_15 H -0.4133 0.0664 0.0247 0.067 Uiso 1 1 calc R . .
C3_15 C -0.3529(3) 0.0693(3) 0.0466(2) 0.067(3) Uani 1 1 d . . .
H3E_15 H -0.3542 0.0427 0.0345 0.080 Uiso 1 1 calc R . .
C4_15 C -0.3176(3) 0.1033(3) 0.0731(2) 0.068(3) Uani 1 1 d . . .
H4E_15 H -0.2907 0.1036 0.0813 0.082 Uiso 1 1 calc R . .
C5_15 C -0.3291(3) 0.1366(3) 0.0853(2) 0.065(3) Uani 1 1 d . . .
H5E_15 H -0.3116 0.1629 0.1032 0.078 Uiso 1 1 calc R . .
C6_15 C -0.2899(6) 0.2212(3) 0.0514(4) 0.115(5) Uani 1 1 d . . .
H6E_15 H -0.2830 0.2322 0.0751 0.138 Uiso 1 1 calc R . .
C7_15 C -0.3328(6) 0.2024(4) 0.0319(4) 0.119(5) Uani 1 1 d . . .
H7E_15 H -0.3597 0.1993 0.0399 0.143 Uiso 1 1 calc R . .
C8_15 C -0.3295(5) 0.1890(3) -0.0011(3) 0.090(4) Uani 1 1 d . . .
H8E_15 H -0.3543 0.1746 -0.0194 0.108 Uiso 1 1 calc R . .
C9_15 C -0.2825(6) 0.2002(4) -0.0037(3) 0.120(5) Uani 1 1 d . . .
H9E_15 H -0.2705 0.1948 -0.0232 0.144 Uiso 1 1 calc R . .
C10_15 C -0.2583(4) 0.2216(3) 0.0307(3) 0.083(3) Uani 1 1 d . . .
H10E_15 H -0.2265 0.2339 0.0379 0.099 Uiso 1 1 calc R . .
C11_15 C -0.2437(3) 0.1447(3) 0.0353(2) 0.079(3) Uani 1 1 d . . .
H11P_15 H -0.2476 0.1157 0.0356 0.119 Uiso 1 1 calc R . .
H11Q_15 H -0.2262 0.1666 0.0568 0.119 Uiso 1 1 calc R . .
H11R_15 H -0.2271 0.1540 0.0174 0.119 Uiso 1 1 calc R . .
C12_15 C -0.5126(3) -0.0166(2) -0.10982(19) 0.045(2) Uani 1 1 d . . .
C13_15 C -0.5638(3) -0.0303(2) -0.1199(2) 0.071(3) Uani 1 1 d . . .
H13P_15 H -0.5760 -0.0241 -0.0998 0.107 Uiso 1 1 calc R . .
H13Q_15 H -0.5814 -0.0621 -0.1316 0.107 Uiso 1 1 calc R . .
H13R_15 H -0.5661 -0.0134 -0.1346 0.107 Uiso 1 1 calc R . .
C14_15 C -0.5082(3) -0.0405(2) -0.0843(2) 0.051(2) Uani 1 1 d . . .
H14S_15 H -0.4760 -0.0318 -0.0780 0.077 Uiso 1 1 calc R . .
H14T_15 H -0.5262 -0.0727 -0.0944 0.077 Uiso 1 1 calc R . .
H14U_15 H -0.5197 -0.0322 -0.0643 0.077 Uiso 1 1 calc R . .
C15_15 C -0.4916(3) -0.0258(3) -0.1409(2) 0.075(3) Uani 1 1 d . . .
H15S_15 H -0.4595 -0.0168 -0.1338 0.112 Uiso 1 1 calc R . .
H15T_15 H -0.4934 -0.0088 -0.1558 0.112 Uiso 1 1 calc R . .
H15U_15 H -0.5086 -0.0575 -0.1528 0.112 Uiso 1 1 calc R . .
C16_15 C -0.4999(3) 0.0847(3) -0.0166(2) 0.049(2) Uani 1 1 d . . .
C17_15 C -0.5206(3) 0.0969(3) -0.0436(2) 0.080(3) Uani 1 1 d . . .
H17S_15 H -0.5352 0.0716 -0.0638 0.120 Uiso 1 1 calc R . .
H17T_15 H -0.4963 0.1225 -0.0489 0.120 Uiso 1 1 calc R . .
H17U_15 H -0.5435 0.1042 -0.0353 0.120 Uiso 1 1 calc R . .
C18_15 C -0.5365(3) 0.0434(3) -0.0092(2) 0.080(3) Uani 1 1 d . . .
H18S_15 H -0.5511 0.0190 -0.0299 0.119 Uiso 1 1 calc R . .
H18T_15 H -0.5596 0.0496 0.0002 0.119 Uiso 1 1 calc R . .
H18U_15 H -0.5225 0.0350 0.0069 0.119 Uiso 1 1 calc R . .
C19_15 C -0.4762(3) 0.1240(3) 0.0162(2) 0.092(3) Uani 1 1 d . . .
H19S_15 H -0.4634 0.1153 0.0328 0.138 Uiso 1 1 calc R . .
H19T_15 H -0.4987 0.1315 0.0250 0.138 Uiso 1 1 calc R . .
H19U_15 H -0.4515 0.1499 0.0113 0.138 Uiso 1 1 calc R . .
C20_15 C -0.4106(3) 0.1296(2) -0.1012(2) 0.051(2) Uani 1 1 d . . .
C21_15 C -0.4541(4) 0.1183(3) -0.1242(3) 0.119(4) Uani 1 1 d . . .
H21V_15 H -0.4693 0.1333 -0.1122 0.178 Uiso 1 1 calc R . .
H21W_15 H -0.4750 0.0861 -0.1308 0.178 Uiso 1 1 calc R . .
H21X_15 H -0.4459 0.1282 -0.1441 0.178 Uiso 1 1 calc R . .
C22_15 C -0.3844(4) 0.1071(3) -0.1183(3) 0.119(5) Uani 1 1 d . . .
H22V_15 H -0.4046 0.0748 -0.1254 0.179 Uiso 1 1 calc R . .
H22W_15 H -0.3575 0.1147 -0.1024 0.179 Uiso 1 1 calc R . .
H22X_15 H -0.3746 0.1174 -0.1378 0.179 Uiso 1 1 calc R . .
C23_15 C -0.3778(3) 0.1802(2) -0.0904(2) 0.068(3) Uani 1 1 d . . .
H23V_15 H -0.3935 0.1953 -0.0795 0.102 Uiso 1 1 calc R . .
H23W_15 H -0.3680 0.1901 -0.1101 0.102 Uiso 1 1 calc R . .
H23X_15 H -0.3509 0.1874 -0.0748 0.102 Uiso 1 1 calc R . .
C24_15 C -0.3908(3) -0.0892(3) -0.0974(2) 0.060(2) Uani 1 1 d . . .
C25_15 C -0.4053(3) -0.0727(3) -0.1234(2) 0.080(3) Uani 1 1 d . G .
H25P_15 H -0.4347 -0.0965 -0.1372 0.121 Uiso 1 1 calc R . .
H25Q_15 H -0.3821 -0.0638 -0.1376 0.121 Uiso 1 1 calc R . .
H25R_15 H -0.4084 -0.0472 -0.1124 0.121 Uiso 1 1 calc R . .
C26_15 C -0.3666(3) -0.1156(3) -0.1099(2) 0.079(3) Uani 1 1 d . G .
H26P_15 H -0.3896 -0.1463 -0.1220 0.118 Uiso 1 1 calc R . .
H26Q_15 H -0.3485 -0.1155 -0.0908 0.118 Uiso 1 1 calc R . .
H26R_15 H -0.3465 -0.1019 -0.1249 0.118 Uiso 1 1 calc R . .
C27_15 C -0.4306(5) -0.1168(5) -0.0825(4) 0.197(8) Uani 1 1 d . G .
H27P_15 H -0.4539 -0.1425 -0.1002 0.296 Uiso 1 1 calc R . .
H27Q_15 H -0.4437 -0.0989 -0.0719 0.296 Uiso 1 1 calc R . .
H27R_15 H -0.4201 -0.1270 -0.0658 0.296 Uiso 1 1 calc R . .
C28_15 C -0.2578(3) 0.0495(4) -0.0771(3) 0.084(3) Uani 1 1 d . . .
C29_15 C -0.2287(5) 0.0926(5) -0.0517(3) 0.179(8) Uani 1 1 d . G .
H29S_15 H -0.2083 0.1142 -0.0626 0.269 Uiso 1 1 calc R . .
H29T_15 H -0.2104 0.0890 -0.0350 0.269 Uiso 1 1 calc R . .
H29U_15 H -0.2481 0.1032 -0.0409 0.269 Uiso 1 1 calc R . .
C30_15 C -0.2862(4) 0.0544(3) -0.1041(3) 0.121(4) Uani 1 1 d . G .
H30P_15 H -0.2677 0.0828 -0.1088 0.181 Uiso 1 1 calc R . .
H30Q_15 H -0.3135 0.0534 -0.0962 0.181 Uiso 1 1 calc R . .
H30R_15 H -0.2956 0.0300 -0.1245 0.181 Uiso 1 1 calc R . .
C31_15 C -0.2278(4) 0.0300(3) -0.0920(3) 0.128(5) Uani 1 1 d . G .
H31P_15 H -0.1994 0.0539 -0.0955 0.193 Uiso 1 1 calc R . .
H31Q_15 H -0.2447 0.0076 -0.1135 0.193 Uiso 1 1 calc R . .
H31R_15 H -0.2205 0.0163 -0.0766 0.193 Uiso 1 1 calc R . .
C32_15 C -0.3011(4) -0.0213(3) 0.0061(2) 0.073(3) Uani 1 1 d . . .
C33_15 C -0.2624(3) 0.0193(3) 0.0343(2) 0.094(3) Uani 1 1 d . G .
H33P_15 H -0.2760 0.0335 0.0492 0.142 Uiso 1 1 calc R . .
H33Q_15 H -0.2405 0.0408 0.0240 0.142 Uiso 1 1 calc R . .
H33R_15 H -0.2465 0.0090 0.0471 0.142 Uiso 1 1 calc R . .
C34_15 C -0.2776(4) -0.0430(4) -0.0173(2) 0.128(5) Uani 1 1 d . G .
H34P_15 H -0.3010 -0.0685 -0.0351 0.192 Uiso 1 1 calc R . .
H34Q_15 H -0.2616 -0.0529 -0.0041 0.192 Uiso 1 1 calc R . .
H34R_15 H -0.2557 -0.0210 -0.0272 0.192 Uiso 1 1 calc R . .
C35_15 C -0.3362(4) -0.0541(4) 0.0210(3) 0.118(4) Uani 1 1 d . G .
H35P_15 H -0.3501 -0.0397 0.0353 0.178 Uiso 1 1 calc R . .
H35Q_15 H -0.3214 -0.0650 0.0343 0.178 Uiso 1 1 calc R . .
H35R_15 H -0.3599 -0.0791 0.0031 0.178 Uiso 1 1 calc R . .
B1_15 B -0.3709(3) 0.0551(3) -0.0430(2) 0.036(2) Uiso 1 1 d . . .
Zr1_16 Zr 0.30007(3) 0.58823(2) 0.221963(19) 0.0447(2) Uani 1 1 d . . .
Si1_16 Si 0.46361(7) 0.67954(6) 0.25222(5) 0.0337(5) Uani 1 1 d . . .
Si2_16 Si 0.38631(7) 0.77183(6) 0.26033(5) 0.0368(5) Uani 1 1 d . . .
O1_16 O 0.35484(16) 0.64609(14) 0.22216(12) 0.0451(13) Uani 1 1 d . H .
O2_16 O 0.42960(15) 0.70167(13) 0.25603(11) 0.0337(11) Uani 1 1 d . H .
O3_16 O 0.37593(18) 0.72267(16) 0.23881(15) 0.0708(18) Uani 1 1 d . H .
O4_16 O 0.51711(16) 0.71950(15) 0.26623(11) 0.0413(12) Uani 1 1 d . . .
O5_16 O 0.44656(17) 0.64254(15) 0.27325(12) 0.0456(13) Uani 1 1 d . . .
O6_16 O 0.46049(15) 0.65364(13) 0.21298(11) 0.0347(11) Uani 1 1 d . . .
O7A_16 O 0.3795(2) 0.76392(19) 0.29751(16) 0.0339(17) Uani 0.70 1 d P H 1
O8A_16 O 0.4375(2) 0.8140(2) 0.26263(17) 0.0363(17) Uani 0.70 1 d P H 1
O7B_16 O 0.4149(8) 0.7969(7) 0.2964(6) 0.083(6) Uiso 0.30 1 d P H 2
O8B_16 O 0.4175(7) 0.7891(7) 0.2333(6) 0.087(7) Uiso 0.30 1 d P H 2
O9_16 O 0.34709(18) 0.78219(16) 0.24692(15) 0.0694(18) Uani 1 1 d . H .
C1_16 C 0.2983(6) 0.5674(4) 0.2763(3) 0.113(5) Uani 1 1 d . . .
H1_16 H 0.3073 0.5462 0.2776 0.135 Uiso 1 1 calc R . .
C2_16 C 0.3278(4) 0.6121(4) 0.2854(2) 0.075(3) Uani 1 1 d . . .
H2_16 H 0.3599 0.6267 0.2929 0.089 Uiso 1 1 calc R . .
C3_16 C 0.3018(4) 0.6324(4) 0.2815(2) 0.076(3) Uani 1 1 d . . .
H3_16 H 0.3132 0.6634 0.2864 0.092 Uiso 1 1 calc R . .
C4_16 C 0.2571(5) 0.6000(7) 0.2695(3) 0.125(6) Uani 1 1 d . . .
H4_16 H 0.2326 0.6051 0.2649 0.150 Uiso 1 1 calc R . .
C5_16 C 0.2527(6) 0.5562(5) 0.2647(3) 0.151(9) Uani 1 1 d . . .
H5_16 H 0.2263 0.5278 0.2561 0.182 Uiso 1 1 calc R . .
C6_16 C 0.2690(4) 0.5049(3) 0.1921(3) 0.072(3) Uani 1 1 d . . .
H6_16 H 0.2440 0.4835 0.1992 0.086 Uiso 1 1 calc R . .
C7_16 C 0.3162(3) 0.5233(3) 0.2050(2) 0.062(2) Uani 1 1 d . . .
H7_16 H 0.3281 0.5162 0.2223 0.075 Uiso 1 1 calc R . .
C8_16 C 0.3427(3) 0.5542(2) 0.1877(2) 0.054(2) Uani 1 1 d . . .
H8_16 H 0.3751 0.5711 0.1913 0.064 Uiso 1 1 calc R . .
C9_16 C 0.3116(3) 0.5551(2) 0.1641(2) 0.053(2) Uani 1 1 d . . .
H9_16 H 0.3198 0.5731 0.1493 0.064 Uiso 1 1 calc R . .
C10_16 C 0.2662(3) 0.5245(3) 0.1664(2) 0.069(3) Uani 1 1 d . . .
H10_16 H 0.2389 0.5182 0.1532 0.082 Uiso 1 1 calc R . .
C11_16 C 0.2445(3) 0.5977(3) 0.1956(2) 0.066(3) Uani 1 1 d . . .
H11A_16 H 0.2534 0.6057 0.1751 0.098 Uiso 1 1 calc R . .
H11B_16 H 0.2415 0.6213 0.2105 0.098 Uiso 1 1 calc R . .
H11C_16 H 0.2151 0.5699 0.1899 0.098 Uiso 1 1 calc R . .
C12_16 C 0.5392(3) 0.7597(3) 0.2953(2) 0.049(2) Uani 1 1 d . . .
C13_16 C 0.5900(3) 0.7716(3) 0.3026(2) 0.081(3) Uani 1 1 d . . .
H13A_16 H 0.6041 0.7780 0.2831 0.121 Uiso 1 1 calc R . .
H13B_16 H 0.5916 0.7465 0.3072 0.121 Uiso 1 1 calc R . .
H13C_16 H 0.6065 0.7978 0.3220 0.121 Uiso 1 1 calc R . .
C14_16 C 0.5154(3) 0.7493(3) 0.3257(2) 0.074(3) Uani 1 1 d . . .
H14A_16 H 0.4835 0.7421 0.3205 0.110 Uiso 1 1 calc R . .
H14B_16 H 0.5315 0.7753 0.3453 0.110 Uiso 1 1 calc R . .
H14C_16 H 0.5163 0.7240 0.3305 0.110 Uiso 1 1 calc R . .
C15_16 C 0.5349(3) 0.7974(2) 0.2852(2) 0.065(3) Uani 1 1 d . . .
H15A_16 H 0.5026 0.7891 0.2809 0.097 Uiso 1 1 calc R . .
H15B_16 H 0.5478 0.8017 0.2650 0.097 Uiso 1 1 calc R . .
H15C_16 H 0.5516 0.8250 0.3034 0.097 Uiso 1 1 calc R . .
C16_16 C 0.4633(3) 0.6119(3) 0.2786(2) 0.052(2) Uani 1 1 d . . .
C17_16 C 0.5167(3) 0.6349(3) 0.2798(2) 0.079(3) Uani 1 1 d . . .
H17A_16 H 0.5236 0.6408 0.2584 0.118 Uiso 1 1 calc R . .
H17B_16 H 0.5278 0.6152 0.2841 0.118 Uiso 1 1 calc R . .
H17C_16 H 0.5320 0.6629 0.2977 0.118 Uiso 1 1 calc R . .
C18_16 C 0.4498(4) 0.6016(3) 0.3109(2) 0.106(4) Uani 1 1 d . . .
H18A_16 H 0.4651 0.6291 0.3293 0.160 Uiso 1 1 calc R . .
H18B_16 H 0.4590 0.5807 0.3151 0.160 Uiso 1 1 calc R . .
H18C_16 H 0.4166 0.5885 0.3090 0.160 Uiso 1 1 calc R . .
C19_16 C 0.4405(3) 0.5703(3) 0.2482(2) 0.084(3) Uani 1 1 d . . .
H19A_16 H 0.4503 0.5788 0.2280 0.127 Uiso 1 1 calc R . .
H19B_16 H 0.4072 0.5568 0.2456 0.127 Uiso 1 1 calc R . .
H19C_16 H 0.4497 0.5490 0.2516 0.127 Uiso 1 1 calc R . .
C20_16 C 0.4775(3) 0.6724(2) 0.18483(18) 0.0397(19) Uani 1 1 d . . .
C21_16 C 0.4694(3) 0.7126(3) 0.1860(2) 0.061(2) Uani 1 1 d . . .
H21A_16 H 0.4874 0.7365 0.2065 0.091 Uiso 1 1 calc R . .
H21B_16 H 0.4368 0.7028 0.1855 0.091 Uiso 1 1 calc R . .
H21C_16 H 0.4788 0.7234 0.1666 0.091 Uiso 1 1 calc R . .
C22_16 C 0.5290(2) 0.6877(2) 0.18803(19) 0.050(2) Uani 1 1 d . . .
H22A_16 H 0.5457 0.7118 0.2087 0.075 Uiso 1 1 calc R . .
H22B_16 H 0.5403 0.6983 0.1689 0.075 Uiso 1 1 calc R . .
H22C_16 H 0.5337 0.6627 0.1885 0.075 Uiso 1 1 calc R . .
C23_16 C 0.4498(3) 0.6349(3) 0.1530(2) 0.077(3) Uani 1 1 d . . .
H23A_16 H 0.4173 0.6261 0.1518 0.116 Uiso 1 1 calc R . .
H23B_16 H 0.4538 0.6095 0.1532 0.116 Uiso 1 1 calc R . .
H23C_16 H 0.4604 0.6451 0.1336 0.116 Uiso 1 1 calc R . .
C24_16 C 0.3917(4) 0.7977(3) 0.3306(2) 0.069(3) Uani 1 1 d . . .
C25_16 C 0.4418(3) 0.8183(3) 0.3478(2) 0.080(3) Uani 1 1 d . H .
H25A_16 H 0.4622 0.8378 0.3356 0.120 Uiso 1 1 calc R . .
H25B_16 H 0.4489 0.7946 0.3478 0.120 Uiso 1 1 calc R . .
H25C_16 H 0.4462 0.8355 0.3708 0.120 Uiso 1 1 calc R . .
C26_16 C 0.3797(3) 0.8346(3) 0.3288(2) 0.083(3) Uani 1 1 d . H .
H26A_16 H 0.3477 0.8207 0.3179 0.125 Uiso 1 1 calc R . .
H26B_16 H 0.3998 0.8532 0.3160 0.125 Uiso 1 1 calc R . .
H26C_16 H 0.3841 0.8529 0.3515 0.125 Uiso 1 1 calc R . .
C27_16 C 0.3585(3) 0.7666(3) 0.3490(3) 0.097(3) Uani 1 1 d . H .
H27A_16 H 0.3270 0.7539 0.3376 0.145 Uiso 1 1 calc R . .
H27B_16 H 0.3624 0.7834 0.3721 0.145 Uiso 1 1 calc R . .
H27C_16 H 0.3651 0.7426 0.3490 0.145 Uiso 1 1 calc R . .
C28_16 C 0.4541(4) 0.8424(3) 0.2390(3) 0.084(4) Uani 1 1 d . . .
C29_16 C 0.4434(4) 0.8177(4) 0.2021(3) 0.125(5) Uani 1 1 d . H .
H29A_16 H 0.4557 0.7974 0.1988 0.188 Uiso 1 1 calc R . .
H29B_16 H 0.4575 0.8391 0.1893 0.188 Uiso 1 1 calc R . .
H29C_16 H 0.4102 0.8008 0.1944 0.188 Uiso 1 1 calc R . .
C30_16 C 0.4360(4) 0.8751(4) 0.2462(4) 0.154(6) Uani 1 1 d . H .
H30A_16 H 0.4437 0.8901 0.2702 0.231 Uiso 1 1 calc R . .
H30B_16 H 0.4027 0.8589 0.2390 0.231 Uiso 1 1 calc R . .
H30C_16 H 0.4500 0.8972 0.2339 0.231 Uiso 1 1 calc R . .
C31_16 C 0.5061(4) 0.8663(3) 0.2513(3) 0.119(4) Uani 1 1 d . H .
H31A_16 H 0.5133 0.8824 0.2751 0.178 Uiso 1 1 calc R . .
H31B_16 H 0.5217 0.8873 0.2386 0.178 Uiso 1 1 calc R . .
H31C_16 H 0.5164 0.8444 0.2482 0.178 Uiso 1 1 calc R . .
C32_16 C 0.2985(3) 0.7551(3) 0.2320(2) 0.062(3) Uani 1 1 d . . .
C33_16 C 0.2719(3) 0.7241(3) 0.2529(2) 0.087(3) Uani 1 1 d . H .
H33A_16 H 0.2755 0.7419 0.2756 0.130 Uiso 1 1 calc R . .
H33B_16 H 0.2840 0.7041 0.2538 0.130 Uiso 1 1 calc R . .
H33C_16 H 0.2394 0.7066 0.2427 0.130 Uiso 1 1 calc R . .
C34_16 C 0.2818(3) 0.7891(3) 0.2326(2) 0.080(3) Uani 1 1 d . H .
H34A_16 H 0.2853 0.8054 0.2558 0.120 Uiso 1 1 calc R . .
H34B_16 H 0.2495 0.7733 0.2220 0.120 Uiso 1 1 calc R . .
H34C_16 H 0.3000 0.8099 0.2205 0.120 Uiso 1 1 calc R . .
C35_16 C 0.2937(3) 0.7285(3) 0.1964(2) 0.083(3) Uani 1 1 d . H .
H35A_16 H 0.3108 0.7490 0.1836 0.124 Uiso 1 1 calc R . .
H35B_16 H 0.2613 0.7111 0.1858 0.124 Uiso 1 1 calc R . .
H35C_16 H 0.3058 0.7085 0.1969 0.124 Uiso 1 1 calc R . .
B1_16 B 0.3863(3) 0.6892(3) 0.2392(2) 0.038(2) Uiso 1 1 d . . .
Zr1_17 Zr 0.62487(2) 0.58219(2) 0.378922(17) 0.03286(17) Uani 1 1 d . . .
Si1_17 Si 0.79187(7) 0.67590(6) 0.41065(5) 0.0342(5) Uani 1 1 d . . .
Si2_17 Si 0.70176(9) 0.76138(8) 0.43044(7) 0.0606(7) Uani 1 1 d . . .
O1_17 O 0.67007(16) 0.64546(14) 0.40668(12) 0.0447(13) Uani 1 1 d . I .
O2_17 O 0.75136(16) 0.68167(16) 0.42732(12) 0.0468(13) Uani 1 1 d . I .
O3_17 O 0.71408(17) 0.72394(15) 0.43455(13) 0.0556(15) Uani 1 1 d . I .
O4_17 O 0.84262(15) 0.71804(14) 0.42977(12) 0.0405(12) Uani 1 1 d . . .
O5_17 O 0.79155(16) 0.63038(14) 0.41434(12) 0.0410(12) Uani 1 1 d . . .
O6_17 O 0.78029(15) 0.67107(14) 0.37087(11) 0.0389(12) Uani 1 1 d . . .
O7A_17 O 0.6979(4) 0.7899(4) 0.4613(3) 0.064(3) Uiso 0.50 1 d P I 1
O7B_17 O 0.7263(5) 0.7944(4) 0.4746(3) 0.078(4) Uiso 0.50 1 d P I 2
O8_17 O 0.7340(2) 0.7906(2) 0.40853(16) 0.0772(18) Uani 1 1 d . I .
O9A_17 O 0.6443(3) 0.7291(3) 0.4049(2) 0.035(2) Uiso 0.50 1 d P I 1
O9B_17 O 0.6543(5) 0.7519(5) 0.4249(4) 0.096(5) Uiso 0.50 1 d P I 2
C1_17 C 0.6708(3) 0.5450(3) 0.3881(3) 0.066(3) Uani 1 1 d . . .
H1F_17 H 0.6983 0.5548 0.3795 0.080 Uiso 1 1 calc R . .
C2_17 C 0.6660(3) 0.5632(3) 0.4201(3) 0.064(3) Uani 1 1 d . . .
H2F_17 H 0.6901 0.5871 0.4371 0.076 Uiso 1 1 calc R . .
C3_17 C 0.6202(3) 0.5405(3) 0.4230(2) 0.052(2) Uani 1 1 d . . .
H3F_17 H 0.6077 0.5465 0.4421 0.062 Uiso 1 1 calc R . .
C4_17 C 0.5957(3) 0.5073(2) 0.3930(2) 0.047(2) Uani 1 1 d . . .
H4F_17 H 0.5637 0.4869 0.3881 0.057 Uiso 1 1 calc R . .
C5_17 C 0.6272(4) 0.5096(3) 0.3711(2) 0.057(2) Uani 1 1 d . . .
H5F_17 H 0.6203 0.4909 0.3491 0.068 Uiso 1 1 calc R . .
C6_17 C 0.6366(3) 0.5650(3) 0.31841(19) 0.057(2) Uani 1 1 d . . .
H6F_17 H 0.6542 0.5509 0.3131 0.069 Uiso 1 1 calc R . .
C7_17 C 0.6540(3) 0.6116(3) 0.3295(2) 0.057(2) Uani 1 1 d . . .
H7F_17 H 0.6852 0.6341 0.3331 0.068 Uiso 1 1 calc R . .
C8_17 C 0.6164(3) 0.6184(3) 0.3340(2) 0.064(3) Uani 1 1 d . . .
H8F_17 H 0.6183 0.6465 0.3411 0.077 Uiso 1 1 calc R . .
C9_17 C 0.5748(3) 0.5762(3) 0.3262(2) 0.063(2) Uani 1 1 d . . .
H9F_17 H 0.5448 0.5715 0.3272 0.075 Uiso 1 1 calc R . .
C10_17 C 0.5875(3) 0.5425(3) 0.31660(19) 0.055(2) Uani 1 1 d . . .
H10F_17 H 0.5673 0.5114 0.3102 0.066 Uiso 1 1 calc R . .
C11_17 C 0.5580(2) 0.5749(2) 0.3974(2) 0.054(2) Uani 1 1 d . . .
H11S_17 H 0.5603 0.5754 0.4209 0.080 Uiso 1 1 calc R . .
H11T_17 H 0.5317 0.5468 0.3840 0.080 Uiso 1 1 calc R . .
H11U_17 H 0.5538 0.5996 0.3949 0.080 Uiso 1 1 calc R . .
C12_17 C 0.8616(3) 0.7668(2) 0.4424(2) 0.048(2) Uani 1 1 d . . .
C13_17 C 0.9139(3) 0.7869(3) 0.4455(2) 0.073(3) Uani 1 1 d . . .
H13S_17 H 0.9214 0.7799 0.4234 0.110 Uiso 1 1 calc R . .
H13T_17 H 0.9246 0.7744 0.4602 0.110 Uiso 1 1 calc R . .
H13U_17 H 0.9290 0.8192 0.4550 0.110 Uiso 1 1 calc R . .
C14_17 C 0.8476(3) 0.7767(3) 0.4765(2) 0.077(3) Uani 1 1 d . . .
H14V_17 H 0.8142 0.7634 0.4734 0.116 Uiso 1 1 calc R . .
H14W_17 H 0.8620 0.8089 0.4863 0.116 Uiso 1 1 calc R . .
H14X_17 H 0.8576 0.7641 0.4914 0.116 Uiso 1 1 calc R . .
C15_17 C 0.8431(3) 0.7828(2) 0.4174(2) 0.060(2) Uani 1 1 d . . .
H15V_17 H 0.8099 0.7696 0.4159 0.090 Uiso 1 1 calc R . .
H15W_17 H 0.8499 0.7737 0.3954 0.090 Uiso 1 1 calc R . .
H15X_17 H 0.8576 0.8152 0.4250 0.090 Uiso 1 1 calc R . .
C16_17 C 0.8127(3) 0.6223(2) 0.4415(2) 0.046(2) Uani 1 1 d . . .
C17_17 C 0.8648(3) 0.6417(2) 0.44125(19) 0.052(2) Uani 1 1 d . . .
H17V_17 H 0.8796 0.6740 0.4457 0.078 Uiso 1 1 calc R . .
H17W_17 H 0.8692 0.6287 0.4194 0.078 Uiso 1 1 calc R . .
H17X_17 H 0.8784 0.6346 0.4586 0.078 Uiso 1 1 calc R . .
C18_17 C 0.8050(3) 0.6428(3) 0.4760(2) 0.067(3) Uani 1 1 d . . .
H18V_17 H 0.8196 0.6751 0.4803 0.101 Uiso 1 1 calc R . .
H18W_17 H 0.8185 0.6358 0.4935 0.101 Uiso 1 1 calc R . .
H18X_17 H 0.7721 0.6304 0.4758 0.101 Uiso 1 1 calc R . .
C19_17 C 0.7895(3) 0.5710(2) 0.4345(2) 0.073(3) Uani 1 1 d . . .
H19V_17 H 0.7944 0.5581 0.4128 0.110 Uiso 1 1 calc R . .
H19W_17 H 0.7566 0.5586 0.4343 0.110 Uiso 1 1 calc R . .
H19X_17 H 0.8030 0.5640 0.4520 0.110 Uiso 1 1 calc R . .
C20_17 C 0.8016(2) 0.6598(2) 0.34194(18) 0.0401(19) Uani 1 1 d . . .
C21_17 C 0.8536(2) 0.6795(2) 0.3534(2) 0.057(2) Uani 1 1 d . . .
H21Y_17 H 0.8684 0.7119 0.3618 0.086 Uiso 1 1 calc R . .
H21Z_17 H 0.8668 0.6715 0.3345 0.086 Uiso 1 1 calc R . .
H22Y_17 H 0.8585 0.6675 0.3712 0.086 Uiso 1 1 calc R . .
C22_17 C 0.7922(3) 0.6809(2) 0.31641(19) 0.058(2) Uani 1 1 d . . .
H22Z_17 H 0.7591 0.6677 0.3097 0.087 Uiso 1 1 calc R . .
H23Y_17 H 0.8055 0.6753 0.2968 0.087 Uiso 1 1 calc R . .
H23Z_17 H 0.8060 0.7129 0.3265 0.087 Uiso 1 1 calc R . .
C23_17 C 0.7773(3) 0.6088(2) 0.32851(19) 0.053(2) Uani 1 1 d . . .
H24A_17 H 0.7445 0.5971 0.3213 0.080 Uiso 1 1 calc R . .
H24B_17 H 0.7818 0.5965 0.3462 0.080 Uiso 1 1 calc R . .
H24C_17 H 0.7902 0.6005 0.3095 0.080 Uiso 1 1 calc R . .
C24_17 C 0.7384(4) 0.8352(4) 0.4899(3) 0.093(4) Uani 1 1 d . . .
C25A_17 C 0.7761(8) 0.8320(8) 0.4948(6) 0.115(8) Uiso 0.50 1 d P I .
H25S_17 H 0.7690 0.8066 0.5034 0.173 Uiso 0.50 1 calc PR . .
H25T_17 H 0.8000 0.8592 0.5110 0.173 Uiso 0.50 1 calc PR . .
H25U_17 H 0.7869 0.8279 0.4736 0.173 Uiso 0.50 1 calc PR . .
C25B_17 C 0.7931(7) 0.8657(7) 0.4842(5) 0.098(7) Uiso 0.50 1 d P I .
H25V_17 H 0.8107 0.8906 0.5043 0.147 Uiso 0.50 1 calc PR . .
H25W_17 H 0.7928 0.8771 0.4650 0.147 Uiso 0.50 1 calc PR . .
H25X_17 H 0.8072 0.8469 0.4801 0.147 Uiso 0.50 1 calc PR . .
C26_17 C 0.7241(5) 0.8637(3) 0.4804(4) 0.172(7) Uani 1 1 d . I .
H26S_17 H 0.6917 0.8526 0.4817 0.259 Uiso 1 1 calc R . .
H26T_17 H 0.7284 0.8642 0.4574 0.259 Uiso 1 1 calc R . .
H26U_17 H 0.7425 0.8938 0.4955 0.259 Uiso 1 1 calc R . .
C27_17 C 0.7235(8) 0.8339(7) 0.5242(4) 0.296(13) Uani 1 1 d . I .
H27S_17 H 0.6904 0.8139 0.5208 0.444 Uiso 1 1 calc R . .
H27T_17 H 0.7310 0.8638 0.5370 0.444 Uiso 1 1 calc R . .
H27U_17 H 0.7397 0.8233 0.5365 0.444 Uiso 1 1 calc R . .
C28_17 C 0.7312(3) 0.7938(3) 0.3752(2) 0.062(2) Uani 1 1 d . . .
C29_17 C 0.7160(6) 0.7468(5) 0.3535(3) 0.245(11) Uani 1 1 d . I .
H29D_17 H 0.6855 0.7261 0.3566 0.368 Uiso 1 1 calc R . .
H29E_17 H 0.7378 0.7377 0.3599 0.368 Uiso 1 1 calc R . .
H29F_17 H 0.7152 0.7464 0.3299 0.368 Uiso 1 1 calc R . .
C30_17 C 0.7781(3) 0.8243(3) 0.3696(3) 0.108(4) Uani 1 1 d . I .
H30S_17 H 0.7887 0.8547 0.3832 0.162 Uiso 1 1 calc R . .
H30T_17 H 0.7768 0.8234 0.3460 0.162 Uiso 1 1 calc R . .
H30U_17 H 0.7994 0.8146 0.3759 0.162 Uiso 1 1 calc R . .
C31_17 C 0.6983(4) 0.8080(6) 0.3679(5) 0.236(11) Uani 1 1 d . I .
H31S_17 H 0.7091 0.8381 0.3823 0.355 Uiso 1 1 calc R . .
H31T_17 H 0.6684 0.7877 0.3722 0.355 Uiso 1 1 calc R . .
H31U_17 H 0.6954 0.8078 0.3444 0.355 Uiso 1 1 calc R . .
C32_17 C 0.6039(4) 0.7219(4) 0.4217(5) 0.127(6) Uani 1 1 d . . .
C33_17 C 0.5688(4) 0.6891(4) 0.3897(4) 0.163(8) Uani 1 1 d . I .
H33S_17 H 0.5712 0.7047 0.3727 0.244 Uiso 1 1 calc R . .
H33T_17 H 0.5378 0.6771 0.3948 0.244 Uiso 1 1 calc R . .
H33U_17 H 0.5750 0.6648 0.3812 0.244 Uiso 1 1 calc R . .
C34_17 C 0.5964(4) 0.7624(4) 0.4348(4) 0.216(10) Uani 1 1 d . I .
H34S_17 H 0.5972 0.7762 0.4169 0.324 Uiso 1 1 calc R . .
H34T_17 H 0.6207 0.7841 0.4538 0.324 Uiso 1 1 calc R . .
H34U_17 H 0.5666 0.7522 0.4418 0.324 Uiso 1 1 calc R . .
C35_17 C 0.6028(5) 0.7001(4) 0.4505(4) 0.194(9) Uani 1 1 d . I .
H35S_17 H 0.6076 0.6747 0.4425 0.291 Uiso 1 1 calc R . .
H35T_17 H 0.5730 0.6899 0.4576 0.291 Uiso 1 1 calc R . .
H35U_17 H 0.6270 0.7219 0.4695 0.291 Uiso 1 1 calc R . .
B1_17 B 0.7105(3) 0.6828(3) 0.4217(2) 0.034(2) Uiso 1 1 d . . .
Zr1_18 Zr 0.75109(3) 0.39537(2) 0.587647(19) 0.0439(2) Uani 1 1 d . . .
Si1_18 Si 0.58386(7) 0.33709(7) 0.54080(6) 0.0471(6) Uani 1 1 d . . .
Si2_18 Si 0.67462(7) 0.38095(6) 0.45713(5) 0.0358(5) Uani 1 1 d . . .
O1_18 O 0.7057(2) 0.3820(2) 0.54947(14) 0.098(2) Uani 1 1 d . J .
O2_18 O 0.62627(19) 0.34723(18) 0.52507(18) 0.113(3) Uani 1 1 d . J .
O3_18 O 0.68486(19) 0.38140(18) 0.49522(13) 0.0649(16) Uani 1 1 d . J .
O4A_18 O 0.5333(3) 0.3075(3) 0.5200(2) 0.026(2) Uiso 0.50 1 d P J 1
O5A_18 O 0.5945(3) 0.3016(3) 0.5612(2) 0.023(2) Uiso 0.50 1 d P J 1
O6A_18 O 0.5867(3) 0.3745(3) 0.5735(2) 0.032(2) Uiso 0.50 1 d P J 1
O4B_18 O 0.5491(3) 0.3253(3) 0.5025(3) 0.053(3) Uiso 0.50 1 d P J 2
O5B_18 O 0.5560(4) 0.3073(4) 0.5584(3) 0.065(3) Uiso 0.50 1 d P J 2
O6B_18 O 0.5982(3) 0.3935(3) 0.5562(3) 0.050(3) Uiso 0.50 1 d P J 2
O7_18 O 0.6575(2) 0.3295(2) 0.43621(16) 0.103(3) Uani 1 1 d . . .
O8_18 O 0.6347(2) 0.3913(2) 0.44914(19) 0.104(3) Uani 1 1 d . . .
O9_18 O 0.72079(17) 0.41545(16) 0.44649(13) 0.0512(14) Uani 1 1 d . . .
C1A_18 C 0.7168(3) 0.3167(3) 0.5956(3) 0.078(3) Uani 1 1 d . . .
C1B_18 C 0.7415(8) 0.3471(7) 0.6268(6) 0.088(6) Uiso 0.50 1 d P . .
C2A_18 C 0.6987(5) 0.3052(5) 0.5625(4) 0.047(4) Uiso 0.50 1 d P . .
C3A_18 C 0.7368(5) 0.3194(5) 0.5434(4) 0.049(4) Uiso 0.50 1 d P . .
C3B_18 C 0.7501(7) 0.3213(6) 0.5720(6) 0.068(5) Uiso 0.50 1 d P . .
C4A_18 C 0.7790(7) 0.3373(6) 0.5672(5) 0.052(4) Uiso 0.50 1 d P . .
C4B_18 C 0.7940(6) 0.3509(6) 0.5921(5) 0.055(5) Uiso 0.50 1 d P . .
C5A_18 C 0.7663(7) 0.3344(6) 0.5984(5) 0.055(5) Uiso 0.50 1 d P . .
C5B_18 C 0.7903(7) 0.3666(6) 0.6252(5) 0.080(6) Uiso 0.50 1 d P . .
C6A_18 C 0.7867(6) 0.4362(6) 0.6478(5) 0.068(5) Uiso 0.50 1 d P . .
C6B_18 C 0.7740(6) 0.4581(6) 0.6451(4) 0.051(4) Uiso 0.50 1 d P . .
C7A_18 C 0.7379(7) 0.4094(6) 0.6474(5) 0.075(6) Uiso 0.50 1 d P . .
C8A_18 C 0.7190(4) 0.4299(3) 0.6325(3) 0.086(3) Uani 1 1 d . . .
C8B_18 C 0.7140(6) 0.4439(6) 0.6068(5) 0.059(5) Uiso 0.50 1 d P . .
C9A_18 C 0.7498(8) 0.4631(6) 0.6199(5) 0.065(5) Uiso 0.50 1 d P . .
C9B_18 C 0.7554(6) 0.4743(5) 0.5991(4) 0.052(4) Uiso 0.50 1 d P . .
C10A_18 C 0.7944(4) 0.4768(4) 0.6264(3) 0.112(5) Uani 1 1 d . . .
C11_18 C 0.8166(3) 0.4326(3) 0.5661(2) 0.073(3) Uani 1 1 d . . .
H12B_18 H 0.8317 0.4644 0.5774 0.109 Uiso 1 1 calc R . .
H12C_18 H 0.8081 0.4275 0.5421 0.109 Uiso 1 1 calc R . .
H12D_18 H 0.8376 0.4215 0.5696 0.109 Uiso 1 1 calc R . .
C12_18 C 0.5193(4) 0.2789(3) 0.4818(3) 0.088(4) Uani 1 1 d . . .
C13_18 C 0.4712(4) 0.2518(4) 0.4849(3) 0.136(5) Uani 1 1 d . J .
H16K_18 H 0.4537 0.2300 0.4634 0.204 Uiso 1 1 calc R . .
H16L_18 H 0.4581 0.2711 0.4917 0.204 Uiso 1 1 calc R . .
H16M_18 H 0.4699 0.2364 0.5019 0.204 Uiso 1 1 calc R . .
C14_18 C 0.5450(4) 0.2518(4) 0.4768(3) 0.150(6) Uani 1 1 d . J .
H16N_18 H 0.5369 0.2339 0.4534 0.225 Uiso 1 1 calc R . .
H16O_18 H 0.5362 0.2322 0.4913 0.225 Uiso 1 1 calc R . .
H16P_18 H 0.5781 0.2723 0.4825 0.225 Uiso 1 1 calc R . .
C15_18 C 0.5204(4) 0.2977(4) 0.4512(4) 0.131(5) Uani 1 1 d . J .
H16Q_18 H 0.5103 0.2738 0.4304 0.196 Uiso 1 1 calc R . .
H16R_18 H 0.5517 0.3210 0.4519 0.196 Uiso 1 1 calc R . .
H16S_18 H 0.5000 0.3103 0.4522 0.196 Uiso 1 1 calc R . .
C16_18 C 0.5723(3) 0.2846(3) 0.5859(2) 0.061(2) Uani 1 1 d . . .
C17_18 C 0.5232(3) 0.2680(3) 0.5904(3) 0.118(5) Uani 1 1 d . J .
H17S_18 H 0.5164 0.2506 0.6064 0.176 Uiso 1 1 calc R . .
H17T_18 H 0.5028 0.2493 0.5688 0.176 Uiso 1 1 calc R . .
H17U_18 H 0.5186 0.2934 0.5987 0.176 Uiso 1 1 calc R . .
C18_18 C 0.5769(4) 0.2436(4) 0.5734(3) 0.160(7) Uani 1 1 d . J .
H18V_18 H 0.5863 0.2361 0.5925 0.240 Uiso 1 1 calc R . .
H18W_18 H 0.5999 0.2495 0.5590 0.240 Uiso 1 1 calc R . .
H18X_18 H 0.5473 0.2187 0.5607 0.240 Uiso 1 1 calc R . .
C19_18 C 0.6051(3) 0.3190(4) 0.6176(3) 0.132(5) Uani 1 1 d . J .
H19Y_18 H 0.6129 0.3041 0.6318 0.198 Uiso 1 1 calc R . .
H19Z_18 H 0.5906 0.3346 0.6296 0.198 Uiso 1 1 calc R . .
H19A_18 H 0.6331 0.3403 0.6116 0.198 Uiso 1 1 calc R . .
C20_18 C 0.5775(3) 0.4153(3) 0.5715(2) 0.060(2) Uani 1 1 d . . .
C21_18 C 0.5398(5) 0.4040(4) 0.5424(3) 0.163(7) Uani 1 1 d . J .
H28K_18 H 0.5369 0.4303 0.5434 0.244 Uiso 1 1 calc R . .
H28L_18 H 0.5106 0.3798 0.5444 0.244 Uiso 1 1 calc R . .
H28M_18 H 0.5482 0.3949 0.5211 0.244 Uiso 1 1 calc R . .
C22_18 C 0.6179(5) 0.4603(5) 0.5785(5) 0.267(11) Uani 1 1 d . J .
H28N_18 H 0.6079 0.4814 0.5765 0.401 Uiso 1 1 calc R . .
H28O_18 H 0.6380 0.4599 0.5624 0.401 Uiso 1 1 calc R . .
H28P_18 H 0.6347 0.4692 0.6011 0.401 Uiso 1 1 calc R . .
C23_18 C 0.5586(5) 0.4127(4) 0.6010(3) 0.160(6) Uani 1 1 d . J .
H28Q_18 H 0.5490 0.4350 0.6067 0.240 Uiso 1 1 calc R . .
H28R_18 H 0.5817 0.4182 0.6193 0.240 Uiso 1 1 calc R . .
H28S_18 H 0.5321 0.3831 0.5973 0.240 Uiso 1 1 calc R . .
C24_18 C 0.6487(4) 0.3045(3) 0.4018(2) 0.068(3) Uani 1 1 d . . .
C25_18 C 0.5953(4) 0.2730(4) 0.3911(3) 0.142(5) Uani 1 1 d . . .
H28T_18 H 0.5806 0.2909 0.3905 0.213 Uiso 1 1 calc R . .
H28U_18 H 0.5838 0.2561 0.4072 0.213 Uiso 1 1 calc R . .
H28V_18 H 0.5883 0.2526 0.3689 0.213 Uiso 1 1 calc R . .
C26_18 C 0.6681(5) 0.3332(3) 0.3787(2) 0.134(5) Uani 1 1 d . . .
H28W_18 H 0.7012 0.3522 0.3861 0.200 Uiso 1 1 calc R . .
H28X_18 H 0.6539 0.3517 0.3790 0.200 Uiso 1 1 calc R . .
H28Y_18 H 0.6616 0.3142 0.3559 0.200 Uiso 1 1 calc R . .
C27_18 C 0.6707(5) 0.2757(5) 0.4025(4) 0.185(7) Uani 1 1 d . . .
H28Z_18 H 0.7040 0.2946 0.4091 0.278 Uiso 1 1 calc R . .
H28B_18 H 0.6634 0.2551 0.3802 0.278 Uiso 1 1 calc R . .
H28C_18 H 0.6589 0.2587 0.4186 0.278 Uiso 1 1 calc R . .
C28_18 C 0.6317(3) 0.4311(3) 0.4486(2) 0.052(2) Uani 1 1 d . . .
C29_18 C 0.6584(4) 0.4677(4) 0.4812(3) 0.170(7) Uani 1 1 d . . .
H29D_18 H 0.6450 0.4576 0.5000 0.255 Uiso 1 1 calc R . .
H29E_18 H 0.6570 0.4943 0.4805 0.255 Uiso 1 1 calc R . .
H29F_18 H 0.6904 0.4747 0.4841 0.255 Uiso 1 1 calc R . .
C30_18 C 0.6514(3) 0.4454(3) 0.4185(2) 0.085(3) Uani 1 1 d . . .
H32C_18 H 0.6842 0.4552 0.4220 0.127 Uiso 1 1 calc R . .
H32D_18 H 0.6470 0.4699 0.4159 0.127 Uiso 1 1 calc R . .
H32E_18 H 0.6357 0.4203 0.3983 0.127 Uiso 1 1 calc R . .
C31_18 C 0.5805(3) 0.4155(3) 0.4445(2) 0.085(3) Uani 1 1 d . . .
H32F_18 H 0.5691 0.4066 0.4642 0.127 Uiso 1 1 calc R . .
H32G_18 H 0.5642 0.3901 0.4245 0.127 Uiso 1 1 calc R . .
H32H_18 H 0.5755 0.4397 0.4421 0.127 Uiso 1 1 calc R . .
C32_18 C 0.7697(3) 0.4382(2) 0.4592(2) 0.053(2) Uani 1 1 d . . .
C33_18 C 0.7814(3) 0.4752(3) 0.4922(2) 0.079(3) Uani 1 1 d . . .
H36D_18 H 0.7730 0.4966 0.4877 0.118 Uiso 1 1 calc R . .
H36E_18 H 0.8143 0.4905 0.5010 0.118 Uiso 1 1 calc R . .
H36F_18 H 0.7644 0.4619 0.5086 0.118 Uiso 1 1 calc R . .
C34_18 C 0.7938(3) 0.4572(3) 0.4315(2) 0.082(3) Uani 1 1 d . . .
H36G_18 H 0.7850 0.4783 0.4270 0.123 Uiso 1 1 calc R . .
H36H_18 H 0.7848 0.4329 0.4110 0.123 Uiso 1 1 calc R . .
H36I_18 H 0.8271 0.4724 0.4388 0.123 Uiso 1 1 calc R . .
C35_18 C 0.7833(3) 0.4039(3) 0.4668(3) 0.087(3) Uani 1 1 d . . .
H36J_18 H 0.7760 0.3805 0.4462 0.131 Uiso 1 1 calc R . .
H36K_18 H 0.7662 0.3907 0.4833 0.131 Uiso 1 1 calc R . .
H36L_18 H 0.8162 0.4193 0.4756 0.131 Uiso 1 1 calc R . .
B1_18 B 0.6725(3) 0.3702(3) 0.5238(3) 0.049(2) Uiso 1 1 d . . .
 
loop_
  _atom_site_aniso_label
  _atom_site_aniso_U_11
  _atom_site_aniso_U_22
  _atom_site_aniso_U_33
  _atom_site_aniso_U_23
  _atom_site_aniso_U_13
  _atom_site_aniso_U_12
Zr1_1 0.0330(4) 0.0210(3) 0.0322(4) 0.0033(3) 0.0058(3) 0.0153(3)
Si1_1 0.0310(12) 0.0255(10) 0.0382(12) 0.0057(9) 0.0077(10) 0.0158(10)
Si2_1 0.0391(12) 0.0223(10) 0.0404(12) 0.0050(9) 0.0073(10) 0.0200(10)
O1_1 0.037(3) 0.020(2) 0.054(3) -0.006(2) -0.001(2) 0.016(2)
O2_1 0.030(3) 0.039(3) 0.056(3) -0.011(3) 0.002(2) 0.019(2)
O3_1 0.039(3) 0.021(2) 0.057(3) 0.004(2) 0.014(2) 0.020(2)
O4_1 0.038(3) 0.033(3) 0.064(4) -0.006(3) 0.006(3) 0.019(3)
O5_1 0.049(4) 0.096(5) 0.041(3) -0.004(3) 0.013(3) 0.020(3)
O6_1 0.053(4) 0.055(4) 0.158(7) 0.051(4) -0.016(4) 0.022(3)
O7_1 0.046(3) 0.034(3) 0.040(3) 0.008(2) 0.010(2) 0.022(2)
O8_1 0.049(3) 0.025(3) 0.041(3) 0.003(2) 0.004(2) 0.024(2)
O9_1 0.037(3) 0.034(3) 0.051(3) 0.015(2) 0.017(2) 0.024(2)
C1_1 0.062(6) 0.051(5) 0.039(5) 0.014(4) 0.018(4) 0.033(5)
C2_1 0.061(6) 0.040(5) 0.055(6) 0.021(4) 0.028(5) 0.020(5)
C3_1 0.079(7) 0.044(5) 0.045(5) 0.024(4) 0.015(5) 0.035(5)
C4_1 0.044(5) 0.059(5) 0.045(5) 0.017(4) 0.004(4) 0.034(5)
C5_1 0.053(6) 0.033(4) 0.034(5) 0.000(4) 0.005(4) 0.017(4)
C6_1 0.114(9) 0.049(6) 0.046(6) 0.020(5) 0.025(6) 0.058(6)
C7_1 0.078(8) 0.088(8) 0.118(10) 0.072(7) 0.051(7) 0.069(7)
C8_1 0.073(7) 0.031(5) 0.080(8) 0.011(5) -0.028(6) 0.020(5)
C9_1 0.107(8) 0.071(7) 0.045(6) 0.020(5) 0.029(6) 0.069(7)
C10_1 0.045(5) 0.037(5) 0.080(7) 0.027(5) 0.003(5) 0.015(4)
C11_1 0.042(5) 0.040(4) 0.052(5) 0.004(4) 0.014(4) 0.023(4)
C12_1 0.037(5) 0.031(4) 0.054(5) 0.005(4) 0.004(4) 0.013(4)
C13_1 0.035(5) 0.044(5) 0.095(7) 0.005(5) 0.000(5) 0.007(4)
C14_1 0.071(6) 0.069(6) 0.109(8) 0.051(6) 0.035(6) 0.047(5)
C15_1 0.073(6) 0.069(6) 0.051(6) -0.003(5) 0.003(5) 0.041(5)
C16_1 0.049(5) 0.046(5) 0.030(4) 0.015(4) 0.014(4) 0.030(4)
C17_1 0.056(6) 0.079(6) 0.048(5) 0.021(5) 0.023(4) 0.038(5)
C18_1 0.079(8) 0.119(9) 0.159(12) 0.094(9) 0.038(8) 0.045(7)
C19_1 0.065(7) 0.060(6) 0.113(9) -0.022(6) 0.015(6) 0.026(6)
C20_1 0.052(5) 0.050(5) 0.053(5) 0.033(4) -0.001(4) 0.026(4)
C21_1 0.058(6) 0.064(6) 0.074(7) 0.022(5) 0.003(5) 0.034(5)
C22_1 0.069(8) 0.242(16) 0.052(7) 0.028(9) 0.020(6) 0.032(9)
C23_1 0.070(7) 0.055(7) 0.242(15) 0.026(8) -0.006(8) 0.036(6)
C24_1 0.059(6) 0.057(6) 0.049(6) 0.019(5) 0.011(5) 0.029(5)
C25_1 0.082(7) 0.103(7) 0.056(6) 0.039(6) 0.033(5) 0.054(6)
C26_1 0.127(9) 0.144(10) 0.079(8) 0.064(7) 0.032(7) 0.100(8)
C27_1 0.082(8) 0.098(8) 0.056(6) 0.009(6) 0.006(6) 0.005(7)
C28_1 0.047(5) 0.027(4) 0.048(5) -0.007(4) -0.004(4) 0.019(4)
C29_1 0.062(6) 0.048(5) 0.088(7) -0.015(5) -0.024(5) 0.027(5)
C30_1 0.093(8) 0.071(7) 0.079(7) -0.014(6) 0.021(6) 0.049(6)
C31_1 0.113(8) 0.028(5) 0.073(7) 0.003(5) 0.004(6) 0.030(5)
C32_1 0.042(5) 0.038(4) 0.063(6) 0.019(4) 0.015(4) 0.024(4)
C33_1 0.039(5) 0.071(6) 0.074(7) 0.016(5) 0.002(5) 0.014(5)
C34_1 0.058(6) 0.077(7) 0.138(9) 0.041(6) 0.039(6) 0.054(6)
C35_1 0.055(6) 0.071(6) 0.071(6) 0.031(5) 0.026(5) 0.038(5)
Zr1_2 0.0426(5) 0.0241(4) 0.0427(5) 0.0013(3) 0.0038(4) 0.0169(4)
Si1_2 0.0465(14) 0.0300(11) 0.0539(15) 0.0142(10) 0.0048(11) 0.0246(11)
Si2_2 0.0470(14) 0.0261(11) 0.0421(13) 0.0085(10) 0.0002(11) 0.0221(10)
O1_2 0.056(3) 0.032(3) 0.052(3) 0.001(3) -0.010(3) 0.027(3)
O2_2 0.062(3) 0.032(3) 0.046(3) 0.010(2) 0.002(3) 0.032(3)
O3_2 0.058(3) 0.023(3) 0.035(3) -0.001(2) -0.004(2) 0.024(2)
O4_2 0.058(4) 0.039(3) 0.054(3) 0.015(3) 0.020(3) 0.030(3)
O5_2 0.069(4) 0.039(3) 0.063(4) 0.012(3) 0.006(3) 0.037(3)
O6_2 0.044(3) 0.042(3) 0.056(4) 0.002(3) -0.006(3) 0.021(3)
O7_2 0.045(3) 0.025(3) 0.056(3) 0.001(2) -0.003(3) 0.021(3)
O8_2 0.064(4) 0.054(3) 0.046(3) 0.023(3) 0.013(3) 0.045(3)
O9_2 0.051(3) 0.038(3) 0.044(3) 0.010(2) 0.011(3) 0.026(3)
C1_2 0.063(6) 0.058(6) 0.095(8) 0.030(6) 0.038(6) 0.042(6)
C2_2 0.039(5) 0.061(6) 0.081(7) 0.016(6) 0.016(5) 0.019(5)
C3_2 0.060(7) 0.052(6) 0.116(9) 0.040(6) 0.040(6) 0.030(6)
C4_2 0.068(7) 0.107(9) 0.061(7) 0.037(6) 0.023(6) 0.047(7)
C5_2 0.067(7) 0.052(6) 0.058(6) 0.003(5) 0.026(5) 0.022(5)
C6_2 0.059(6) 0.028(5) 0.071(7) 0.004(4) 0.010(5) 0.009(5)
C7_2 0.072(7) 0.034(5) 0.070(6) 0.016(5) 0.016(6) 0.023(5)
C8_2 0.101(9) 0.058(6) 0.055(6) 0.024(5) 0.028(6) 0.031(6)
C9_2 0.086(8) 0.046(6) 0.111(9) 0.017(6) 0.061(7) 0.029(6)
C10_2 0.045(6) 0.058(6) 0.099(8) 0.010(6) 0.008(5) 0.015(5)
C11_2 0.055(6) 0.048(5) 0.069(6) 0.001(5) -0.015(5) 0.024(5)
C12_2 0.089(8) 0.073(7) 0.077(7) 0.044(6) 0.043(6) 0.051(6)
C13_2 0.085(9) 0.090(8) 0.150(12) 0.050(8) 0.057(8) 0.032(7)
C14_2 0.200(13) 0.161(11) 0.095(9) 0.089(8) 0.064(9) 0.145(10)
C15_2 0.166(11) 0.158(11) 0.099(9) 0.076(8) 0.090(8) 0.132(10)
C16_2 0.081(7) 0.034(5) 0.082(7) 0.008(5) 0.005(6) 0.035(5)
C17_2 0.171(12) 0.103(8) 0.123(10) 0.052(8) 0.080(9) 0.106(9)
C18_2 0.161(11) 0.102(8) 0.104(9) 0.035(7) 0.015(8) 0.111(8)
C19_2 0.120(10) 0.039(6) 0.175(12) -0.010(7) -0.027(9) 0.052(7)
C20_2 0.053(6) 0.064(6) 0.087(8) 0.024(6) -0.001(6) 0.030(5)
C24_2 0.068(6) 0.023(4) 0.056(6) -0.006(4) -0.023(5) 0.026(4)
C25_2 0.082(7) 0.045(5) 0.070(7) -0.002(5) -0.017(5) 0.028(5)
C26_2 0.094(7) 0.023(4) 0.118(9) -0.007(5) -0.026(6) 0.031(5)
C27_2 0.050(6) 0.053(5) 0.091(7) 0.004(5) 0.001(5) 0.025(5)
C28_2 0.058(6) 0.059(5) 0.057(6) 0.023(5) 0.011(5) 0.038(5)
C29_2 0.086(7) 0.107(8) 0.094(8) 0.057(7) 0.036(6) 0.070(7)
C30_2 0.095(7) 0.063(6) 0.085(7) 0.035(5) 0.018(6) 0.059(6)
C31_2 0.093(7) 0.071(6) 0.054(6) 0.016(5) -0.001(5) 0.056(6)
C32_2 0.057(6) 0.050(5) 0.049(5) 0.017(4) 0.008(5) 0.033(5)
C33_2 0.060(6) 0.058(6) 0.077(7) 0.018(5) 0.008(5) 0.026(5)
C34_2 0.083(7) 0.059(6) 0.117(9) 0.011(6) 0.040(6) 0.046(6)
C35_2 0.068(7) 0.095(7) 0.068(7) 0.027(6) 0.006(5) 0.037(6)
Zr1_3 0.0351(4) 0.0321(4) 0.0487(5) 0.0109(4) 0.0062(4) 0.0199(4)
Si1_3 0.0342(12) 0.0336(11) 0.0338(12) 0.0079(9) 0.0083(10) 0.0197(10)
Si2_3 0.0558(15) 0.0354(12) 0.0376(13) 0.0143(10) 0.0191(11) 0.0267(11)
O1_3 0.038(3) 0.083(4) 0.038(3) 0.017(3) 0.006(3) 0.009(3)
O2_3 0.037(3) 0.042(3) 0.033(3) 0.008(2) 0.008(2) 0.019(2)
O3_3 0.051(3) 0.062(3) 0.044(3) 0.027(3) 0.017(3) 0.020(3)
O4_3 0.039(3) 0.050(3) 0.052(3) 0.008(3) 0.002(3) 0.024(3)
O5_3 0.042(3) 0.060(3) 0.052(3) 0.028(3) 0.009(3) 0.022(3)
O6_3 0.061(4) 0.053(3) 0.058(4) 0.001(3) 0.016(3) 0.033(3)
O7_3 0.088(5) 0.046(3) 0.066(4) -0.001(3) 0.032(3) 0.016(3)
O8_3 0.099(5) 0.089(4) 0.076(4) 0.049(4) 0.043(4) 0.071(4)
O9_3 0.071(4) 0.046(3) 0.046(3) 0.018(3) 0.021(3) 0.018(3)
C1_3 0.090(16) 0.129(17) 0.43(4) 0.20(2) 0.086(19) 0.081(14)
C2_3 0.102(14) 0.039(7) 0.35(3) 0.049(14) 0.075(18) 0.050(9)
C3_3 0.090(11) 0.043(8) 0.41(3) -0.011(12) 0.106(17) 0.034(8)
C4_3 0.090(13) 0.068(10) 0.39(4) 0.034(18) 0.03(2) 0.071(11)
C5_3 0.14(2) 0.153(18) 0.38(4) 0.15(3) 0.00(2) 0.093(16)
C6_3 0.111(13) 0.137(12) 0.040(7) 0.007(8) 0.012(7) -0.002(10)
C7_3 0.088(9) 0.057(7) 0.099(10) -0.036(7) 0.043(8) 0.022(7)
C8_3 0.117(10) 0.041(6) 0.124(10) -0.006(7) 0.035(9) 0.045(7)
C9_3 0.070(9) 0.068(8) 0.094(10) -0.047(7) 0.005(8) -0.002(7)
C10_3 0.090(12) 0.186(15) 0.052(8) 0.015(9) -0.023(7) -0.005(11)
C11_3 0.044(5) 0.079(6) 0.078(7) 0.025(5) 0.011(5) 0.028(5)
C12_3 0.053(6) 0.050(5) 0.052(6) 0.008(5) -0.003(5) 0.022(5)
C13_3 0.155(11) 0.083(8) 0.098(9) -0.019(7) -0.021(8) 0.084(8)
C14_3 0.093(8) 0.097(8) 0.067(7) 0.021(6) -0.006(6) 0.035(7)
C15_3 0.058(7) 0.098(8) 0.124(10) -0.004(7) -0.020(7) 0.013(6)
C16_3 0.041(5) 0.059(5) 0.046(5) 0.036(4) 0.019(4) 0.015(4)
C17_3 0.045(6) 0.107(8) 0.069(7) 0.049(6) 0.017(5) 0.020(6)
C18_3 0.092(8) 0.068(7) 0.085(8) 0.028(6) -0.007(6) 0.026(6)
C19_3 0.045(5) 0.082(6) 0.053(6) 0.021(5) 0.007(4) 0.024(5)
C20_3 0.080(7) 0.040(5) 0.065(6) 0.005(5) 0.017(5) 0.035(5)
C21_3 0.104(10) 0.077(8) 0.203(14) -0.050(9) -0.014(9) 0.057(8)
C22_3 0.290(18) 0.100(9) 0.138(12) 0.061(9) 0.107(12) 0.135(11)
C23_3 0.096(9) 0.120(10) 0.187(13) 0.053(9) 0.069(9) 0.080(8)
C24_3 0.082(7) 0.039(5) 0.048(5) 0.001(4) 0.014(5) 0.032(5)
C25_3 0.101(8) 0.057(6) 0.069(7) -0.005(5) 0.017(6) 0.019(6)
C26_3 0.113(9) 0.073(7) 0.061(6) 0.005(5) 0.040(6) 0.042(6)
C27_3 0.128(10) 0.101(9) 0.183(13) 0.066(9) 0.071(9) 0.085(8)
C28_3 0.085(7) 0.055(5) 0.046(5) 0.019(4) 0.017(5) 0.050(5)
C29_3 0.252(15) 0.075(8) 0.088(9) 0.012(7) 0.047(9) 0.100(9)
C30_3 0.186(12) 0.106(8) 0.055(7) 0.048(6) 0.045(7) 0.088(8)
C31_3 0.127(11) 0.133(10) 0.071(8) 0.050(7) 0.018(7) 0.071(9)
C32_3 0.061(6) 0.050(5) 0.059(6) 0.024(5) 0.029(5) 0.029(5)
C33_3 0.103(9) 0.140(10) 0.103(9) 0.077(8) 0.057(7) 0.076(8)
C34_3 0.063(6) 0.076(7) 0.100(8) 0.044(6) 0.035(6) 0.029(5)
C35_3 0.095(8) 0.054(6) 0.082(7) -0.008(6) 0.022(6) 0.012(6)
Zr1_4 0.0516(5) 0.0258(4) 0.0379(4) 0.0082(3) 0.0137(4) 0.0227(4)
Si1_4 0.0505(14) 0.0362(12) 0.0347(12) 0.0070(10) 0.0108(11) 0.0290(11)
Si2_4 0.0661(16) 0.0284(11) 0.0408(13) 0.0108(10) 0.0082(11) 0.0307(12)
O1_4 0.046(3) 0.029(3) 0.038(3) 0.007(2) 0.004(2) 0.021(2)
O2_4 0.047(3) 0.034(3) 0.039(3) 0.000(2) 0.007(2) 0.027(3)
O3_4 0.082(4) 0.041(3) 0.040(3) 0.004(2) -0.003(3) 0.046(3)
O4_4 0.056(4) 0.050(3) 0.038(3) 0.007(3) 0.008(3) 0.033(3)
O5_4 0.066(4) 0.049(3) 0.046(3) 0.021(3) 0.023(3) 0.044(3)
O6_4 0.058(3) 0.035(3) 0.034(3) 0.007(2) 0.015(3) 0.029(3)
O7_4 0.074(4) 0.043(3) 0.034(3) 0.003(2) 0.003(3) 0.043(3)
O8_4 0.075(4) 0.059(4) 0.104(5) 0.046(4) 0.021(4) 0.037(3)
O9_4 0.092(5) 0.040(3) 0.048(3) 0.003(3) -0.010(3) 0.044(3)
C1_4 0.41(3) 0.185(17) 0.099(12) 0.120(13) 0.169(18) 0.26(2)
C2_4 0.094(9) 0.200(14) 0.037(6) 0.056(9) 0.030(6) 0.092(11)
C3_4 0.150(12) 0.058(6) 0.054(7) 0.017(5) 0.039(8) 0.064(8)
C4_4 0.087(10) 0.26(2) 0.060(8) 0.058(11) 0.044(8) 0.116(12)
C5_4 0.189(18) 0.048(8) 0.092(11) -0.010(8) 0.085(12) -0.041(9)
C6_4 0.077(8) 0.019(4) 0.081(7) -0.006(5) 0.022(6) 0.015(5)
C7_4 0.090(7) 0.026(4) 0.075(7) 0.007(5) 0.030(6) 0.039(5)
C8_4 0.083(7) 0.040(5) 0.069(7) 0.012(5) 0.037(6) 0.042(5)
C9_4 0.107(8) 0.047(5) 0.033(5) 0.005(4) 0.025(5) 0.044(6)
C10_4 0.078(7) 0.049(5) 0.041(5) -0.013(5) -0.009(5) 0.027(6)
C11_4 0.059(6) 0.036(5) 0.075(6) 0.012(4) 0.006(5) 0.021(4)
C12_4 0.051(6) 0.044(5) 0.056(6) 0.002(4) 0.002(5) 0.021(4)
C13_4 0.056(6) 0.066(6) 0.099(8) 0.003(6) -0.016(5) 0.031(5)
C14_4 0.085(7) 0.058(6) 0.049(6) -0.007(5) 0.008(5) 0.035(5)
C15_4 0.072(6) 0.043(5) 0.076(7) 0.010(5) 0.008(5) 0.025(5)
C16_4 0.095(8) 0.071(6) 0.052(6) 0.025(5) 0.019(5) 0.066(6)
C17_4 0.102(8) 0.076(7) 0.077(7) 0.020(6) 0.002(6) 0.067(6)
C18_4 0.154(10) 0.120(9) 0.083(8) 0.069(7) 0.057(7) 0.112(8)
C19_4 0.120(9) 0.053(6) 0.076(7) 0.007(5) 0.007(6) 0.060(6)
C20\_4 0.053(5) 0.047(5) 0.042(5) 0.012(4) 0.017(4) 0.032(4)
C21_4 0.082(7) 0.068(6) 0.060(6) 0.025(5) 0.030(5) 0.047(5)
C22_4 0.100(7) 0.070(6) 0.052(6) 0.034(5) 0.036(5) 0.058(6)
C23_4 0.105(8) 0.074(6) 0.044(6) 0.003(5) 0.024(5) 0.044(6)
C24_4 0.080(7) 0.045(5) 0.036(5) -0.004(4) 0.005(4) 0.044(5)
C25_4 0.067(6) 0.055(5) 0.068(6) -0.002(5) -0.013(5) 0.035(5)
C26_4 0.110(8) 0.058(5) 0.051(6) -0.001(4) 0.010(5) 0.067(6)
C27_4 0.132(9) 0.082(7) 0.061(6) 0.025(6) 0.031(6) 0.078(7)
C28_4 0.096(9) 0.064(7) 0.162(12) 0.080(8) 0.046(8) 0.049(7)
C29_4 0.211(15) 0.113(10) 0.139(12) 0.074(10) 0.103(11) 0.112(11)
C30_4 0.160(11) 0.049(6) 0.152(11) 0.046(7) 0.052(9) 0.058(7)
C31_4 0.120(13) 0.154(13) 0.41(3) 0.212(17) 0.059(15) 0.042(11)
C32_4 0.087(7) 0.041(5) 0.059(6) 0.000(5) -0.006(5) 0.049(5)
C33_4 0.129(9) 0.076(7) 0.054(6) -0.003(5) -0.029(6) 0.055(7)
C34_4 0.097(8) 0.076(7) 0.121(9) 0.015(6) -0.015(7) 0.067(6)
C35_4 0.113(9) 0.075(7) 0.088(8) 0.024(6) 0.028(7) 0.063(7)
Zr1_5 0.0431(5) 0.0354(4) 0.0306(4) 0.0074(3) 0.0037(3) 0.0219(4)
Si1_5 0.0369(12) 0.0295(11) 0.0393(12) 0.0140(9) 0.0130(10) 0.0203(10)
Si2_5 0.0435(13) 0.0327(11) 0.0328(12) 0.0131(9) 0.0140(10) 0.0248(10)
O1_5 0.034(3) 0.042(3) 0.031(3) 0.009(2) 0.000(2) 0.010(2)
O2_5 0.033(3) 0.030(2) 0.029(3) 0.011(2) 0.006(2) 0.017(2)
O3_5 0.035(3) 0.040(3) 0.040(3) 0.015(2) 0.013(2) 0.023(2)
O4_5 0.043(3) 0.040(3) 0.058(3) 0.028(3) 0.026(3) 0.028(3)
O5_5 0.063(4) 0.041(3) 0.043(3) 0.013(2) 0.020(3) 0.036(3)
O6_5 0.044(3) 0.042(3) 0.054(3) 0.016(3) 0.013(3) 0.027(3)
O7_5 0.058(3) 0.035(3) 0.041(3) 0.004(2) 0.008(3) 0.031(3)
O8_5 0.056(3) 0.032(3) 0.027(3) 0.011(2) 0.013(2) 0.030(3)
O9_5 0.059(4) 0.038(3) 0.039(3) 0.016(2) 0.023(3) 0.030(3)
C1_5 0.079(8) 0.050(6) 0.122(10) 0.046(6) 0.044(7) 0.049(6)
C2_5 0.064(7) 0.032(5) 0.092(8) 0.003(5) 0.010(6) 0.030(5)
C3_5 0.046(6) 0.049(5) 0.082(7) -0.008(5) 0.024(6) 0.022(5)
C4_5 0.049(6) 0.068(7) 0.105(9) -0.001(6) 0.024(6) 0.036(6)
C5_5 0.096(9) 0.082(7) 0.118(10) 0.034(7) 0.015(7) 0.074(7)
C6_5 0.163(14) 0.113(10) 0.035(6) 0.006(6) 0.016(7) 0.091(11)
C7_5 0.104(9) 0.068(8) 0.077(8) -0.012(6) 0.037(7) 0.049(8)
C8_5 0.105(10) 0.063(8) 0.083(8) -0.023(6) -0.011(8) 0.048(8)
C9_5 0.101(11) 0.074(9) 0.087(10) -0.044(7) -0.022(8) 0.029(8)
C10_5 0.126(13) 0.167(15) 0.047(7) -0.043(9) -0.040(8) 0.095(13)
C11_5 0.056(6) 0.081(7) 0.083(7) 0.038(6) -0.006(5) 0.024(5)
C12_5 0.041(5) 0.043(5) 0.069(6) 0.013(5) 0.002(5) 0.022(4)
C13_5 0.041(6) 0.099(8) 0.112(9) 0.022(7) 0.002(6) 0.015(6)
C14_5 0.091(8) 0.046(5) 0.098(8) -0.002(5) 0.002(6) 0.036(6)
C15_5 0.076(7) 0.089(7) 0.065(6) 0.020(6) 0.006(5) 0.055(6)
C16_5 0.048(5) 0.050(5) 0.070(6) 0.038(5) 0.027(5) 0.031(4)
C17_5 0.070(7) 0.104(8) 0.104(8) 0.079(7) 0.054(6) 0.050(6)
C18_5 0.086(7) 0.053(5) 0.083(7) 0.042(5) 0.031(6) 0.037(5)
C19_5 0.079(7) 0.076(6) 0.059(6) 0.040(5) 0.032(5) 0.047(6)
C20_5 0.057(6) 0.039(5) 0.058(6) 0.006(4) 0.020(4) 0.034(4)
C21_5 0.159(13) 0.165(13) 0.288(19) 0.100(13) 0.119(13) 0.146(12)
C22_5 0.44(2) 0.147(11) 0.082(9) 0.064(8) 0.086(12) 0.240(15)
C23_5 0.191(14) 0.069(8) 0.184(14) -0.021(9) -0.050(11) 0.093(9)
C24_5 0.068(6) 0.029(4) 0.051(5) 0.007(4) 0.018(4) 0.033(4)
C25_5 0.078(6) 0.041(5) 0.048(5) 0.009(4) 0.008(5) 0.033(5)
C26_5 0.108(8) 0.048(5) 0.062(6) 0.008(5) 0.035(6) 0.039(5)
C27_5 0.074(6) 0.041(5) 0.087(7) 0.016(5) 0.015(5) 0.042(5)
C28_5 0.067(6) 0.051(5) 0.033(4) 0.015(4) 0.013(4) 0.047(5)
C29_5 0.308(17) 0.151(10) 0.049(6) 0.022(7) 0.021(8) 0.202(12)
C30_5 0.190(14) 0.34(2) 0.267(18) 0.279(17) 0.168(14) 0.216(15)
C31_5 0.141(11) 0.080(8) 0.247(16) -0.029(9) -0.127(11) 0.079(8)
C32_5 0.042(5) 0.042(5) 0.059(5) 0.017(4) 0.022(4) 0.024(4)
C33_5 0.068(6) 0.084(7) 0.072(6) 0.043(5) 0.024(5) 0.050(5)
C34_5 0.053(6) 0.089(7) 0.096(7) 0.067(6) 0.038(5) 0.038(5)
C35_5 0.049(6) 0.046(5) 0.083(7) 0.008(5) 0.015(5) 0.015(4)
Zr1_6 0.0448(5) 0.0361(4) 0.0419(5) 0.0098(4) 0.0094(4) 0.0233(4)
Si1_6 0.0476(14) 0.0343(12) 0.0575(15) 0.0199(11) 0.0059(12) 0.0249(11)
Si2_6 0.0542(15) 0.0380(12) 0.0491(14) 0.0100(11) 0.0133(12) 0.0347(12)
O1_6 0.060(4) 0.033(3) 0.054(3) 0.007(3) -0.007(3) 0.024(3)
O2_6 0.051(3) 0.037(3) 0.059(3) 0.011(3) 0.003(3) 0.029(3)
O3_6 0.074(4) 0.053(3) 0.055(4) 0.020(3) 0.020(3) 0.049(3)
O4_6 0.055(3) 0.029(3) 0.059(4) 0.012(3) 0.009(3) 0.026(3)
O5_6 0.056(4) 0.033(3) 0.085(4) 0.019(3) 0.007(3) 0.030(3)
O6_6 0.060(4) 0.057(3) 0.056(4) 0.024(3) 0.004(3) 0.031(3)
O7_6 0.078(4) 0.060(3) 0.067(4) 0.037(3) 0.030(3) 0.050(3)
O8_6 0.070(4) 0.046(3) 0.060(4) -0.003(3) 0.008(3) 0.037(3)
O9_6 0.059(4) 0.066(4) 0.072(4) 0.026(3) 0.020(3) 0.037(3)
C1_6 0.145(12) 0.054(7) 0.104(10) 0.039(7) 0.049(9) 0.069(8)
C2_6 0.069(7) 0.057(6) 0.055(6) 0.030(5) 0.008(5) 0.010(5)
C3_6 0.085(9) 0.077(8) 0.119(11) 0.039(8) 0.062(8) 0.044(8)
C4_6 0.051(8) 0.120(13) 0.165(16) 0.092(12) 0.007(9) 0.003(8)
C5_6 0.169(16) 0.043(7) 0.057(8) 0.018(6) 0.014(9) 0.009(8)
C6_6 0.094(9) 0.130(11) 0.062(8) 0.002(8) 0.025(7) 0.068(9)
C7_6 0.085(8) 0.094(8) 0.063(7) 0.009(6) 0.029(6) 0.065(7)
C8_6 0.051(6) 0.096(8) 0.084(8) 0.039(7) 0.031(5) 0.042(6)
C9_6 0.086(9) 0.099(9) 0.136(12) 0.073(9) 0.071(8) 0.051(8)
C10_6 0.113(11) 0.182(14) 0.058(8) 0.070(9) 0.056(8) 0.095(11)
C11_6 0.080(7) 0.064(6) 0.058(6) -0.005(5) -0.005(5) 0.045(5)
C12_6 0.042(5) 0.047(5) 0.072(6) 0.029(5) 0.014(5) 0.021(4)
C13_6 0.055(6) 0.061(6) 0.078(7) 0.014(5) 0.025(5) 0.017(5)
C14_6 0.099(8) 0.068(6) 0.060(7) 0.029(5) 0.011(6) 0.012(6)
C15_6 0.074(7) 0.058(6) 0.254(15) 0.077(8) 0.045(8) 0.045(6)
C16_6 0.079(7) 0.052(6) 0.097(8) 0.034(5) 0.018(6) 0.049(5)
C17_6 0.267(18) 0.253(18) 0.133(12) -0.010(12) -0.058(12) 0.236(17)
C18_6 0.172(12) 0.123(10) 0.136(11) 0.053(9) 0.054(10) 0.126(10)
C20_6 0.065(6) 0.055(6) 0.048(6) 0.020(5) 0.009(5) 0.027(5)
C21_6 0.111(9) 0.120(9) 0.062(7) 0.035(7) 0.001(6) 0.057(8)
C22_6 0.104(8) 0.064(6) 0.069(7) 0.019(5) 0.021(6) 0.044(6)
C23_6 0.091(7) 0.076(7) 0.072(7) 0.044(6) 0.026(6) 0.044(6)
C24_6 0.090(7) 0.062(6) 0.061(6) 0.038(5) 0.035(6) 0.052(6)
C25_6 0.127(10) 0.144(10) 0.136(10) 0.100(9) 0.074(8) 0.101(9)
C26_6 0.116(8) 0.069(6) 0.084(7) 0.032(5) 0.030(6) 0.073(6)
C27_6 0.183(12) 0.101(8) 0.076(8) 0.025(7) 0.021(8) 0.103(9)
C28_6 0.066(6) 0.051(5) 0.060(6) -0.012(5) -0.003(5) 0.039(5)
C29_6 0.136(10) 0.084(7) 0.104(9) 0.020(7) -0.009(7) 0.074(8)
C30_6 0.116(8) 0.077(7) 0.073(7) -0.005(5) 0.007(6) 0.079(7)
C31_6 0.065(7) 0.075(7) 0.103(8) -0.002(6) 0.014(6) 0.038(6)
C32_6 0.048(6) 0.066(6) 0.069(6) 0.012(5) 0.016(5) 0.031(5)
C33_6 0.066(7) 0.098(8) 0.090(8) 0.002(7) 0.011(6) 0.032(6)
C34_6 0.086(8) 0.086(7) 0.157(11) 0.014(7) 0.034(7) 0.067(7)
C35_6 0.083(8) 0.103(8) 0.078(8) 0.026(7) 0.032(6) 0.041(7)
Zr1_7 0.0490(5) 0.0330(4) 0.0382(4) 0.0058(3) 0.0052(4) 0.0222(4)
Si1_7 0.0477(14) 0.0380(12) 0.0489(14) 0.0132(11) 0.0186(11) 0.0244(12)
Si2_7 0.0459(14) 0.0289(11) 0.0436(13) 0.0029(10) 0.0041(11) 0.0270(11)
O1_7 0.049(3) 0.050(3) 0.044(3) 0.020(3) 0.015(3) 0.024(3)
O2_7 0.054(3) 0.032(3) 0.050(3) 0.005(2) 0.014(3) 0.023(3)
O3_7 0.076(4) 0.058(4) 0.150(6) 0.034(4) 0.049(4) 0.059(4)
O4_7 0.045(3) 0.043(3) 0.059(4) 0.011(3) 0.013(3) 0.019(3)
O5_7 0.051(3) 0.048(3) 0.048(3) 0.015(3) 0.019(3) 0.032(3)
O6_7 0.049(3) 0.043(3) 0.044(3) 0.012(3) 0.016(3) 0.026(3)
O7_7 0.078(4) 0.056(4) 0.056(4) 0.005(3) -0.002(3) 0.024(3)
O8_7 0.043(3) 0.068(4) 0.062(4) 0.023(3) 0.012(3) 0.038(3)
O9_7 0.042(3) 0.056(3) 0.053(3) 0.007(3) 0.007(3) 0.028(3)
C1_7 0.075(7) 0.059(6) 0.061(6) 0.035(5) 0.024(5) 0.042(5)
C2_7 0.069(6) 0.057(6) 0.036(5) 0.013(4) 0.002(4) 0.024(5)
C3_7 0.072(6) 0.041(5) 0.054(6) 0.013(4) 0.020(5) 0.032(5)
C4_7 0.052(6) 0.081(7) 0.055(6) 0.015(5) 0.023(5) 0.031(6)
C5_7 0.072(7) 0.035(5) 0.056(6) 0.013(4) 0.019(5) 0.015(5)
C6_7 0.068(8) 0.040(6) 0.102(9) -0.043(6) -0.006(7) 0.020(6)
C7_7 0.083(7) 0.032(5) 0.061(6) -0.002(5) 0.008(6) 0.032(5)
C8_7 0.082(7) 0.063(6) 0.046(6) 0.004(5) 0.018(5) 0.054(6)
C9_7 0.144(11) 0.088(8) 0.033(6) 0.006(5) 0.015(6) 0.085(8)
C10_7 0.117(11) 0.118(10) 0.060(8) -0.044(7) -0.045(7) 0.087(10)
C11_7 0.051(6) 0.051(5) 0.065(6) 0.006(5) -0.005(5) 0.020(5)
C12_7 0.056(6) 0.034(5) 0.058(6) 0.007(4) 0.008(5) 0.013(4)
C13_7 0.043(6) 0.072(7) 0.108(9) 0.006(6) 0.010(6) 0.006(5)
C14_7 0.072(6) 0.054(5) 0.049(5) 0.005(4) 0.002(5) 0.036(5)
C15_7 0.106(8) 0.044(5) 0.078(7) 0.009(5) 0.000(6) 0.029(6)
C16_7 0.049(5) 0.048(5) 0.045(5) 0.014(4) 0.007(4) 0.026(4)
C17_7 0.058(6) 0.070(6) 0.061(6) 0.010(5) 0.004(5) 0.040(5)
C18_7 0.121(9) 0.115(8) 0.072(7) 0.052(6) 0.048(6) 0.091(7)
C19_7 0.055(6) 0.045(5) 0.087(7) 0.020(5) 0.016(5) 0.025(5)
C20_7 0.064(6) 0.069(6) 0.047(5) 0.031(5) 0.031(5) 0.047(5)
C21_7 0.064(6) 0.069(6) 0.073(6) 0.040(5) 0.034(5) 0.045(5)
C22_7 0.106(8) 0.112(8) 0.090(8) 0.069(7) 0.054(6) 0.084(7)
C23_7 0.086(7) 0.102(8) 0.044(6) 0.017(6) 0.028(5) 0.049(6)
C24_7 0.078(7) 0.056(5) 0.034(5) 0.003(4) 0.008(5) 0.047(5)
C25_7 0.086(8) 0.085(7) 0.094(8) 0.013(6) -0.015(6) 0.043(7)
C26_7 0.153(11) 0.079(7) 0.135(10) 0.025(7) 0.061(8) 0.085(8)
C27_7 0.099(8) 0.064(6) 0.057(6) 0.013(5) 0.001(5) 0.045(6)
C28_7 0.052(5) 0.046(5) 0.058(6) 0.014(4) 0.014(5) 0.035(5)
C29_7 0.065(6) 0.084(7) 0.072(6) 0.027(5) 0.026(5) 0.052(6)
C30_7 0.095(7) 0.079(6) 0.068(6) 0.033(5) 0.034(5) 0.070(6)
C31_7 0.065(6) 0.058(6) 0.081(7) 0.016(5) 0.018(5) 0.032(5)
C32_7 0.033(5) 0.038(5) 0.124(9) 0.008(5) 0.008(5) 0.025(4)
C33_7 0.056(6) 0.055(6) 0.175(11) 0.022(7) 0.034(7) 0.033(5)
C34_7 0.093(9) 0.111(9) 0.106(9) 0.029(8) -0.025(7) 0.061(7)
C35_7 0.064(7) 0.046(6) 0.196(12) 0.014(7) 0.038(7) 0.037(5)
Zr1_8 0.0371(4) 0.0341(4) 0.0379(4) 0.0117(3) 0.0059(3) 0.0239(4)
Si1_8 0.0278(12) 0.0314(11) 0.0395(13) 0.0065(10) 0.0085(10) 0.0153(10)
Si2_8 0.0419(13) 0.0300(11) 0.0356(12) 0.0125(9) 0.0140(10) 0.0241(10)
O1_8 0.053(3) 0.049(3) 0.034(3) 0.009(2) 0.005(2) 0.033(3)
O2_8 0.037(3) 0.031(3) 0.061(3) -0.001(3) 0.015(3) 0.016(2)
O3_8 0.051(3) 0.050(3) 0.047(3) 0.024(3) 0.025(3) 0.035(3)
O4_8 0.051(4) 0.042(3) 0.063(4) -0.001(3) 0.014(3) 0.021(3)
O5_8 0.046(3) 0.036(3) 0.082(4) 0.000(3) 0.019(3) 0.027(3)
O6_8 0.067(4) 0.060(4) 0.063(4) 0.024(3) 0.017(3) 0.031(3)
O7_8 0.053(3) 0.043(3) 0.033(3) 0.016(2) 0.017(2) 0.037(3)
O8_8 0.055(3) 0.039(3) 0.044(3) 0.011(2) 0.013(3) 0.034(3)
O9_8 0.047(3) 0.038(3) 0.040(3) 0.018(2) 0.017(3) 0.028(3)
C1_8 0.097(9) 0.062(7) 0.083(8) 0.017(6) 0.045(7) 0.058(7)
C2_8 0.045(6) 0.057(7) 0.105(10) -0.037(6) -0.011(7) 0.040(6)
C3_8 0.165(12) 0.087(8) 0.064(7) 0.017(7) 0.013(9) 0.112(9)
C4_8 0.076(8) 0.040(6) 0.115(10) 0.008(7) 0.028(8) 0.032(6)
C5_8 0.075(8) 0.071(7) 0.061(7) -0.030(6) -0.020(6) 0.055(7)
C6_8 0.142(12) 0.066(8) 0.073(8) 0.003(6) -0.048(9) 0.060(9)
C7_8 0.107(10) 0.087(8) 0.117(10) 0.071(8) 0.063(8) 0.081(8)
C8_8 0.142(12) 0.046(6) 0.098(10) 0.004(6) -0.037(8) 0.061(8)
C9_8 0.237(19) 0.170(15) 0.105(11) 0.105(11) 0.125(13) 0.192(16)
C10_8 0.059(8) 0.139(14) 0.26(2) 0.140(15) 0.051(12) 0.074(9)
C11_8 0.055(6) 0.069(6) 0.081(7) 0.034(5) 0.021(5) 0.037(5)
C12_8 0.052(6) 0.039(5) 0.050(5) -0.016(4) -0.001(4) 0.027(4)
C13_8 0.061(7) 0.065(6) 0.055(6) -0.022(5) -0.004(5) 0.016(5)
C14_8 0.058(6) 0.078(6) 0.083(7) 0.034(6) 0.019(5) 0.047(5)
C15_8 0.091(7) 0.056(6) 0.065(6) -0.011(5) 0.009(5) 0.054(5)
C16_8 0.056(5) 0.040(4) 0.051(5) 0.016(4) 0.036(4) 0.037(4)
C17_8 0.060(6) 0.077(6) 0.099(8) 0.027(6) 0.034(5) 0.053(6)
C18_8 0.126(9) 0.082(7) 0.140(10) 0.063(7) 0.076(8) 0.073(7)
C19_8 0.124(9) 0.157(10) 0.051(6) -0.007(7) 0.003(6) 0.120(9)
C20_8 0.055(6) 0.081(6) 0.071(6) 0.053(5) 0.033(5) 0.051(5)
C21_8 0.055(6) 0.094(7) 0.069(7) 0.040(6) 0.016(5) 0.028(6)
C22_8 0.131(9) 0.101(8) 0.068(7) 0.011(6) 0.017(6) 0.091(8)
C23_8 0.068(6) 0.071(6) 0.072(7) 0.023(5) 0.017(5) 0.043(5)
C24_8 0.053(5) 0.034(4) 0.035(4) 0.005(4) 0.003(4) 0.031(4)
C25_8 0.059(6) 0.064(6) 0.066(6) 0.014(5) 0.002(5) 0.039(5)
C26_8 0.082(6) 0.055(5) 0.046(5) 0.026(4) 0.010(5) 0.046(5)
C27_8 0.085(7) 0.045(5) 0.066(6) 0.007(4) 0.015(5) 0.043(5)
C28_8 0.077(6) 0.040(5) 0.043(5) 0.005(4) 0.011(5) 0.042(5)
C29_8 0.065(6) 0.049(5) 0.095(7) 0.018(5) 0.017(5) 0.043(5)
C30_8 0.116(8) 0.070(6) 0.056(6) 0.015(5) 0.033(6) 0.062(6)
C31_8 0.080(7) 0.049(5) 0.059(6) 0.001(5) 0.008(5) 0.040(5)
C32_8 0.039(5) 0.047(5) 0.053(5) 0.016(4) 0.022(4) 0.028(4)
C33_8 0.060(6) 0.043(5) 0.065(6) 0.005(4) 0.009(5) 0.021(5)
C34_8 0.054(6) 0.050(5) 0.092(7) 0.038(5) 0.042(5) 0.022(5)
C35_8 0.051(6) 0.064(6) 0.092(7) 0.032(5) 0.028(5) 0.035(5)
Zr1_9 0.0585(5) 0.0336(4) 0.0374(4) 0.0045(4) 0.0103(4) 0.0272(4)
Si1_9 0.0552(16) 0.0566(15) 0.0551(16) 0.0069(13) 0.0014(13) 0.0387(13)
Si2_9 0.0654(16) 0.0384(13) 0.0476(14) -0.0008(11) 0.0016(12) 0.0387(13)
O1_9 0.075(4) 0.052(3) 0.042(3) -0.007(3) -0.005(3) 0.042(3)
O2_9 0.110(5) 0.097(5) 0.071(4) -0.030(4) -0.036(4) 0.088(5)
O3_9 0.083(4) 0.043(3) 0.063(4) -0.007(3) -0.010(3) 0.049(3)
O7_9 0.072(4) 0.061(4) 0.064(4) 0.016(3) 0.007(3) 0.043(3)
O8_9 0.101(5) 0.040(3) 0.049(4) -0.007(3) -0.011(3) 0.044(3)
O9_9 0.068(4) 0.041(3) 0.070(4) 0.011(3) 0.019(3) 0.037(3)
C1_9 0.092(8) 0.049(6) 0.060(6) 0.025(5) 0.024(6) 0.033(6)
C2_9 0.176(13) 0.050(7) 0.050(7) 0.021(6) 0.037(8) 0.028(7)
C3_9 0.187(15) 0.074(8) 0.144(13) 0.052(9) 0.128(12) 0.090(10)
C4_9 0.070(8) 0.089(9) 0.153(12) 0.061(9) 0.052(8) 0.045(7)
C5_9 0.075(7) 0.047(6) 0.081(8) 0.016(5) 0.024(6) 0.026(6)
C6_9 0.068(6) 0.040(5) 0.049(6) 0.003(4) 0.015(5) 0.023(5)
C7_9 0.084(7) 0.067(7) 0.072(7) 0.017(5) 0.034(6) 0.059(6)
C8_9 0.050(6) 0.057(6) 0.053(6) 0.009(5) 0.011(4) 0.029(5)
C9_9 0.057(6) 0.047(5) 0.060(6) 0.022(5) 0.024(5) 0.022(5)
C10_9 0.059(6) 0.060(6) 0.046(5) 0.020(5) 0.014(5) 0.026(5)
C11_9 0.092(7) 0.078(6) 0.053(6) 0.017(5) 0.000(5) 0.059(6)
C12_9 0.073(7) 0.066(7) 0.099(9) 0.019(6) 0.029(6) 0.032(6)
C16_9 0.145(13) 0.130(11) 0.127(12) -0.037(10) -0.048(10) 0.127(11)
C18_9 0.160(14) 0.100(10) 0.241(19) 0.029(12) 0.012(13) 0.107(10)
C19_9 0.133(13) 0.194(16) 0.178(15) 0.060(14) 0.036(11) 0.121(13)
C20_9 0.108(10) 0.118(10) 0.117(10) 0.072(9) 0.039(8) 0.069(9)
C24_9 0.095(8) 0.072(7) 0.062(7) 0.021(6) 0.003(6) 0.042(7)
C25_9 0.071(9) 0.37(2) 0.186(15) 0.215(16) 0.052(9) 0.070(12)
C26_9 0.129(10) 0.102(9) 0.116(10) 0.037(8) 0.012(8) 0.075(8)
C27_9 0.140(11) 0.127(10) 0.067(8) 0.015(8) -0.004(7) 0.066(9)
C28_9 0.103(8) 0.050(6) 0.054(6) -0.013(5) -0.005(6) 0.034(6)
C29_9 0.177(12) 0.087(8) 0.051(7) -0.013(6) -0.038(7) 0.067(8)
C30_9 0.141(10) 0.051(6) 0.071(7) -0.010(5) 0.009(6) 0.060(7)
C31_9 0.129(11) 0.068(7) 0.083(8) -0.023(6) 0.005(8) 0.006(7)
C32_9 0.075(7) 0.067(6) 0.078(7) 0.024(6) 0.029(6) 0.046(6)
C33_9 0.082(7) 0.053(6) 0.115(9) 0.003(6) 0.023(7) 0.031(6)
C34_9 0.107(8) 0.094(8) 0.108(9) 0.026(7) 0.045(7) 0.075(7)
C35_9 0.151(11) 0.105(9) 0.118(10) 0.060(8) 0.063(8) 0.086(8)
Zr1_10 0.0456(5) 0.0272(4) 0.0393(4) 0.0065(3) 0.0105(4) 0.0144(4)
Si1_10 0.0438(13) 0.0293(11) 0.0445(13) 0.0085(10) 0.0112(11) 0.0261(11)
Si2_10 0.0443(13) 0.0255(11) 0.0487(14) 0.0083(10) 0.0124(11) 0.0251(10)
O1_10 0.039(3) 0.029(3) 0.049(3) 0.006(2) 0.009(2) 0.019(2)
O2_10 0.045(3) 0.025(2) 0.044(3) 0.007(2) 0.008(2) 0.027(2)
O3_10 0.057(3) 0.030(3) 0.053(3) 0.002(2) 0.008(3) 0.036(3)
O4_10 0.044(3) 0.043(3) 0.044(3) 0.005(3) 0.006(3) 0.030(3)
O5_10 0.059(3) 0.036(3) 0.050(3) 0.018(2) 0.013(3) 0.033(3)
O6_10 0.053(3) 0.033(3) 0.036(3) 0.010(2) 0.013(2) 0.031(3)
O7_10 0.053(3) 0.032(3) 0.051(3) 0.007(2) 0.009(3) 0.029(3)
O8_10 0.053(3) 0.039(3) 0.056(3) 0.016(3) 0.017(3) 0.031(3)
O9_10 0.051(3) 0.035(3) 0.055(3) 0.012(3) 0.012(3) 0.032(3)
C1_10 0.247(17) 0.089(9) 0.092(10) 0.073(8) 0.091(11) 0.112(12)
C2_10 0.082(8) 0.155(12) 0.063(7) 0.060(8) 0.029(6) 0.080(9)
C3_10 0.081(9) 0.100(8) 0.047(6) 0.011(6) 0.023(6) 0.041(8)
C4_10 0.081(9) 0.120(11) 0.066(7) 0.030(7) 0.036(7) 0.052(8)
C5_10 0.083(8) 0.058(7) 0.070(7) 0.017(6) 0.028(6) 0.008(6)
C6_10 0.094(10) 0.025(5) 0.119(10) -0.015(6) 0.019(8) 0.015(6)
C7_10 0.094(9) 0.037(6) 0.114(9) 0.014(6) 0.033(8) 0.039(6)
C8_10 0.098(8) 0.040(6) 0.075(7) 0.006(5) 0.038(7) 0.035(6)
C9_10 0.146(11) 0.053(6) 0.040(6) -0.001(5) 0.034(7) 0.055(8)
C10_10 0.116(11) 0.057(7) 0.071(8) -0.023(6) -0.007(7) 0.038(8)
C11_10 0.068(6) 0.060(6) 0.065(6) 0.013(5) 0.009(5) 0.031(5)
C12_10 0.041(5) 0.036(4) 0.049(5) -0.002(4) 0.005(4) 0.014(4)
C13_10 0.054(6) 0.052(5) 0.082(7) 0.005(5) -0.003(5) 0.027(5)
C14_10 0.081(7) 0.086(7) 0.047(6) 0.008(5) 0.020(5) 0.041(6)
C15_10 0.067(6) 0.032(5) 0.089(7) 0.008(5) -0.012(5) 0.023(5)
C16_10 0.122(9) 0.052(5) 0.068(7) 0.029(5) 0.031(6) 0.064(6)
C20_10 0.067(6) 0.054(5) 0.043(5) 0.016(4) 0.021(4) 0.044(5)
C21_10 0.058(6) 0.053(5) 0.066(6) 0.015(5) 0.025(5) 0.029(5)
C22_10 0.100(8) 0.135(9) 0.086(7) 0.083(7) 0.051(6) 0.086(7)
C23_10 0.056(6) 0.112(8) 0.055(6) -0.005(6) 0.019(5) 0.033(6)
C24_10 0.075(6) 0.048(5) 0.048(5) 0.006(4) 0.017(5) 0.042(5)
C25_10 0.065(6) 0.051(5) 0.066(6) -0.006(5) -0.010(5) 0.024(5)
C26_10 0.100(7) 0.049(5) 0.060(6) 0.015(4) 0.027(5) 0.053(5)
C27_10 0.087(7) 0.059(5) 0.046(5) 0.016(4) 0.019(5) 0.048(5)
C28_10 0.058(6) 0.035(5) 0.084(7) 0.025(5) 0.027(5) 0.029(4)
C29_10 0.067(7) 0.065(6) 0.141(10) 0.063(7) 0.040(7) 0.031(6)
C30_10 0.095(7) 0.053(5) 0.108(8) 0.042(5) 0.040(6) 0.055(5)
C31_10 0.119(9) 0.072(7) 0.073(7) 0.031(6) 0.047(6) 0.056(6)
C32_10 0.061(6) 0.044(5) 0.047(5) 0.007(4) 0.005(4) 0.040(5)
C33_10 0.057(6) 0.060(6) 0.073(6) 0.019(5) 0.020(5) 0.031(5)
C34_10 0.072(7) 0.080(7) 0.093(7) 0.006(6) -0.012(5) 0.062(6)
C35_10 0.079(7) 0.090(7) 0.054(6) 0.013(5) 0.003(5) 0.059(6)
Zr1_11 0.0412(4) 0.0370(4) 0.0270(4) 0.0032(3) 0.0036(3) 0.0269(4)
Si1_11 0.0370(13) 0.0276(11) 0.0428(13) 0.0105(10) 0.0094(10) 0.0201(10)
Si2_11 0.0395(12) 0.0267(11) 0.0318(12) 0.0098(9) 0.0051(10) 0.0181(10)
O1_11 0.041(3) 0.050(3) 0.036(3) 0.016(2) 0.007(2) 0.027(3)
O2_11 0.044(3) 0.037(3) 0.039(3) 0.018(2) 0.012(2) 0.023(3)
O3_11 0.039(3) 0.082(4) 0.042(3) 0.042(3) -0.003(3) -0.001(3)
O4_11 0.042(3) 0.032(3) 0.050(3) 0.003(2) 0.010(3) 0.021(3)
O5_11 0.051(3) 0.042(3) 0.058(3) 0.032(3) 0.026(3) 0.033(3)
O6_11 0.055(3) 0.029(3) 0.051(3) 0.006(2) 0.009(3) 0.029(3)
O9_11 0.047(4) 0.100(5) 0.050(4) 0.045(4) -0.003(3) -0.005(4)
C1_11 0.116(9) 0.056(6) 0.064(7) 0.021(5) 0.036(6) 0.070(7)
C2_11 0.056(6) 0.035(5) 0.059(6) 0.007(4) 0.013(5) 0.030(4)
C3_11 0.071(6) 0.053(5) 0.034(5) -0.006(4) 0.015(5) 0.044(5)
C4_11 0.047(6) 0.058(6) 0.091(8) -0.006(6) 0.015(6) 0.035(5)
C5_11 0.111(10) 0.095(8) 0.069(8) -0.001(6) 0.000(7) 0.093(8)
C6_11 0.074(7) 0.059(6) 0.033(5) -0.001(4) -0.004(5) 0.048(5)
C7_11 0.081(7) 0.042(5) 0.034(5) 0.000(4) 0.013(5) 0.040(5)
C8_11 0.080(7) 0.088(7) 0.035(5) 0.020(5) 0.025(5) 0.067(6)
C9_11 0.104(8) 0.044(5) 0.043(5) 0.008(4) 0.019(5) 0.055(6)
C10_11 0.068(6) 0.044(5) 0.043(5) -0.009(4) 0.005(5) 0.023(5)
C11_11 0.046(5) 0.055(5) 0.051(5) 0.012(4) 0.008(4) 0.018(4)
C12_11 0.049(6) 0.042(5) 0.049(6) -0.015(4) 0.006(4) 0.011(5)
C13_11 0.057(7) 0.106(9) 0.094(8) -0.040(7) 0.013(6) -0.011(7)
C14_11 0.122(9) 0.069(6) 0.069(7) -0.014(5) 0.023(6) 0.059(7)
C15_11 0.076(7) 0.103(8) 0.062(7) 0.009(6) -0.010(5) 0.049(6)
C16_11 0.086(7) 0.073(6) 0.070(7) 0.047(5) 0.049(6) 0.057(6)
C17_11 0.051(7) 0.192(13) 0.154(12) 0.133(11) 0.012(7) 0.004(8)
C19_11 0.24(2) 0.32(2) 0.071(10) 0.090(14) 0.042(12) -0.094(17)
C20_11 0.045(5) 0.025(4) 0.070(6) 0.003(4) 0.006(5) 0.019(4)
C21_11 0.091(7) 0.053(5) 0.093(8) 0.021(5) 0.004(6) 0.052(5)
C22_11 0.071(7) 0.031(5) 0.121(8) 0.021(5) 0.025(6) 0.035(5)
C23_11 0.081(7) 0.052(6) 0.099(8) -0.005(5) 0.019(6) 0.043(5)
C24_11 0.053(5) 0.038(5) 0.029(4) -0.005(4) 0.003(4) 0.016(4)
C25_11 0.075(8) 0.158(11) 0.063(7) 0.036(8) 0.017(6) 0.012(8)
C26_11 0.081(8) 0.105(8) 0.054(6) 0.011(6) 0.030(6) 0.007(6)
C27_11 0.094(9) 0.113(10) 0.44(3) 0.164(14) 0.046(13) 0.067(8)
C28_11 0.083(7) 0.050(5) 0.046(5) 0.021(4) 0.016(5) 0.051(5)
C29_11 0.076(8) 0.184(12) 0.118(10) 0.111(10) -0.019(7) 0.015(8)
C30_11 0.128(9) 0.080(7) 0.051(6) 0.037(5) 0.013(6) 0.051(6)
C31_11 0.190(14) 0.081(8) 0.148(12) -0.005(8) 0.093(10) 0.051(9)
C32_11 0.044(5) 0.023(4) 0.041(5) 0.008(3) 0.007(4) 0.015(4)
C33_11 0.120(9) 0.126(9) 0.080(7) 0.058(7) 0.047(6) 0.101(8)
C34_11 0.052(5) 0.042(5) 0.063(6) 0.020(4) 0.013(4) 0.018(4)
C35_11 0.126(9) 0.047(6) 0.074(7) 0.004(5) 0.023(6) 0.041(6)
Zr1_12 0.0448(5) 0.0485(5) 0.0299(4) 0.0049(4) 0.0048(3) 0.0309(4)
Si1_12 0.0458(14) 0.0334(12) 0.0443(13) 0.0100(10) 0.0154(11) 0.0240(11)
Si2_12 0.0460(13) 0.0299(11) 0.0302(12) 0.0070(9) 0.0048(10) 0.0223(10)
O1_12 0.037(3) 0.042(3) 0.032(3) 0.007(2) 0.006(2) 0.022(2)
O2_12 0.041(3) 0.036(3) 0.036(3) 0.008(2) 0.006(2) 0.020(2)
O3_12 0.038(3) 0.036(3) 0.034(3) 0.008(2) 0.004(2) 0.019(2)
O4_12 0.040(3) 0.044(3) 0.064(4) 0.002(3) 0.010(3) 0.019(3)
O5_12 0.063(4) 0.051(3) 0.063(4) 0.027(3) 0.034(3) 0.039(3)
O6_12 0.063(4) 0.037(3) 0.051(3) 0.007(3) 0.020(3) 0.032(3)
O7_12 0.061(4) 0.039(3) 0.034(3) 0.000(2) 0.001(3) 0.030(3)
O8_12 0.071(4) 0.058(3) 0.039(3) 0.011(3) 0.007(3) 0.052(3)
O9_12 0.057(4) 0.034(3) 0.035(3) 0.008(2) 0.005(3) 0.021(3)
C1_12 0.158(12) 0.081(8) 0.091(9) 0.037(7) 0.045(9) 0.105(9)
C2_12 0.084(7) 0.051(6) 0.090(8) 0.011(6) 0.017(7) 0.056(6)
C3_12 0.085(8) 0.077(7) 0.051(6) -0.001(5) 0.021(6) 0.059(6)
C4_12 0.080(8) 0.102(8) 0.083(8) -0.024(7) 0.001(7) 0.073(7)
C5_12 0.121(11) 0.133(11) 0.063(8) 0.000(7) -0.010(8) 0.111(10)
C6_12 0.078(7) 0.092(7) 0.033(5) 0.002(5) -0.002(5) 0.065(6)
C7_12 0.077(7) 0.061(6) 0.034(5) 0.009(4) 0.016(5) 0.043(6)
C8_12 0.047(5) 0.065(6) 0.026(4) -0.008(4) 0.009(4) 0.029(5)
C9_12 0.061(6) 0.048(5) 0.047(5) -0.003(4) 0.006(5) 0.034(5)
C10_12 0.062(6) 0.054(6) 0.038(5) -0.013(4) -0.008(4) 0.028(5)
C11_12 0.058(6) 0.085(7) 0.044(5) 0.009(5) -0.001(4) 0.026(5)
C12_12 0.050(6) 0.047(5) 0.057(6) -0.008(5) -0.004(5) 0.019(5)
C13_12 0.043(7) 0.126(10) 0.120(10) -0.029(8) -0.001(6) -0.003(7)
C14_12 0.120(9) 0.075(7) 0.063(7) -0.001(5) 0.002(6) 0.062(7)
C15_12 0.083(7) 0.093(7) 0.066(7) 0.020(6) 0.006(5) 0.059(6)
C16_12 0.084(7) 0.058(6) 0.071(7) 0.039(5) 0.048(6) 0.055(5)
C17_12 0.161(14) 0.29(2) 0.241(18) 0.214(17) 0.139(14) 0.140(15)
C18_12 0.268(17) 0.060(7) 0.107(10) 0.042(7) 0.051(11) 0.047(9)
C19_12 0.182(15) 0.198(14) 0.065(9) 0.084(9) -0.022(9) -0.083(11)
C20_12 0.055(6) 0.045(5) 0.059(6) 0.014(4) 0.023(4) 0.035(4)
C24_12 0.069(6) 0.032(4) 0.044(5) -0.002(4) 0.002(5) 0.025(5)
C25_12 0.090(7) 0.056(6) 0.053(6) -0.008(5) -0.010(5) 0.027(6)
C26_12 0.123(9) 0.054(6) 0.060(6) -0.005(5) 0.033(6) 0.040(6)
C27_12 0.091(7) 0.058(6) 0.077(7) 0.002(5) -0.001(6) 0.052(6)
C28_12 0.064(6) 0.057(5) 0.045(5) 0.020(4) 0.007(4) 0.043(5)
C29_12 0.168(11) 0.087(7) 0.092(8) 0.027(6) 0.012(7) 0.102(8)
C30_12 0.112(8) 0.118(8) 0.077(7) 0.063(7) 0.018(6) 0.075(7)
C31_12 0.080(8) 0.094(8) 0.102(9) 0.037(7) -0.010(6) 0.047(7)
C32_12 0.039(5) 0.032(4) 0.044(5) 0.008(4) 0.008(4) 0.018(4)
C33_12 0.076(6) 0.061(6) 0.068(6) 0.024(5) 0.013(5) 0.043(5)
C34_12 0.070(6) 0.065(6) 0.054(6) 0.039(5) 0.023(5) 0.034(5)
C35_12 0.063(6) 0.039(5) 0.054(6) -0.008(4) 0.009(5) 0.014(4)
Zr1_13 0.0487(5) 0.0413(5) 0.0559(5) 0.0110(4) 0.0025(4) 0.0159(4)
Si1_13 0.0690(18) 0.0562(16) 0.0624(17) 0.0151(13) 0.0087(14) 0.0426(15)
Si2_13 0.0669(17) 0.0396(13) 0.0565(16) 0.0183(12) 0.0123(13) 0.0277(13)
O1_13 0.088(5) 0.043(3) 0.081(5) 0.005(3) -0.036(4) 0.017(3)
O2_13 0.103(6) 0.109(6) 0.111(6) 0.023(5) -0.041(5) 0.048(5)
O3_13 0.148(7) 0.046(4) 0.146(7) 0.044(4) 0.062(5) 0.055(4)
O4_13 0.062(5) 0.127(6) 0.083(5) 0.054(5) 0.009(4) 0.026(4)
O6_13 0.146(7) 0.118(6) 0.097(6) 0.053(5) 0.057(5) 0.060(5)
C1_13 0.071(7) 0.116(10) 0.066(7) 0.017(7) 0.013(6) 0.060(7)
C2_13 0.047(7) 0.093(9) 0.140(12) 0.046(9) 0.018(7) 0.023(7)
C3_13 0.098(11) 0.139(13) 0.226(19) 0.137(14) 0.104(12) 0.051(10)
C4_13 0.107(11) 0.165(13) 0.109(11) 0.097(11) 0.076(9) 0.087(11)
C5_13 0.098(10) 0.148(12) 0.072(9) 0.012(9) 0.026(8) 0.073(9)
C6_13 0.084(8) 0.043(6) 0.080(8) -0.005(5) -0.008(7) 0.005(6)
C7_13 0.095(9) 0.062(7) 0.090(8) 0.028(6) 0.012(7) 0.039(7)
C8_13 0.144(12) 0.053(7) 0.057(7) 0.015(6) 0.020(8) 0.001(7)
C9_13 0.162(14) 0.076(9) 0.185(16) 0.063(10) 0.131(13) 0.084(10)
C10_13 0.061(7) 0.070(8) 0.160(14) 0.040(9) 0.012(8) 0.023(7)
C11_13 0.082(7) 0.073(7) 0.084(7) 0.023(6) -0.010(6) 0.032(6)
C12_13 0.064(6) 0.055(5) 0.060(6) 0.019(5) 0.017(5) 0.037(5)
C13_13 0.176(14) 0.118(11) 0.138(12) -0.010(9) 0.022(10) 0.088(10)
C14_13 0.093(8) 0.126(9) 0.129(10) 0.055(8) 0.027(7) 0.078(8)
C15_13 0.113(9) 0.116(9) 0.086(8) 0.057(7) 0.032(7) 0.078(7)
C16_13 0.125(11) 0.054(7) 0.166(13) 0.003(8) -0.045(10) 0.072(8)
C17_13 0.249(18) 0.234(17) 0.137(12) -0.074(12) -0.124(12) 0.193(16)
C18_13 0.152(13) 0.124(11) 0.154(13) -0.003(10) -0.009(10) 0.104(10)
C19_13 0.128(13) 0.188(16) 0.208(18) 0.095(14) -0.070(13) 0.001(12)
C20_13 0.101(10) 0.132(11) 0.088(9) 0.052(9) 0.049(8) 0.053(9)
C21_13 0.33(2) 0.213(18) 0.129(14) 0.071(13) 0.061(15) 0.175(18)
C22_13 0.29(2) 0.177(16) 0.153(15) 0.075(13) 0.119(14) 0.162(16)
C23_13 0.086(13) 0.41(3) 0.22(2) 0.07(2) 0.034(13) 0.008(16)
C24_13 0.076(8) 0.031(5) 0.120(10) -0.020(6) -0.011(7) 0.021(6)
C25_13 0.155(13) 0.189(14) 0.37(3) 0.220(17) 0.149(15) 0.119(12)
C26_13 0.122(11) 0.099(9) 0.243(17) -0.009(10) 0.006(10) 0.087(9)
C27_13 0.144(13) 0.131(11) 0.234(17) 0.108(12) 0.083(12) 0.092(10)
C28_13 0.081(8) 0.103(9) 0.114(10) 0.065(8) 0.060(8) 0.041(7)
C29_13 0.118(12) 0.220(17) 0.166(15) 0.125(14) 0.034(11) 0.003(11)
C30_13 0.240(18) 0.086(9) 0.154(13) -0.028(10) -0.010(12) 0.097(11)
C31_13 0.098(10) 0.093(9) 0.225(16) -0.027(10) 0.017(10) 0.052(8)
C32_13 0.110(8) 0.088(7) 0.054(6) 0.045(6) 0.040(6) 0.072(7)
C33_13 0.177(14) 0.107(10) 0.136(12) 0.023(9) 0.025(10) 0.078(10)
C34_13 0.135(10) 0.125(10) 0.117(10) 0.064(8) 0.046(8) 0.094(9)
C35_13 0.118(11) 0.120(10) 0.150(12) 0.031(9) 0.060(9) 0.053(9)
Zr1_14 0.0537(5) 0.0262(4) 0.0496(5) -0.0023(4) -0.0088(4) 0.0222(4)
Si1_14 0.0379(13) 0.0338(12) 0.0457(13) 0.0095(10) 0.0027(11) 0.0181(11)
Si2_14 0.0689(17) 0.0319(12) 0.0441(14) 0.0041(10) 0.0049(12) 0.0341(12)
O1_14 0.067(4) 0.029(3) 0.074(4) -0.016(3) -0.030(3) 0.030(3)
O2_14 0.043(3) 0.027(3) 0.046(3) 0.000(2) -0.006(2) 0.019(2)
O3_14 0.076(4) 0.041(3) 0.046(3) -0.008(3) -0.010(3) 0.046(3)
O4_14 0.053(4) 0.042(3) 0.064(4) 0.006(3) -0.017(3) 0.018(3)
O5_14 0.048(3) 0.042(3) 0.056(3) 0.015(3) 0.011(3) 0.031(3)
O6_14 0.054(3) 0.043(3) 0.042(3) 0.012(3) 0.013(3) 0.026(3)
O7_14 0.085(4) 0.047(3) 0.069(4) 0.010(3) 0.013(3) 0.038(3)
O8_14 0.100(5) 0.058(4) 0.053(4) 0.012(3) 0.017(3) 0.059(4)
O9_14 0.076(4) 0.048(3) 0.063(4) 0.002(3) -0.002(3) 0.047(3)
C1_14 0.085(7) 0.082(7) 0.058(6) 0.028(6) 0.033(6) 0.051(6)
C2_14 0.075(7) 0.064(6) 0.055(6) 0.022(5) 0.002(5) 0.022(6)
C3_14 0.095(8) 0.046(6) 0.080(7) 0.037(6) -0.001(6) 0.013(6)
C4_14 0.095(8) 0.051(6) 0.055(6) 0.010(5) -0.020(5) 0.016(6)
C5_14 0.091(8) 0.049(5) 0.038(5) 0.012(5) 0.009(5) 0.023(5)
C6_14 0.071(7) 0.032(5) 0.071(6) 0.009(5) 0.009(6) 0.018(5)
C7_14 0.047(5) 0.024(4) 0.059(6) 0.005(4) 0.008(5) 0.012(4)
C8_14 0.062(6) 0.048(5) 0.044(5) 0.010(4) 0.007(5) 0.016(5)
C9_14 0.075(7) 0.063(6) 0.084(8) 0.004(6) 0.025(6) 0.039(6)
C10_14 0.044(6) 0.052(6) 0.102(8) 0.009(6) 0.002(6) 0.019(5)
C11_14 0.092(8) 0.062(6) 0.096(8) -0.014(6) -0.044(6) 0.050(6)
C12_14 0.057(7) 0.043(6) 0.118(10) 0.005(6) -0.032(7) 0.002(5)
C13_14 0.063(8) 0.078(8) 0.184(13) 0.016(8) -0.040(8) 0.000(6)
C14_14 0.101(9) 0.086(8) 0.121(11) 0.057(8) 0.018(8) 0.010(7)
C15_14 0.133(11) 0.050(6) 0.148(12) -0.011(7) -0.027(8) 0.038(7)
C16_14 0.061(6) 0.067(6) 0.081(7) 0.028(5) 0.020(5) 0.052(5)
C17_14 0.086(8) 0.097(8) 0.143(11) -0.008(8) -0.040(7) 0.067(7)
C18_14 0.087(7) 0.087(7) 0.114(9) 0.030(6) 0.042(7) 0.067(6)
C19_14 0.081(7) 0.064(6) 0.127(9) 0.046(6) 0.043(6) 0.054(6)
C20_14 0.059(6) 0.077(6) 0.040(5) 0.025(5) 0.016(5) 0.035(5)
C22_14 0.143(12) 0.234(16) 0.098(9) 0.061(10) 0.076(9) 0.126(12)
C23_14 0.36(2) 0.206(16) 0.163(14) 0.145(13) 0.195(16) 0.209(17)
C24_14 0.100(8) 0.053(6) 0.072(7) 0.025(5) 0.028(6) 0.034(6)
C25_14 0.111(10) 0.095(9) 0.143(12) 0.035(9) 0.021(9) 0.014(8)
C26_14 0.168(11) 0.089(8) 0.111(9) 0.063(7) 0.045(8) 0.085(8)
C27_14 0.161(11) 0.098(8) 0.107(9) 0.028(7) 0.072(8) 0.079(8)
C28_14 0.146(10) 0.075(7) 0.037(5) -0.002(5) 0.022(6) 0.083(7)
C29_14 0.260(17) 0.108(9) 0.140(12) 0.053(9) 0.137(12) 0.124(11)
C30_14 0.324(19) 0.185(13) 0.077(8) 0.031(8) 0.056(10) 0.227(14)
C31_14 0.179(13) 0.105(9) 0.079(8) -0.036(7) -0.019(9) 0.079(10)
C32_14 0.064(7) 0.064(6) 0.104(8) 0.020(6) 0.003(6) 0.051(6)
C33_14 0.100(8) 0.077(7) 0.074(7) 0.000(6) -0.012(6) 0.055(6)
C34_14 0.124(10) 0.138(10) 0.147(11) 0.024(9) 0.006(8) 0.111(9)
C35_14 0.084(8) 0.086(8) 0.122(10) 0.038(7) 0.019(7) 0.048(7)
Zr1_15 0.0556(5) 0.0269(4) 0.0366(4) 0.0065(3) 0.0047(4) 0.0197(4)
Si1_15 0.0399(13) 0.0303(11) 0.0447(13) 0.0124(10) 0.0080(10) 0.0222(10)
Si2_15 0.0532(14) 0.0418(13) 0.0456(14) 0.0094(11) 0.0086(11) 0.0370(12)
O1_15 0.049(3) 0.041(3) 0.047(3) -0.003(3) 0.002(3) 0.015(3)
O2_15 0.043(3) 0.033(3) 0.064(4) 0.002(3) -0.004(3) 0.027(3)
O3_15 0.077(4) 0.062(3) 0.049(3) 0.002(3) -0.003(3) 0.058(3)
O4_15 0.042(3) 0.029(3) 0.068(4) 0.012(3) -0.001(3) 0.019(3)
O5_15 0.051(3) 0.056(3) 0.046(3) 0.020(3) 0.017(3) 0.036(3)
O6_15 0.053(3) 0.035(3) 0.047(3) 0.012(2) 0.009(3) 0.027(3)
O9_15 0.189(7) 0.161(6) 0.042(4) 0.022(4) 0.017(4) 0.165(6)
C1_15 0.047(6) 0.072(7) 0.068(6) -0.006(5) 0.020(5) 0.025(5)
C2_15 0.060(6) 0.050(5) 0.046(5) 0.013(4) 0.016(4) 0.018(5)
C3_15 0.090(7) 0.039(5) 0.070(7) 0.021(5) 0.013(6) 0.029(6)
C4_15 0.081(7) 0.062(6) 0.061(6) 0.025(5) 0.006(6) 0.033(6)
C5_15 0.071(7) 0.065(6) 0.034(5) 0.000(5) 0.013(5) 0.019(6)
C6_15 0.153(14) 0.037(6) 0.133(12) 0.005(7) -0.042(12) 0.045(8)
C7_15 0.195(16) 0.074(8) 0.109(11) 0.009(8) -0.026(11) 0.095(10)
C8_15 0.146(12) 0.027(5) 0.067(8) 0.011(5) -0.026(8) 0.025(7)
C9_15 0.192(15) 0.066(8) 0.083(10) 0.056(8) 0.053(11) 0.031(9)
C10_15 0.088(9) 0.043(6) 0.094(10) 0.028(6) 0.003(8) 0.012(6)
C11_15 0.076(7) 0.074(6) 0.076(7) -0.012(5) 0.007(5) 0.044(6)
C12_15 0.043(5) 0.031(4) 0.051(5) 0.009(4) -0.004(4) 0.014(4)
C13_15 0.061(6) 0.037(5) 0.088(7) 0.008(5) -0.027(5) 0.010(5)
C14_15 0.049(5) 0.037(4) 0.069(6) 0.021(4) 0.003(4) 0.021(4)
C15_15 0.116(8) 0.064(6) 0.051(6) 0.006(5) 0.016(6) 0.055(6)
C16_15 0.057(6) 0.053(5) 0.047(5) 0.019(4) 0.020(4) 0.033(5)
C17_15 0.092(7) 0.119(8) 0.086(7) 0.050(7) 0.042(6) 0.085(7)
C18_15 0.069(7) 0.069(6) 0.112(9) 0.038(6) 0.042(6) 0.035(6)
C19_15 0.088(8) 0.083(7) 0.088(8) -0.024(6) 0.000(6) 0.053(6)
C20_15 0.064(6) 0.044(5) 0.046(5) 0.019(4) 0.008(5) 0.025(5)
C21_15 0.102(9) 0.119(9) 0.090(8) 0.063(7) -0.029(7) 0.009(7)
C22_15 0.189(12) 0.043(6) 0.120(9) 0.027(6) 0.110(9) 0.044(7)
C23_15 0.087(7) 0.037(5) 0.087(7) 0.027(5) 0.033(6) 0.031(5)
C24_15 0.055(6) 0.060(6) 0.055(6) -0.013(5) -0.004(5) 0.036(5)
C25_15 0.085(7) 0.071(7) 0.079(7) 0.003(6) -0.004(6) 0.043(6)
C26_15 0.097(8) 0.062(6) 0.087(7) -0.001(5) 0.027(6) 0.055(6)
C27_15 0.190(15) 0.37(2) 0.252(18) 0.246(18) 0.177(14) 0.223(17)
C28_15 0.066(7) 0.106(9) 0.096(9) 0.042(7) 0.038(7) 0.048(7)
C29_15 0.169(14) 0.267(19) 0.107(10) -0.071(12) -0.023(10) 0.171(15)
C30_15 0.111(10) 0.094(9) 0.112(10) 0.037(8) -0.004(8) 0.015(8)
C31_15 0.099(9) 0.086(8) 0.157(12) -0.019(8) 0.037(8) 0.035(7)
C32_15 0.113(9) 0.083(7) 0.050(6) 0.006(6) 0.002(6) 0.077(7)
C33_15 0.120(9) 0.101(8) 0.083(8) 0.006(7) -0.019(7) 0.083(8)
C34_15 0.209(13) 0.171(11) 0.076(8) -0.013(8) -0.012(8) 0.173(11)
C35_15 0.161(12) 0.102(9) 0.118(11) 0.032(8) 0.008(9) 0.087(9)
Zr1_16 0.0474(5) 0.0290(4) 0.0485(5) 0.0058(4) 0.0190(4) 0.0131(4)
Si1_16 0.0438(13) 0.0311(11) 0.0385(12) 0.0130(10) 0.0134(10) 0.0263(11)
Si2_16 0.0436(13) 0.0263(11) 0.0473(14) 0.0059(10) 0.0127(11) 0.0244(10)
O1_16 0.049(3) 0.027(3) 0.056(3) 0.006(2) 0.016(3) 0.018(3)
O2_16 0.042(3) 0.024(2) 0.044(3) 0.007(2) 0.011(2) 0.024(2)
O3_16 0.074(4) 0.035(3) 0.105(5) -0.011(3) -0.017(3) 0.045(3)
O4_16 0.046(3) 0.044(3) 0.042(3) 0.007(3) 0.006(2) 0.031(3)
O5_16 0.068(4) 0.048(3) 0.050(3) 0.023(3) 0.024(3) 0.047(3)
O6_16 0.046(3) 0.031(3) 0.039(3) 0.012(2) 0.017(2) 0.026(2)
O7A_16 0.043(4) 0.017(3) 0.041(4) 0.000(3) 0.018(3) 0.017(3)
O8A_16 0.041(4) 0.026(4) 0.047(5) 0.013(3) 0.011(4) 0.020(3)
O9_16 0.054(4) 0.038(3) 0.107(5) -0.017(3) -0.016(3) 0.034(3)
C1_16 0.198(15) 0.065(9) 0.073(9) 0.035(7) 0.070(10) 0.053(10)
C2_16 0.088(8) 0.093(8) 0.046(6) 0.025(6) 0.025(5) 0.044(7)
C3_16 0.113(10) 0.094(8) 0.042(6) 0.010(6) 0.024(6) 0.069(8)
C4_16 0.076(10) 0.231(18) 0.058(8) 0.006(10) 0.027(7) 0.082(12)
C5_16 0.145(14) 0.092(10) 0.077(9) -0.010(8) 0.077(10) -0.041(11)
C6_16 0.085(8) 0.029(5) 0.081(8) 0.009(5) 0.019(6) 0.016(5)
C7_16 0.081(7) 0.040(5) 0.067(6) 0.005(5) 0.011(6) 0.035(5)
C8_16 0.074(6) 0.035(5) 0.060(6) 0.008(4) 0.028(5) 0.035(5)
C9_16 0.081(7) 0.029(5) 0.047(5) 0.008(4) 0.013(5) 0.028(5)
C10_16 0.069(7) 0.037(5) 0.063(7) -0.020(5) -0.016(5) 0.016(5)
C11_16 0.052(6) 0.046(5) 0.088(7) 0.009(5) 0.017(5) 0.019(5)
C12_16 0.057(6) 0.048(5) 0.046(5) 0.005(4) 0.006(4) 0.034(5)
C13_16 0.074(7) 0.071(6) 0.091(8) -0.006(6) -0.013(6) 0.045(6)
C14_16 0.099(8) 0.075(6) 0.049(6) 0.003(5) 0.009(5) 0.052(6)
C15_16 0.054(6) 0.035(5) 0.106(8) 0.016(5) 0.009(5) 0.025(4)
C16_16 0.078(7) 0.047(5) 0.057(6) 0.025(4) 0.023(5) 0.045(5)
C17_16 0.095(8) 0.070(6) 0.103(8) 0.026(6) 0.012(6) 0.066(6)
C18_16 0.196(12) 0.128(9) 0.094(8) 0.080(7) 0.077(8) 0.131(9)
C19_16 0.114(8) 0.037(5) 0.113(9) 0.018(6) 0.010(7) 0.048(6)
C20_16 0.049(5) 0.050(5) 0.030(4) 0.019(4) 0.019(4) 0.028(4)
C21_16 0.081(6) 0.071(6) 0.063(6) 0.034(5) 0.028(5) 0.056(5)
C22_16 0.053(5) 0.051(5) 0.059(6) 0.021(4) 0.024(4) 0.032(4)
C23_16 0.094(8) 0.085(7) 0.045(6) 0.017(5) 0.027(5) 0.037(6)
C24_16 0.104(8) 0.082(7) 0.047(6) 0.007(5) 0.022(6) 0.071(7)
C25_16 0.095(8) 0.076(7) 0.083(7) 0.012(6) 0.023(6) 0.057(7)
C26_16 0.127(9) 0.098(8) 0.068(7) 0.012(6) 0.032(6) 0.094(7)
C27_16 0.107(9) 0.089(8) 0.092(9) 0.016(7) 0.014(7) 0.053(7)
C28_16 0.070(7) 0.062(6) 0.170(12) 0.079(8) 0.068(8) 0.047(6)
C29_16 0.173(13) 0.122(11) 0.111(11) 0.026(9) 0.027(9) 0.099(10)
C30_16 0.203(14) 0.131(10) 0.270(17) 0.144(11) 0.163(13) 0.144(11)
C31_16 0.106(10) 0.103(9) 0.168(13) 0.082(9) 0.038(9) 0.047(8)
C32_16 0.053(6) 0.049(5) 0.080(7) -0.011(5) -0.006(5) 0.036(5)
C33_16 0.083(8) 0.090(8) 0.091(8) 0.008(7) 0.011(6) 0.054(7)
C34_16 0.073(7) 0.074(6) 0.101(8) -0.008(6) -0.015(6) 0.060(6)
C35_16 0.102(8) 0.082(7) 0.079(7) 0.007(6) 0.002(6) 0.066(7)
Zr1_17 0.0399(4) 0.0267(4) 0.0382(4) 0.0100(3) 0.0092(3) 0.0208(3)
Si1_17 0.0388(13) 0.0282(11) 0.0384(13) 0.0085(9) 0.0077(10) 0.0192(10)
Si2_17 0.0749(18) 0.0490(14) 0.097(2) 0.0364(14) 0.0459(16) 0.0516(14)
O1_17 0.048(3) 0.025(3) 0.060(3) 0.004(2) 0.009(3) 0.021(3)
O2_17 0.044(3) 0.059(3) 0.042(3) 0.011(3) 0.010(3) 0.031(3)
O3_17 0.073(4) 0.027(3) 0.067(4) 0.004(3) -0.003(3) 0.030(3)
O4_17 0.042(3) 0.028(3) 0.052(3) 0.008(2) 0.005(3) 0.020(2)
O5_17 0.050(3) 0.034(3) 0.042(3) 0.012(2) 0.004(3) 0.023(3)
O6_17 0.050(3) 0.038(3) 0.034(3) 0.006(2) 0.006(2) 0.028(3)
O8_17 0.073(4) 0.094(5) 0.078(5) 0.046(4) 0.021(4) 0.042(4)
C1_17 0.062(7) 0.080(7) 0.113(9) 0.068(7) 0.045(6) 0.058(6)
C2_17 0.068(7) 0.030(5) 0.077(7) 0.020(5) -0.024(6) 0.014(5)
C3_17 0.088(7) 0.044(5) 0.046(5) 0.017(4) 0.026(5) 0.048(5)
C4_17 0.054(5) 0.032(4) 0.060(6) 0.018(4) 0.007(5) 0.023(4)
C5_17 0.109(8) 0.047(5) 0.047(5) 0.017(4) 0.028(6) 0.061(6)
C6_17 0.086(7) 0.061(6) 0.041(5) 0.023(4) 0.025(5) 0.044(5)
C7_17 0.069(6) 0.059(6) 0.062(6) 0.040(5) 0.039(5) 0.034(5)
C8_17 0.089(7) 0.076(7) 0.074(7) 0.050(6) 0.033(6) 0.061(6)
C9_17 0.056(6) 0.082(7) 0.052(6) 0.026(5) 0.001(5) 0.033(6)
C10_17 0.054(6) 0.049(5) 0.044(5) 0.007(4) 0.005(4) 0.015(5)
C11_17 0.048(5) 0.046(5) 0.080(6) 0.019(5) 0.018(5) 0.033(4)
C12_17 0.055(6) 0.024(4) 0.051(5) 0.001(4) 0.000(4) 0.014(4)
C13_17 0.046(6) 0.040(5) 0.101(8) 0.008(5) -0.006(5) 0.004(5)
C14_17 0.116(8) 0.047(5) 0.051(6) -0.013(5) 0.006(5) 0.039(6)
C15_17 0.077(6) 0.036(5) 0.069(6) 0.019(4) 0.011(5) 0.029(5)
C16_17 0.058(6) 0.040(5) 0.048(5) 0.019(4) 0.011(4) 0.029(4)
C17_17 0.057(6) 0.053(5) 0.060(6) 0.021(4) 0.010(4) 0.035(5)
C18_17 0.084(7) 0.094(7) 0.057(6) 0.042(5) 0.026(5) 0.060(6)
C19_17 0.084(7) 0.047(5) 0.098(8) 0.033(5) 0.008(6) 0.035(5)
C20_17 0.042(5) 0.037(4) 0.036(5) 0.006(4) 0.011(4) 0.016(4)
C21_17 0.051(6) 0.053(5) 0.060(6) 0.009(4) 0.022(4) 0.022(5)
C22_17 0.080(6) 0.057(5) 0.048(5) 0.017(4) 0.025(5) 0.041(5)
C23_17 0.064(6) 0.035(4) 0.058(5) -0.001(4) 0.016(4) 0.027(4)
C24_17 0.166(11) 0.087(8) 0.066(7) -0.002(6) 0.017(7) 0.104(8)
C26_17 0.225(16) 0.067(8) 0.205(16) -0.035(9) -0.064(12) 0.098(10)
C27_17 0.58(4) 0.34(3) 0.112(14) 0.107(17) 0.16(2) 0.32(3)
C28_17 0.057(6) 0.061(6) 0.063(6) 0.016(5) 0.006(5) 0.026(5)
C29_17 0.36(3) 0.132(13) 0.074(10) -0.025(9) 0.071(13) 0.015(15)
C30_17 0.065(7) 0.141(10) 0.130(10) 0.104(9) 0.026(7) 0.032(7)
C31_17 0.131(12) 0.41(3) 0.36(3) 0.34(2) 0.118(14) 0.178(16)
C32_17 0.058(8) 0.053(7) 0.30(2) 0.072(10) 0.100(10) 0.038(6)
C33_17 0.083(10) 0.057(8) 0.35(2) 0.041(11) 0.106(12) 0.036(7)
C34_17 0.075(9) 0.070(8) 0.43(3) -0.065(12) -0.039(12) 0.051(7)
C35_17 0.224(17) 0.099(10) 0.233(19) 0.051(12) 0.180(16) 0.045(11)
Zr1_18 0.0600(5) 0.0537(5) 0.0415(5) 0.0214(4) 0.0164(4) 0.0424(4)
Si1_18 0.0343(13) 0.0430(13) 0.0503(14) -0.0065(11) 0.0107(11) 0.0170(11)
Si2_18 0.0467(13) 0.0381(12) 0.0368(12) 0.0151(10) 0.0142(10) 0.0294(11)
O1_18 0.079(5) 0.091(5) 0.046(4) 0.034(4) -0.024(3) -0.020(4)
O2_18 0.048(4) 0.050(4) 0.157(7) -0.040(4) 0.064(4) -0.015(3)
O3_18 0.079(4) 0.079(4) 0.046(4) 0.036(3) 0.013(3) 0.038(3)
O7_18 0.123(6) 0.058(4) 0.071(5) -0.002(4) 0.048(4) 0.008(4)
O8_18 0.101(5) 0.147(6) 0.165(7) 0.127(6) 0.085(5) 0.100(5)
O9_18 0.049(4) 0.055(3) 0.061(4) 0.030(3) 0.015(3) 0.028(3)
C1A_18 0.062(6) 0.046(5) 0.157(11) 0.054(7) 0.041(7) 0.036(5)
C8A_18 0.110(9) 0.066(7) 0.076(7) -0.012(6) 0.046(7) 0.050(7)
C10A_18 0.089(9) 0.097(9) 0.066(7) -0.056(7) 0.005(7) 0.015(7)
C11_18 0.082(7) 0.054(5) 0.084(7) 0.034(5) 0.035(6) 0.027(5)
C12_18 0.074(8) 0.059(6) 0.101(9) -0.030(6) -0.053(7) 0.040(6)
C13_18 0.137(12) 0.109(10) 0.101(10) -0.020(8) -0.012(9) 0.039(10)
C14_18 0.231(15) 0.137(10) 0.103(9) -0.067(8) -0.077(9) 0.162(11)
C15_18 0.128(11) 0.108(9) 0.217(16) 0.069(10) 0.047(10) 0.094(9)
C16_18 0.051(6) 0.067(6) 0.063(6) 0.021(5) 0.025(5) 0.024(5)
C17_18 0.062(7) 0.086(8) 0.224(14) 0.066(9) 0.063(8) 0.038(6)
C18_18 0.100(10) 0.168(13) 0.165(13) -0.077(10) -0.012(8) 0.088(10)
C19_18 0.086(9) 0.147(11) 0.123(10) -0.065(9) -0.034(7) 0.077(8)
C20_18 0.077(7) 0.050(5) 0.063(6) 0.014(5) 0.034(5) 0.037(5)
C21_18 0.257(17) 0.177(13) 0.102(10) -0.022(10) -0.041(11) 0.179(14)
C22_18 0.179(17) 0.135(14) 0.36(3) 0.117(17) 0.045(18) -0.037(12)
C23_18 0.260(18) 0.171(13) 0.140(12) 0.068(11) 0.124(13) 0.161(14)
C24_18 0.109(8) 0.046(5) 0.057(6) 0.009(5) 0.030(6) 0.045(6)
C25_18 0.141(13) 0.133(11) 0.086(9) -0.006(8) -0.013(8) 0.037(10)
C26_18 0.282(17) 0.086(8) 0.055(7) 0.025(6) 0.066(9) 0.104(10)
C27_18 0.267(19) 0.176(14) 0.210(17) 0.075(13) 0.056(14) 0.175(15)
C28_18 0.067(6) 0.070(6) 0.055(6) 0.028(5) 0.021(5) 0.057(5)
C29_18 0.094(10) 0.193(14) 0.153(12) -0.089(11) -0.023(8) 0.081(10)
C30_18 0.108(8) 0.096(8) 0.104(8) 0.061(7) 0.042(7) 0.075(7)
C31_18 0.094(8) 0.129(9) 0.092(8) 0.068(7) 0.039(6) 0.084(7)
C32_18 0.045(5) 0.036(5) 0.085(7) 0.020(5) 0.020(5) 0.025(4)
C33_18 0.075(7) 0.051(6) 0.091(8) 0.014(6) 0.008(6) 0.020(5)
C34_18 0.080(7) 0.089(7) 0.113(9) 0.063(7) 0.050(6) 0.052(6)
C35_18 0.091(8) 0.102(8) 0.126(9) 0.052(7) 0.038(7) 0.082(7)
 
_geom_special_details
;
  All esds (except the esd in the dihedral angle between two l.s. planes)
  are estimated using the full covariance matrix.  The cell esds are taken
  into account individually in the estimation of esds in distances, angles
  and torsion angles; correlations between esds in cell parameters are only
  used when they are defined by crystal symmetry.  An approximate (isotropic)
  treatment of cell esds is used for estimating esds involving l.s. planes.
;
 
loop_
  _geom_bond_atom_site_label_1
  _geom_bond_atom_site_label_2
  _geom_bond_distance
  _geom_bond_site_symmetry_2
  _geom_bond_publ_flag
Zr1_1 O1_1 1.986(4) . ?
Zr1_1 C11_1 2.293(6) . ?
Zr1_1 C7_1 2.477(8) . ?
Zr1_1 C8_1 2.494(8) . ?
Zr1_1 C1_1 2.500(7) . ?
Zr1_1 C10_1 2.532(7) . ?
Zr1_1 C6_1 2.536(7) . ?
Zr1_1 C9_1 2.538(8) . ?
Zr1_1 C2_1 2.539(7) . ?
Zr1_1 C4_1 2.544(7) . ?
Zr1_1 C5_1 2.544(7) . ?
Zr1_1 C3_1 2.544(7) . ?
Si1_1 O6_1 1.585(5) . ?
Si1_1 O4_1 1.601(5) . ?
Si1_1 O5_1 1.604(6) . ?
Si1_1 O2_1 1.616(4) . ?
Si2_1 O3_1 1.611(4) . ?
Si2_1 O7_1 1.614(5) . ?
Si2_1 O8_1 1.616(5) . ?
Si2_1 O9_1 1.622(4) . ?
O1_1 B1_1 1.326(8) . ?
O2_1 B1_1 1.364(8) . ?
O3_1 B1_1 1.392(8) . ?
O4_1 C12_1 1.435(7) . ?
O5_1 C16_1 1.420(8) . ?
O6_1 C20_1 1.430(8) . ?
O7_1 C24_1 1.438(9) . ?
O8_1 C28_1 1.471(7) . ?
O9_1 C32_1 1.432(8) . ?
C1_1 C5_1 1.395(9) . ?
C1_1 C2_1 1.396(9) . ?
C2_1 C3_1 1.398(10) . ?
C3_1 C4_1 1.415(10) . ?
C4_1 C5_1 1.392(9) . ?
C6_1 C10_1 1.344(10) . ?
C6_1 C7_1 1.372(11) . ?
C7_1 C8_1 1.370(12) . ?
C8_1 C9_1 1.373(11) . ?
C9_1 C10_1 1.392(11) . ?
C12_1 C14_1 1.507(10) . ?
C12_1 C15_1 1.521(10) . ?
C12_1 C13_1 1.531(9) . ?
C16_1 C18_1 1.499(11) . ?
C16_1 C17_1 1.503(9) . ?
C16_1 C19_1 1.513(10) . ?
C20_1 C22_1 1.474(11) . ?
C20_1 C23_1 1.494(10) . ?
C20_1 C21_1 1.506(10) . ?
C24_1 C27_1 1.497(10) . ?
C24_1 C26_1 1.517(11) . ?
C24_1 C25_1 1.517(10) . ?
C28_1 C29_1 1.496(10) . ?
C28_1 C31_1 1.500(10) . ?
C28_1 C30_1 1.530(10) . ?
C32_1 C34_1 1.524(9) . ?
C32_1 C35_1 1.528(10) . ?
C32_1 C33_1 1.529(10) . ?
Zr1_2 O1_2 1.978(4) . ?
Zr1_2 C11_2 2.277(7) . ?
Zr1_2 C1_2 2.502(7) . ?
Zr1_2 C2_2 2.518(7) . ?
Zr1_2 C4_2 2.521(8) . ?
Zr1_2 C7_2 2.522(7) . ?
Zr1_2 C9_2 2.522(8) . ?
Zr1_2 C3_2 2.541(8) . ?
Zr1_2 C5_2 2.543(8) . ?
Zr1_2 C6_2 2.544(7) . ?
Zr1_2 C10_2 2.547(8) . ?
Zr1_2 C8_2 2.548(8) . ?
Si1_2 O6_2 1.594(5) . ?
Si1_2 O2_2 1.596(5) . ?
Si1_2 O5_2 1.624(5) . ?
Si1_2 O4_2 1.627(5) . ?
Si2_2 O9_2 1.605(5) . ?
Si2_2 O8_2 1.612(5) . ?
Si2_2 O7_2 1.618(5) . ?
Si2_2 O3_2 1.619(4) . ?
O1_2 B1_2 1.319(9) . ?
O2_2 B1_2 1.383(9) . ?
O3_2 B1_2 1.394(8) . ?
O4_2 C12_2 1.425(9) . ?
O5_2 C16_2 1.460(8) . ?
O6_2 C20_2 1.457(9) . ?
O7_2 C24_2 1.454(8) . ?
O8_2 C28_2 1.439(8) . ?
O9_2 C32_2 1.452(8) . ?
C1_2 C2_2 1.373(10) . ?
C1_2 C5_2 1.384(11) . ?
C2_2 C3_2 1.382(11) . ?
C3_2 C4_2 1.361(11) . ?
C4_2 C5_2 1.414(12) . ?
C6_2 C10_2 1.366(11) . ?
C6_2 C7_2 1.388(11) . ?
C7_2 C8_2 1.400(11) . ?
C8_2 C9_2 1.384(12) . ?
C9_2 C10_2 1.399(12) . ?
C12_2 C13_2 1.491(12) . ?
C12_2 C14_2 1.523(12) . ?
C12_2 C15_2 1.556(11) . ?
C16_2 C17_2 1.497(12) . ?
C16_2 C19_2 1.508(11) . ?
C16_2 C18_2 1.544(11) . ?
C20_2 C21A_2 1.25(2) . ?
C20_2 C21B_2 1.33(2) . ?
C20_2 C22A_2 1.610(18) . ?
C20_2 C22B_2 1.616(16) . ?
C20_2 C23B_2 1.649(17) . ?
C20_2 C23A_2 1.679(19) . ?
C24_2 C25_2 1.527(10) . ?
C24_2 C26_2 1.530(9) . ?
C24_2 C27_2 1.531(10) . ?
C28_2 C31_2 1.495(10) . ?
C28_2 C30_2 1.529(9) . ?
C28_2 C29_2 1.542(10) . ?
C32_2 C35_2 1.503(10) . ?
C32_2 C33_2 1.521(10) . ?
C32_2 C34_2 1.527(9) . ?
Zr1_3 O1_3 1.949(5) . ?
Zr1_3 C11_3 2.280(7) . ?
Zr1_3 C8_3 2.477(8) . ?
Zr1_3 C7_3 2.485(9) . ?
Zr1_3 C1_3 2.486(14) . ?
Zr1_3 C5_3 2.493(16) . ?
Zr1_3 C3_3 2.496(11) . ?
Zr1_3 C2_3 2.496(14) . ?
Zr1_3 C10_3 2.504(11) . ?
Zr1_3 C6_3 2.508(11) . ?
Zr1_3 C4_3 2.511(13) . ?
Zr1_3 C9_3 2.511(9) . ?
Si1_3 O4_3 1.589(5) . ?
Si1_3 O6_3 1.611(5) . ?
Si1_3 O5_3 1.619(5) . ?
Si1_3 O2_3 1.623(5) . ?
Si2_3 O7_3 1.585(5) . ?
Si2_3 O9_3 1.605(5) . ?
Si2_3 O3_3 1.606(5) . ?
Si2_3 O8_3 1.609(5) . ?
O1_3 B1_3 1.331(9) . ?
O2_3 B1_3 1.374(9) . ?
O3_3 B1_3 1.362(9) . ?
O4_3 C12_3 1.452(8) . ?
O5_3 C16_3 1.446(8) . ?
O6_3 C20_3 1.464(9) . ?
O7_3 C24_3 1.447(8) . ?
O8_3 C28_3 1.435(9) . ?
O9_3 C32_3 1.408(9) . ?
C1_3 C2_3 1.31(3) . ?
C1_3 C5_3 1.45(3) . ?
C2_3 C3_3 1.39(2) . ?
C3_3 C4_3 1.35(3) . ?
C4_3 C5_3 1.36(3) . ?
C6_3 C7_3 1.336(16) . ?
C6_3 C10_3 1.373(16) . ?
C7_3 C8_3 1.403(14) . ?
C8_3 C9_3 1.394(14) . ?
C9_3 C10_3 1.357(17) . ?
C12_3 C13_3 1.482(10) . ?
C12_3 C15_3 1.504(11) . ?
C12_3 C14_3 1.511(11) . ?
C16_3 C18_3 1.506(10) . ?
C16_3 C19_3 1.518(10) . ?
C16_3 C17_3 1.535(10) . ?
C20_3 C22_3 1.441(13) . ?
C20_3 C21_3 1.491(12) . ?
C20_3 C23_3 1.501(11) . ?
C24_3 C26_3 1.505(11) . ?
C24_3 C27_3 1.517(12) . ?
C24_3 C25_3 1.523(11) . ?
C28_3 C31_3 1.464(11) . ?
C28_3 C30_3 1.475(11) . ?
C28_3 C29_3 1.510(10) . ?
C32_3 C33_3 1.504(11) . ?
C32_3 C35_3 1.531(10) . ?
C32_3 C34_3 1.544(10) . ?
Zr1_4 O1_4 1.993(4) . ?
Zr1_4 C11_4 2.297(7) . ?
Zr1_4 C2_4 2.474(9) . ?
Zr1_4 C1_4 2.485(11) . ?
Zr1_4 C5_4 2.492(11) . ?
Zr1_4 C8_4 2.497(7) . ?
Zr1_4 C9_4 2.508(7) . ?
Zr1_4 C3_4 2.516(9) . ?
Zr1_4 C7_4 2.520(7) . ?
Zr1_4 C4_4 2.527(10) . ?
Zr1_4 C6_4 2.544(7) . ?
Zr1_4 C10_4 2.555(7) . ?
Si1_4 O4_4 1.606(5) . ?
Si1_4 O6_4 1.619(5) . ?
Si1_4 O5_4 1.621(5) . ?
Si1_4 O2_4 1.633(5) . ?
Si2_4 O7_4 1.598(5) . ?
Si2_4 O9_4 1.605(5) . ?
Si2_4 O8_4 1.616(6) . ?
Si2_4 O3_4 1.623(4) . ?
O1_4 B1_4 1.339(9) . ?
O2_4 B1_4 1.350(9) . ?
O3_4 B1_4 1.380(9) . ?
O4_4 C12_4 1.446(8) . ?
O5_4 C16_4 1.464(8) . ?
O6_4 C20\_4 1.462(8) . ?
O7_4 C24_4 1.456(8) . ?
O8_4 C28_4 1.432(10) . ?
O9_4 C32_4 1.446(9) . ?
C1_4 C5_4 1.35(2) . ?
C1_4 C2_4 1.367(19) . ?
C2_4 C3_4 1.317(14) . ?
C3_4 C4_4 1.292(14) . ?
C4_4 C5_4 1.307(18) . ?
C6_4 C7_4 1.396(11) . ?
C6_4 C10_4 1.393(11) . ?
C7_4 C8_4 1.396(10) . ?
C8_4 C9_4 1.377(11) . ?
C9_4 C10_4 1.415(11) . ?
C12_4 C14_4 1.504(10) . ?
C12_4 C15_4 1.521(10) . ?
C12_4 C13_4 1.527(10) . ?
C16_4 C19_4 1.487(10) . ?
C16_4 C18_4 1.506(11) . ?
C16_4 C17_4 1.533(11) . ?
C20\_4 C23_4 1.507(10) . ?
C20\_4 C21_4 1.523(9) . ?
C20\_4 C22_4 1.538(9) . ?
C24_4 C26_4 1.511(9) . ?
C24_4 C25_4 1.513(10) . ?
C24_4 C27_4 1.537(11) . ?
C28_4 C30_4 1.518(12) . ?
C28_4 C29_4 1.524(15) . ?
C28_4 C31_4 1.523(15) . ?
C32_4 C35_4 1.481(11) . ?
C32_4 C33_4 1.522(11) . ?
C32_4 C34_4 1.527(10) . ?
Zr1_5 O1_5 1.971(4) . ?
Zr1_5 C11_5 2.280(8) . ?
Zr1_5 C1_5 2.492(7) . ?
Zr1_5 C6_5 2.493(9) . ?
Zr1_5 C8_5 2.495(9) . ?
Zr1_5 C10_5 2.504(10) . ?
Zr1_5 C7_5 2.512(8) . ?
Zr1_5 C2_5 2.515(7) . ?
Zr1_5 C9_5 2.520(10) . ?
Zr1_5 C5_5 2.532(8) . ?
Zr1_5 C4_5 2.536(8) . ?
Zr1_5 C3_5 2.550(7) . ?
Si1_5 O5_5 1.614(5) . ?
Si1_5 O6_5 1.615(5) . ?
Si1_5 O4_5 1.626(4) . ?
Si1_5 O2_5 1.630(4) . ?
Si2_5 O7_5 1.595(5) . ?
Si2_5 O3_5 1.610(5) . ?
Si2_5 O8_5 1.620(4) . ?
Si2_5 O9_5 1.619(5) . ?
O1_5 B1_5 1.329(8) . ?
O2_5 B1_5 1.378(8) . ?
O3_5 B1_5 1.382(8) . ?
O4_5 C16_5 1.451(8) . ?
O5_5 C20_5 1.454(8) . ?
O6_5 C12_5 1.450(9) . ?
O7_5 C24_5 1.490(7) . ?
O8_5 C28_5 1.447(8) . ?
O9_5 C32_5 1.438(8) . ?
C1_5 C2_5 1.354(12) . ?
C1_5 C5_5 1.440(12) . ?
C2_5 C3_5 1.384(11) . ?
C3_5 C4_5 1.413(12) . ?
C4_5 C5_5 1.381(12) . ?
C6_5 C7_5 1.375(13) . ?
C6_5 C10_5 1.404(15) . ?
C7_5 C8_5 1.349(13) . ?
C8_5 C9_5 1.387(14) . ?
C9_5 C10_5 1.398(16) . ?
C12_5 C15_5 1.501(10) . ?
C12_5 C13_5 1.519(10) . ?
C12_5 C14_5 1.538(10) . ?
C16_5 C18_5 1.507(9) . ?
C16_5 C19_5 1.516(10) . ?
C16_5 C17_5 1.535(10) . ?
C20_5 C22_5 1.414(11) . ?
C20_5 C23_5 1.464(12) . ?
C20_5 C21_5 1.502(12) . ?
C24_5 C27_5 1.514(10) . ?
C24_5 C25_5 1.524(9) . ?
C24_5 C26_5 1.526(10) . ?
C28_5 C30_5 1.458(11) . ?
C28_5 C31_5 1.470(11) . ?
C28_5 C29_5 1.473(9) . ?
C32_5 C35_5 1.523(9) . ?
C32_5 C34_5 1.524(9) . ?
C32_5 C33_5 1.524(10) . ?
Zr1_6 O1_6 1.996(5) . ?
Zr1_6 C11_6 2.280(8) . ?
Zr1_6 C5_6 2.502(10) . ?
Zr1_6 C9_6 2.505(9) . ?
Zr1_6 C3_6 2.507(9) . ?
Zr1_6 C4_6 2.509(11) . ?
Zr1_6 C2_6 2.514(8) . ?
Zr1_6 C7_6 2.516(8) . ?
Zr1_6 C1_6 2.521(9) . ?
Zr1_6 C8_6 2.527(8) . ?
Zr1_6 C10_6 2.525(9) . ?
Zr1_6 C6_6 2.537(9) . ?
Si1_6 O4_6 1.604(5) . ?
Si1_6 O2_6 1.617(5) . ?
Si1_6 O6_6 1.621(5) . ?
Si1_6 O5_6 1.622(5) . ?
Si2_6 O3_6 1.593(5) . ?
Si2_6 O9_6 1.602(6) . ?
Si2_6 O7_6 1.606(5) . ?
Si2_6 O8_6 1.607(5) . ?
O1_6 B1_6 1.330(9) . ?
O2_6 B1_6 1.355(9) . ?
O3_6 B1_6 1.384(8) . ?
O4_6 C12_6 1.467(8) . ?
O5_6 C16_6 1.473(8) . ?
O6_6 C20_6 1.445(9) . ?
O7_6 C24_6 1.432(9) . ?
O8_6 C28_6 1.448(9) . ?
O9_6 C32_6 1.463(9) . ?
C1_6 C5_6 1.332(15) . ?
C1_6 C2_6 1.382(12) . ?
C2_6 C3_6 1.367(13) . ?
C3_6 C4_6 1.373(16) . ?
C4_6 C5_6 1.320(15) . ?
C6_6 C7_6 1.379(13) . ?
C6_6 C10_6 1.380(14) . ?
C7_6 C8_6 1.398(12) . ?
C8_6 C9_6 1.410(13) . ?
C9_6 C10_6 1.413(14) . ?
C12_6 C13_6 1.472(10) . ?
C12_6 C14_6 1.488(11) . ?
C12_6 C15_6 1.520(10) . ?
C16_6 C19A_6 1.442(18) . ?
C16_6 C17_6 1.465(13) . ?
C16_6 C18_6 1.487(12) . ?
C16_6 C19B_6 1.602(18) . ?
C20_6 C23_6 1.488(10) . ?
C20_6 C21_6 1.519(11) . ?
C20_6 C22_6 1.539(10) . ?
C24_6 C25_6 1.510(11) . ?
C24_6 C27_6 1.520(12) . ?
C24_6 C26_6 1.529(10) . ?
C28_6 C29_6 1.455(12) . ?
C28_6 C30_6 1.509(9) . ?
C28_6 C31_6 1.521(11) . ?
C32_6 C35_6 1.492(12) . ?
C32_6 C33_6 1.513(11) . ?
C32_6 C34_6 1.554(10) . ?
Zr1_7 O1_7 1.999(5) . ?
Zr1_7 C11_7 2.273(7) . ?
Zr1_7 C1_7 2.510(8) . ?
Zr1_7 C5_7 2.513(8) . ?
Zr1_7 C8_7 2.513(7) . ?
Zr1_7 C9_7 2.517(8) . ?
Zr1_7 C7_7 2.523(7) . ?
Zr1_7 C4_7 2.530(7) . ?
Zr1_7 C3_7 2.535(7) . ?
Zr1_7 C2_7 2.535(8) . ?
Zr1_7 C6_7 2.542(8) . ?
Zr1_7 C10_7 2.565(9) . ?
Si1_7 O5_7 1.607(5) . ?
Si1_7 O4_7 1.616(5) . ?
Si1_7 O2_7 1.619(5) . ?
Si1_7 O6_7 1.620(5) . ?
Si2_7 O3_7 1.577(5) . ?
Si2_7 O8_7 1.594(5) . ?
Si2_7 O9_7 1.611(5) . ?
Si2_7 O7_7 1.621(5) . ?
O1_7 B1_7 1.328(9) . ?
O2_7 B1_7 1.343(9) . ?
O3_7 B1_7 1.392(9) . ?
O4_7 C12_7 1.454(8) . ?
O5_7 C16_7 1.460(8) . ?
O6_7 C20_7 1.442(8) . ?
O7_7 C24_7 1.430(9) . ?
O8_7 C28_7 1.438(8) . ?
O9_7 C32_7 1.438(8) . ?
C1_7 C2_7 1.384(10) . ?
C1_7 C5_7 1.408(10) . ?
C2_7 C3_7 1.386(10) . ?
C3_7 C4_7 1.410(10) . ?
C4_7 C5_7 1.391(10) . ?
C6_7 C7_7 1.385(12) . ?
C6_7 C10_7 1.394(14) . ?
C7_7 C8_7 1.412(11) . ?
C8_7 C9_7 1.369(11) . ?
C9_7 C10_7 1.394(13) . ?
C12_7 C15_7 1.500(11) . ?
C12_7 C14_7 1.503(10) . ?
C12_7 C13_7 1.505(10) . ?
C16_7 C19_7 1.514(9) . ?
C16_7 C17_7 1.522(9) . ?
C16_7 C18_7 1.524(10) . ?
C20_7 C23_7 1.500(10) . ?
C20_7 C21_7 1.512(10) . ?
C20_7 C22_7 1.517(10) . ?
C24_7 C25_7 1.493(10) . ?
C24_7 C26_7 1.528(10) . ?
C24_7 C27_7 1.541(11) . ?
C28_7 C31_7 1.499(10) . ?
C28_7 C30_7 1.520(10) . ?
C28_7 C29_7 1.530(9) . ?
C32_7 C34_7 1.482(12) . ?
C32_7 C33_7 1.509(11) . ?
C32_7 C35_7 1.550(10) . ?
Zr1_8 O1_8 1.972(5) . ?
Zr1_8 C11_8 2.280(7) . ?
Zr1_8 C8_8 2.488(8) . ?
Zr1_8 C1_8 2.501(8) . ?
Zr1_8 C7_8 2.504(8) . ?
Zr1_8 C5_8 2.508(7) . ?
Zr1_8 C6_8 2.509(9) . ?
Zr1_8 C10_8 2.512(10) . ?
Zr1_8 C9_8 2.522(9) . ?
Zr1_8 C2_8 2.530(7) . ?
Zr1_8 C3_8 2.534(7) . ?
Zr1_8 C4_8 2.544(8) . ?
Si1_8 O4_8 1.582(5) . ?
Si1_8 O2_8 1.584(5) . ?
Si1_8 O6_8 1.607(6) . ?
Si1_8 O5_8 1.621(5) . ?
Si2_8 O3_8 1.611(5) . ?
Si2_8 O8_8 1.613(5) . ?
Si2_8 O9_8 1.615(5) . ?
Si2_8 O7_8 1.621(4) . ?
O1_8 B1_8 1.323(8) . ?
O2_8 B1_8 1.389(8) . ?
O3_8 B1_8 1.359(8) . ?
O4_8 C12_8 1.468(8) . ?
O5_8 C16_8 1.440(7) . ?
O6_8 C20_8 1.479(8) . ?
O7_8 C24_8 1.444(7) . ?
O8_8 C28_8 1.468(8) . ?
O9_8 C32_8 1.437(8) . ?
C1_8 C5_8 1.361(12) . ?
C1_8 C2_8 1.367(12) . ?
C2_8 C3_8 1.391(13) . ?
C3_8 C4_8 1.379(13) . ?
C4_8 C5_8 1.345(12) . ?
C6_8 C10_8 1.293(15) . ?
C6_8 C7_8 1.320(13) . ?
C7_8 C8_8 1.358(14) . ?
C8_8 C9_8 1.406(15) . ?
C9_8 C10_8 1.408(17) . ?
C12_8 C14_8 1.459(10) . ?
C12_8 C13_8 1.493(10) . ?
C12_8 C15_8 1.559(9) . ?
C16_8 C19_8 1.490(10) . ?
C16_8 C17_8 1.499(10) . ?
C16_8 C18_8 1.518(10) . ?
C20_8 C21_8 1.505(10) . ?
C20_8 C22_8 1.519(10) . ?
C20_8 C23_8 1.542(11) . ?
C24_8 C25_8 1.507(9) . ?
C24_8 C26_8 1.515(9) . ?
C24_8 C27_8 1.527(9) . ?
C28_8 C29_8 1.510(10) . ?
C28_8 C30_8 1.520(10) . ?
C28_8 C31_8 1.536(10) . ?
C32_8 C34_8 1.520(9) . ?
C32_8 C33_8 1.530(9) . ?
C32_8 C35_8 1.534(10) . ?
Zr1_9 O1_9 1.960(5) . ?
Zr1_9 C11_9 2.297(7) . ?
Zr1_9 C1_9 2.491(8) . ?
Zr1_9 C2_9 2.515(9) . ?
Zr1_9 C7_9 2.518(7) . ?
Zr1_9 C8_9 2.523(7) . ?
Zr1_9 C5_9 2.532(8) . ?
Zr1_9 C4_9 2.532(9) . ?
Zr1_9 C3_9 2.533(10) . ?
Zr1_9 C9_9 2.533(7) . ?
Zr1_9 C10_9 2.545(8) . ?
Zr1_9 C6_9 2.547(7) . ?
Si1_9 O4B_9 1.474(13) . ?
Si1_9 O6A_9 1.514(10) . ?
Si1_9 O6B_9 1.598(13) . ?
Si1_9 O2_9 1.603(6) . ?
Si1_9 O5A_9 1.647(10) . ?
Si1_9 O5B_9 1.657(10) . ?
Si1_9 O4A_9 1.673(10) . ?
Si2_9 O3_9 1.606(5) . ?
Si2_9 O8_9 1.613(5) . ?
Si2_9 O9_9 1.618(5) . ?
Si2_9 O7_9 1.621(6) . ?
O1_9 B1_9 1.313(9) . ?
O2_9 B1_9 1.336(10) . ?
O3_9 B1_9 1.374(9) . ?
O4A_9 C12_9 1.378(12) . ?
O5A_9 C16_9 1.613(15) . ?
O6A_9 C20_9 1.497(15) . ?
O4B_9 C12_9 1.565(15) . ?
O5B_9 C16_9 1.510(14) . ?
O6B_9 C20_9 1.443(15) . ?
O7_9 C24_9 1.409(10) . ?
O8_9 C28_9 1.447(9) . ?
O9_9 C32_9 1.440(9) . ?
C1_9 C2_9 1.360(12) . ?
C1_9 C5_9 1.365(11) . ?
C2_9 C3_9 1.376(15) . ?
C3_9 C4_9 1.398(15) . ?
C4_9 C5_9 1.375(12) . ?
C6_9 C7_9 1.380(11) . ?
C6_9 C10_9 1.403(10) . ?
C7_9 C8_9 1.416(10) . ?
C8_9 C9_9 1.388(10) . ?
C9_9 C10_9 1.397(10) . ?
C12_9 C14B_9 1.39(2) . ?
C12_9 C14A_9 1.48(2) . ?
C12_9 C13A_9 1.49(3) . ?
C12_9 C15A_9 1.51(2) . ?
C12_9 C15B_9 1.54(3) . ?
C16_9 C19_9 1.461(17) . ?
C16_9 C18_9 1.497(18) . ?
C16_9 C17B_9 1.54(2) . ?
C16_9 C17A_9 1.59(2) . ?
C20_9 C23A_9 1.26(4) . ?
C20_9 C23B_9 1.42(2) . ?
C20_9 C22B_9 1.531(19) . ?
C20_9 C22A_9 1.54(3) . ?
C20_9 C21A_9 1.56(4) . ?
C20_9 C21B_9 1.640(19) . ?
C24_9 C27_9 1.466(12) . ?
C24_9 C25_9 1.476(13) . ?
C24_9 C26_9 1.578(12) . ?
C28_9 C29_9 1.517(12) . ?
C28_9 C31_9 1.518(13) . ?
C28_9 C30_9 1.523(12) . ?
C32_9 C35_9 1.515(12) . ?
C32_9 C33_9 1.513(11) . ?
C32_9 C34_9 1.533(10) . ?
Zr1_10 O1_10 1.975(4) . ?
Zr1_10 C11_10 2.294(8) . ?
Zr1_10 C2_10 2.479(9) . ?
Zr1_10 C1_10 2.506(9) . ?
Zr1_10 C8_10 2.511(8) . ?
Zr1_10 C7_10 2.512(8) . ?
Zr1_10 C9_10 2.514(8) . ?
Zr1_10 C5_10 2.517(9) . ?
Zr1_10 C6_10 2.530(8) . ?
Zr1_10 C10_10 2.545(9) . ?
Zr1_10 C3_10 2.551(9) . ?
Zr1_10 C4_10 2.560(9) . ?
Si1_10 O4_10 1.609(5) . ?
Si1_10 O5_10 1.611(5) . ?
Si1_10 O6_10 1.621(5) . ?
Si1_10 O2_10 1.623(4) . ?
Si2_10 O7_10 1.607(5) . ?
Si2_10 O8_10 1.610(5) . ?
Si2_10 O9_10 1.612(5) . ?
Si2_10 O3_10 1.621(4) . ?
O1_10 B1_10 1.330(8) . ?
O2_10 B1_10 1.384(8) . ?
O3_10 B1_10 1.378(8) . ?
O4_10 C12_10 1.457(8) . ?
O5_10 C16_10 1.467(8) . ?
O6_10 C20_10 1.439(8) . ?
O7_10 C24_10 1.475(8) . ?
O8_10 C28_10 1.448(8) . ?
O9_10 C32_10 1.444(8) . ?
C1_10 C2_10 1.436(14) . ?
C1_10 C5_10 1.441(15) . ?
C2_10 C3_10 1.343(13) . ?
C3_10 C4_10 1.297(12) . ?
C4_10 C5_10 1.323(12) . ?
C6_10 C7_10 1.394(13) . ?
C6_10 C10_10 1.398(13) . ?
C7_10 C8_10 1.403(11) . ?
C8_10 C9_10 1.391(12) . ?
C9_10 C10_10 1.413(13) . ?
C12_10 C14_10 1.500(10) . ?
C12_10 C13_10 1.524(9) . ?
C12_10 C15_10 1.527(10) . ?
C16_10 C18A_10 1.30(2) . ?
C16_10 C18B_10 1.35(2) . ?
C16_10 C17B_10 1.554(17) . ?
C16_10 C19A_10 1.58(2) . ?
C16_10 C17A_10 1.630(18) . ?
C16_10 C19B_10 1.653(17) . ?
C20_10 C21_10 1.511(10) . ?
C20_10 C23_10 1.516(10) . ?
C20_10 C22_10 1.528(10) . ?
C24_10 C25_10 1.518(10) . ?
C24_10 C27_10 1.527(10) . ?
C24_10 C26_10 1.539(9) . ?
C28_10 C29_10 1.513(10) . ?
C28_10 C30_10 1.532(9) . ?
C28_10 C31_10 1.541(11) . ?
C32_10 C33_10 1.500(10) . ?
C32_10 C34_10 1.513(9) . ?
C32_10 C35_10 1.542(10) . ?
Zr1_11 O1_11 1.968(4) . ?
Zr1_11 C11_11 2.277(7) . ?
Zr1_11 C7_11 2.501(7) . ?
Zr1_11 C5_11 2.525(8) . ?
Zr1_11 C1_11 2.527(7) . ?
Zr1_11 C2_11 2.531(7) . ?
Zr1_11 C9_11 2.534(7) . ?
Zr1_11 C6_11 2.534(7) . ?
Zr1_11 C8_11 2.544(7) . ?
Zr1_11 C10_11 2.546(7) . ?
Zr1_11 C3_11 2.551(6) . ?
Zr1_11 C4_11 2.553(7) . ?
Si1_11 O4_11 1.606(5) . ?
Si1_11 O6_11 1.609(4) . ?
Si1_11 O5_11 1.623(5) . ?
Si1_11 O2_11 1.637(5) . ?
Si2_11 O7B_11 1.555(10) . ?
Si2_11 O8A_11 1.583(8) . ?
Si2_11 O9_11 1.591(5) . ?
Si2_11 O3_11 1.607(5) . ?
Si2_11 O8B_11 1.619(10) . ?
Si2_11 O7A_11 1.662(8) . ?
O1_11 B1_11 1.332(9) . ?
O2_11 B1_11 1.376(9) . ?
O3_11 B1_11 1.376(9) . ?
O4_11 C12_11 1.459(8) . ?
O5_11 C16_11 1.437(8) . ?
O6_11 C20_11 1.462(8) . ?
O7A_11 C24_11 1.433(10) . ?
O8A_11 C28_11 1.441(10) . ?
O7B_11 C24_11 1.443(12) . ?
O8B_11 C28_11 1.413(12) . ?
O9_11 C32_11 1.396(8) . ?
C1_11 C2_11 1.398(11) . ?
C1_11 C5_11 1.400(12) . ?
C2_11 C3_11 1.404(10) . ?
C3_11 C4_11 1.402(10) . ?
C4_11 C5_11 1.368(12) . ?
C6_11 C10_11 1.369(10) . ?
C6_11 C7_11 1.374(10) . ?
C7_11 C8_11 1.383(10) . ?
C8_11 C9_11 1.420(10) . ?
C9_11 C10_11 1.410(10) . ?
C12_11 C13_11 1.490(10) . ?
C12_11 C15_11 1.492(11) . ?
C12_11 C14_11 1.548(11) . ?
C16_11 C17_11 1.454(12) . ?
C16_11 C18A_11 1.477(14) . ?
C16_11 C19_11 1.497(17) . ?
C16_11 C18B_11 1.68(2) . ?
C17_11 C18B_11 1.99(3) . ?
C20_11 C22_11 1.501(10) . ?
C20_11 C23_11 1.502(10) . ?
C20_11 C21_11 1.528(10) . ?
C24_11 C27_11 1.477(12) . ?
C24_11 C25_11 1.479(11) . ?
C24_11 C26_11 1.478(10) . ?
C28_11 C31_11 1.458(11) . ?
C28_11 C29_11 1.495(11) . ?
C28_11 C30_11 1.541(10) . ?
C32_11 C34_11 1.498(9) . ?
C32_11 C33_11 1.516(9) . ?
C32_11 C35_11 1.521(9) . ?
Zr1_12 O1_12 1.977(4) . ?
Zr1_12 C11_12 2.281(8) . ?
Zr1_12 C1_12 2.514(8) . ?
Zr1_12 C2_12 2.514(8) . ?
Zr1_12 C3_12 2.518(7) . ?
Zr1_12 C4_12 2.523(8) . ?
Zr1_12 C5_12 2.522(9) . ?
Zr1_12 C8_12 2.525(7) . ?
Zr1_12 C7_12 2.530(7) . ?
Zr1_12 C6_12 2.535(8) . ?
Zr1_12 C9_12 2.540(7) . ?
Zr1_12 C10_12 2.566(7) . ?
Si1_12 O4_12 1.604(5) . ?
Si1_12 O6_12 1.619(5) . ?
Si1_12 O5_12 1.620(5) . ?
Si1_12 O2_12 1.627(5) . ?
Si2_12 O9_12 1.614(5) . ?
Si2_12 O7_12 1.618(5) . ?
Si2_12 O3_12 1.620(5) . ?
Si2_12 O8_12 1.622(5) . ?
O1_12 B1_12 1.345(9) . ?
O2_12 B1_12 1.359(9) . ?
O3_12 B1_12 1.382(9) . ?
O4_12 C12_12 1.449(8) . ?
O5_12 C16_12 1.446(8) . ?
O6_12 C20_12 1.448(8) . ?
O7_12 C24_12 1.466(8) . ?
O8_12 C28_12 1.441(8) . ?
O9_12 C32_12 1.432(8) . ?
C1_12 C2_12 1.392(12) . ?
C1_12 C5_12 1.403(13) . ?
C2_12 C3_12 1.398(11) . ?
C3_12 C4_12 1.375(11) . ?
C4_12 C5_12 1.368(13) . ?
C6_12 C10_12 1.393(11) . ?
C6_12 C7_12 1.406(11) . ?
C7_12 C8_12 1.402(10) . ?
C8_12 C9_12 1.406(10) . ?
C9_12 C10_12 1.403(10) . ?
C12_12 C15_12 1.492(11) . ?
C12_12 C13_12 1.537(11) . ?
C12_12 C14_12 1.546(10) . ?
C16_12 C19_12 1.409(13) . ?
C16_12 C18_12 1.482(11) . ?
C16_12 C17_12 1.505(13) . ?
C20_12 C22A_12 1.395(18) . ?
C20_12 C22B_12 1.47(2) . ?
C20_12 C21B_12 1.479(18) . ?
C20_12 C21A_12 1.528(18) . ?
C20_12 C23B_12 1.553(18) . ?
C20_12 C23A_12 1.567(16) . ?
C24_12 C26_12 1.494(10) . ?
C24_12 C25_12 1.521(10) . ?
C24_12 C27_12 1.533(10) . ?
C28_12 C31_12 1.477(10) . ?
C28_12 C30_12 1.506(11) . ?
C28_12 C29_12 1.556(10) . ?
C32_12 C33_12 1.501(9) . ?
C32_12 C34_12 1.520(9) . ?
C32_12 C35_12 1.540(9) . ?
Zr1_13 O1_13 1.966(5) . ?
Zr1_13 C11_13 2.271(8) . ?
Zr1_13 C7_13 2.485(9) . ?
Zr1_13 C9_13 2.496(10) . ?
Zr1_13 C1_13 2.498(9) . ?
Zr1_13 C8_13 2.514(10) . ?
Zr1_13 C4_13 2.512(11) . ?
Zr1_13 C3_13 2.518(10) . ?
Zr1_13 C2_13 2.517(9) . ?
Zr1_13 C6_13 2.518(9) . ?
Zr1_13 C10_13 2.524(10) . ?
Zr1_13 C5_13 2.553(10) . ?
Si1_13 O2_13 1.534(7) . ?
Si1_13 O6_13 1.566(7) . ?
Si1_13 O5B_13 1.567(17) . ?
Si1_13 O4_13 1.624(7) . ?
Si1_13 O5A_13 1.698(15) . ?
Si2_13 O7B_13 1.492(19) . ?
Si2_13 O3_13 1.574(6) . ?
Si2_13 O8A_13 1.599(10) . ?
Si2_13 O9B_13 1.604(17) . ?
Si2_13 O7A_13 1.638(12) . ?
Si2_13 O9A_13 1.650(10) . ?
Si2_13 O8B_13 1.661(19) . ?
O1_13 B1_13 1.296(11) . ?
O2_13 B1_13 1.350(11) . ?
O3_13 B1_13 1.379(11) . ?
O4_13 C12_13 1.399(9) . ?
O5A_13 C16_13 1.489(16) . ?
O5B_13 C16_13 1.534(19) . ?
O6_13 C20_13 1.442(12) . ?
O7A_13 C24_13 1.559(15) . ?
O8A_13 C28_13 1.498(14) . ?
O9A_13 C32_13 1.447(12) . ?
O7B_13 C24_13 1.55(2) . ?
O8B_13 C28_13 1.407(19) . ?
O9B_13 C32_13 1.434(18) . ?
C1_13 C2_13 1.368(13) . ?
C1_13 C5_13 1.403(13) . ?
C2_13 C3_13 1.428(15) . ?
C3_13 C4_13 1.413(17) . ?
C4_13 C5_13 1.326(15) . ?
C6_13 C10_13 1.315(13) . ?
C6_13 C7_13 1.340(12) . ?
C7_13 C8_13 1.347(13) . ?
C8_13 C9_13 1.409(16) . ?
C9_13 C10_13 1.397(16) . ?
C12_13 C14_13 1.492(10) . ?
C12_13 C13_13 1.512(12) . ?
C12_13 C15_13 1.513(11) . ?
C16_13 C19_13 1.402(15) . ?
C16_13 C17_13 1.491(14) . ?
C16_13 C18_13 1.515(16) . ?
C20_13 C22_13 1.459(15) . ?
C20_13 C23_13 1.478(17) . ?
C20_13 C21_13 1.488(16) . ?
C24_13 C25_13 1.377(15) . ?
C24_13 C27_13 1.479(13) . ?
C24_13 C26_13 1.485(12) . ?
C28_13 C30_13 1.438(14) . ?
C28_13 C29_13 1.465(15) . ?
C28_13 C31_13 1.526(13) . ?
C32_13 C33_13 1.507(13) . ?
C32_13 C34_13 1.509(11) . ?
C32_13 C35_13 1.524(12) . ?
Zr1_14 O1_14 1.974(4) . ?
Zr1_14 C11_14 2.275(8) . ?
Zr1_14 C1_14 2.493(8) . ?
Zr1_14 C2_14 2.502(9) . ?
Zr1_14 C9_14 2.508(9) . ?
Zr1_14 C7_14 2.509(7) . ?
Zr1_14 C8_14 2.525(8) . ?
Zr1_14 C3_14 2.527(9) . ?
Zr1_14 C5_14 2.528(8) . ?
Zr1_14 C10_14 2.533(8) . ?
Zr1_14 C6_14 2.534(7) . ?
Zr1_14 C4_14 2.556(9) . ?
Si1_14 O6_14 1.607(5) . ?
Si1_14 O4_14 1.616(5) . ?
Si1_14 O2_14 1.622(5) . ?
Si1_14 O5_14 1.629(5) . ?
Si2_14 O7_14 1.594(6) . ?
Si2_14 O9_14 1.604(5) . ?
Si2_14 O8_14 1.616(5) . ?
Si2_14 O3_14 1.621(4) . ?
O1_14 B1_14 1.335(9) . ?
O2_14 B1_14 1.338(9) . ?
O3_14 B1_14 1.392(9) . ?
O4_14 C12_14 1.455(10) . ?
O5_14 C16_14 1.460(8) . ?
O6_14 C20_14 1.429(9) . ?
O7_14 C24_14 1.451(10) . ?
O8_14 C28_14 1.449(8) . ?
O9_14 C32_14 1.426(10) . ?
C1_14 C2_14 1.388(11) . ?
C1_14 C5_14 1.394(11) . ?
C2_14 C3_14 1.385(11) . ?
C3_14 C4_14 1.412(11) . ?
C4_14 C5_14 1.383(11) . ?
C6_14 C7_14 1.388(10) . ?
C6_14 C10_14 1.388(10) . ?
C7_14 C8_14 1.400(10) . ?
C8_14 C9_14 1.392(11) . ?
C9_14 C10_14 1.395(11) . ?
C12_14 C14_14 1.510(13) . ?
C12_14 C13_14 1.526(12) . ?
C12_14 C15_14 1.529(13) . ?
C16_14 C19_14 1.491(10) . ?
C16_14 C17_14 1.517(11) . ?
C16_14 C18_14 1.528(11) . ?
C20_14 C21A_14 1.47(2) . ?
C20_14 C23_14 1.472(13) . ?
C20_14 C22_14 1.513(12) . ?
C20_14 C21B_14 1.538(18) . ?
C24_14 C25_14 1.492(12) . ?
C24_14 C27_14 1.506(11) . ?
C24_14 C26_14 1.527(12) . ?
C28_14 C30_14 1.481(12) . ?
C28_14 C29_14 1.500(13) . ?
C28_14 C31_14 1.514(13) . ?
C32_14 C35_14 1.507(12) . ?
C32_14 C33_14 1.531(12) . ?
C32_14 C34_14 1.547(11) . ?
Zr1_15 O1_15 1.984(5) . ?
Zr1_15 C11_15 2.250(8) . ?
Zr1_15 C8_15 2.486(9) . ?
Zr1_15 C2_15 2.506(7) . ?
Zr1_15 C4_15 2.511(8) . ?
Zr1_15 C9_15 2.513(9) . ?
Zr1_15 C5_15 2.519(8) . ?
Zr1_15 C6_15 2.521(9) . ?
Zr1_15 C1_15 2.521(8) . ?
Zr1_15 C7_15 2.527(9) . ?
Zr1_15 C3_15 2.530(8) . ?
Zr1_15 C10_15 2.538(9) . ?
Si1_15 O4_15 1.600(5) . ?
Si1_15 O2_15 1.602(5) . ?
Si1_15 O6_15 1.615(5) . ?
Si1_15 O5_15 1.621(5) . ?
Si2_15 O7B_15 1.547(10) . ?
Si2_15 O9_15 1.553(6) . ?
Si2_15 O3_15 1.587(5) . ?
Si2_15 O8A_15 1.628(9) . ?
Si2_15 O8B_15 1.643(10) . ?
Si2_15 O7A_15 1.676(9) . ?
O1_15 B1_15 1.344(9) . ?
O2_15 B1_15 1.357(9) . ?
O3_15 B1_15 1.385(9) . ?
O4_15 C12_15 1.454(7) . ?
O5_15 C16_15 1.460(8) . ?
O6_15 C20_15 1.425(8) . ?
O7A_15 C24_15 1.449(11) . ?
O8A_15 C28_15 1.550(13) . ?
O7B_15 C24_15 1.545(12) . ?
O8B_15 C28_15 1.501(13) . ?
O9_15 C32_15 1.424(10) . ?
C1_15 C2_15 1.390(10) . ?
C1_15 C5_15 1.410(11) . ?
C2_15 C3_15 1.407(11) . ?
C3_15 C4_15 1.387(11) . ?
C4_15 C5_15 1.389(11) . ?
C6_15 C7_15 1.359(14) . ?
C6_15 C10_15 1.372(15) . ?
C7_15 C8_15 1.355(15) . ?
C8_15 C9_15 1.429(15) . ?
C9_15 C10_15 1.425(15) . ?
C12_15 C14_15 1.521(9) . ?
C12_15 C15_15 1.524(10) . ?
C12_15 C13_15 1.528(9) . ?
C16_15 C18_15 1.490(10) . ?
C16_15 C17_15 1.514(10) . ?
C16_15 C19_15 1.531(10) . ?
C20_15 C21_15 1.508(11) . ?
C20_15 C23_15 1.511(9) . ?
C20_15 C22_15 1.520(11) . ?
C24_15 C27_15 1.476(13) . ?
C24_15 C25_15 1.480(11) . ?
C24_15 C26_15 1.506(10) . ?
C28_15 C29_15 1.446(14) . ?
C28_15 C30_15 1.506(13) . ?
C28_15 C31_15 1.526(12) . ?
C32_15 C35_15 1.469(13) . ?
C32_15 C33_15 1.542(12) . ?
C32_15 C34_15 1.547(11) . ?
Zr1_16 O1_16 1.974(4) . ?
Zr1_16 C11_16 2.278(8) . ?
Zr1_16 C1_16 2.488(11) . ?
Zr1_16 C5_16 2.504(11) . ?
Zr1_16 C2_16 2.519(9) . ?
Zr1_16 C9_16 2.521(7) . ?
Zr1_16 C8_16 2.526(7) . ?
Zr1_16 C7_16 2.525(7) . ?
Zr1_16 C4_16 2.535(10) . ?
Zr1_16 C6_16 2.543(8) . ?
Zr1_16 C10_16 2.546(7) . ?
Zr1_16 C3_16 2.555(8) . ?
Si1_16 O5_16 1.611(5) . ?
Si1_16 O4_16 1.614(5) . ?
Si1_16 O6_16 1.627(4) . ?
Si1_16 O2_16 1.634(4) . ?
Si2_16 O7B_16 1.53(2) . ?
Si2_16 O8B_16 1.58(2) . ?
Si2_16 O3_16 1.603(5) . ?
Si2_16 O9_16 1.605(5) . ?
Si2_16 O8A_16 1.614(6) . ?
Si2_16 O7A_16 1.617(6) . ?
O1_16 B1_16 1.345(9) . ?
O2_16 B1_16 1.375(9) . ?
O3_16 B1_16 1.368(9) . ?
O4_16 C12_16 1.452(8) . ?
O5_16 C16_16 1.468(8) . ?
O6_16 C20_16 1.461(7) . ?
O7A_16 C24_16 1.470(9) . ?
O8A_16 C28_16 1.482(10) . ?
O7B_16 C24_16 1.63(2) . ?
O8B_16 C28_16 1.62(2) . ?
O9_16 C32_16 1.433(9) . ?
C1_16 C2_16 1.337(13) . ?
C1_16 C5_16 1.391(18) . ?
C2_16 C3_16 1.371(12) . ?
C3_16 C4_16 1.342(14) . ?
C4_16 C5_16 1.430(18) . ?
C6_16 C7_16 1.392(11) . ?
C6_16 C10_16 1.401(11) . ?
C7_16 C8_16 1.397(10) . ?
C8_16 C9_16 1.389(10) . ?
C9_16 C10_16 1.397(10) . ?
C12_16 C13_16 1.523(10) . ?
C12_16 C14_16 1.526(10) . ?
C12_16 C15_16 1.532(10) . ?
C16_16 C18_16 1.483(11) . ?
C16_16 C19_16 1.509(10) . ?
C16_16 C17_16 1.547(10) . ?
C20_16 C23_16 1.492(10) . ?
C20_16 C22_16 1.511(9) . ?
C20_16 C21_16 1.540(9) . ?
C24_16 C27_16 1.509(12) . ?
C24_16 C25_16 1.510(11) . ?
C24_16 C26_16 1.534(11) . ?
C28_16 C29_16 1.490(14) . ?
C28_16 C30_16 1.503(11) . ?
C28_16 C31_16 1.507(12) . ?
C32_16 C35_16 1.498(11) . ?
C32_16 C33_16 1.507(12) . ?
C32_16 C34_16 1.524(10) . ?
Zr1_17 O1_17 1.995(4) . ?
Zr1_17 C11_17 2.290(6) . ?
Zr1_17 C1_17 2.481(7) . ?
Zr1_17 C2_17 2.504(8) . ?
Zr1_17 C7_17 2.508(7) . ?
Zr1_17 C6_17 2.508(7) . ?
Zr1_17 C5_17 2.521(7) . ?
Zr1_17 C8_17 2.531(7) . ?
Zr1_17 C3_17 2.534(7) . ?
Zr1_17 C10_17 2.536(7) . ?
Zr1_17 C4_17 2.542(7) . ?
Zr1_17 C9_17 2.560(8) . ?
Si1_17 O2_17 1.606(5) . ?
Si1_17 O6_17 1.607(5) . ?
Si1_17 O4_17 1.614(5) . ?
Si1_17 O5_17 1.627(4) . ?
Si2_17 O9B_17 1.437(14) . ?
Si2_17 O7A_17 1.471(11) . ?
Si2_17 O8_17 1.571(6) . ?
Si2_17 O3_17 1.582(5) . ?
Si2_17 O9A_17 1.792(10) . ?
Si2_17 O7B_17 1.813(14) . ?
O1_17 B1_17 1.332(9) . ?
O2_17 B1_17 1.378(9) . ?
O3_17 B1_17 1.359(8) . ?
O4_17 C12_17 1.457(7) . ?
O5_17 C16_17 1.435(8) . ?
O6_17 C20_17 1.479(8) . ?
O7A_17 C24_17 1.634(15) . ?
O7B_17 C24_17 1.269(14) . ?
O8_17 C28_17 1.398(10) . ?
O9A_17 C32_17 1.475(13) . ?
O9B_17 C32_17 1.467(16) . ?
C1_17 C2_17 1.372(11) . ?
C1_17 C5_17 1.383(11) . ?
C2_17 C3_17 1.364(10) . ?
C3_17 C4_17 1.372(10) . ?
C4_17 C5_17 1.394(10) . ?
C6_17 C7_17 1.395(10) . ?
C6_17 C10_17 1.418(10) . ?
C7_17 C8_17 1.383(10) . ?
C8_17 C9_17 1.412(11) . ?
C9_17 C10_17 1.407(10) . ?
C12_17 C15_17 1.499(10) . ?
C12_17 C14_17 1.511(10) . ?
C12_17 C13_17 1.511(10) . ?
C16_17 C18_17 1.522(10) . ?
C16_17 C17_17 1.524(9) . ?
C16_17 C19_17 1.528(9) . ?
C20_17 C22_17 1.505(10) . ?
C20_17 C23_17 1.511(9) . ?
C20_17 C21_17 1.518(9) . ?
C24_17 C25A_17 1.31(2) . ?
C24_17 C26_17 1.404(13) . ?
C24_17 C27_17 1.516(16) . ?
C24_17 C25B_17 1.67(2) . ?
C28_17 C31_17 1.435(13) . ?
C28_17 C30_17 1.475(11) . ?
C28_17 C29_17 1.504(14) . ?
C32_17 C33_17 1.515(19) . ?
C32_17 C34_17 1.532(12) . ?
C32_17 C35_17 1.537(19) . ?
Zr1_18 O1_18 1.921(6) . ?
Zr1_18 C11_18 2.281(7) . ?
Zr1_18 C6A_18 2.455(18) . ?
Zr1_18 C9A_18 2.456(17) . ?
Zr1_18 C7A_18 2.486(19) . ?
Zr1_18 C3B_18 2.505(18) . ?
Zr1_18 C1B_18 2.51(2) . ?
Zr1_18 C8A_18 2.522(7) . ?
Zr1_18 C5A_18 2.530(16) . ?
Zr1_18 C1A_18 2.538(7) . ?
Zr1_18 C8B_18 2.539(16) . ?
Zr1_18 C10A_18 2.557(9) . ?
Si1_18 O5B_18 1.398(11) . ?
Si1_18 O2_18 1.492(5) . ?
Si1_18 O4A_18 1.552(8) . ?
Si1_18 O6A_18 1.609(8) . ?
Si1_18 O4B_18 1.740(11) . ?
Si1_18 O6B_18 1.741(10) . ?
Si1_18 O5A_18 1.795(8) . ?
Si2_18 O8_18 1.560(6) . ?
Si2_18 O3_18 1.575(5) . ?
Si2_18 O9_18 1.592(5) . ?
Si2_18 O7_18 1.606(6) . ?
O1_18 B1_18 1.319(10) . ?
O2_18 B1_18 1.360(10) . ?
O3_18 B1_18 1.339(10) . ?
O4A_18 C12_18 1.564(12) . ?
O5A_18 C16_18 1.360(10) . ?
O6A_18 C20_18 1.610(11) . ?
O4B_18 C12_18 1.451(13) . ?
O5B_18 C16_18 1.716(14) . ?
O6B_18 C20_18 1.327(11) . ?
O7_18 C24_18 1.411(9) . ?
O8_18 C28_18 1.448(9) . ?
O9_18 C32_18 1.423(8) . ?
C1A_18 C2A_18 1.342(17) . ?
C1A_18 C1B_18 1.38(2) . ?
C1A_18 C5A_18 1.44(2) . ?
C1A_18 C3B_18 1.48(2) . ?
C1B_18 C5B_18 1.43(2) . ?
C1B_18 C5A_18 1.56(3) . ?
C2A_18 C3A_18 1.46(2) . ?
C2A_18 C3B_18 1.51(2) . ?
C3A_18 C3B_18 1.21(2) . ?
C3A_18 C4A_18 1.43(2) . ?
C3B_18 C4A_18 0.91(2) . ?
C3B_18 C5A_18 1.08(2) . ?
C3B_18 C4B_18 1.39(3) . ?
C4A_18 C4B_18 1.01(2) . ?
C4A_18 C5A_18 1.38(3) . ?
C4B_18 C5A_18 0.91(2) . ?
C4B_18 C5B_18 1.38(3) . ?
C5A_18 C5B_18 1.27(2) . ?
C6A_18 C6B_18 1.05(2) . ?
C6A_18 C7A_18 1.43(2) . ?
C6A_18 C10A_18 1.76(2) . ?
C6B_18 C10A_18 1.156(18) . ?
C6B_18 C9A_18 1.37(3) . ?
C6B_18 C7A_18 1.58(2) . ?
C6B_18 C8A_18 1.588(19) . ?
C7A_18 C8A_18 1.36(2) . ?
C8A_18 C8B_18 1.291(19) . ?
C8A_18 C9A_18 1.36(2) . ?
C8B_18 C9A_18 1.08(2) . ?
C8B_18 C9B_18 1.39(2) . ?
C9A_18 C9B_18 1.01(2) . ?
C9A_18 C10A_18 1.31(2) . ?
C9B_18 C10A_18 1.62(2) . ?
C12_18 C13_18 1.447(14) . ?
C12_18 C14_18 1.533(11) . ?
C12_18 C15_18 1.535(14) . ?
C16_18 C17_18 1.479(10) . ?
C16_18 C18_18 1.488(12) . ?
C16_18 C19_18 1.490(11) . ?
C20_18 C23_18 1.386(12) . ?
C20_18 C22_18 1.454(14) . ?
C20_18 C21_18 1.517(13) . ?
C24_18 C26_18 1.482(12) . ?
C24_18 C27_18 1.500(13) . ?
C24_18 C25_18 1.545(13) . ?
C28_18 C29_18 1.495(12) . ?
C28_18 C31_18 1.497(10) . ?
C28_18 C30_18 1.498(11) . ?
C32_18 C34_18 1.516(10) . ?
C32_18 C33_18 1.526(10) . ?
C32_18 C35_18 1.550(10) . ?
 
loop_
  _geom_angle_atom_site_label_1
  _geom_angle_atom_site_label_2
  _geom_angle_atom_site_label_3
  _geom_angle
  _geom_angle_site_symmetry_1
  _geom_angle_site_symmetry_3
  _geom_angle_publ_flag
O1_1 Zr1_1 C11_1 97.5(2) . . ?
O1_1 Zr1_1 C7_1 99.5(3) . . ?
C11_1 Zr1_1 C7_1 131.4(3) . . ?
O1_1 Zr1_1 C8_1 82.0(2) . . ?
C11_1 Zr1_1 C8_1 108.1(3) . . ?
C7_1 Zr1_1 C8_1 32.0(3) . . ?
O1_1 Zr1_1 C1_1 109.9(2) . . ?
C11_1 Zr1_1 C1_1 129.3(3) . . ?
C7_1 Zr1_1 C1_1 86.0(3) . . ?
C8_1 Zr1_1 C1_1 117.1(3) . . ?
O1_1 Zr1_1 C10_1 131.0(2) . . ?
C11_1 Zr1_1 C10_1 82.6(3) . . ?
C7_1 Zr1_1 C10_1 52.3(3) . . ?
C8_1 Zr1_1 C10_1 52.6(3) . . ?
C1_1 Zr1_1 C10_1 107.0(3) . . ?
O1_1 Zr1_1 C6_1 130.7(3) . . ?
C11_1 Zr1_1 C6_1 112.0(3) . . ?
C7_1 Zr1_1 C6_1 31.7(3) . . ?
C8_1 Zr1_1 C6_1 52.2(3) . . ?
C1_1 Zr1_1 C6_1 81.2(3) . . ?
C10_1 Zr1_1 C6_1 30.8(2) . . ?
O1_1 Zr1_1 C9_1 99.5(3) . . ?
C11_1 Zr1_1 C9_1 79.9(3) . . ?
C7_1 Zr1_1 C9_1 52.5(3) . . ?
C8_1 Zr1_1 C9_1 31.6(3) . . ?
C1_1 Zr1_1 C9_1 132.8(2) . . ?
C10_1 Zr1_1 C9_1 31.9(2) . . ?
C6_1 Zr1_1 C9_1 51.7(2) . . ?
O1_1 Zr1_1 C2_1 82.6(2) . . ?
C11_1 Zr1_1 C2_1 119.8(3) . . ?
C7_1 Zr1_1 C2_1 107.4(3) . . ?
C8_1 Zr1_1 C2_1 131.0(3) . . ?
C1_1 Zr1_1 C2_1 32.2(2) . . ?
C10_1 Zr1_1 C2_1 139.2(3) . . ?
C6_1 Zr1_1 C2_1 112.1(3) . . ?
C9_1 Zr1_1 C2_1 159.9(3) . . ?
O1_1 Zr1_1 C4_1 119.5(2) . . ?
C11_1 Zr1_1 C4_1 76.9(2) . . ?
C7_1 Zr1_1 C4_1 129.4(3) . . ?
C8_1 Zr1_1 C4_1 157.6(3) . . ?
C1_1 Zr1_1 C4_1 52.6(2) . . ?
C10_1 Zr1_1 C4_1 108.3(3) . . ?
C6_1 Zr1_1 C4_1 105.5(3) . . ?
C9_1 Zr1_1 C4_1 136.5(3) . . ?
C2_1 Zr1_1 C4_1 53.3(3) . . ?
O1_1 Zr1_1 C5_1 136.1(2) . . ?
C11_1 Zr1_1 C5_1 100.7(2) . . ?
C7_1 Zr1_1 C5_1 97.7(3) . . ?
C8_1 Zr1_1 C5_1 128.0(3) . . ?
C1_1 Zr1_1 C5_1 32.1(2) . . ?
C10_1 Zr1_1 C5_1 91.0(3) . . ?
C6_1 Zr1_1 C5_1 77.2(3) . . ?
C9_1 Zr1_1 C5_1 122.8(3) . . ?
C2_1 Zr1_1 C5_1 53.7(2) . . ?
C4_1 Zr1_1 C5_1 31.7(2) . . ?
O1_1 Zr1_1 C3_1 88.3(2) . . ?
C11_1 Zr1_1 C3_1 88.0(3) . . ?
C7_1 Zr1_1 C3_1 137.5(3) . . ?
C8_1 Zr1_1 C3_1 162.1(3) . . ?
C1_1 Zr1_1 C3_1 52.6(2) . . ?
C10_1 Zr1_1 C3_1 140.4(3) . . ?
C6_1 Zr1_1 C3_1 129.5(3) . . ?
C9_1 Zr1_1 C3_1 166.3(3) . . ?
C2_1 Zr1_1 C3_1 31.9(2) . . ?
C4_1 Zr1_1 C3_1 32.3(2) . . ?
C5_1 Zr1_1 C3_1 53.1(2) . . ?
O6_1 Si1_1 O4_1 108.1(3) . . ?
O6_1 Si1_1 O5_1 108.1(4) . . ?
O4_1 Si1_1 O5_1 112.1(3) . . ?
O6_1 Si1_1 O2_1 115.2(3) . . ?
O4_1 Si1_1 O2_1 109.6(2) . . ?
O5_1 Si1_1 O2_1 103.8(3) . . ?
O3_1 Si2_1 O7_1 112.3(2) . . ?
O3_1 Si2_1 O8_1 107.1(2) . . ?
O7_1 Si2_1 O8_1 107.8(2) . . ?
O3_1 Si2_1 O9_1 109.3(2) . . ?
O7_1 Si2_1 O9_1 108.7(2) . . ?
O8_1 Si2_1 O9_1 111.8(2) . . ?
B1_1 O1_1 Zr1_1 177.5(5) . . ?
B1_1 O2_1 Si1_1 142.1(5) . . ?
B1_1 O3_1 Si2_1 144.4(4) . . ?
C12_1 O4_1 Si1_1 138.1(4) . . ?
C16_1 O5_1 Si1_1 134.7(5) . . ?
C20_1 O6_1 Si1_1 137.3(5) . . ?
C24_1 O7_1 Si2_1 133.3(5) . . ?
C28_1 O8_1 Si2_1 129.6(4) . . ?
C32_1 O9_1 Si2_1 133.8(4) . . ?
C5_1 C1_1 C2_1 110.5(7) . . ?
C5_1 C1_1 Zr1_1 75.7(4) . . ?
C2_1 C1_1 Zr1_1 75.5(4) . . ?
C3_1 C2_1 C1_1 106.2(7) . . ?
C3_1 C2_1 Zr1_1 74.2(4) . . ?
C1_1 C2_1 Zr1_1 72.4(4) . . ?
C2_1 C3_1 C4_1 108.4(7) . . ?
C2_1 C3_1 Zr1_1 73.8(4) . . ?
C4_1 C3_1 Zr1_1 73.8(4) . . ?
C5_1 C4_1 C3_1 108.3(7) . . ?
C5_1 C4_1 Zr1_1 74.1(4) . . ?
C3_1 C4_1 Zr1_1 73.9(4) . . ?
C4_1 C5_1 C1_1 106.6(6) . . ?
C4_1 C5_1 Zr1_1 74.1(4) . . ?
C1_1 C5_1 Zr1_1 72.2(4) . . ?
C10_1 C6_1 C7_1 108.9(8) . . ?
C10_1 C6_1 Zr1_1 74.5(4) . . ?
C7_1 C6_1 Zr1_1 71.8(4) . . ?
C8_1 C7_1 C6_1 107.7(8) . . ?
C8_1 C7_1 Zr1_1 74.7(5) . . ?
C6_1 C7_1 Zr1_1 76.5(5) . . ?
C7_1 C8_1 C9_1 108.0(8) . . ?
C7_1 C8_1 Zr1_1 73.3(5) . . ?
C9_1 C8_1 Zr1_1 75.9(5) . . ?
C8_1 C9_1 C10_1 107.2(7) . . ?
C8_1 C9_1 Zr1_1 72.4(5) . . ?
C10_1 C9_1 Zr1_1 73.8(5) . . ?
C6_1 C10_1 C9_1 108.0(8) . . ?
C6_1 C10_1 Zr1_1 74.8(5) . . ?
C9_1 C10_1 Zr1_1 74.3(5) . . ?
O4_1 C12_1 C14_1 110.6(6) . . ?
O4_1 C12_1 C15_1 107.6(6) . . ?
C14_1 C12_1 C15_1 110.8(7) . . ?
O4_1 C12_1 C13_1 105.6(5) . . ?
C14_1 C12_1 C13_1 110.6(6) . . ?
C15_1 C12_1 C13_1 111.5(7) . . ?
O5_1 C16_1 C18_1 104.9(7) . . ?
O5_1 C16_1 C17_1 113.9(6) . . ?
C18_1 C16_1 C17_1 110.1(7) . . ?
O5_1 C16_1 C19_1 107.3(6) . . ?
C18_1 C16_1 C19_1 109.1(7) . . ?
C17_1 C16_1 C19_1 111.3(6) . . ?
O6_1 C20_1 C22_1 107.8(8) . . ?
O6_1 C20_1 C23_1 104.1(7) . . ?
C22_1 C20_1 C23_1 111.9(9) . . ?
O6_1 C20_1 C21_1 110.3(6) . . ?
C22_1 C20_1 C21_1 110.5(7) . . ?
C23_1 C20_1 C21_1 112.0(7) . . ?
O7_1 C24_1 C27_1 111.3(7) . . ?
O7_1 C24_1 C26_1 109.4(7) . . ?
C27_1 C24_1 C26_1 110.5(8) . . ?
O7_1 C24_1 C25_1 106.3(6) . . ?
C27_1 C24_1 C25_1 110.4(7) . . ?
C26_1 C24_1 C25_1 108.9(7) . . ?
O8_1 C28_1 C29_1 105.1(6) . . ?
O8_1 C28_1 C31_1 110.9(6) . . ?
C29_1 C28_1 C31_1 112.6(7) . . ?
O8_1 C28_1 C30_1 108.9(6) . . ?
C29_1 C28_1 C30_1 110.0(7) . . ?
C31_1 C28_1 C30_1 109.3(7) . . ?
O9_1 C32_1 C34_1 106.1(5) . . ?
O9_1 C32_1 C35_1 111.7(6) . . ?
C34_1 C32_1 C35_1 109.1(6) . . ?
O9_1 C32_1 C33_1 109.0(6) . . ?
C34_1 C32_1 C33_1 110.4(7) . . ?
C35_1 C32_1 C33_1 110.4(6) . . ?
O1_1 B1_1 O2_1 124.1(6) . . ?
O1_1 B1_1 O3_1 118.6(6) . . ?
O2_1 B1_1 O3_1 117.2(6) . . ?
O1_2 Zr1_2 C11_2 98.6(2) . . ?
O1_2 Zr1_2 C1_2 109.5(3) . . ?
C11_2 Zr1_2 C1_2 129.0(3) . . ?
O1_2 Zr1_2 C2_2 82.7(2) . . ?
C11_2 Zr1_2 C2_2 120.2(3) . . ?
C1_2 Zr1_2 C2_2 31.7(2) . . ?
O1_2 Zr1_2 C4_2 118.1(3) . . ?
C11_2 Zr1_2 C4_2 77.2(3) . . ?
C1_2 Zr1_2 C4_2 52.2(3) . . ?
C2_2 Zr1_2 C4_2 52.1(3) . . ?
O1_2 Zr1_2 C7_2 107.9(2) . . ?
C11_2 Zr1_2 C7_2 129.7(3) . . ?
C1_2 Zr1_2 C7_2 80.9(3) . . ?
C2_2 Zr1_2 C7_2 105.2(3) . . ?
C4_2 Zr1_2 C7_2 121.8(3) . . ?
O1_2 Zr1_2 C9_2 89.7(3) . . ?
C11_2 Zr1_2 C9_2 86.5(4) . . ?
C1_2 Zr1_2 C9_2 133.5(3) . . ?
C2_2 Zr1_2 C9_2 153.0(4) . . ?
C4_2 Zr1_2 C9_2 149.3(4) . . ?
C7_2 Zr1_2 C9_2 52.7(3) . . ?
O1_2 Zr1_2 C3_2 87.9(3) . . ?
C11_2 Zr1_2 C3_2 88.5(3) . . ?
C1_2 Zr1_2 C3_2 52.3(3) . . ?
C2_2 Zr1_2 C3_2 31.7(3) . . ?
C4_2 Zr1_2 C3_2 31.2(3) . . ?
C7_2 Zr1_2 C3_2 133.2(3) . . ?
C9_2 Zr1_2 C3_2 174.2(3) . . ?
O1_2 Zr1_2 C5_2 135.6(3) . . ?
C11_2 Zr1_2 C5_2 100.5(3) . . ?
C1_2 Zr1_2 C5_2 31.8(3) . . ?
C2_2 Zr1_2 C5_2 53.2(3) . . ?
C4_2 Zr1_2 C5_2 32.4(3) . . ?
C7_2 Zr1_2 C5_2 89.5(3) . . ?
C9_2 Zr1_2 C5_2 130.9(3) . . ?
C3_2 Zr1_2 C5_2 53.2(3) . . ?
O1_2 Zr1_2 C6_2 134.9(3) . . ?
C11_2 Zr1_2 C6_2 102.0(3) . . ?
C1_2 Zr1_2 C6_2 87.5(3) . . ?
C2_2 Zr1_2 C6_2 118.8(3) . . ?
C4_2 Zr1_2 C6_2 105.5(3) . . ?
C7_2 Zr1_2 C6_2 31.8(2) . . ?
C9_2 Zr1_2 C6_2 52.4(3) . . ?
C3_2 Zr1_2 C6_2 132.0(3) . . ?
C5_2 Zr1_2 C6_2 78.8(3) . . ?
O1_2 Zr1_2 C10_2 121.3(3) . . ?
C11_2 Zr1_2 C10_2 77.4(3) . . ?
C1_2 Zr1_2 C10_2 117.9(3) . . ?
C2_2 Zr1_2 C10_2 149.6(3) . . ?
C4_2 Zr1_2 C10_2 117.8(3) . . ?
C7_2 Zr1_2 C10_2 52.3(3) . . ?
C9_2 Zr1_2 C10_2 32.0(3) . . ?
C3_2 Zr1_2 C10_2 148.9(3) . . ?
C5_2 Zr1_2 C10_2 101.9(3) . . ?
C6_2 Zr1_2 C10_2 31.1(2) . . ?
O1_2 Zr1_2 C8_2 82.2(3) . . ?
C11_2 Zr1_2 C8_2 118.0(3) . . ?
C1_2 Zr1_2 C8_2 107.5(3) . . ?
C2_2 Zr1_2 C8_2 121.3(3) . . ?
C4_2 Zr1_2 C8_2 153.9(3) . . ?
C7_2 Zr1_2 C8_2 32.0(2) . . ?
C9_2 Zr1_2 C8_2 31.7(3) . . ?
C3_2 Zr1_2 C8_2 152.7(4) . . ?
C5_2 Zr1_2 C8_2 121.5(3) . . ?
C6_2 Zr1_2 C8_2 52.6(3) . . ?
C10_2 Zr1_2 C8_2 52.6(3) . . ?
O6_2 Si1_2 O2_2 107.9(3) . . ?
O6_2 Si1_2 O5_2 113.8(3) . . ?
O2_2 Si1_2 O5_2 108.5(3) . . ?
O6_2 Si1_2 O4_2 107.2(3) . . ?
O2_2 Si1_2 O4_2 113.0(3) . . ?
O5_2 Si1_2 O4_2 106.5(3) . . ?
O9_2 Si2_2 O8_2 108.6(3) . . ?
O9_2 Si2_2 O7_2 106.9(2) . . ?
O8_2 Si2_2 O7_2 112.9(3) . . ?
O9_2 Si2_2 O3_2 114.4(3) . . ?
O8_2 Si2_2 O3_2 105.9(2) . . ?
O7_2 Si2_2 O3_2 108.2(2) . . ?
B1_2 O1_2 Zr1_2 159.4(5) . . ?
B1_2 O2_2 Si1_2 140.6(5) . . ?
B1_2 O3_2 Si2_2 135.6(5) . . ?
C12_2 O4_2 Si1_2 132.6(5) . . ?
C16_2 O5_2 Si1_2 132.0(5) . . ?
C20_2 O6_2 Si1_2 132.1(5) . . ?
C24_2 O7_2 Si2_2 129.7(4) . . ?
C28_2 O8_2 Si2_2 131.3(4) . . ?
C32_2 O9_2 Si2_2 132.0(5) . . ?
C2_2 C1_2 C5_2 110.5(8) . . ?
C2_2 C1_2 Zr1_2 74.8(5) . . ?
C5_2 C1_2 Zr1_2 75.7(5) . . ?
C1_2 C2_2 C3_2 107.6(8) . . ?
C1_2 C2_2 Zr1_2 73.5(5) . . ?
C3_2 C2_2 Zr1_2 75.1(5) . . ?
C4_2 C3_2 C2_2 107.5(8) . . ?
C4_2 C3_2 Zr1_2 73.6(5) . . ?
C2_2 C3_2 Zr1_2 73.2(5) . . ?
C3_2 C4_2 C5_2 110.1(9) . . ?
C3_2 C4_2 Zr1_2 75.2(5) . . ?
C5_2 C4_2 Zr1_2 74.6(5) . . ?
C1_2 C5_2 C4_2 104.2(8) . . ?
C1_2 C5_2 Zr1_2 72.4(5) . . ?
C4_2 C5_2 Zr1_2 72.9(5) . . ?
C10_2 C6_2 C7_2 108.5(8) . . ?
C10_2 C6_2 Zr1_2 74.6(5) . . ?
C7_2 C6_2 Zr1_2 73.2(4) . . ?
C6_2 C7_2 C8_2 108.1(8) . . ?
C6_2 C7_2 Zr1_2 75.0(5) . . ?
C8_2 C7_2 Zr1_2 75.0(5) . . ?
C9_2 C8_2 C7_2 107.0(9) . . ?
C9_2 C8_2 Zr1_2 73.1(5) . . ?
C7_2 C8_2 Zr1_2 72.9(5) . . ?
C8_2 C9_2 C10_2 108.4(8) . . ?
C8_2 C9_2 Zr1_2 75.2(5) . . ?
C10_2 C9_2 Zr1_2 75.0(5) . . ?
C6_2 C10_2 C9_2 107.9(9) . . ?
C6_2 C10_2 Zr1_2 74.3(5) . . ?
C9_2 C10_2 Zr1_2 73.0(5) . . ?
O4_2 C12_2 C13_2 111.6(8) . . ?
O4_2 C12_2 C14_2 109.2(8) . . ?
C13_2 C12_2 C14_2 112.0(8) . . ?
O4_2 C12_2 C15_2 104.4(7) . . ?
C13_2 C12_2 C15_2 109.5(9) . . ?
C14_2 C12_2 C15_2 109.8(8) . . ?
O5_2 C16_2 C17_2 112.2(6) . . ?
O5_2 C16_2 C19_2 107.3(7) . . ?
C17_2 C16_2 C19_2 109.3(9) . . ?
O5_2 C16_2 C18_2 103.3(7) . . ?
C17_2 C16_2 C18_2 111.9(8) . . ?
C19_2 C16_2 C18_2 112.7(8) . . ?
C21A_2 C20_2 C21B_2 127.9(17) . . ?
C21A_2 C20_2 O6_2 119.0(14) . . ?
C21B_2 C20_2 O6_2 113.1(12) . . ?
C21A_2 C20_2 C22A_2 118.2(16) . . ?
C21B_2 C20_2 C22A_2 44.2(10) . . ?
O6_2 C20_2 C22A_2 103.1(9) . . ?
C21A_2 C20_2 C22B_2 46.2(13) . . ?
C21B_2 C20_2 C22B_2 115.0(13) . . ?
O6_2 C20_2 C22B_2 110.8(8) . . ?
C22A_2 C20_2 C22B_2 145.9(10) . . ?
C21A_2 C20_2 C23B_2 54.2(14) . . ?
C21B_2 C20_2 C23B_2 110.7(12) . . ?
O6_2 C20_2 C23B_2 105.7(8) . . ?
C22A_2 C20_2 C23B_2 73.0(9) . . ?
C22B_2 C20_2 C23B_2 100.4(10) . . ?
C21A_2 C20_2 C23A_2 116.1(16) . . ?
C21B_2 C20_2 C23A_2 52.0(11) . . ?
O6_2 C20_2 C23A_2 100.9(9) . . ?
C22A_2 C20_2 C23A_2 95.8(11) . . ?
C22B_2 C20_2 C23A_2 74.8(9) . . ?
C23B_2 C20_2 C23A_2 152.8(10) . . ?
O7_2 C24_2 C25_2 107.9(6) . . ?
O7_2 C24_2 C26_2 105.0(6) . . ?
C25_2 C24_2 C26_2 110.5(7) . . ?
O7_2 C24_2 C27_2 111.5(6) . . ?
C25_2 C24_2 C27_2 111.6(7) . . ?
C26_2 C24_2 C27_2 110.2(7) . . ?
O8_2 C28_2 C31_2 109.1(6) . . ?
O8_2 C28_2 C30_2 110.8(6) . . ?
C31_2 C28_2 C30_2 110.8(7) . . ?
O8_2 C28_2 C29_2 105.4(6) . . ?
C31_2 C28_2 C29_2 111.5(7) . . ?
C30_2 C28_2 C29_2 109.1(7) . . ?
O9_2 C32_2 C35_2 109.8(6) . . ?
O9_2 C32_2 C33_2 106.1(6) . . ?
C35_2 C32_2 C33_2 110.4(7) . . ?
O9_2 C32_2 C34_2 108.8(6) . . ?
C35_2 C32_2 C34_2 110.9(7) . . ?
C33_2 C32_2 C34_2 110.7(7) . . ?
O1_2 B1_2 O2_2 121.1(7) . . ?
O1_2 B1_2 O3_2 122.9(7) . . ?
O2_2 B1_2 O3_2 116.0(6) . . ?
O1_3 Zr1_3 C11_3 99.8(3) . . ?
O1_3 Zr1_3 C8_3 84.6(4) . . ?
C11_3 Zr1_3 C8_3 92.8(4) . . ?
O1_3 Zr1_3 C7_3 85.1(4) . . ?
C11_3 Zr1_3 C7_3 125.2(4) . . ?
C8_3 Zr1_3 C7_3 32.9(3) . . ?
O1_3 Zr1_3 C1_3 108.7(6) . . ?
C11_3 Zr1_3 C1_3 127.2(5) . . ?
C8_3 Zr1_3 C1_3 132.4(7) . . ?
C7_3 Zr1_3 C1_3 101.1(7) . . ?
O1_3 Zr1_3 C5_3 135.6(7) . . ?
C11_3 Zr1_3 C5_3 96.7(7) . . ?
C8_3 Zr1_3 C5_3 135.4(8) . . ?
C7_3 Zr1_3 C5_3 117.3(8) . . ?
C1_3 Zr1_3 C5_3 33.8(6) . . ?
O1_3 Zr1_3 C3_3 85.6(6) . . ?
C11_3 Zr1_3 C3_3 89.6(4) . . ?
C8_3 Zr1_3 C3_3 170.1(6) . . ?
C7_3 Zr1_3 C3_3 145.0(5) . . ?
C1_3 Zr1_3 C3_3 51.0(8) . . ?
C5_3 Zr1_3 C3_3 53.5(8) . . ?
O1_3 Zr1_3 C2_3 81.5(5) . . ?
C11_3 Zr1_3 C2_3 121.8(5) . . ?
C8_3 Zr1_3 C2_3 144.3(5) . . ?
C7_3 Zr1_3 C2_3 112.9(5) . . ?
C1_3 Zr1_3 C2_3 30.5(6) . . ?
C5_3 Zr1_3 C2_3 54.9(8) . . ?
C3_3 Zr1_3 C2_3 32.2(5) . . ?
O1_3 Zr1_3 C10_3 134.8(4) . . ?
C11_3 Zr1_3 C10_3 95.0(4) . . ?
C8_3 Zr1_3 C10_3 52.1(5) . . ?
C7_3 Zr1_3 C10_3 52.2(5) . . ?
C1_3 Zr1_3 C10_3 94.9(8) . . ?
C5_3 Zr1_3 C10_3 83.7(8) . . ?
C3_3 Zr1_3 C10_3 137.2(7) . . ?
C2_3 Zr1_3 C10_3 124.8(7) . . ?
O1_3 Zr1_3 C6_3 113.9(4) . . ?
C11_3 Zr1_3 C6_3 125.9(4) . . ?
C8_3 Zr1_3 C6_3 52.6(4) . . ?
C7_3 Zr1_3 C6_3 31.0(4) . . ?
C1_3 Zr1_3 C6_3 81.0(8) . . ?
C5_3 Zr1_3 C6_3 87.7(8) . . ?
C3_3 Zr1_3 C6_3 132.0(6) . . ?
C2_3 Zr1_3 C6_3 104.6(6) . . ?
C10_3 Zr1_3 C6_3 31.8(4) . . ?
O1_3 Zr1_3 C4_3 115.6(7) . . ?
C11_3 Zr1_3 C4_3 76.7(5) . . ?
C8_3 Zr1_3 C4_3 158.4(7) . . ?
C7_3 Zr1_3 C4_3 148.5(7) . . ?
C1_3 Zr1_3 C4_3 51.2(7) . . ?
C5_3 Zr1_3 C4_3 31.5(7) . . ?
C3_3 Zr1_3 C4_3 31.2(6) . . ?
C2_3 Zr1_3 C4_3 52.5(6) . . ?
C10_3 Zr1_3 C4_3 109.3(8) . . ?
C6_3 Zr1_3 C4_3 119.1(8) . . ?
O1_3 Zr1_3 C9_3 114.1(4) . . ?
C11_3 Zr1_3 C9_3 75.3(4) . . ?
C8_3 Zr1_3 C9_3 32.5(3) . . ?
C7_3 Zr1_3 C9_3 54.0(4) . . ?
C1_3 Zr1_3 C9_3 126.3(8) . . ?
C5_3 Zr1_3 C9_3 109.9(8) . . ?
C3_3 Zr1_3 C9_3 156.6(6) . . ?
C2_3 Zr1_3 C9_3 155.9(7) . . ?
C10_3 Zr1_3 C9_3 31.4(4) . . ?
C6_3 Zr1_3 C9_3 53.1(4) . . ?
C4_3 Zr1_3 C9_3 125.9(7) . . ?
O4_3 Si1_3 O6_3 108.3(3) . . ?
O4_3 Si1_3 O5_3 113.8(3) . . ?
O6_3 Si1_3 O5_3 107.1(3) . . ?
O4_3 Si1_3 O2_3 109.4(3) . . ?
O6_3 Si1_3 O2_3 112.1(3) . . ?
O5_3 Si1_3 O2_3 106.2(3) . . ?
O7_3 Si2_3 O9_3 108.1(3) . . ?
O7_3 Si2_3 O3_3 113.7(3) . . ?
O9_3 Si2_3 O3_3 108.4(3) . . ?
O7_3 Si2_3 O8_3 110.3(4) . . ?
O9_3 Si2_3 O8_3 111.7(3) . . ?
O3_3 Si2_3 O8_3 104.6(3) . . ?
B1_3 O1_3 Zr1_3 173.8(5) . . ?
B1_3 O2_3 Si1_3 139.5(5) . . ?
B1_3 O3_3 Si2_3 143.9(5) . . ?
C12_3 O4_3 Si1_3 134.0(5) . . ?
C16_3 O5_3 Si1_3 131.7(5) . . ?
C20_3 O6_3 Si1_3 130.7(5) . . ?
C24_3 O7_3 Si2_3 136.3(6) . . ?
C28_3 O8_3 Si2_3 132.4(5) . . ?
C32_3 O9_3 Si2_3 133.2(5) . . ?
C2_3 C1_3 C5_3 113(3) . . ?
C2_3 C1_3 Zr1_3 75.1(11) . . ?
C5_3 C1_3 Zr1_3 73.4(9) . . ?
C1_3 C2_3 C3_3 105(2) . . ?
C1_3 C2_3 Zr1_3 74.4(11) . . ?
C3_3 C2_3 Zr1_3 73.9(8) . . ?
C4_3 C3_3 C2_3 108(2) . . ?
C4_3 C3_3 Zr1_3 75.0(8) . . ?
C2_3 C3_3 Zr1_3 73.9(7) . . ?
C3_3 C4_3 C5_3 112(2) . . ?
C3_3 C4_3 Zr1_3 73.8(8) . . ?
C5_3 C4_3 Zr1_3 73.6(10) . . ?
C4_3 C5_3 C1_3 101(3) . . ?
C4_3 C5_3 Zr1_3 75.0(12) . . ?
C1_3 C5_3 Zr1_3 72.9(9) . . ?
C7_3 C6_3 C10_3 108.3(14) . . ?
C7_3 C6_3 Zr1_3 73.5(6) . . ?
C10_3 C6_3 Zr1_3 73.9(7) . . ?
C6_3 C7_3 C8_3 107.5(13) . . ?
C6_3 C7_3 Zr1_3 75.4(7) . . ?
C8_3 C7_3 Zr1_3 73.2(5) . . ?
C9_3 C8_3 C7_3 108.3(12) . . ?
C9_3 C8_3 Zr1_3 75.1(6) . . ?
C7_3 C8_3 Zr1_3 73.9(5) . . ?
C10_3 C9_3 C8_3 105.4(12) . . ?
C10_3 C9_3 Zr1_3 74.0(7) . . ?
C8_3 C9_3 Zr1_3 72.4(5) . . ?
C9_3 C10_3 C6_3 110.5(14) . . ?
C9_3 C10_3 Zr1_3 74.6(6) . . ?
C6_3 C10_3 Zr1_3 74.3(6) . . ?
O4_3 C12_3 C13_3 111.0(7) . . ?
O4_3 C12_3 C15_3 104.9(7) . . ?
C13_3 C12_3 C15_3 113.2(8) . . ?
O4_3 C12_3 C14_3 106.5(6) . . ?
C13_3 C12_3 C14_3 109.9(8) . . ?
C15_3 C12_3 C14_3 111.0(8) . . ?
O5_3 C16_3 C18_3 105.3(6) . . ?
O5_3 C16_3 C19_3 109.7(6) . . ?
C18_3 C16_3 C19_3 111.8(7) . . ?
O5_3 C16_3 C17_3 111.0(6) . . ?
C18_3 C16_3 C17_3 109.1(7) . . ?
C19_3 C16_3 C17_3 109.8(7) . . ?
C22_3 C20_3 O6_3 112.2(7) . . ?
C22_3 C20_3 C21_3 111.4(9) . . ?
O6_3 C20_3 C21_3 105.3(8) . . ?
C22_3 C20_3 C23_3 112.0(10) . . ?
O6_3 C20_3 C23_3 107.0(7) . . ?
C21_3 C20_3 C23_3 108.6(8) . . ?
O7_3 C24_3 C26_3 106.9(6) . . ?
O7_3 C24_3 C27_3 108.6(7) . . ?
C26_3 C24_3 C27_3 111.8(8) . . ?
O7_3 C24_3 C25_3 103.8(7) . . ?
C26_3 C24_3 C25_3 112.1(7) . . ?
C27_3 C24_3 C25_3 113.0(8) . . ?
O8_3 C28_3 C31_3 106.9(7) . . ?
O8_3 C28_3 C30_3 114.2(7) . . ?
C31_3 C28_3 C30_3 111.2(8) . . ?
O8_3 C28_3 C29_3 104.8(7) . . ?
C31_3 C28_3 C29_3 108.7(8) . . ?
C30_3 C28_3 C29_3 110.6(8) . . ?
O9_3 C32_3 C33_3 110.9(7) . . ?
O9_3 C32_3 C35_3 111.2(7) . . ?
C33_3 C32_3 C35_3 109.6(8) . . ?
O9_3 C32_3 C34_3 105.0(7) . . ?
C33_3 C32_3 C34_3 110.4(7) . . ?
C35_3 C32_3 C34_3 109.5(7) . . ?
O1_3 B1_3 O3_3 119.3(7) . . ?
O1_3 B1_3 O2_3 122.2(7) . . ?
O3_3 B1_3 O2_3 118.5(7) . . ?
O1_4 Zr1_4 C11_4 97.8(2) . . ?
O1_4 Zr1_4 C2_4 87.9(4) . . ?
C11_4 Zr1_4 C2_4 125.7(4) . . ?
O1_4 Zr1_4 C1_4 118.5(6) . . ?
C11_4 Zr1_4 C1_4 123.7(5) . . ?
C2_4 Zr1_4 C1_4 32.0(4) . . ?
O1_4 Zr1_4 C5_4 133.8(3) . . ?
C11_4 Zr1_4 C5_4 92.3(6) . . ?
C2_4 Zr1_4 C5_4 51.1(5) . . ?
C1_4 Zr1_4 C5_4 31.5(5) . . ?
O1_4 Zr1_4 C8_4 84.0(2) . . ?
C11_4 Zr1_4 C8_4 121.0(3) . . ?
C2_4 Zr1_4 C8_4 113.3(4) . . ?
C1_4 Zr1_4 C8_4 105.3(4) . . ?
C5_4 Zr1_4 C8_4 127.7(6) . . ?
O1_4 Zr1_4 C9_4 86.6(2) . . ?
C11_4 Zr1_4 C9_4 89.1(3) . . ?
C2_4 Zr1_4 C9_4 145.2(4) . . ?
C1_4 Zr1_4 C9_4 131.3(3) . . ?
C5_4 Zr1_4 C9_4 138.7(4) . . ?
C8_4 Zr1_4 C9_4 31.9(3) . . ?
O1_4 Zr1_4 C3_4 84.3(3) . . ?
C11_4 Zr1_4 C3_4 96.0(4) . . ?
C2_4 Zr1_4 C3_4 30.6(3) . . ?
C1_4 Zr1_4 C3_4 51.5(4) . . ?
C5_4 Zr1_4 C3_4 49.7(3) . . ?
C8_4 Zr1_4 C3_4 142.4(5) . . ?
C9_4 Zr1_4 C3_4 170.1(4) . . ?
O1_4 Zr1_4 C7_4 112.6(2) . . ?
C11_4 Zr1_4 C7_4 127.1(3) . . ?
C2_4 Zr1_4 C7_4 98.6(5) . . ?
C1_4 Zr1_4 C7_4 78.5(3) . . ?
C5_4 Zr1_4 C7_4 95.8(5) . . ?
C8_4 Zr1_4 C7_4 32.3(2) . . ?
C9_4 Zr1_4 C7_4 52.9(3) . . ?
C3_4 Zr1_4 C7_4 127.9(3) . . ?
O1_4 Zr1_4 C4_4 109.5(5) . . ?
C11_4 Zr1_4 C4_4 77.4(3) . . ?
C2_4 Zr1_4 C4_4 50.4(3) . . ?
C1_4 Zr1_4 C4_4 51.5(4) . . ?
C5_4 Zr1_4 C4_4 30.2(4) . . ?
C8_4 Zr1_4 C4_4 156.4(4) . . ?
C9_4 Zr1_4 C4_4 160.0(5) . . ?
C3_4 Zr1_4 C4_4 29.7(3) . . ?
C7_4 Zr1_4 C4_4 125.6(5) . . ?
O1_4 Zr1_4 C6_4 136.1(2) . . ?
C11_4 Zr1_4 C6_4 97.2(3) . . ?
C2_4 Zr1_4 C6_4 115.3(5) . . ?
C1_4 Zr1_4 C6_4 85.4(5) . . ?
C5_4 Zr1_4 C6_4 86.3(4) . . ?
C8_4 Zr1_4 C6_4 53.1(3) . . ?
C9_4 Zr1_4 C6_4 52.7(3) . . ?
C3_4 Zr1_4 C6_4 134.5(3) . . ?
C7_4 Zr1_4 C6_4 32.0(2) . . ?
C4_4 Zr1_4 C6_4 114.0(6) . . ?
O1_4 Zr1_4 C10_4 117.0(3) . . ?
C11_4 Zr1_4 C10_4 74.8(3) . . ?
C2_4 Zr1_4 C10_4 147.0(5) . . ?
C1_4 Zr1_4 C10_4 116.4(5) . . ?
C5_4 Zr1_4 C10_4 109.1(4) . . ?
C8_4 Zr1_4 C10_4 53.6(3) . . ?
C9_4 Zr1_4 C10_4 32.4(2) . . ?
C3_4 Zr1_4 C10_4 157.4(4) . . ?
C7_4 Zr1_4 C10_4 53.2(3) . . ?
C4_4 Zr1_4 C10_4 128.1(5) . . ?
C6_4 Zr1_4 C10_4 31.7(3) . . ?
O4_4 Si1_4 O6_4 107.0(3) . . ?
O4_4 Si1_4 O5_4 113.5(3) . . ?
O6_4 Si1_4 O5_4 108.4(2) . . ?
O4_4 Si1_4 O2_4 109.3(2) . . ?
O6_4 Si1_4 O2_4 112.6(3) . . ?
O5_4 Si1_4 O2_4 106.2(2) . . ?
O7_4 Si2_4 O9_4 115.3(3) . . ?
O7_4 Si2_4 O8_4 107.9(3) . . ?
O9_4 Si2_4 O8_4 106.4(3) . . ?
O7_4 Si2_4 O3_4 104.5(2) . . ?
O9_4 Si2_4 O3_4 109.8(3) . . ?
O8_4 Si2_4 O3_4 113.1(3) . . ?
B1_4 O1_4 Zr1_4 146.5(4) . . ?
B1_4 O2_4 Si1_4 134.8(5) . . ?
B1_4 O3_4 Si2_4 138.7(5) . . ?
C12_4 O4_4 Si1_4 132.7(5) . . ?
C16_4 O5_4 Si1_4 132.1(5) . . ?
C20\_4 O6_4 Si1_4 129.6(4) . . ?
C24_4 O7_4 Si2_4 132.9(5) . . ?
C28_4 O8_4 Si2_4 131.6(7) . . ?
C32_4 O9_4 Si2_4 132.5(4) . . ?
C5_4 C1_4 C2_4 104.0(10) . . ?
C5_4 C1_4 Zr1_4 74.5(8) . . ?
C2_4 C1_4 Zr1_4 73.6(6) . . ?
C3_4 C2_4 C1_4 108.2(12) . . ?
C3_4 C2_4 Zr1_4 76.4(6) . . ?
C1_4 C2_4 Zr1_4 74.4(7) . . ?
C4_4 C3_4 C2_4 109.5(12) . . ?
C4_4 C3_4 Zr1_4 75.6(6) . . ?
C2_4 C3_4 Zr1_4 73.0(6) . . ?
C3_4 C4_4 C5_4 108.3(14) . . ?
C3_4 C4_4 Zr1_4 74.7(6) . . ?
C5_4 C4_4 Zr1_4 73.4(7) . . ?
C4_4 C5_4 C1_4 110.0(14) . . ?
C4_4 C5_4 Zr1_4 76.4(7) . . ?
C1_4 C5_4 Zr1_4 74.0(8) . . ?
C7_4 C6_4 C10_4 109.1(8) . . ?
C7_4 C6_4 Zr1_4 73.0(4) . . ?
C10_4 C6_4 Zr1_4 74.6(4) . . ?
C6_4 C7_4 C8_4 107.7(9) . . ?
C6_4 C7_4 Zr1_4 75.0(4) . . ?
C8_4 C7_4 Zr1_4 73.0(4) . . ?
C9_4 C8_4 C7_4 107.8(9) . . ?
C9_4 C8_4 Zr1_4 74.5(4) . . ?
C7_4 C8_4 Zr1_4 74.7(4) . . ?
C8_4 C9_4 C10_4 109.4(8) . . ?
C8_4 C9_4 Zr1_4 73.6(4) . . ?
C10_4 C9_4 Zr1_4 75.6(4) . . ?
C6_4 C10_4 C9_4 105.9(8) . . ?
C6_4 C10_4 Zr1_4 73.7(4) . . ?
C9_4 C10_4 Zr1_4 72.0(4) . . ?
O4_4 C12_4 C14_4 109.1(6) . . ?
O4_4 C12_4 C15_4 107.6(7) . . ?
C14_4 C12_4 C15_4 111.9(7) . . ?
O4_4 C12_4 C13_4 106.5(6) . . ?
C14_4 C12_4 C13_4 110.9(7) . . ?
C15_4 C12_4 C13_4 110.7(7) . . ?
O5_4 C16_4 C19_4 108.3(7) . . ?
O5_4 C16_4 C18_4 105.5(6) . . ?
C19_4 C16_4 C18_4 112.1(8) . . ?
O5_4 C16_4 C17_4 109.2(7) . . ?
C19_4 C16_4 C17_4 110.5(7) . . ?
C18_4 C16_4 C17_4 111.0(8) . . ?
O6_4 C20\_4 C23_4 105.5(6) . . ?
O6_4 C20\_4 C21_4 108.8(6) . . ?
C23_4 C20\_4 C21_4 111.8(6) . . ?
O6_4 C20\_4 C22_4 110.2(5) . . ?
C23_4 C20\_4 C22_4 110.1(7) . . ?
C21_4 C20\_4 C22_4 110.4(6) . . ?
O7_4 C24_4 C26_4 111.7(6) . . ?
O7_4 C24_4 C25_4 107.7(6) . . ?
C26_4 C24_4 C25_4 112.3(7) . . ?
O7_4 C24_4 C27_4 104.0(6) . . ?
C26_4 C24_4 C27_4 110.5(7) . . ?
C25_4 C24_4 C27_4 110.3(7) . . ?
O8_4 C28_4 C30_4 109.4(9) . . ?
O8_4 C28_4 C29_4 112.1(9) . . ?
C30_4 C28_4 C29_4 109.7(10) . . ?
O8_4 C28_4 C31_4 105.9(9) . . ?
C30_4 C28_4 C31_4 110.3(10) . . ?
C29_4 C28_4 C31_4 109.4(11) . . ?
O9_4 C32_4 C35_4 111.5(7) . . ?
O9_4 C32_4 C33_4 107.5(7) . . ?
C35_4 C32_4 C33_4 111.0(7) . . ?
O9_4 C32_4 C34_4 104.3(6) . . ?
C35_4 C32_4 C34_4 112.2(8) . . ?
C33_4 C32_4 C34_4 110.1(8) . . ?
O1_4 B1_4 O2_4 123.3(7) . . ?
O1_4 B1_4 O3_4 118.1(7) . . ?
O2_4 B1_4 O3_4 118.5(7) . . ?
O1_5 Zr1_5 C11_5 99.1(2) . . ?
O1_5 Zr1_5 C1_5 109.4(3) . . ?
C11_5 Zr1_5 C1_5 127.6(3) . . ?
O1_5 Zr1_5 C6_5 113.7(4) . . ?
C11_5 Zr1_5 C6_5 127.2(4) . . ?
C1_5 Zr1_5 C6_5 79.6(4) . . ?
O1_5 Zr1_5 C8_5 84.7(3) . . ?
C11_5 Zr1_5 C8_5 92.6(4) . . ?
C1_5 Zr1_5 C8_5 132.0(4) . . ?
C6_5 Zr1_5 C8_5 53.3(4) . . ?
O1_5 Zr1_5 C10_5 135.7(3) . . ?
C11_5 Zr1_5 C10_5 95.6(5) . . ?
C1_5 Zr1_5 C10_5 93.4(5) . . ?
C6_5 Zr1_5 C10_5 32.6(4) . . ?
C8_5 Zr1_5 C10_5 53.0(4) . . ?
O1_5 Zr1_5 C7_5 85.1(3) . . ?
C11_5 Zr1_5 C7_5 123.5(4) . . ?
C1_5 Zr1_5 C7_5 102.4(4) . . ?
C6_5 Zr1_5 C7_5 31.9(3) . . ?
C8_5 Zr1_5 C7_5 31.3(3) . . ?
C10_5 Zr1_5 C7_5 52.4(4) . . ?
O1_5 Zr1_5 C2_5 82.1(3) . . ?
C11_5 Zr1_5 C2_5 120.4(3) . . ?
C1_5 Zr1_5 C2_5 31.4(3) . . ?
C6_5 Zr1_5 C2_5 104.7(4) . . ?
C8_5 Zr1_5 C2_5 145.9(4) . . ?
C10_5 Zr1_5 C2_5 124.4(5) . . ?
C7_5 Zr1_5 C2_5 116.0(3) . . ?
O1_5 Zr1_5 C9_5 113.9(4) . . ?
C11_5 Zr1_5 C9_5 75.6(4) . . ?
C1_5 Zr1_5 C9_5 125.7(5) . . ?
C6_5 Zr1_5 C9_5 54.0(4) . . ?
C8_5 Zr1_5 C9_5 32.1(3) . . ?
C10_5 Zr1_5 C9_5 32.3(4) . . ?
C7_5 Zr1_5 C9_5 52.4(4) . . ?
C2_5 Zr1_5 C9_5 156.5(5) . . ?
O1_5 Zr1_5 C5_5 134.9(3) . . ?
C11_5 Zr1_5 C5_5 96.9(3) . . ?
C1_5 Zr1_5 C5_5 33.3(3) . . ?
C6_5 Zr1_5 C5_5 88.2(4) . . ?
C8_5 Zr1_5 C5_5 136.3(4) . . ?
C10_5 Zr1_5 C5_5 83.6(5) . . ?
C7_5 Zr1_5 C5_5 119.2(4) . . ?
C2_5 Zr1_5 C5_5 53.5(3) . . ?
C9_5 Zr1_5 C5_5 110.9(5) . . ?
O1_5 Zr1_5 C4_5 115.8(3) . . ?
C11_5 Zr1_5 C4_5 75.3(3) . . ?
C1_5 Zr1_5 C4_5 53.0(3) . . ?
C6_5 Zr1_5 C4_5 119.6(4) . . ?
C8_5 Zr1_5 C4_5 157.3(4) . . ?
C10_5 Zr1_5 C4_5 108.3(4) . . ?
C7_5 Zr1_5 C4_5 150.9(4) . . ?
C2_5 Zr1_5 C4_5 52.7(3) . . ?
C9_5 Zr1_5 C4_5 125.2(4) . . ?
C5_5 Zr1_5 C4_5 31.6(3) . . ?
O1_5 Zr1_5 C3_5 85.0(3) . . ?
C11_5 Zr1_5 C3_5 88.7(3) . . ?
C1_5 Zr1_5 C3_5 52.7(3) . . ?
C6_5 Zr1_5 C3_5 132.3(4) . . ?
C8_5 Zr1_5 C3_5 169.7(4) . . ?
C10_5 Zr1_5 C3_5 137.0(4) . . ?
C7_5 Zr1_5 C3_5 147.4(3) . . ?
C2_5 Zr1_5 C3_5 31.7(2) . . ?
C9_5 Zr1_5 C3_5 156.8(4) . . ?
C5_5 Zr1_5 C3_5 53.4(3) . . ?
C4_5 Zr1_5 C3_5 32.3(3) . . ?
O5_5 Si1_5 O6_5 107.9(2) . . ?
O5_5 Si1_5 O4_5 107.8(3) . . ?
O6_5 Si1_5 O4_5 113.2(2) . . ?
O5_5 Si1_5 O2_5 113.0(2) . . ?
O6_5 Si1_5 O2_5 108.8(2) . . ?
O4_5 Si1_5 O2_5 106.2(2) . . ?
O7_5 Si2_5 O3_5 114.0(2) . . ?
O7_5 Si2_5 O8_5 108.7(3) . . ?
O3_5 Si2_5 O8_5 105.0(2) . . ?
O7_5 Si2_5 O9_5 107.5(3) . . ?
O3_5 Si2_5 O9_5 108.5(2) . . ?
O8_5 Si2_5 O9_5 113.3(2) . . ?
B1_5 O1_5 Zr1_5 156.4(5) . . ?
B1_5 O2_5 Si1_5 134.8(4) . . ?
B1_5 O3_5 Si2_5 140.5(4) . . ?
C16_5 O4_5 Si1_5 130.9(4) . . ?
C20_5 O5_5 Si1_5 131.2(5) . . ?
C12_5 O6_5 Si1_5 134.5(4) . . ?
C24_5 O7_5 Si2_5 131.3(4) . . ?
C28_5 O8_5 Si2_5 131.4(4) . . ?
C32_5 O9_5 Si2_5 131.7(4) . . ?
C2_5 C1_5 C5_5 108.9(9) . . ?
C2_5 C1_5 Zr1_5 75.3(5) . . ?
C5_5 C1_5 Zr1_5 74.9(5) . . ?
C1_5 C2_5 C3_5 109.6(9) . . ?
C1_5 C2_5 Zr1_5 73.4(5) . . ?
C3_5 C2_5 Zr1_5 75.5(5) . . ?
C2_5 C3_5 C4_5 106.5(9) . . ?
C2_5 C3_5 Zr1_5 72.8(4) . . ?
C4_5 C3_5 Zr1_5 73.3(5) . . ?
C5_5 C4_5 C3_5 109.7(9) . . ?
C5_5 C4_5 Zr1_5 74.0(5) . . ?
C3_5 C4_5 Zr1_5 74.4(5) . . ?
C4_5 C5_5 C1_5 105.2(9) . . ?
C4_5 C5_5 Zr1_5 74.3(5) . . ?
C1_5 C5_5 Zr1_5 71.8(4) . . ?
C7_5 C6_5 C10_5 105.7(12) . . ?
C7_5 C6_5 Zr1_5 74.8(6) . . ?
C10_5 C6_5 Zr1_5 74.1(6) . . ?
C8_5 C7_5 C6_5 110.5(12) . . ?
C8_5 C7_5 Zr1_5 73.7(6) . . ?
C6_5 C7_5 Zr1_5 73.3(6) . . ?
C7_5 C8_5 C9_5 108.7(12) . . ?
C7_5 C8_5 Zr1_5 75.1(5) . . ?
C9_5 C8_5 Zr1_5 75.0(6) . . ?
C8_5 C9_5 C10_5 106.4(13) . . ?
C8_5 C9_5 Zr1_5 72.9(6) . . ?
C10_5 C9_5 Zr1_5 73.2(6) . . ?
C9_5 C10_5 C6_5 108.6(13) . . ?
C9_5 C10_5 Zr1_5 74.5(7) . . ?
C6_5 C10_5 Zr1_5 73.2(6) . . ?
O6_5 C12_5 C15_5 108.1(6) . . ?
O6_5 C12_5 C13_5 105.8(7) . . ?
C15_5 C12_5 C13_5 111.0(7) . . ?
O6_5 C12_5 C14_5 109.2(7) . . ?
C15_5 C12_5 C14_5 111.5(7) . . ?
C13_5 C12_5 C14_5 111.1(7) . . ?
O4_5 C16_5 C18_5 105.7(6) . . ?
O4_5 C16_5 C19_5 108.2(6) . . ?
C18_5 C16_5 C19_5 112.1(7) . . ?
O4_5 C16_5 C17_5 110.6(6) . . ?
C18_5 C16_5 C17_5 110.7(7) . . ?
C19_5 C16_5 C17_5 109.4(7) . . ?
C22_5 C20_5 O5_5 112.6(6) . . ?
C22_5 C20_5 C23_5 112.5(9) . . ?
O5_5 C20_5 C23_5 104.9(7) . . ?
C22_5 C20_5 C21_5 113.5(10) . . ?
O5_5 C20_5 C21_5 105.6(7) . . ?
C23_5 C20_5 C21_5 107.2(9) . . ?
O7_5 C24_5 C27_5 109.3(6) . . ?
O7_5 C24_5 C25_5 104.9(6) . . ?
C27_5 C24_5 C25_5 111.6(6) . . ?
O7_5 C24_5 C26_5 107.9(5) . . ?
C27_5 C24_5 C26_5 111.5(7) . . ?
C25_5 C24_5 C26_5 111.3(7) . . ?
O8_5 C28_5 C30_5 111.2(7) . . ?
O8_5 C28_5 C31_5 109.5(6) . . ?
C30_5 C28_5 C31_5 108.1(10) . . ?
O8_5 C28_5 C29_5 107.6(6) . . ?
C30_5 C28_5 C29_5 110.9(9) . . ?
C31_5 C28_5 C29_5 109.5(8) . . ?
O9_5 C32_5 C35_5 110.8(6) . . ?
O9_5 C32_5 C34_5 105.6(6) . . ?
C35_5 C32_5 C34_5 111.3(6) . . ?
O9_5 C32_5 C33_5 107.9(6) . . ?
C35_5 C32_5 C33_5 109.7(7) . . ?
C34_5 C32_5 C33_5 111.3(6) . . ?
O1_5 B1_5 O2_5 124.2(6) . . ?
O1_5 B1_5 O3_5 119.0(6) . . ?
O2_5 B1_5 O3_5 116.8(6) . . ?
O1_6 Zr1_6 C11_6 100.3(2) . . ?
O1_6 Zr1_6 C5_6 135.0(3) . . ?
C11_6 Zr1_6 C5_6 94.4(5) . . ?
O1_6 Zr1_6 C9_6 86.0(4) . . ?
C11_6 Zr1_6 C9_6 91.5(4) . . ?
C5_6 Zr1_6 C9_6 136.1(4) . . ?
O1_6 Zr1_6 C3_6 85.2(3) . . ?
C11_6 Zr1_6 C3_6 91.6(4) . . ?
C5_6 Zr1_6 C3_6 51.9(4) . . ?
C9_6 Zr1_6 C3_6 171.1(5) . . ?
O1_6 Zr1_6 C4_6 114.7(5) . . ?
C11_6 Zr1_6 C4_6 75.5(4) . . ?
C5_6 Zr1_6 C4_6 30.6(4) . . ?
C9_6 Zr1_6 C4_6 156.9(6) . . ?
C3_6 Zr1_6 C4_6 31.8(4) . . ?
O1_6 Zr1_6 C2_6 84.7(3) . . ?
C11_6 Zr1_6 C2_6 122.8(3) . . ?
C5_6 Zr1_6 C2_6 52.2(3) . . ?
C9_6 Zr1_6 C2_6 145.5(4) . . ?
C3_6 Zr1_6 C2_6 31.6(3) . . ?
C4_6 Zr1_6 C2_6 52.1(4) . . ?
O1_6 Zr1_6 C7_6 114.3(3) . . ?
C11_6 Zr1_6 C7_6 125.9(3) . . ?
C5_6 Zr1_6 C7_6 89.4(5) . . ?
C9_6 Zr1_6 C7_6 53.3(3) . . ?
C3_6 Zr1_6 C7_6 129.9(4) . . ?
C4_6 Zr1_6 C7_6 119.9(5) . . ?
C2_6 Zr1_6 C7_6 101.5(4) . . ?
O1_6 Zr1_6 C1_6 114.2(4) . . ?
C11_6 Zr1_6 C1_6 124.1(4) . . ?
C5_6 Zr1_6 C1_6 30.7(3) . . ?
C9_6 Zr1_6 C1_6 131.6(4) . . ?
C3_6 Zr1_6 C1_6 51.8(3) . . ?
C4_6 Zr1_6 C1_6 50.8(4) . . ?
C2_6 Zr1_6 C1_6 31.9(3) . . ?
C7_6 Zr1_6 C1_6 78.5(3) . . ?
O1_6 Zr1_6 C8_6 85.1(3) . . ?
C11_6 Zr1_6 C8_6 123.8(3) . . ?
C5_6 Zr1_6 C8_6 120.6(5) . . ?
C9_6 Zr1_6 C8_6 32.5(3) . . ?
C3_6 Zr1_6 C8_6 144.5(4) . . ?
C4_6 Zr1_6 C8_6 151.0(5) . . ?
C2_6 Zr1_6 C8_6 113.4(4) . . ?
C7_6 Zr1_6 C8_6 32.2(3) . . ?
C1_6 Zr1_6 C8_6 102.7(4) . . ?
O1_6 Zr1_6 C10_6 116.7(4) . . ?
C11_6 Zr1_6 C10_6 76.0(3) . . ?
C5_6 Zr1_6 C10_6 108.0(5) . . ?
C9_6 Zr1_6 C10_6 32.6(3) . . ?
C3_6 Zr1_6 C10_6 156.1(5) . . ?
C4_6 Zr1_6 C10_6 124.4(6) . . ?
C2_6 Zr1_6 C10_6 150.1(4) . . ?
C7_6 Zr1_6 C10_6 51.9(4) . . ?
C1_6 Zr1_6 C10_6 119.3(5) . . ?
C8_6 Zr1_6 C10_6 53.1(4) . . ?
O1_6 Zr1_6 C6_6 137.4(3) . . ?
C11_6 Zr1_6 C6_6 95.5(4) . . ?
C5_6 Zr1_6 C6_6 82.0(5) . . ?
C9_6 Zr1_6 C6_6 54.1(4) . . ?
C3_6 Zr1_6 C6_6 133.8(4) . . ?
C4_6 Zr1_6 C6_6 107.4(6) . . ?
C2_6 Zr1_6 C6_6 118.6(4) . . ?
C7_6 Zr1_6 C6_6 31.7(3) . . ?
C1_6 Zr1_6 C6_6 87.8(4) . . ?
C8_6 Zr1_6 C6_6 53.7(3) . . ?
C10_6 Zr1_6 C6_6 31.6(3) . . ?
O4_6 Si1_6 O2_6 112.9(3) . . ?
O4_6 Si1_6 O6_6 109.2(3) . . ?
O2_6 Si1_6 O6_6 108.9(3) . . ?
O4_6 Si1_6 O5_6 107.4(3) . . ?
O2_6 Si1_6 O5_6 106.1(3) . . ?
O6_6 Si1_6 O5_6 112.4(3) . . ?
O3_6 Si2_6 O9_6 113.8(3) . . ?
O3_6 Si2_6 O7_6 105.2(3) . . ?
O9_6 Si2_6 O7_6 109.4(3) . . ?
O3_6 Si2_6 O8_6 110.2(3) . . ?
O9_6 Si2_6 O8_6 106.0(3) . . ?
O7_6 Si2_6 O8_6 112.4(3) . . ?
B1_6 O1_6 Zr1_6 157.7(5) . . ?
B1_6 O2_6 Si1_6 144.0(5) . . ?
B1_6 O3_6 Si2_6 137.0(5) . . ?
C12_6 O4_6 Si1_6 134.3(5) . . ?
C16_6 O5_6 Si1_6 130.4(5) . . ?
C20_6 O6_6 Si1_6 132.2(5) . . ?
C24_6 O7_6 Si2_6 134.0(5) . . ?
C28_6 O8_6 Si2_6 135.9(5) . . ?
C32_6 O9_6 Si2_6 131.8(5) . . ?
C5_6 C1_6 C2_6 108.9(10) . . ?
C5_6 C1_6 Zr1_6 73.8(6) . . ?
C2_6 C1_6 Zr1_6 73.8(5) . . ?
C3_6 C2_6 C1_6 106.0(10) . . ?
C3_6 C2_6 Zr1_6 73.9(6) . . ?
C1_6 C2_6 Zr1_6 74.4(5) . . ?
C2_6 C3_6 C4_6 107.3(11) . . ?
C2_6 C3_6 Zr1_6 74.5(5) . . ?
C4_6 C3_6 Zr1_6 74.2(7) . . ?
C5_6 C4_6 C3_6 108.9(13) . . ?
C5_6 C4_6 Zr1_6 74.4(7) . . ?
C3_6 C4_6 Zr1_6 74.0(6) . . ?
C4_6 C5_6 C1_6 108.9(13) . . ?
C4_6 C5_6 Zr1_6 75.0(7) . . ?
C1_6 C5_6 Zr1_6 75.4(7) . . ?
C7_6 C6_6 C10_6 106.0(12) . . ?
C7_6 C6_6 Zr1_6 73.3(5) . . ?
C10_6 C6_6 Zr1_6 73.7(6) . . ?
C6_6 C7_6 C8_6 110.8(10) . . ?
C6_6 C7_6 Zr1_6 75.0(5) . . ?
C8_6 C7_6 Zr1_6 74.3(5) . . ?
C7_6 C8_6 C9_6 106.6(10) . . ?
C7_6 C8_6 Zr1_6 73.5(5) . . ?
C9_6 C8_6 Zr1_6 72.9(5) . . ?
C8_6 C9_6 C10_6 106.2(10) . . ?
C8_6 C9_6 Zr1_6 74.6(5) . . ?
C10_6 C9_6 Zr1_6 74.5(6) . . ?
C6_6 C10_6 C9_6 110.3(12) . . ?
C6_6 C10_6 Zr1_6 74.7(6) . . ?
C9_6 C10_6 Zr1_6 72.9(6) . . ?
O4_6 C12_6 C13_6 108.5(7) . . ?
O4_6 C12_6 C14_6 105.9(7) . . ?
C13_6 C12_6 C14_6 111.0(7) . . ?
O4_6 C12_6 C15_6 108.3(6) . . ?
C13_6 C12_6 C15_6 111.0(8) . . ?
C14_6 C12_6 C15_6 111.9(8) . . ?
C19A_6 C16_6 C17_6 97.1(12) . . ?
C19A_6 C16_6 O5_6 104.8(9) . . ?
C17_6 C16_6 O5_6 111.7(8) . . ?
C19A_6 C16_6 C18_6 124.9(11) . . ?
C17_6 C16_6 C18_6 109.7(10) . . ?
O5_6 C16_6 C18_6 108.0(7) . . ?
C19A_6 C16_6 C19B_6 39.4(9) . . ?
C17_6 C16_6 C19B_6 130.6(11) . . ?
O5_6 C16_6 C19B_6 103.5(9) . . ?
C18_6 C16_6 C19B_6 90.0(10) . . ?
O6_6 C20_6 C23_6 110.9(7) . . ?
O6_6 C20_6 C21_6 105.5(7) . . ?
C23_6 C20_6 C21_6 113.0(7) . . ?
O6_6 C20_6 C22_6 106.6(6) . . ?
C23_6 C20_6 C22_6 109.8(7) . . ?
C21_6 C20_6 C22_6 110.6(7) . . ?
O7_6 C24_6 C25_6 105.5(7) . . ?
O7_6 C24_6 C27_6 108.9(7) . . ?
C25_6 C24_6 C27_6 111.7(8) . . ?
O7_6 C24_6 C26_6 111.1(6) . . ?
C25_6 C24_6 C26_6 110.2(7) . . ?
C27_6 C24_6 C26_6 109.3(8) . . ?
O8_6 C28_6 C29_6 111.1(7) . . ?
O8_6 C28_6 C30_6 103.9(7) . . ?
C29_6 C28_6 C30_6 110.7(8) . . ?
O8_6 C28_6 C31_6 110.3(7) . . ?
C29_6 C28_6 C31_6 111.2(8) . . ?
C30_6 C28_6 C31_6 109.4(7) . . ?
O9_6 C32_6 C35_6 111.0(7) . . ?
O9_6 C32_6 C33_6 105.0(7) . . ?
C35_6 C32_6 C33_6 112.2(8) . . ?
O9_6 C32_6 C34_6 107.8(7) . . ?
C35_6 C32_6 C34_6 110.0(8) . . ?
C33_6 C32_6 C34_6 110.7(8) . . ?
O1_6 B1_6 O2_6 122.9(7) . . ?
O1_6 B1_6 O3_6 121.8(7) . . ?
O2_6 B1_6 O3_6 115.3(7) . . ?
O1_7 Zr1_7 C11_7 97.9(2) . . ?
O1_7 Zr1_7 C1_7 106.9(2) . . ?
C11_7 Zr1_7 C1_7 131.1(3) . . ?
O1_7 Zr1_7 C5_7 134.4(2) . . ?
C11_7 Zr1_7 C5_7 102.8(3) . . ?
C1_7 Zr1_7 C5_7 32.6(2) . . ?
O1_7 Zr1_7 C8_7 84.9(2) . . ?
C11_7 Zr1_7 C8_7 123.1(3) . . ?
C1_7 Zr1_7 C8_7 100.9(3) . . ?
C5_7 Zr1_7 C8_7 115.1(3) . . ?
O1_7 Zr1_7 C9_7 86.0(3) . . ?
C11_7 Zr1_7 C9_7 91.6(3) . . ?
C1_7 Zr1_7 C9_7 130.7(3) . . ?
C5_7 Zr1_7 C9_7 132.8(3) . . ?
C8_7 Zr1_7 C9_7 31.6(3) . . ?
O1_7 Zr1_7 C7_7 114.4(3) . . ?
C11_7 Zr1_7 C7_7 126.8(3) . . ?
C1_7 Zr1_7 C7_7 79.4(3) . . ?
C5_7 Zr1_7 C7_7 84.1(3) . . ?
C8_7 Zr1_7 C7_7 32.6(2) . . ?
C9_7 Zr1_7 C7_7 52.7(3) . . ?
O1_7 Zr1_7 C4_7 119.8(2) . . ?
C11_7 Zr1_7 C4_7 77.8(3) . . ?
C1_7 Zr1_7 C4_7 53.4(3) . . ?
C5_7 Zr1_7 C4_7 32.0(2) . . ?
C8_7 Zr1_7 C4_7 147.0(3) . . ?
C9_7 Zr1_7 C4_7 152.9(4) . . ?
C7_7 Zr1_7 C4_7 115.1(3) . . ?
O1_7 Zr1_7 C3_7 88.2(2) . . ?
C11_7 Zr1_7 C3_7 87.6(3) . . ?
C1_7 Zr1_7 C3_7 52.9(3) . . ?
C5_7 Zr1_7 C3_7 53.1(2) . . ?
C8_7 Zr1_7 C3_7 149.2(3) . . ?
C9_7 Zr1_7 C3_7 173.9(3) . . ?
C7_7 Zr1_7 C3_7 131.9(3) . . ?
C4_7 Zr1_7 C3_7 32.3(2) . . ?
O1_7 Zr1_7 C2_7 81.3(2) . . ?
C11_7 Zr1_7 C2_7 119.1(3) . . ?
C1_7 Zr1_7 C2_7 31.8(2) . . ?
C5_7 Zr1_7 C2_7 53.1(3) . . ?
C8_7 Zr1_7 C2_7 117.5(3) . . ?
C9_7 Zr1_7 C2_7 148.0(3) . . ?
C7_7 Zr1_7 C2_7 107.1(3) . . ?
C4_7 Zr1_7 C2_7 53.1(3) . . ?
C3_7 Zr1_7 C2_7 31.7(2) . . ?
O1_7 Zr1_7 C6_7 135.8(3) . . ?
C11_7 Zr1_7 C6_7 96.2(3) . . ?
C1_7 Zr1_7 C6_7 94.2(4) . . ?
C5_7 Zr1_7 C6_7 81.7(3) . . ?
C8_7 Zr1_7 C6_7 52.7(3) . . ?
C9_7 Zr1_7 C6_7 51.9(3) . . ?
C7_7 Zr1_7 C6_7 31.7(3) . . ?
C4_7 Zr1_7 C6_7 104.0(3) . . ?
C3_7 Zr1_7 C6_7 134.2(3) . . ?
C2_7 Zr1_7 C6_7 126.0(4) . . ?
O1_7 Zr1_7 C10_7 115.0(4) . . ?
C11_7 Zr1_7 C10_7 75.5(3) . . ?
C1_7 Zr1_7 C10_7 125.9(4) . . ?
C5_7 Zr1_7 C10_7 109.4(4) . . ?
C8_7 Zr1_7 C10_7 53.2(3) . . ?
C9_7 Zr1_7 C10_7 31.8(3) . . ?
C7_7 Zr1_7 C10_7 53.3(3) . . ?
C4_7 Zr1_7 C10_7 121.2(4) . . ?
C3_7 Zr1_7 C10_7 152.6(4) . . ?
C2_7 Zr1_7 C10_7 157.7(4) . . ?
C6_7 Zr1_7 C10_7 31.7(3) . . ?
O5_7 Si1_7 O4_7 113.8(3) . . ?
O5_7 Si1_7 O2_7 105.8(3) . . ?
O4_7 Si1_7 O2_7 107.8(3) . . ?
O5_7 Si1_7 O6_7 108.2(3) . . ?
O4_7 Si1_7 O6_7 106.8(3) . . ?
O2_7 Si1_7 O6_7 114.6(3) . . ?
O3_7 Si2_7 O8_7 114.5(3) . . ?
O3_7 Si2_7 O9_7 108.5(3) . . ?
O8_7 Si2_7 O9_7 108.3(3) . . ?
O3_7 Si2_7 O7_7 109.4(3) . . ?
O8_7 Si2_7 O7_7 106.3(3) . . ?
O9_7 Si2_7 O7_7 109.7(3) . . ?
B1_7 O1_7 Zr1_7 146.5(5) . . ?
B1_7 O2_7 Si1_7 142.8(5) . . ?
B1_7 O3_7 Si2_7 156.7(6) . . ?
C12_7 O4_7 Si1_7 133.6(5) . . ?
C16_7 O5_7 Si1_7 130.7(4) . . ?
C20_7 O6_7 Si1_7 131.2(4) . . ?
C24_7 O7_7 Si2_7 132.7(5) . . ?
C28_7 O8_7 Si2_7 134.3(5) . . ?
C32_7 O9_7 Si2_7 133.1(5) . . ?
C2_7 C1_7 C5_7 107.9(8) . . ?
C2_7 C1_7 Zr1_7 75.1(4) . . ?
C5_7 C1_7 Zr1_7 73.8(5) . . ?
C1_7 C2_7 C3_7 108.6(8) . . ?
C1_7 C2_7 Zr1_7 73.1(5) . . ?
C3_7 C2_7 Zr1_7 74.1(4) . . ?
C2_7 C3_7 C4_7 108.1(7) . . ?
C2_7 C3_7 Zr1_7 74.1(4) . . ?
C4_7 C3_7 Zr1_7 73.6(4) . . ?
C5_7 C4_7 C3_7 107.5(8) . . ?
C5_7 C4_7 Zr1_7 73.3(4) . . ?
C3_7 C4_7 Zr1_7 74.0(4) . . ?
C4_7 C5_7 C1_7 108.0(7) . . ?
C4_7 C5_7 Zr1_7 74.7(5) . . ?
C1_7 C5_7 Zr1_7 73.6(4) . . ?
C7_7 C6_7 C10_7 110.3(10) . . ?
C7_7 C6_7 Zr1_7 73.4(4) . . ?
C10_7 C6_7 Zr1_7 75.1(5) . . ?
C6_7 C7_7 C8_7 106.7(9) . . ?
C6_7 C7_7 Zr1_7 74.9(5) . . ?
C8_7 C7_7 Zr1_7 73.3(4) . . ?
C9_7 C8_7 C7_7 107.1(9) . . ?
C9_7 C8_7 Zr1_7 74.4(5) . . ?
C7_7 C8_7 Zr1_7 74.1(4) . . ?
C8_7 C9_7 C10_7 110.8(10) . . ?
C8_7 C9_7 Zr1_7 74.0(5) . . ?
C10_7 C9_7 Zr1_7 76.0(6) . . ?
C9_7 C10_7 C6_7 105.1(9) . . ?
C9_7 C10_7 Zr1_7 72.2(5) . . ?
C6_7 C10_7 Zr1_7 73.3(5) . . ?
O4_7 C12_7 C15_7 108.6(7) . . ?
O4_7 C12_7 C14_7 109.2(6) . . ?
C15_7 C12_7 C14_7 110.9(7) . . ?
O4_7 C12_7 C13_7 105.1(6) . . ?
C15_7 C12_7 C13_7 110.9(7) . . ?
C14_7 C12_7 C13_7 111.9(7) . . ?
O5_7 C16_7 C19_7 108.0(6) . . ?
O5_7 C16_7 C17_7 110.4(6) . . ?
C19_7 C16_7 C17_7 111.3(6) . . ?
O5_7 C16_7 C18_7 105.4(6) . . ?
C19_7 C16_7 C18_7 110.6(7) . . ?
C17_7 C16_7 C18_7 110.9(7) . . ?
O6_7 C20_7 C23_7 105.7(6) . . ?
O6_7 C20_7 C21_7 109.0(6) . . ?
C23_7 C20_7 C21_7 109.5(6) . . ?
O6_7 C20_7 C22_7 109.9(6) . . ?
C23_7 C20_7 C22_7 110.5(8) . . ?
C21_7 C20_7 C22_7 112.1(7) . . ?
O7_7 C24_7 C25_7 109.7(7) . . ?
O7_7 C24_7 C26_7 103.3(7) . . ?
C25_7 C24_7 C26_7 109.6(8) . . ?
O7_7 C24_7 C27_7 113.0(7) . . ?
C25_7 C24_7 C27_7 112.0(7) . . ?
C26_7 C24_7 C27_7 108.8(7) . . ?
O8_7 C28_7 C31_7 110.4(6) . . ?
O8_7 C28_7 C30_7 104.9(6) . . ?
C31_7 C28_7 C30_7 110.9(6) . . ?
O8_7 C28_7 C29_7 110.5(6) . . ?
C31_7 C28_7 C29_7 110.5(7) . . ?
C30_7 C28_7 C29_7 109.5(6) . . ?
O9_7 C32_7 C34_7 109.0(7) . . ?
O9_7 C32_7 C33_7 105.2(7) . . ?
C34_7 C32_7 C33_7 112.8(8) . . ?
O9_7 C32_7 C35_7 107.9(7) . . ?
C34_7 C32_7 C35_7 113.0(8) . . ?
C33_7 C32_7 C35_7 108.5(7) . . ?
O1_7 B1_7 O2_7 124.7(7) . . ?
O1_7 B1_7 O3_7 123.9(8) . . ?
O2_7 B1_7 O3_7 111.3(7) . . ?
O1_8 Zr1_8 C11_8 99.7(3) . . ?
O1_8 Zr1_8 C8_8 83.7(3) . . ?
C11_8 Zr1_8 C8_8 113.9(5) . . ?
O1_8 Zr1_8 C1_8 111.0(4) . . ?
C11_8 Zr1_8 C1_8 127.0(3) . . ?
C8_8 Zr1_8 C1_8 111.6(5) . . ?
O1_8 Zr1_8 C7_8 106.3(4) . . ?
C11_8 Zr1_8 C7_8 128.9(3) . . ?
C8_8 Zr1_8 C7_8 31.6(3) . . ?
C1_8 Zr1_8 C7_8 82.9(3) . . ?
O1_8 Zr1_8 C5_8 134.7(2) . . ?
C11_8 Zr1_8 C5_8 97.4(4) . . ?
C8_8 Zr1_8 C5_8 125.9(5) . . ?
C1_8 Zr1_8 C5_8 31.5(3) . . ?
C7_8 Zr1_8 C5_8 94.5(5) . . ?
O1_8 Zr1_8 C6_8 134.3(3) . . ?
C11_8 Zr1_8 C6_8 104.4(5) . . ?
C8_8 Zr1_8 C6_8 51.1(3) . . ?
C1_8 Zr1_8 C6_8 84.1(5) . . ?
C7_8 Zr1_8 C6_8 30.5(3) . . ?
C5_8 Zr1_8 C6_8 79.8(4) . . ?
O1_8 Zr1_8 C10_8 128.0(5) . . ?
C11_8 Zr1_8 C10_8 77.9(4) . . ?
C8_8 Zr1_8 C10_8 52.9(4) . . ?
C1_8 Zr1_8 C10_8 111.0(6) . . ?
C7_8 Zr1_8 C10_8 51.4(3) . . ?
C5_8 Zr1_8 C10_8 96.5(6) . . ?
C6_8 Zr1_8 C10_8 29.8(4) . . ?
O1_8 Zr1_8 C9_8 95.5(5) . . ?
C11_8 Zr1_8 C9_8 82.0(5) . . ?
C8_8 Zr1_8 C9_8 32.6(4) . . ?
C1_8 Zr1_8 C9_8 133.6(3) . . ?
C7_8 Zr1_8 C9_8 52.7(3) . . ?
C5_8 Zr1_8 C9_8 128.4(5) . . ?
C6_8 Zr1_8 C9_8 51.3(4) . . ?
C10_8 Zr1_8 C9_8 32.5(4) . . ?
O1_8 Zr1_8 C2_8 83.5(3) . . ?
C11_8 Zr1_8 C2_8 120.9(4) . . ?
C8_8 Zr1_8 C2_8 125.0(5) . . ?
C1_8 Zr1_8 C2_8 31.5(3) . . ?
C7_8 Zr1_8 C2_8 105.3(4) . . ?
C5_8 Zr1_8 C2_8 51.9(3) . . ?
C6_8 Zr1_8 C2_8 114.7(5) . . ?
C10_8 Zr1_8 C2_8 142.5(6) . . ?
C9_8 Zr1_8 C2_8 157.0(5) . . ?
O1_8 Zr1_8 C3_8 87.0(3) . . ?
C11_8 Zr1_8 C3_8 89.0(4) . . ?
C8_8 Zr1_8 C3_8 156.4(5) . . ?
C1_8 Zr1_8 C3_8 52.2(3) . . ?
C7_8 Zr1_8 C3_8 134.7(4) . . ?
C5_8 Zr1_8 C3_8 51.6(3) . . ?
C6_8 Zr1_8 C3_8 131.0(4) . . ?
C10_8 Zr1_8 C3_8 143.9(6) . . ?
C9_8 Zr1_8 C3_8 171.0(6) . . ?
C2_8 Zr1_8 C3_8 31.9(3) . . ?
O1_8 Zr1_8 C4_8 117.1(4) . . ?
C11_8 Zr1_8 C4_8 75.7(3) . . ?
C8_8 Zr1_8 C4_8 156.2(5) . . ?
C1_8 Zr1_8 C4_8 52.1(3) . . ?
C7_8 Zr1_8 C4_8 125.2(5) . . ?
C5_8 Zr1_8 C4_8 30.9(3) . . ?
C6_8 Zr1_8 C4_8 106.2(4) . . ?
C10_8 Zr1_8 C4_8 112.5(5) . . ?
C9_8 Zr1_8 C4_8 142.8(6) . . ?
C2_8 Zr1_8 C4_8 52.4(3) . . ?
C3_8 Zr1_8 C4_8 31.5(3) . . ?
O4_8 Si1_8 O2_8 111.7(3) . . ?
O4_8 Si1_8 O6_8 107.5(3) . . ?
O2_8 Si1_8 O6_8 113.3(3) . . ?
O4_8 Si1_8 O5_8 116.2(3) . . ?
O2_8 Si1_8 O5_8 105.3(3) . . ?
O6_8 Si1_8 O5_8 102.7(3) . . ?
O3_8 Si2_8 O8_8 113.6(2) . . ?
O3_8 Si2_8 O9_8 108.1(2) . . ?
O8_8 Si2_8 O9_8 107.4(2) . . ?
O3_8 Si2_8 O7_8 105.7(2) . . ?
O8_8 Si2_8 O7_8 108.6(2) . . ?
O9_8 Si2_8 O7_8 113.6(2) . . ?
B1_8 O1_8 Zr1_8 158.9(4) . . ?
B1_8 O2_8 Si1_8 153.1(5) . . ?
B1_8 O3_8 Si2_8 145.3(5) . . ?
C12_8 O4_8 Si1_8 134.2(5) . . ?
C16_8 O5_8 Si1_8 132.7(4) . . ?
C20_8 O6_8 Si1_8 132.1(5) . . ?
C24_8 O7_8 Si2_8 131.9(4) . . ?
C28_8 O8_8 Si2_8 131.0(4) . . ?
C32_8 O9_8 Si2_8 132.0(4) . . ?
C5_8 C1_8 C2_8 107.9(9) . . ?
C5_8 C1_8 Zr1_8 74.5(5) . . ?
C2_8 C1_8 Zr1_8 75.4(5) . . ?
C1_8 C2_8 C3_8 107.0(9) . . ?
C1_8 C2_8 Zr1_8 73.1(5) . . ?
C3_8 C2_8 Zr1_8 74.2(5) . . ?
C4_8 C3_8 C2_8 107.9(10) . . ?
C4_8 C3_8 Zr1_8 74.6(5) . . ?
C2_8 C3_8 Zr1_8 73.9(5) . . ?
C5_8 C4_8 C3_8 107.2(10) . . ?
C5_8 C4_8 Zr1_8 73.1(5) . . ?
C3_8 C4_8 Zr1_8 73.8(5) . . ?
C4_8 C5_8 C1_8 109.9(9) . . ?
C4_8 C5_8 Zr1_8 76.0(5) . . ?
C1_8 C5_8 Zr1_8 74.0(5) . . ?
C10_8 C6_8 C7_8 112.9(13) . . ?
C10_8 C6_8 Zr1_8 75.2(7) . . ?
C7_8 C6_8 Zr1_8 74.5(6) . . ?
C6_8 C7_8 C8_8 107.2(11) . . ?
C6_8 C7_8 Zr1_8 74.9(6) . . ?
C8_8 C7_8 Zr1_8 73.6(6) . . ?
C7_8 C8_8 C9_8 107.7(10) . . ?
C7_8 C8_8 Zr1_8 74.9(5) . . ?
C9_8 C8_8 Zr1_8 75.0(6) . . ?
C10_8 C9_8 C8_8 104.6(10) . . ?
C10_8 C9_8 Zr1_8 73.4(6) . . ?
C8_8 C9_8 Zr1_8 72.4(5) . . ?
C6_8 C10_8 C9_8 107.5(12) . . ?
C6_8 C10_8 Zr1_8 74.9(6) . . ?
C9_8 C10_8 Zr1_8 74.1(7) . . ?
C14_8 C12_8 O4_8 112.8(6) . . ?
C14_8 C12_8 C13_8 111.6(7) . . ?
O4_8 C12_8 C13_8 103.9(6) . . ?
C14_8 C12_8 C15_8 109.2(7) . . ?
O4_8 C12_8 C15_8 106.7(6) . . ?
C13_8 C12_8 C15_8 112.5(7) . . ?
O5_8 C16_8 C19_8 109.9(6) . . ?
O5_8 C16_8 C17_8 110.3(6) . . ?
C19_8 C16_8 C17_8 111.1(7) . . ?
O5_8 C16_8 C18_8 107.0(6) . . ?
C19_8 C16_8 C18_8 108.7(7) . . ?
C17_8 C16_8 C18_8 109.7(7) . . ?
O6_8 C20_8 C21_8 110.1(6) . . ?
O6_8 C20_8 C22_8 109.2(6) . . ?
C21_8 C20_8 C22_8 110.8(8) . . ?
O6_8 C20_8 C23_8 103.1(7) . . ?
C21_8 C20_8 C23_8 110.9(7) . . ?
C22_8 C20_8 C23_8 112.4(7) . . ?
O7_8 C24_8 C25_8 107.8(6) . . ?
O7_8 C24_8 C26_8 111.3(5) . . ?
C25_8 C24_8 C26_8 110.8(6) . . ?
O7_8 C24_8 C27_8 105.4(5) . . ?
C25_8 C24_8 C27_8 110.9(6) . . ?
C26_8 C24_8 C27_8 110.4(6) . . ?
O8_8 C28_8 C29_8 110.3(6) . . ?
O8_8 C28_8 C30_8 107.5(5) . . ?
C29_8 C28_8 C30_8 112.6(7) . . ?
O8_8 C28_8 C31_8 104.2(6) . . ?
C29_8 C28_8 C31_8 110.8(6) . . ?
C30_8 C28_8 C31_8 111.1(7) . . ?
O9_8 C32_8 C34_8 105.4(6) . . ?
O9_8 C32_8 C33_8 111.0(5) . . ?
C34_8 C32_8 C33_8 110.7(6) . . ?
O9_8 C32_8 C35_8 107.4(6) . . ?
C34_8 C32_8 C35_8 110.6(6) . . ?
C33_8 C32_8 C35_8 111.5(7) . . ?
O1_8 B1_8 O3_8 121.3(6) . . ?
O1_8 B1_8 O2_8 121.4(6) . . ?
O3_8 B1_8 O2_8 117.4(6) . . ?
O1_9 Zr1_9 C11_9 96.9(2) . . ?
O1_9 Zr1_9 C1_9 110.4(3) . . ?
C11_9 Zr1_9 C1_9 128.8(3) . . ?
O1_9 Zr1_9 C2_9 83.7(3) . . ?
C11_9 Zr1_9 C2_9 119.4(4) . . ?
C1_9 Zr1_9 C2_9 31.5(3) . . ?
O1_9 Zr1_9 C7_9 109.7(3) . . ?
C11_9 Zr1_9 C7_9 129.3(3) . . ?
C1_9 Zr1_9 C7_9 81.5(3) . . ?
C2_9 Zr1_9 C7_9 106.2(4) . . ?
O1_9 Zr1_9 C8_9 82.7(2) . . ?
C11_9 Zr1_9 C8_9 118.1(3) . . ?
C1_9 Zr1_9 C8_9 108.0(3) . . ?
C2_9 Zr1_9 C8_9 122.0(4) . . ?
C7_9 Zr1_9 C8_9 32.6(2) . . ?
O1_9 Zr1_9 C5_9 136.0(3) . . ?
C11_9 Zr1_9 C5_9 100.8(3) . . ?
C1_9 Zr1_9 C5_9 31.5(3) . . ?
C2_9 Zr1_9 C5_9 52.5(3) . . ?
C7_9 Zr1_9 C5_9 89.3(3) . . ?
C8_9 Zr1_9 C5_9 121.8(3) . . ?
O1_9 Zr1_9 C4_9 119.2(4) . . ?
C11_9 Zr1_9 C4_9 77.1(3) . . ?
C1_9 Zr1_9 C4_9 51.8(3) . . ?
C2_9 Zr1_9 C4_9 52.2(4) . . ?
C7_9 Zr1_9 C4_9 120.4(4) . . ?
C8_9 Zr1_9 C4_9 153.1(3) . . ?
C5_9 Zr1_9 C4_9 31.5(3) . . ?
O1_9 Zr1_9 C3_9 88.2(4) . . ?
C11_9 Zr1_9 C3_9 87.7(4) . . ?
C1_9 Zr1_9 C3_9 52.3(3) . . ?
C2_9 Zr1_9 C3_9 31.6(4) . . ?
C7_9 Zr1_9 C3_9 133.7(3) . . ?
C8_9 Zr1_9 C3_9 153.3(4) . . ?
C5_9 Zr1_9 C3_9 52.9(3) . . ?
C4_9 Zr1_9 C3_9 32.0(4) . . ?
O1_9 Zr1_9 C9_9 88.5(2) . . ?
C11_9 Zr1_9 C9_9 86.4(3) . . ?
C1_9 Zr1_9 C9_9 134.8(3) . . ?
C2_9 Zr1_9 C9_9 153.8(4) . . ?
C7_9 Zr1_9 C9_9 53.4(3) . . ?
C8_9 Zr1_9 C9_9 31.9(2) . . ?
C5_9 Zr1_9 C9_9 132.3(3) . . ?
C4_9 Zr1_9 C9_9 148.9(4) . . ?
C3_9 Zr1_9 C9_9 172.9(3) . . ?
O1_9 Zr1_9 C10_9 119.4(2) . . ?
C11_9 Zr1_9 C10_9 76.1(3) . . ?
C1_9 Zr1_9 C10_9 120.4(3) . . ?
C2_9 Zr1_9 C10_9 152.0(3) . . ?
C7_9 Zr1_9 C10_9 53.3(3) . . ?
C8_9 Zr1_9 C10_9 53.0(3) . . ?
C5_9 Zr1_9 C10_9 103.9(3) . . ?
C4_9 Zr1_9 C10_9 117.3(4) . . ?
C3_9 Zr1_9 C10_9 149.0(5) . . ?
C9_9 Zr1_9 C10_9 31.9(2) . . ?
O1_9 Zr1_9 C6_9 135.2(2) . . ?
C11_9 Zr1_9 C6_9 101.2(3) . . ?
C1_9 Zr1_9 C6_9 89.2(3) . . ?
C2_9 Zr1_9 C6_9 120.4(3) . . ?
C7_9 Zr1_9 C6_9 31.6(2) . . ?
C8_9 Zr1_9 C6_9 52.7(3) . . ?
C5_9 Zr1_9 C6_9 79.9(3) . . ?
C4_9 Zr1_9 C6_9 104.7(4) . . ?
C3_9 Zr1_9 C6_9 132.8(3) . . ?
C9_9 Zr1_9 C6_9 52.6(3) . . ?
C10_9 Zr1_9 C6_9 32.0(2) . . ?
O4B_9 Si1_9 O6A_9 139.4(7) . . ?
O4B_9 Si1_9 O6B_9 109.4(7) . . ?
O6A_9 Si1_9 O6B_9 34.9(5) . . ?
O4B_9 Si1_9 O2_9 106.6(6) . . ?
O6A_9 Si1_9 O2_9 107.6(5) . . ?
O6B_9 Si1_9 O2_9 114.4(5) . . ?
O4B_9 Si1_9 O5A_9 74.7(6) . . ?
O6A_9 Si1_9 O5A_9 113.2(5) . . ?
O6B_9 Si1_9 O5A_9 132.5(6) . . ?
O2_9 Si1_9 O5A_9 108.9(4) . . ?
O4B_9 Si1_9 O5B_9 108.1(6) . . ?
O6A_9 Si1_9 O5B_9 79.8(5) . . ?
O6B_9 Si1_9 O5B_9 108.3(6) . . ?
O2_9 Si1_9 O5B_9 109.9(4) . . ?
O5A_9 Si1_9 O5B_9 35.6(4) . . ?
O4B_9 Si1_9 O4A_9 37.6(5) . . ?
O6A_9 Si1_9 O4A_9 108.9(6) . . ?
O6B_9 Si1_9 O4A_9 74.6(6) . . ?
O2_9 Si1_9 O4A_9 109.9(4) . . ?
O5A_9 Si1_9 O4A_9 108.4(5) . . ?
O5B_9 Si1_9 O4A_9 133.9(5) . . ?
O3_9 Si2_9 O8_9 108.2(3) . . ?
O3_9 Si2_9 O9_9 107.6(3) . . ?
O8_9 Si2_9 O9_9 113.8(3) . . ?
O3_9 Si2_9 O7_9 112.0(3) . . ?
O8_9 Si2_9 O7_9 107.3(3) . . ?
O9_9 Si2_9 O7_9 108.0(3) . . ?
B1_9 O1_9 Zr1_9 170.4(5) . . ?
B1_9 O2_9 Si1_9 147.5(5) . . ?
B1_9 O3_9 Si2_9 150.7(5) . . ?
C12_9 O4A_9 Si1_9 132.0(9) . . ?
C16_9 O5A_9 Si1_9 119.2(9) . . ?
C20_9 O6A_9 Si1_9 133.5(9) . . ?
Si1_9 O4B_9 C12_9 133.2(10) . . ?
C16_9 O5B_9 Si1_9 125.2(9) . . ?
C20_9 O6B_9 Si1_9 130.8(11) . . ?
C24_9 O7_9 Si2_9 134.2(6) . . ?
C28_9 O8_9 Si2_9 130.1(5) . . ?
C32_9 O9_9 Si2_9 131.8(5) . . ?
C2_9 C1_9 C5_9 110.1(10) . . ?
C2_9 C1_9 Zr1_9 75.2(5) . . ?
C5_9 C1_9 Zr1_9 75.9(5) . . ?
C1_9 C2_9 C3_9 108.1(11) . . ?
C1_9 C2_9 Zr1_9 73.3(5) . . ?
C3_9 C2_9 Zr1_9 74.9(6) . . ?
C2_9 C3_9 C4_9 106.4(10) . . ?
C2_9 C3_9 Zr1_9 73.5(6) . . ?
C4_9 C3_9 Zr1_9 73.9(6) . . ?
C5_9 C4_9 C3_9 109.0(11) . . ?
C5_9 C4_9 Zr1_9 74.3(5) . . ?
C3_9 C4_9 Zr1_9 74.0(6) . . ?
C1_9 C5_9 C4_9 106.4(10) . . ?
C1_9 C5_9 Zr1_9 72.6(5) . . ?
C4_9 C5_9 Zr1_9 74.2(5) . . ?
C7_9 C6_9 C10_9 109.4(8) . . ?
C7_9 C6_9 Zr1_9 73.0(4) . . ?
C10_9 C6_9 Zr1_9 73.9(4) . . ?
C6_9 C7_9 C8_9 107.1(8) . . ?
C6_9 C7_9 Zr1_9 75.3(5) . . ?
C8_9 C7_9 Zr1_9 73.9(4) . . ?
C9_9 C8_9 C7_9 108.0(8) . . ?
C9_9 C8_9 Zr1_9 74.5(4) . . ?
C7_9 C8_9 Zr1_9 73.5(4) . . ?
C8_9 C9_9 C10_9 108.6(7) . . ?
C8_9 C9_9 Zr1_9 73.6(4) . . ?
C10_9 C9_9 Zr1_9 74.5(4) . . ?
C9_9 C10_9 C6_9 106.9(8) . . ?
C9_9 C10_9 Zr1_9 73.6(4) . . ?
C6_9 C10_9 Zr1_9 74.1(5) . . ?
O4A_9 C12_9 C14B_9 116.7(14) . . ?
O4A_9 C12_9 C14A_9 121.8(12) . . ?
C14B_9 C12_9 C14A_9 65.1(13) . . ?
O4A_9 C12_9 C13A_9 95.6(14) . . ?
C14B_9 C12_9 C13A_9 60.6(14) . . ?
C14A_9 C12_9 C13A_9 123.6(15) . . ?
O4A_9 C12_9 C15A_9 102.7(11) . . ?
C14B_9 C12_9 C15A_9 132.1(16) . . ?
C14A_9 C12_9 C15A_9 116.2(14) . . ?
C13A_9 C12_9 C15A_9 90.8(14) . . ?
O4A_9 C12_9 C15B_9 115.9(13) . . ?
C14B_9 C12_9 C15B_9 121.1(18) . . ?
C14A_9 C12_9 C15B_9 66.0(13) . . ?
C13A_9 C12_9 C15B_9 135.5(16) . . ?
C15A_9 C12_9 C15B_9 53.7(12) . . ?
O4A_9 C12_9 O4B_9 40.4(6) . . ?
C14B_9 C12_9 O4B_9 104.1(14) . . ?
C14A_9 C12_9 O4B_9 81.6(11) . . ?
C13A_9 C12_9 O4B_9 124.7(14) . . ?
C15A_9 C12_9 O4B_9 123.7(12) . . ?
C15B_9 C12_9 O4B_9 99.0(13) . . ?
C19_9 C16_9 C18_9 108.6(12) . . ?
C19_9 C16_9 O5B_9 91.6(11) . . ?
C18_9 C16_9 O5B_9 121.4(12) . . ?
C19_9 C16_9 C17B_9 132.0(15) . . ?
C18_9 C16_9 C17B_9 92.8(14) . . ?
O5B_9 C16_9 C17B_9 113.5(11) . . ?
C19_9 C16_9 C17A_9 96.1(15) . . ?
C18_9 C16_9 C17A_9 126.6(13) . . ?
O5B_9 C16_9 C17A_9 103.8(12) . . ?
C17B_9 C16_9 C17A_9 40.1(9) . . ?
C19_9 C16_9 O5A_9 119.4(10) . . ?
C18_9 C16_9 O5A_9 87.2(12) . . ?
O5B_9 C16_9 O5A_9 37.5(5) . . ?
C17B_9 C16_9 O5A_9 103.7(12) . . ?
C17A_9 C16_9 O5A_9 120.8(11) . . ?
C23A_9 C20_9 C23B_9 153(2) . . ?
C23A_9 C20_9 O6B_9 127(2) . . ?
C23B_9 C20_9 O6B_9 79.8(13) . . ?
C23A_9 C20_9 O6A_9 90(2) . . ?
C23B_9 C20_9 O6A_9 116.9(13) . . ?
O6B_9 C20_9 O6A_9 37.1(6) . . ?
C23A_9 C20_9 C22B_9 55(2) . . ?
C23B_9 C20_9 C22B_9 117.0(15) . . ?
O6B_9 C20_9 C22B_9 119.0(12) . . ?
O6A_9 C20_9 C22B_9 98.9(11) . . ?
C23A_9 C20_9 C22A_9 119(2) . . ?
C23B_9 C20_9 C22A_9 46.5(13) . . ?
O6B_9 C20_9 C22A_9 99.0(14) . . ?
O6A_9 C20_9 C22A_9 124.7(13) . . ?
C22B_9 C20_9 C22A_9 136.4(15) . . ?
C23A_9 C20_9 C21A_9 106(2) . . ?
C23B_9 C20_9 C21A_9 62.0(16) . . ?
O6B_9 C20_9 C21A_9 105.4(16) . . ?
O6A_9 C20_9 C21A_9 121.5(15) . . ?
C22B_9 C20_9 C21A_9 55.1(14) . . ?
C22A_9 C20_9 C21A_9 96.6(19) . . ?
C23A_9 C20_9 C21B_9 52(2) . . ?
C23B_9 C20_9 C21B_9 118.0(15) . . ?
O6B_9 C20_9 C21B_9 119.0(11) . . ?
O6A_9 C20_9 C21B_9 99.1(10) . . ?
C22B_9 C20_9 C21B_9 103.8(12) . . ?
C22A_9 C20_9 C21B_9 71.6(13) . . ?
C21A_9 C20_9 C21B_9 135.1(16) . . ?
O7_9 C24_9 C27_9 113.4(8) . . ?
O7_9 C24_9 C25_9 107.4(9) . . ?
C27_9 C24_9 C25_9 116.9(11) . . ?
O7_9 C24_9 C26_9 106.5(8) . . ?
C27_9 C24_9 C26_9 104.1(9) . . ?
C25_9 C24_9 C26_9 107.9(9) . . ?
O8_9 C28_9 C29_9 105.9(7) . . ?
O8_9 C28_9 C31_9 109.2(7) . . ?
C29_9 C28_9 C31_9 110.1(9) . . ?
O8_9 C28_9 C30_9 110.9(8) . . ?
C29_9 C28_9 C30_9 110.4(8) . . ?
C31_9 C28_9 C30_9 110.3(9) . . ?
O9_9 C32_9 C35_9 111.9(8) . . ?
O9_9 C32_9 C33_9 108.1(7) . . ?
C35_9 C32_9 C33_9 110.6(8) . . ?
O9_9 C32_9 C34_9 105.6(7) . . ?
C35_9 C32_9 C34_9 111.0(8) . . ?
C33_9 C32_9 C34_9 109.6(8) . . ?
O1_9 B1_9 O2_9 124.5(7) . . ?
O1_9 B1_9 O3_9 118.0(7) . . ?
O2_9 B1_9 O3_9 117.5(7) . . ?
O1_10 Zr1_10 C11_10 98.8(2) . . ?
O1_10 Zr1_10 C2_10 89.2(3) . . ?
C11_10 Zr1_10 C2_10 128.0(3) . . ?
O1_10 Zr1_10 C1_10 122.3(4) . . ?
C11_10 Zr1_10 C1_10 119.6(5) . . ?
C2_10 Zr1_10 C1_10 33.5(3) . . ?
O1_10 Zr1_10 C8_10 83.0(2) . . ?
C11_10 Zr1_10 C8_10 121.7(3) . . ?
C2_10 Zr1_10 C8_10 110.2(4) . . ?
C1_10 Zr1_10 C8_10 106.7(4) . . ?
O1_10 Zr1_10 C7_10 111.5(3) . . ?
C11_10 Zr1_10 C7_10 128.0(3) . . ?
C2_10 Zr1_10 C7_10 94.6(4) . . ?
C1_10 Zr1_10 C7_10 78.3(3) . . ?
C8_10 Zr1_10 C7_10 32.4(3) . . ?
O1_10 Zr1_10 C9_10 86.8(3) . . ?
C11_10 Zr1_10 C9_10 89.5(4) . . ?
C2_10 Zr1_10 C9_10 142.3(4) . . ?
C1_10 Zr1_10 C9_10 130.6(3) . . ?
C8_10 Zr1_10 C9_10 32.2(3) . . ?
C7_10 Zr1_10 C9_10 52.9(3) . . ?
O1_10 Zr1_10 C5_10 132.1(3) . . ?
C11_10 Zr1_10 C5_10 86.4(4) . . ?
C2_10 Zr1_10 C5_10 53.4(3) . . ?
C1_10 Zr1_10 C5_10 33.3(3) . . ?
C8_10 Zr1_10 C5_10 133.7(4) . . ?
C7_10 Zr1_10 C5_10 101.4(4) . . ?
C9_10 Zr1_10 C5_10 141.0(4) . . ?
O1_10 Zr1_10 C6_10 136.3(3) . . ?
C11_10 Zr1_10 C6_10 98.2(4) . . ?
C2_10 Zr1_10 C6_10 110.7(5) . . ?
C1_10 Zr1_10 C6_10 81.8(4) . . ?
C8_10 Zr1_10 C6_10 53.9(3) . . ?
C7_10 Zr1_10 C6_10 32.1(3) . . ?
C9_10 Zr1_10 C6_10 53.4(3) . . ?
C5_10 Zr1_10 C6_10 88.9(4) . . ?
O1_10 Zr1_10 C10_10 117.7(3) . . ?
C11_10 Zr1_10 C10_10 75.9(3) . . ?
C2_10 Zr1_10 C10_10 142.7(5) . . ?
C1_10 Zr1_10 C10_10 112.6(4) . . ?
C8_10 Zr1_10 C10_10 53.7(3) . . ?
C7_10 Zr1_10 C10_10 52.9(4) . . ?
C9_10 Zr1_10 C10_10 32.4(3) . . ?
C5_10 Zr1_10 C10_10 109.8(4) . . ?
C6_10 Zr1_10 C10_10 32.0(3) . . ?
O1_10 Zr1_10 C3_10 81.6(3) . . ?
C11_10 Zr1_10 C3_10 99.4(4) . . ?
C2_10 Zr1_10 C3_10 30.9(3) . . ?
C1_10 Zr1_10 C3_10 52.8(3) . . ?
C8_10 Zr1_10 C3_10 137.8(4) . . ?
C7_10 Zr1_10 C3_10 125.4(4) . . ?
C9_10 Zr1_10 C3_10 166.3(4) . . ?
C5_10 Zr1_10 C3_10 50.8(3) . . ?
C6_10 Zr1_10 C3_10 134.2(4) . . ?
C10_10 Zr1_10 C3_10 160.6(4) . . ?
O1_10 Zr1_10 C4_10 104.3(3) . . ?
C11_10 Zr1_10 C4_10 77.8(3) . . ?
C2_10 Zr1_10 C4_10 50.7(3) . . ?
C1_10 Zr1_10 C4_10 52.2(4) . . ?
C8_10 Zr1_10 C4_10 158.5(4) . . ?
C7_10 Zr1_10 C4_10 129.4(4) . . ?
C9_10 Zr1_10 C4_10 164.2(4) . . ?
C5_10 Zr1_10 C4_10 30.2(3) . . ?
C6_10 Zr1_10 C4_10 118.6(4) . . ?
C10_10 Zr1_10 C4_10 133.0(4) . . ?
C3_10 Zr1_10 C4_10 29.4(3) . . ?
O4_10 Si1_10 O5_10 112.4(3) . . ?
O4_10 Si1_10 O6_10 107.6(2) . . ?
O5_10 Si1_10 O6_10 107.3(2) . . ?
O4_10 Si1_10 O2_10 109.0(2) . . ?
O5_10 Si1_10 O2_10 106.9(2) . . ?
O6_10 Si1_10 O2_10 113.7(2) . . ?
O7_10 Si2_10 O8_10 108.6(3) . . ?
O7_10 Si2_10 O9_10 113.8(3) . . ?
O8_10 Si2_10 O9_10 106.9(3) . . ?
O7_10 Si2_10 O3_10 104.6(2) . . ?
O8_10 Si2_10 O3_10 113.8(2) . . ?
O9_10 Si2_10 O3_10 109.2(3) . . ?
B1_10 O1_10 Zr1_10 154.7(5) . . ?
B1_10 O2_10 Si1_10 136.4(4) . . ?
B1_10 O3_10 Si2_10 144.7(5) . . ?
C12_10 O4_10 Si1_10 133.8(4) . . ?
C16_10 O5_10 Si1_10 129.9(5) . . ?
C20_10 O6_10 Si1_10 132.3(4) . . ?
C24_10 O7_10 Si2_10 131.5(4) . . ?
C28_10 O8_10 Si2_10 132.3(5) . . ?
C32_10 O9_10 Si2_10 132.4(4) . . ?
C2_10 C1_10 C5_10 102.6(8) . . ?
C2_10 C1_10 Zr1_10 72.2(5) . . ?
C5_10 C1_10 Zr1_10 73.7(5) . . ?
C3_10 C2_10 C1_10 108.1(10) . . ?
C3_10 C2_10 Zr1_10 77.5(6) . . ?
C1_10 C2_10 Zr1_10 74.3(6) . . ?
C4_10 C3_10 C2_10 109.7(11) . . ?
C4_10 C3_10 Zr1_10 75.7(6) . . ?
C2_10 C3_10 Zr1_10 71.6(6) . . ?
C3_10 C4_10 C5_10 112.0(12) . . ?
C3_10 C4_10 Zr1_10 74.9(6) . . ?
C5_10 C4_10 Zr1_10 73.1(6) . . ?
C4_10 C5_10 C1_10 107.5(10) . . ?
C4_10 C5_10 Zr1_10 76.7(6) . . ?
C1_10 C5_10 Zr1_10 72.9(6) . . ?
C7_10 C6_10 C10_10 107.5(10) . . ?
C7_10 C6_10 Zr1_10 73.2(5) . . ?
C10_10 C6_10 Zr1_10 74.6(5) . . ?
C6_10 C7_10 C8_10 109.6(11) . . ?
C6_10 C7_10 Zr1_10 74.7(5) . . ?
C8_10 C7_10 Zr1_10 73.7(5) . . ?
C9_10 C8_10 C7_10 106.5(10) . . ?
C9_10 C8_10 Zr1_10 74.0(5) . . ?
C7_10 C8_10 Zr1_10 73.8(5) . . ?
C8_10 C9_10 C10_10 109.1(10) . . ?
C8_10 C9_10 Zr1_10 73.8(5) . . ?
C10_10 C9_10 Zr1_10 75.0(5) . . ?
C6_10 C10_10 C9_10 107.4(10) . . ?
C6_10 C10_10 Zr1_10 73.4(5) . . ?
C9_10 C10_10 Zr1_10 72.6(5) . . ?
O4_10 C12_10 C14_10 109.6(6) . . ?
O4_10 C12_10 C13_10 105.4(6) . . ?
C14_10 C12_10 C13_10 111.7(7) . . ?
O4_10 C12_10 C15_10 106.5(6) . . ?
C14_10 C12_10 C15_10 112.6(7) . . ?
C13_10 C12_10 C15_10 110.7(6) . . ?
C18A_10 C16_10 C18B_10 130.8(14) . . ?
C18A_10 C16_10 O5_10 115.7(12) . . ?
C18B_10 C16_10 O5_10 111.7(10) . . ?
C18A_10 C16_10 C17B_10 60.0(11) . . ?
C18B_10 C16_10 C17B_10 112.3(13) . . ?
O5_10 C16_10 C17B_10 112.4(8) . . ?
C18A_10 C16_10 C19A_10 118.7(15) . . ?
C18B_10 C16_10 C19A_10 57.5(11) . . ?
O5_10 C16_10 C19A_10 105.1(10) . . ?
C17B_10 C16_10 C19A_10 63.1(10) . . ?
C18A_10 C16_10 C17A_10 117.7(13) . . ?
C18B_10 C16_10 C17A_10 36.8(10) . . ?
O5_10 C16_10 C17A_10 102.2(8) . . ?
C17B_10 C16_10 C17A_10 142.3(11) . . ?
C19A_10 C16_10 C17A_10 94.2(12) . . ?
C18A_10 C16_10 C19B_10 42.3(10) . . ?
C18B_10 C16_10 C19B_10 114.3(12) . . ?
O5_10 C16_10 C19B_10 103.2(8) . . ?
C17B_10 C16_10 C19B_10 102.3(9) . . ?
C19A_10 C16_10 C19B_10 151.4(11) . . ?
C17A_10 C16_10 C19B_10 83.4(9) . . ?
O6_10 C20_10 C21_10 111.4(6) . . ?
O6_10 C20_10 C23_10 105.3(6) . . ?
C21_10 C20_10 C23_10 109.8(6) . . ?
O6_10 C20_10 C22_10 109.2(6) . . ?
C21_10 C20_10 C22_10 109.6(7) . . ?
C23_10 C20_10 C22_10 111.5(8) . . ?
O7_10 C24_10 C25_10 106.8(6) . . ?
O7_10 C24_10 C27_10 105.4(6) . . ?
C25_10 C24_10 C27_10 112.1(7) . . ?
O7_10 C24_10 C26_10 110.2(6) . . ?
C25_10 C24_10 C26_10 111.3(7) . . ?
C27_10 C24_10 C26_10 110.7(6) . . ?
O8_10 C28_10 C29_10 106.6(7) . . ?
O8_10 C28_10 C30_10 109.8(6) . . ?
C29_10 C28_10 C30_10 110.2(6) . . ?
O8_10 C28_10 C31_10 110.3(6) . . ?
C29_10 C28_10 C31_10 110.7(7) . . ?
C30_10 C28_10 C31_10 109.2(8) . . ?
O9_10 C32_10 C33_10 111.0(6) . . ?
O9_10 C32_10 C34_10 105.4(6) . . ?
C33_10 C32_10 C34_10 111.4(7) . . ?
O9_10 C32_10 C35_10 108.6(6) . . ?
C33_10 C32_10 C35_10 110.5(7) . . ?
C34_10 C32_10 C35_10 109.8(7) . . ?
O1_10 B1_10 O3_10 119.3(7) . . ?
O1_10 B1_10 O2_10 123.6(6) . . ?
O3_10 B1_10 O2_10 117.1(6) . . ?
O1_11 Zr1_11 C11_11 97.6(2) . . ?
O1_11 Zr1_11 C7_11 107.7(2) . . ?
C11_11 Zr1_11 C7_11 129.8(3) . . ?
O1_11 Zr1_11 C5_11 135.7(3) . . ?
C11_11 Zr1_11 C5_11 95.4(4) . . ?
C7_11 Zr1_11 C5_11 95.4(3) . . ?
O1_11 Zr1_11 C1_11 115.0(3) . . ?
C11_11 Zr1_11 C1_11 126.7(3) . . ?
C7_11 Zr1_11 C1_11 80.2(3) . . ?
C5_11 Zr1_11 C1_11 32.2(3) . . ?
O1_11 Zr1_11 C2_11 85.3(2) . . ?
C11_11 Zr1_11 C2_11 124.5(3) . . ?
C7_11 Zr1_11 C2_11 100.7(3) . . ?
C5_11 Zr1_11 C2_11 53.0(3) . . ?
C1_11 Zr1_11 C2_11 32.1(2) . . ?
O1_11 Zr1_11 C9_11 90.7(2) . . ?
C11_11 Zr1_11 C9_11 84.6(3) . . ?
C7_11 Zr1_11 C9_11 53.3(2) . . ?
C5_11 Zr1_11 C9_11 132.7(3) . . ?
C1_11 Zr1_11 C9_11 132.5(3) . . ?
C2_11 Zr1_11 C9_11 150.9(3) . . ?
O1_11 Zr1_11 C6_11 135.1(2) . . ?
C11_11 Zr1_11 C6_11 103.0(3) . . ?
C7_11 Zr1_11 C6_11 31.7(2) . . ?
C5_11 Zr1_11 C6_11 81.5(3) . . ?
C1_11 Zr1_11 C6_11 83.0(3) . . ?
C2_11 Zr1_11 C6_11 113.3(3) . . ?
C9_11 Zr1_11 C6_11 52.9(2) . . ?
O1_11 Zr1_11 C8_11 82.7(2) . . ?
C11_11 Zr1_11 C8_11 116.8(3) . . ?
C7_11 Zr1_11 C8_11 31.8(2) . . ?
C5_11 Zr1_11 C8_11 127.2(3) . . ?
C1_11 Zr1_11 C8_11 108.6(3) . . ?
C2_11 Zr1_11 C8_11 118.5(3) . . ?
C9_11 Zr1_11 C8_11 32.5(2) . . ?
C6_11 Zr1_11 C8_11 52.4(3) . . ?
O1_11 Zr1_11 C10_11 122.6(2) . . ?
C11_11 Zr1_11 C10_11 77.4(3) . . ?
C7_11 Zr1_11 C10_11 52.4(3) . . ?
C5_11 Zr1_11 C10_11 101.5(3) . . ?
C1_11 Zr1_11 C10_11 112.7(3) . . ?
C2_11 Zr1_11 C10_11 144.2(3) . . ?
C9_11 Zr1_11 C10_11 32.2(2) . . ?
C6_11 Zr1_11 C10_11 31.3(2) . . ?
C8_11 Zr1_11 C10_11 52.8(3) . . ?
O1_11 Zr1_11 C3_11 84.3(2) . . ?
C11_11 Zr1_11 C3_11 92.7(3) . . ?
C7_11 Zr1_11 C3_11 131.6(3) . . ?
C5_11 Zr1_11 C3_11 52.9(3) . . ?
C1_11 Zr1_11 C3_11 53.2(3) . . ?
C2_11 Zr1_11 C3_11 32.1(2) . . ?
C9_11 Zr1_11 C3_11 174.0(3) . . ?
C6_11 Zr1_11 C3_11 133.1(3) . . ?
C8_11 Zr1_11 C3_11 149.0(3) . . ?
C10_11 Zr1_11 C3_11 152.1(3) . . ?
O1_11 Zr1_11 C4_11 113.4(3) . . ?
C11_11 Zr1_11 C4_11 76.7(3) . . ?
C7_11 Zr1_11 C4_11 126.6(3) . . ?
C5_11 Zr1_11 C4_11 31.3(3) . . ?
C1_11 Zr1_11 C4_11 52.4(3) . . ?
C2_11 Zr1_11 C4_11 52.5(3) . . ?
C9_11 Zr1_11 C4_11 151.0(3) . . ?
C6_11 Zr1_11 C4_11 109.9(3) . . ?
C8_11 Zr1_11 C4_11 158.4(3) . . ?
C10_11 Zr1_11 C4_11 120.4(3) . . ?
C3_11 Zr1_11 C4_11 31.9(2) . . ?
O4_11 Si1_11 O6_11 108.2(2) . . ?
O4_11 Si1_11 O5_11 111.9(3) . . ?
O6_11 Si1_11 O5_11 108.7(3) . . ?
O4_11 Si1_11 O2_11 108.0(3) . . ?
O6_11 Si1_11 O2_11 112.1(2) . . ?
O5_11 Si1_11 O2_11 108.0(2) . . ?
O7B_11 Si2_11 O8A_11 139.9(5) . . ?
O7B_11 Si2_11 O9_11 103.6(5) . . ?
O8A_11 Si2_11 O9_11 105.8(4) . . ?
O7B_11 Si2_11 O3_11 95.1(5) . . ?
O8A_11 Si2_11 O3_11 99.8(4) . . ?
O9_11 Si2_11 O3_11 110.1(3) . . ?
O7B_11 Si2_11 O8B_11 110.1(6) . . ?
O8A_11 Si2_11 O8B_11 30.8(4) . . ?
O9_11 Si2_11 O8B_11 117.0(4) . . ?
O3_11 Si2_11 O8B_11 117.7(4) . . ?
O7B_11 Si2_11 O7A_11 33.9(4) . . ?
O8A_11 Si2_11 O7A_11 108.7(4) . . ?
O9_11 Si2_11 O7A_11 110.7(3) . . ?
O3_11 Si2_11 O7A_11 120.3(3) . . ?
O8B_11 Si2_11 O7A_11 77.9(5) . . ?
B1_11 O1_11 Zr1_11 155.0(5) . . ?
B1_11 O2_11 Si1_11 133.2(5) . . ?
B1_11 O3_11 Si2_11 142.1(5) . . ?
C12_11 O4_11 Si1_11 133.1(4) . . ?
C16_11 O5_11 Si1_11 133.3(5) . . ?
C20_11 O6_11 Si1_11 132.3(5) . . ?
C24_11 O7A_11 Si2_11 129.2(6) . . ?
C28_11 O8A_11 Si2_11 134.2(6) . . ?
C24_11 O7B_11 Si2_11 137.9(9) . . ?
C28_11 O8B_11 Si2_11 133.3(8) . . ?
C32_11 O9_11 Si2_11 141.0(5) . . ?
C2_11 C1_11 C5_11 107.4(8) . . ?
C2_11 C1_11 Zr1_11 74.1(4) . . ?
C5_11 C1_11 Zr1_11 73.8(5) . . ?
C1_11 C2_11 C3_11 108.4(8) . . ?
C1_11 C2_11 Zr1_11 73.8(4) . . ?
C3_11 C2_11 Zr1_11 74.7(4) . . ?
C4_11 C3_11 C2_11 106.5(8) . . ?
C4_11 C3_11 Zr1_11 74.1(4) . . ?
C2_11 C3_11 Zr1_11 73.2(4) . . ?
C5_11 C4_11 C3_11 109.4(8) . . ?
C5_11 C4_11 Zr1_11 73.2(5) . . ?
C3_11 C4_11 Zr1_11 74.0(4) . . ?
C4_11 C5_11 C1_11 108.3(9) . . ?
C4_11 C5_11 Zr1_11 75.5(5) . . ?
C1_11 C5_11 Zr1_11 74.0(4) . . ?
C10_11 C6_11 C7_11 108.8(8) . . ?
C10_11 C6_11 Zr1_11 74.9(5) . . ?
C7_11 C6_11 Zr1_11 72.8(4) . . ?
C6_11 C7_11 C8_11 108.9(8) . . ?
C6_11 C7_11 Zr1_11 75.5(4) . . ?
C8_11 C7_11 Zr1_11 75.8(4) . . ?
C7_11 C8_11 C9_11 107.4(7) . . ?
C7_11 C8_11 Zr1_11 72.4(4) . . ?
C9_11 C8_11 Zr1_11 73.4(4) . . ?
C10_11 C9_11 C8_11 106.2(7) . . ?
C10_11 C9_11 Zr1_11 74.4(4) . . ?
C8_11 C9_11 Zr1_11 74.1(4) . . ?
C6_11 C10_11 C9_11 108.5(8) . . ?
C6_11 C10_11 Zr1_11 73.9(4) . . ?
C9_11 C10_11 Zr1_11 73.4(4) . . ?
O4_11 C12_11 C13_11 106.1(6) . . ?
O4_11 C12_11 C15_11 108.0(6) . . ?
C13_11 C12_11 C15_11 112.2(8) . . ?
O4_11 C12_11 C14_11 109.6(7) . . ?
C13_11 C12_11 C14_11 110.7(8) . . ?
C15_11 C12_11 C14_11 110.1(7) . . ?
O5_11 C16_11 C17_11 113.0(8) . . ?
O5_11 C16_11 C18A_11 108.7(8) . . ?
C17_11 C16_11 C18A_11 126.9(9) . . ?
O5_11 C16_11 C19_11 107.6(8) . . ?
C17_11 C16_11 C19_11 104.2(10) . . ?
C18A_11 C16_11 C19_11 92.7(11) . . ?
O5_11 C16_11 C18B_11 99.6(10) . . ?
C17_11 C16_11 C18B_11 78.5(10) . . ?
C18A_11 C16_11 C18B_11 63.2(10) . . ?
C19_11 C16_11 C18B_11 148.5(13) . . ?
C16_11 C17_11 C18B_11 55.7(8) . . ?
C16_11 C18B_11 C17_11 45.8(7) . . ?
O6_11 C20_11 C22_11 108.7(6) . . ?
O6_11 C20_11 C23_11 105.2(7) . . ?
C22_11 C20_11 C23_11 111.7(7) . . ?
O6_11 C20_11 C21_11 109.0(6) . . ?
C22_11 C20_11 C21_11 111.5(7) . . ?
C23_11 C20_11 C21_11 110.6(7) . . ?
O7A_11 C24_11 O7B_11 38.3(5) . . ?
O7A_11 C24_11 C27_11 122.3(9) . . ?
O7B_11 C24_11 C27_11 85.6(9) . . ?
O7A_11 C24_11 C25_11 95.4(7) . . ?
O7B_11 C24_11 C25_11 119.7(8) . . ?
C27_11 C24_11 C25_11 107.0(8) . . ?
O7A_11 C24_11 C26_11 106.6(7) . . ?
O7B_11 C24_11 C26_11 114.4(7) . . ?
C27_11 C24_11 C26_11 110.0(9) . . ?
C25_11 C24_11 C26_11 115.2(7) . . ?
O8B_11 C28_11 O8A_11 34.7(5) . . ?
O8B_11 C28_11 C31_11 127.0(9) . . ?
O8A_11 C28_11 C31_11 94.1(8) . . ?
O8B_11 C28_11 C29_11 91.1(8) . . ?
O8A_11 C28_11 C29_11 116.7(7) . . ?
C31_11 C28_11 C29_11 111.4(9) . . ?
O8B_11 C28_11 C30_11 105.3(7) . . ?
O8A_11 C28_11 C30_11 113.5(7) . . ?
C31_11 C28_11 C30_11 110.1(7) . . ?
C29_11 C28_11 C30_11 110.1(7) . . ?
O9_11 C32_11 C34_11 107.6(6) . . ?
O9_11 C32_11 C33_11 108.3(6) . . ?
C34_11 C32_11 C33_11 110.6(6) . . ?
O9_11 C32_11 C35_11 109.8(6) . . ?
C34_11 C32_11 C35_11 111.5(6) . . ?
C33_11 C32_11 C35_11 109.0(7) . . ?
O1_11 B1_11 O3_11 119.1(7) . . ?
O1_11 B1_11 O2_11 123.4(7) . . ?
O3_11 B1_11 O2_11 117.5(7) . . ?
O1_12 Zr1_12 C11_12 97.2(2) . . ?
O1_12 Zr1_12 C1_12 113.0(4) . . ?
C11_12 Zr1_12 C1_12 127.9(4) . . ?
O1_12 Zr1_12 C2_12 84.1(3) . . ?
C11_12 Zr1_12 C2_12 122.5(3) . . ?
C1_12 Zr1_12 C2_12 32.2(3) . . ?
O1_12 Zr1_12 C3_12 85.7(3) . . ?
C11_12 Zr1_12 C3_12 90.3(3) . . ?
C1_12 Zr1_12 C3_12 53.2(3) . . ?
C2_12 Zr1_12 C3_12 32.3(3) . . ?
O1_12 Zr1_12 C4_12 115.3(3) . . ?
C11_12 Zr1_12 C4_12 76.2(4) . . ?
C1_12 Zr1_12 C4_12 53.0(4) . . ?
C2_12 Zr1_12 C4_12 52.9(3) . . ?
C3_12 Zr1_12 C4_12 31.7(3) . . ?
O1_12 Zr1_12 C5_12 135.6(3) . . ?
C11_12 Zr1_12 C5_12 97.2(4) . . ?
C1_12 Zr1_12 C5_12 32.3(3) . . ?
C2_12 Zr1_12 C5_12 53.0(3) . . ?
C3_12 Zr1_12 C5_12 52.6(3) . . ?
C4_12 Zr1_12 C5_12 31.5(3) . . ?
O1_12 Zr1_12 C8_12 85.3(2) . . ?
C11_12 Zr1_12 C8_12 122.4(3) . . ?
C1_12 Zr1_12 C8_12 102.3(3) . . ?
C2_12 Zr1_12 C8_12 115.1(3) . . ?
C3_12 Zr1_12 C8_12 147.0(3) . . ?
C4_12 Zr1_12 C8_12 151.8(4) . . ?
C5_12 Zr1_12 C8_12 120.4(4) . . ?
O1_12 Zr1_12 C7_12 114.5(2) . . ?
C11_12 Zr1_12 C7_12 126.7(3) . . ?
C1_12 Zr1_12 C7_12 78.5(3) . . ?
C2_12 Zr1_12 C7_12 103.3(3) . . ?
C3_12 Zr1_12 C7_12 131.7(3) . . ?
C4_12 Zr1_12 C7_12 120.3(4) . . ?
C5_12 Zr1_12 C7_12 89.0(4) . . ?
C8_12 Zr1_12 C7_12 32.2(2) . . ?
O1_12 Zr1_12 C6_12 136.6(2) . . ?
C11_12 Zr1_12 C6_12 96.0(3) . . ?
C1_12 Zr1_12 C6_12 90.1(4) . . ?
C2_12 Zr1_12 C6_12 121.7(3) . . ?
C3_12 Zr1_12 C6_12 135.4(3) . . ?
C4_12 Zr1_12 C6_12 108.0(3) . . ?
C5_12 Zr1_12 C6_12 82.8(3) . . ?
C8_12 Zr1_12 C6_12 53.2(3) . . ?
C7_12 Zr1_12 C6_12 32.2(2) . . ?
O1_12 Zr1_12 C9_12 86.0(2) . . ?
C11_12 Zr1_12 C9_12 90.2(3) . . ?
C1_12 Zr1_12 C9_12 131.4(3) . . ?
C2_12 Zr1_12 C9_12 146.7(3) . . ?
C3_12 Zr1_12 C9_12 171.7(3) . . ?
C4_12 Zr1_12 C9_12 155.7(3) . . ?
C5_12 Zr1_12 C9_12 135.6(3) . . ?
C8_12 Zr1_12 C9_12 32.2(2) . . ?
C7_12 Zr1_12 C9_12 53.2(3) . . ?
C6_12 Zr1_12 C9_12 52.8(3) . . ?
O1_12 Zr1_12 C10_12 115.4(2) . . ?
C11_12 Zr1_12 C10_12 75.2(3) . . ?
C1_12 Zr1_12 C10_12 121.7(4) . . ?
C2_12 Zr1_12 C10_12 153.3(3) . . ?
C3_12 Zr1_12 C10_12 155.4(3) . . ?
C4_12 Zr1_12 C10_12 123.9(3) . . ?
C5_12 Zr1_12 C10_12 108.8(3) . . ?
C8_12 Zr1_12 C10_12 53.1(3) . . ?
C7_12 Zr1_12 C10_12 53.0(3) . . ?
C6_12 Zr1_12 C10_12 31.7(2) . . ?
C9_12 Zr1_12 C10_12 31.9(2) . . ?
O4_12 Si1_12 O6_12 107.6(3) . . ?
O4_12 Si1_12 O5_12 112.9(3) . . ?
O6_12 Si1_12 O5_12 107.9(3) . . ?
O4_12 Si1_12 O2_12 109.3(3) . . ?
O6_12 Si1_12 O2_12 112.7(2) . . ?
O5_12 Si1_12 O2_12 106.6(2) . . ?
O9_12 Si2_12 O7_12 107.1(2) . . ?
O9_12 Si2_12 O3_12 108.9(3) . . ?
O7_12 Si2_12 O3_12 114.7(2) . . ?
O9_12 Si2_12 O8_12 113.5(3) . . ?
O7_12 Si2_12 O8_12 108.5(3) . . ?
O3_12 Si2_12 O8_12 104.3(2) . . ?
B1_12 O1_12 Zr1_12 153.6(4) . . ?
B1_12 O2_12 Si1_12 133.4(5) . . ?
B1_12 O3_12 Si2_12 138.1(5) . . ?
C12_12 O4_12 Si1_12 135.0(5) . . ?
C16_12 O5_12 Si1_12 132.9(5) . . ?
C20_12 O6_12 Si1_12 132.0(5) . . ?
C24_12 O7_12 Si2_12 130.0(4) . . ?
C28_12 O8_12 Si2_12 132.7(4) . . ?
C32_12 O9_12 Si2_12 135.4(4) . . ?
C2_12 C1_12 C5_12 107.2(10) . . ?
C2_12 C1_12 Zr1_12 74.0(5) . . ?
C5_12 C1_12 Zr1_12 74.2(6) . . ?
C1_12 C2_12 C3_12 107.7(10) . . ?
C1_12 C2_12 Zr1_12 73.9(5) . . ?
C3_12 C2_12 Zr1_12 74.0(5) . . ?
C4_12 C3_12 C2_12 108.0(10) . . ?
C4_12 C3_12 Zr1_12 74.3(5) . . ?
C2_12 C3_12 Zr1_12 73.7(4) . . ?
C5_12 C4_12 C3_12 108.9(10) . . ?
C5_12 C4_12 Zr1_12 74.3(5) . . ?
C3_12 C4_12 Zr1_12 74.0(5) . . ?
C4_12 C5_12 C1_12 108.3(10) . . ?
C4_12 C5_12 Zr1_12 74.3(5) . . ?
C1_12 C5_12 Zr1_12 73.5(5) . . ?
C10_12 C6_12 C7_12 108.8(8) . . ?
C10_12 C6_12 Zr1_12 75.4(5) . . ?
C7_12 C6_12 Zr1_12 73.7(4) . . ?
C8_12 C7_12 C6_12 107.5(8) . . ?
C8_12 C7_12 Zr1_12 73.7(4) . . ?
C6_12 C7_12 Zr1_12 74.1(4) . . ?
C7_12 C8_12 C9_12 107.9(7) . . ?
C7_12 C8_12 Zr1_12 74.1(4) . . ?
C9_12 C8_12 Zr1_12 74.5(4) . . ?
C10_12 C9_12 C8_12 108.1(8) . . ?
C10_12 C9_12 Zr1_12 75.1(4) . . ?
C8_12 C9_12 Zr1_12 73.3(4) . . ?
C6_12 C10_12 C9_12 107.7(8) . . ?
C6_12 C10_12 Zr1_12 72.9(4) . . ?
C9_12 C10_12 Zr1_12 73.0(4) . . ?
O4_12 C12_12 C15_12 109.1(7) . . ?
O4_12 C12_12 C13_12 104.9(7) . . ?
C15_12 C12_12 C13_12 113.1(8) . . ?
O4_12 C12_12 C14_12 109.1(7) . . ?
C15_12 C12_12 C14_12 109.5(7) . . ?
C13_12 C12_12 C14_12 111.0(8) . . ?
C19_12 C16_12 O5_12 109.1(8) . . ?
C19_12 C16_12 C18_12 113.5(11) . . ?
O5_12 C16_12 C18_12 105.8(7) . . ?
C19_12 C16_12 C17_12 113.8(10) . . ?
O5_12 C16_12 C17_12 111.0(7) . . ?
C18_12 C16_12 C17_12 103.2(10) . . ?
C22A_12 C20_12 O6_12 112.7(9) . . ?
C22A_12 C20_12 C22B_12 136.8(13) . . ?
O6_12 C20_12 C22B_12 110.2(10) . . ?
C22A_12 C20_12 C21B_12 45.4(9) . . ?
O6_12 C20_12 C21B_12 106.9(9) . . ?
C22B_12 C20_12 C21B_12 115.4(13) . . ?
C22A_12 C20_12 C21A_12 114.7(12) . . ?
O6_12 C20_12 C21A_12 102.8(9) . . ?
C22B_12 C20_12 C21A_12 59.4(10) . . ?
C21B_12 C20_12 C21A_12 149.2(12) . . ?
C22A_12 C20_12 C23B_12 61.9(10) . . ?
O6_12 C20_12 C23B_12 113.5(8) . . ?
C22B_12 C20_12 C23B_12 105.3(12) . . ?
C21B_12 C20_12 C23B_12 105.7(11) . . ?
C21A_12 C20_12 C23B_12 53.9(9) . . ?
C22A_12 C20_12 C23A_12 115.5(11) . . ?
O6_12 C20_12 C23A_12 104.0(8) . . ?
C22B_12 C20_12 C23A_12 46.6(9) . . ?
C21B_12 C20_12 C23A_12 74.4(10) . . ?
C21A_12 C20_12 C23A_12 105.9(10) . . ?
C23B_12 C20_12 C23A_12 140.2(10) . . ?
O7_12 C24_12 C26_12 109.7(6) . . ?
O7_12 C24_12 C25_12 103.6(6) . . ?
C26_12 C24_12 C25_12 110.9(7) . . ?
O7_12 C24_12 C27_12 109.2(6) . . ?
C26_12 C24_12 C27_12 112.9(8) . . ?
C25_12 C24_12 C27_12 110.2(7) . . ?
O8_12 C28_12 C31_12 109.4(7) . . ?
O8_12 C28_12 C30_12 112.6(6) . . ?
C31_12 C28_12 C30_12 111.0(8) . . ?
O8_12 C28_12 C29_12 104.6(6) . . ?
C31_12 C28_12 C29_12 109.9(7) . . ?
C30_12 C28_12 C29_12 109.2(7) . . ?
O9_12 C32_12 C33_12 108.8(6) . . ?
O9_12 C32_12 C34_12 106.1(6) . . ?
C33_12 C32_12 C34_12 111.0(6) . . ?
O9_12 C32_12 C35_12 110.0(6) . . ?
C33_12 C32_12 C35_12 110.2(6) . . ?
C34_12 C32_12 C35_12 110.6(6) . . ?
O1_12 B1_12 O2_12 123.3(7) . . ?
O1_12 B1_12 O3_12 117.6(7) . . ?
O2_12 B1_12 O3_12 119.0(7) . . ?
O1_13 Zr1_13 C11_13 98.8(3) . . ?
O1_13 Zr1_13 C7_13 111.0(3) . . ?
C11_13 Zr1_13 C7_13 128.5(4) . . ?
O1_13 Zr1_13 C9_13 89.0(4) . . ?
C11_13 Zr1_13 C9_13 88.6(5) . . ?
C7_13 Zr1_13 C9_13 52.6(3) . . ?
O1_13 Zr1_13 C1_13 110.3(3) . . ?
C11_13 Zr1_13 C1_13 127.7(3) . . ?
C7_13 Zr1_13 C1_13 80.1(4) . . ?
C9_13 Zr1_13 C1_13 132.7(4) . . ?
O1_13 Zr1_13 C8_13 84.3(3) . . ?
C11_13 Zr1_13 C8_13 121.3(5) . . ?
C7_13 Zr1_13 C8_13 31.2(3) . . ?
C9_13 Zr1_13 C8_13 32.7(4) . . ?
C1_13 Zr1_13 C8_13 104.5(5) . . ?
O1_13 Zr1_13 C4_13 121.1(4) . . ?
C11_13 Zr1_13 C4_13 77.3(4) . . ?
C7_13 Zr1_13 C4_13 116.6(5) . . ?
C9_13 Zr1_13 C4_13 148.2(6) . . ?
C1_13 Zr1_13 C4_13 50.5(4) . . ?
C8_13 Zr1_13 C4_13 147.7(5) . . ?
O1_13 Zr1_13 C3_13 88.8(5) . . ?
C11_13 Zr1_13 C3_13 85.8(4) . . ?
C7_13 Zr1_13 C3_13 133.8(4) . . ?
C9_13 Zr1_13 C3_13 173.6(5) . . ?
C1_13 Zr1_13 C3_13 53.6(4) . . ?
C8_13 Zr1_13 C3_13 152.7(5) . . ?
C4_13 Zr1_13 C3_13 32.6(4) . . ?
O1_13 Zr1_13 C2_13 83.7(3) . . ?
C11_13 Zr1_13 C2_13 118.8(4) . . ?
C7_13 Zr1_13 C2_13 105.7(4) . . ?
C9_13 Zr1_13 C2_13 152.4(5) . . ?
C1_13 Zr1_13 C2_13 31.7(3) . . ?
C8_13 Zr1_13 C2_13 119.9(5) . . ?
C4_13 Zr1_13 C2_13 51.9(4) . . ?
C3_13 Zr1_13 C2_13 33.0(4) . . ?
O1_13 Zr1_13 C6_13 135.6(3) . . ?
C11_13 Zr1_13 C6_13 100.0(4) . . ?
C7_13 Zr1_13 C6_13 31.1(3) . . ?
C9_13 Zr1_13 C6_13 51.9(3) . . ?
C1_13 Zr1_13 C6_13 88.7(4) . . ?
C8_13 Zr1_13 C6_13 51.7(3) . . ?
C4_13 Zr1_13 C6_13 102.2(5) . . ?
C3_13 Zr1_13 C6_13 132.3(5) . . ?
C2_13 Zr1_13 C6_13 120.2(4) . . ?
O1_13 Zr1_13 C10_13 120.4(4) . . ?
C11_13 Zr1_13 C10_13 77.4(4) . . ?
C7_13 Zr1_13 C10_13 51.5(4) . . ?
C9_13 Zr1_13 C10_13 32.3(4) . . ?
C1_13 Zr1_13 C10_13 118.5(4) . . ?
C8_13 Zr1_13 C10_13 52.8(4) . . ?
C4_13 Zr1_13 C10_13 116.0(5) . . ?
C3_13 Zr1_13 C10_13 148.0(6) . . ?
C2_13 Zr1_13 C10_13 150.1(5) . . ?
C6_13 Zr1_13 C10_13 30.2(3) . . ?
O1_13 Zr1_13 C5_13 137.3(4) . . ?
C11_13 Zr1_13 C5_13 99.3(4) . . ?
C7_13 Zr1_13 C5_13 86.5(4) . . ?
C9_13 Zr1_13 C5_13 129.8(4) . . ?
C1_13 Zr1_13 C5_13 32.2(3) . . ?
C8_13 Zr1_13 C5_13 117.5(5) . . ?
C4_13 Zr1_13 C5_13 30.3(3) . . ?
C3_13 Zr1_13 C5_13 54.5(4) . . ?
C2_13 Zr1_13 C5_13 53.6(4) . . ?
C6_13 Zr1_13 C5_13 77.9(4) . . ?
C10_13 Zr1_13 C5_13 101.3(5) . . ?
O2_13 Si1_13 O6_13 111.5(5) . . ?
O2_13 Si1_13 O5B_13 126.0(8) . . ?
O6_13 Si1_13 O5B_13 103.2(7) . . ?
O2_13 Si1_13 O4_13 111.9(4) . . ?
O6_13 Si1_13 O4_13 104.9(4) . . ?
O5B_13 Si1_13 O4_13 96.8(7) . . ?
O2_13 Si1_13 O5A_13 95.4(6) . . ?
O6_13 Si1_13 O5A_13 113.1(6) . . ?
O5B_13 Si1_13 O5A_13 31.6(7) . . ?
O4_13 Si1_13 O5A_13 120.0(6) . . ?
O7B_13 Si2_13 O3_13 113.1(8) . . ?
O7B_13 Si2_13 O8A_13 67.3(8) . . ?
O3_13 Si2_13 O8A_13 118.8(5) . . ?
O7B_13 Si2_13 O9B_13 108.5(10) . . ?
O3_13 Si2_13 O9B_13 112.8(7) . . ?
O8A_13 Si2_13 O9B_13 125.0(7) . . ?
O7B_13 Si2_13 O7A_13 44.0(7) . . ?
O3_13 Si2_13 O7A_13 107.8(5) . . ?
O8A_13 Si2_13 O7A_13 107.7(6) . . ?
O9B_13 Si2_13 O7A_13 71.4(7) . . ?
O7B_13 Si2_13 O9A_13 137.2(8) . . ?
O3_13 Si2_13 O9A_13 101.7(4) . . ?
O8A_13 Si2_13 O9A_13 116.7(5) . . ?
O9B_13 Si2_13 O9A_13 31.4(6) . . ?
O7A_13 Si2_13 O9A_13 102.7(6) . . ?
O7B_13 Si2_13 O8B_13 102.2(10) . . ?
O3_13 Si2_13 O8B_13 107.5(7) . . ?
O8A_13 Si2_13 O8B_13 34.9(6) . . ?
O9B_13 Si2_13 O8B_13 112.2(9) . . ?
O7A_13 Si2_13 O8B_13 139.0(8) . . ?
O9A_13 Si2_13 O8B_13 89.8(8) . . ?
B1_13 O1_13 Zr1_13 160.5(6) . . ?
B1_13 O2_13 Si1_13 164.0(8) . . ?
B1_13 O3_13 Si2_13 145.2(8) . . ?
C12_13 O4_13 Si1_13 136.3(6) . . ?
C16_13 O5A_13 Si1_13 126.9(12) . . ?
C16_13 O5B_13 Si1_13 133.9(13) . . ?
C20_13 O6_13 Si1_13 140.8(8) . . ?
C24_13 O7A_13 Si2_13 125.8(9) . . ?
C28_13 O8A_13 Si2_13 131.1(8) . . ?
C32_13 O9A_13 Si2_13 128.5(8) . . ?
Si2_13 O7B_13 C24_13 138.9(14) . . ?
C28_13 O8B_13 Si2_13 133.4(15) . . ?
C32_13 O9B_13 Si2_13 133.5(13) . . ?
C2_13 C1_13 C5_13 111.3(11) . . ?
C2_13 C1_13 Zr1_13 75.0(6) . . ?
C5_13 C1_13 Zr1_13 76.1(6) . . ?
C1_13 C2_13 C3_13 108.0(12) . . ?
C1_13 C2_13 Zr1_13 73.4(5) . . ?
C3_13 C2_13 Zr1_13 73.6(6) . . ?
C4_13 C3_13 C2_13 101.6(11) . . ?
C4_13 C3_13 Zr1_13 73.4(6) . . ?
C2_13 C3_13 Zr1_13 73.5(6) . . ?
C5_13 C4_13 C3_13 115.9(14) . . ?
C5_13 C4_13 Zr1_13 76.6(7) . . ?
C3_13 C4_13 Zr1_13 73.9(7) . . ?
C4_13 C5_13 C1_13 103.1(13) . . ?
C4_13 C5_13 Zr1_13 73.1(7) . . ?
C1_13 C5_13 Zr1_13 71.7(6) . . ?
C10_13 C6_13 C7_13 110.0(11) . . ?
C10_13 C6_13 Zr1_13 75.1(6) . . ?
C7_13 C6_13 Zr1_13 73.1(6) . . ?
C6_13 C7_13 C8_13 109.5(11) . . ?
C6_13 C7_13 Zr1_13 75.8(6) . . ?
C8_13 C7_13 Zr1_13 75.5(6) . . ?
C7_13 C8_13 C9_13 106.4(11) . . ?
C7_13 C8_13 Zr1_13 73.2(6) . . ?
C9_13 C8_13 Zr1_13 73.0(6) . . ?
C10_13 C9_13 C8_13 106.0(10) . . ?
C10_13 C9_13 Zr1_13 74.9(6) . . ?
C8_13 C9_13 Zr1_13 74.4(6) . . ?
C6_13 C10_13 C9_13 108.0(12) . . ?
C6_13 C10_13 Zr1_13 74.6(6) . . ?
C9_13 C10_13 Zr1_13 72.7(6) . . ?
O4_13 C12_13 C14_13 110.5(7) . . ?
O4_13 C12_13 C13_13 106.0(8) . . ?
C14_13 C12_13 C13_13 107.8(8) . . ?
O4_13 C12_13 C15_13 112.2(8) . . ?
C14_13 C12_13 C15_13 111.0(8) . . ?
C13_13 C12_13 C15_13 109.1(8) . . ?
C19_13 C16_13 O5A_13 97.1(11) . . ?
C19_13 C16_13 C17_13 111.7(14) . . ?
O5A_13 C16_13 C17_13 124.9(11) . . ?
C19_13 C16_13 C18_13 112.8(12) . . ?
O5A_13 C16_13 C18_13 95.8(12) . . ?
C17_13 C16_13 C18_13 112.9(11) . . ?
C19_13 C16_13 O5B_13 122.9(13) . . ?
O5A_13 C16_13 O5B_13 34.5(8) . . ?
C17_13 C16_13 O5B_13 91.8(11) . . ?
C18_13 C16_13 O5B_13 103.0(12) . . ?
O6_13 C20_13 C22_13 107.6(10) . . ?
O6_13 C20_13 C23_13 109.2(12) . . ?
C22_13 C20_13 C23_13 113.7(15) . . ?
O6_13 C20_13 C21_13 104.2(11) . . ?
C22_13 C20_13 C21_13 110.3(12) . . ?
C23_13 C20_13 C21_13 111.3(13) . . ?
C25_13 C24_13 C27_13 114.1(10) . . ?
C25_13 C24_13 C26_13 117.3(12) . . ?
C27_13 C24_13 C26_13 110.1(9) . . ?
C25_13 C24_13 O7B_13 98.7(11) . . ?
C27_13 C24_13 O7B_13 127.8(13) . . ?
C26_13 C24_13 O7B_13 86.7(10) . . ?
C25_13 C24_13 O7A_13 111.0(10) . . ?
C27_13 C24_13 O7A_13 84.8(10) . . ?
C26_13 C24_13 O7A_13 115.3(10) . . ?
O7B_13 C24_13 O7A_13 44.7(7) . . ?
O8B_13 C28_13 C30_13 86.3(12) . . ?
O8B_13 C28_13 C29_13 116.0(13) . . ?
C30_13 C28_13 C29_13 112.2(11) . . ?
O8B_13 C28_13 O8A_13 39.3(8) . . ?
C30_13 C28_13 O8A_13 125.6(11) . . ?
C29_13 C28_13 O8A_13 97.5(10) . . ?
O8B_13 C28_13 C31_13 116.7(12) . . ?
C30_13 C28_13 C31_13 112.5(11) . . ?
C29_13 C28_13 C31_13 110.9(11) . . ?
O8A_13 C28_13 C31_13 96.4(9) . . ?
O9B_13 C32_13 O9A_13 35.6(7) . . ?
O9B_13 C32_13 C33_13 128.8(11) . . ?
O9A_13 C32_13 C33_13 94.5(9) . . ?
O9B_13 C32_13 C34_13 104.0(9) . . ?
O9A_13 C32_13 C34_13 113.9(8) . . ?
C33_13 C32_13 C34_13 110.1(9) . . ?
O9B_13 C32_13 C35_13 92.5(11) . . ?
O9A_13 C32_13 C35_13 118.2(9) . . ?
C33_13 C32_13 C35_13 110.9(9) . . ?
C34_13 C32_13 C35_13 108.5(8) . . ?
O1_13 B1_13 O2_13 122.3(9) . . ?
O1_13 B1_13 O3_13 124.5(10) . . ?
O2_13 B1_13 O3_13 113.1(9) . . ?
O1_14 Zr1_14 C11_14 97.3(2) . . ?
O1_14 Zr1_14 C1_14 112.4(3) . . ?
C11_14 Zr1_14 C1_14 128.8(3) . . ?
O1_14 Zr1_14 C2_14 84.3(3) . . ?
C11_14 Zr1_14 C2_14 121.6(3) . . ?
C1_14 Zr1_14 C2_14 32.3(3) . . ?
O1_14 Zr1_14 C9_14 85.1(3) . . ?
C11_14 Zr1_14 C9_14 90.1(4) . . ?
C1_14 Zr1_14 C9_14 131.4(3) . . ?
C2_14 Zr1_14 C9_14 147.6(3) . . ?
O1_14 Zr1_14 C7_14 113.8(2) . . ?
C11_14 Zr1_14 C7_14 126.4(3) . . ?
C1_14 Zr1_14 C7_14 78.9(3) . . ?
C2_14 Zr1_14 C7_14 104.7(3) . . ?
C9_14 Zr1_14 C7_14 53.0(3) . . ?
O1_14 Zr1_14 C8_14 84.3(2) . . ?
C11_14 Zr1_14 C8_14 122.1(3) . . ?
C1_14 Zr1_14 C8_14 102.2(3) . . ?
C2_14 Zr1_14 C8_14 116.1(3) . . ?
C9_14 Zr1_14 C8_14 32.1(2) . . ?
C7_14 Zr1_14 C8_14 32.3(2) . . ?
O1_14 Zr1_14 C3_14 87.4(3) . . ?
C11_14 Zr1_14 C3_14 89.7(4) . . ?
C1_14 Zr1_14 C3_14 53.2(3) . . ?
C2_14 Zr1_14 C3_14 32.0(3) . . ?
C9_14 Zr1_14 C3_14 172.4(3) . . ?
C7_14 Zr1_14 C3_14 132.1(3) . . ?
C8_14 Zr1_14 C3_14 147.9(3) . . ?
O1_14 Zr1_14 C5_14 136.7(3) . . ?
C11_14 Zr1_14 C5_14 98.8(3) . . ?
C1_14 Zr1_14 C5_14 32.2(3) . . ?
C2_14 Zr1_14 C5_14 53.1(3) . . ?
C9_14 Zr1_14 C5_14 134.6(3) . . ?
C7_14 Zr1_14 C5_14 87.7(3) . . ?
C8_14 Zr1_14 C5_14 119.0(3) . . ?
C3_14 Zr1_14 C5_14 52.9(3) . . ?
O1_14 Zr1_14 C10_14 114.8(3) . . ?
C11_14 Zr1_14 C10_14 74.9(3) . . ?
C1_14 Zr1_14 C10_14 122.3(3) . . ?
C2_14 Zr1_14 C10_14 154.3(3) . . ?
C9_14 Zr1_14 C10_14 32.1(3) . . ?
C7_14 Zr1_14 C10_14 52.9(3) . . ?
C8_14 Zr1_14 C10_14 53.3(3) . . ?
C3_14 Zr1_14 C10_14 154.1(3) . . ?
C5_14 Zr1_14 C10_14 108.2(3) . . ?
O1_14 Zr1_14 C6_14 135.8(3) . . ?
C11_14 Zr1_14 C6_14 96.0(3) . . ?
C1_14 Zr1_14 C6_14 90.5(3) . . ?
C2_14 Zr1_14 C6_14 122.5(3) . . ?
C9_14 Zr1_14 C6_14 52.9(3) . . ?
C7_14 Zr1_14 C6_14 31.9(2) . . ?
C8_14 Zr1_14 C6_14 53.3(3) . . ?
C3_14 Zr1_14 C6_14 134.6(3) . . ?
C5_14 Zr1_14 C6_14 81.8(3) . . ?
C10_14 Zr1_14 C6_14 31.8(2) . . ?
O1_14 Zr1_14 C4_14 118.0(3) . . ?
C11_14 Zr1_14 C4_14 76.5(3) . . ?
C1_14 Zr1_14 C4_14 53.1(3) . . ?
C2_14 Zr1_14 C4_14 53.1(3) . . ?
C9_14 Zr1_14 C4_14 154.3(3) . . ?
C7_14 Zr1_14 C4_14 118.9(3) . . ?
C8_14 Zr1_14 C4_14 150.6(3) . . ?
C3_14 Zr1_14 C4_14 32.3(2) . . ?
C5_14 Zr1_14 C4_14 31.6(3) . . ?
C10_14 Zr1_14 C4_14 122.2(3) . . ?
C6_14 Zr1_14 C4_14 106.1(3) . . ?
O6_14 Si1_14 O4_14 108.1(3) . . ?
O6_14 Si1_14 O2_14 113.0(3) . . ?
O4_14 Si1_14 O2_14 108.5(3) . . ?
O6_14 Si1_14 O5_14 107.5(2) . . ?
O4_14 Si1_14 O5_14 112.2(3) . . ?
O2_14 Si1_14 O5_14 107.6(3) . . ?
O7_14 Si2_14 O9_14 108.6(3) . . ?
O7_14 Si2_14 O8_14 107.6(3) . . ?
O9_14 Si2_14 O8_14 112.1(3) . . ?
O7_14 Si2_14 O3_14 114.7(3) . . ?
O9_14 Si2_14 O3_14 108.2(3) . . ?
O8_14 Si2_14 O3_14 105.7(3) . . ?
B1_14 O1_14 Zr1_14 169.1(6) . . ?
B1_14 O2_14 Si1_14 138.0(5) . . ?
B1_14 O3_14 Si2_14 142.6(5) . . ?
C12_14 O4_14 Si1_14 131.5(6) . . ?
C16_14 O5_14 Si1_14 129.9(5) . . ?
C20_14 O6_14 Si1_14 135.7(5) . . ?
C24_14 O7_14 Si2_14 132.8(6) . . ?
C28_14 O8_14 Si2_14 132.6(5) . . ?
C32_14 O9_14 Si2_14 134.2(5) . . ?
C2_14 C1_14 C5_14 107.9(8) . . ?
C2_14 C1_14 Zr1_14 74.2(5) . . ?
C5_14 C1_14 Zr1_14 75.3(5) . . ?
C3_14 C2_14 C1_14 108.3(8) . . ?
C3_14 C2_14 Zr1_14 75.0(6) . . ?
C1_14 C2_14 Zr1_14 73.5(5) . . ?
C2_14 C3_14 C4_14 108.0(8) . . ?
C2_14 C3_14 Zr1_14 73.0(5) . . ?
C4_14 C3_14 Zr1_14 75.0(5) . . ?
C5_14 C4_14 C3_14 107.2(8) . . ?
C5_14 C4_14 Zr1_14 73.1(5) . . ?
C3_14 C4_14 Zr1_14 72.7(5) . . ?
C4_14 C5_14 C1_14 108.7(8) . . ?
C4_14 C5_14 Zr1_14 75.3(5) . . ?
C1_14 C5_14 Zr1_14 72.5(5) . . ?
C7_14 C6_14 C10_14 107.9(8) . . ?
C7_14 C6_14 Zr1_14 73.0(4) . . ?
C10_14 C6_14 Zr1_14 74.1(5) . . ?
C6_14 C7_14 C8_14 108.9(8) . . ?
C6_14 C7_14 Zr1_14 75.0(5) . . ?
C8_14 C7_14 Zr1_14 74.4(4) . . ?
C9_14 C8_14 C7_14 106.5(8) . . ?
C9_14 C8_14 Zr1_14 73.3(5) . . ?
C7_14 C8_14 Zr1_14 73.2(4) . . ?
C8_14 C9_14 C10_14 109.0(8) . . ?
C8_14 C9_14 Zr1_14 74.6(5) . . ?
C10_14 C9_14 Zr1_14 74.9(5) . . ?
C6_14 C10_14 C9_14 107.6(8) . . ?
C6_14 C10_14 Zr1_14 74.1(5) . . ?
C9_14 C10_14 Zr1_14 72.9(5) . . ?
O4_14 C12_14 C14_14 111.7(8) . . ?
O4_14 C12_14 C13_14 105.0(8) . . ?
C14_14 C12_14 C13_14 110.0(10) . . ?
O4_14 C12_14 C15_14 106.1(9) . . ?
C14_14 C12_14 C15_14 112.0(9) . . ?
C13_14 C12_14 C15_14 111.8(9) . . ?
O5_14 C16_14 C19_14 107.9(6) . . ?
O5_14 C16_14 C17_14 109.8(7) . . ?
C19_14 C16_14 C17_14 111.7(8) . . ?
O5_14 C16_14 C18_14 105.0(7) . . ?
C19_14 C16_14 C18_14 112.2(8) . . ?
C17_14 C16_14 C18_14 109.9(8) . . ?
O6_14 C20_14 C21A_14 108.6(12) . . ?
O6_14 C20_14 C23_14 107.4(8) . . ?
C21A_14 C20_14 C23_14 93.5(13) . . ?
O6_14 C20_14 C22_14 106.5(7) . . ?
C21A_14 C20_14 C22_14 131.8(13) . . ?
C23_14 C20_14 C22_14 106.4(10) . . ?
O6_14 C20_14 C21B_14 112.0(9) . . ?
C21A_14 C20_14 C21B_14 40.4(11) . . ?
C23_14 C20_14 C21B_14 126.5(11) . . ?
C22_14 C20_14 C21B_14 95.7(10) . . ?
O7_14 C24_14 C25_14 103.9(8) . . ?
O7_14 C24_14 C27_14 109.8(7) . . ?
C25_14 C24_14 C27_14 112.4(9) . . ?
O7_14 C24_14 C26_14 108.9(8) . . ?
C25_14 C24_14 C26_14 109.8(8) . . ?
C27_14 C24_14 C26_14 111.8(9) . . ?
O8_14 C28_14 C30_14 112.4(8) . . ?
O8_14 C28_14 C29_14 105.5(7) . . ?
C30_14 C28_14 C29_14 115.8(10) . . ?
O8_14 C28_14 C31_14 107.1(8) . . ?
C30_14 C28_14 C31_14 107.4(10) . . ?
C29_14 C28_14 C31_14 108.3(10) . . ?
O9_14 C32_14 C35_14 111.0(8) . . ?
O9_14 C32_14 C33_14 108.9(7) . . ?
C35_14 C32_14 C33_14 110.7(8) . . ?
O9_14 C32_14 C34_14 105.6(7) . . ?
C35_14 C32_14 C34_14 111.6(8) . . ?
C33_14 C32_14 C34_14 108.9(8) . . ?
O1_14 B1_14 O2_14 124.1(7) . . ?
O1_14 B1_14 O3_14 116.4(7) . . ?
O2_14 B1_14 O3_14 119.5(7) . . ?
O1_15 Zr1_15 C11_15 98.9(2) . . ?
O1_15 Zr1_15 C8_15 86.9(3) . . ?
C11_15 Zr1_15 C8_15 123.8(4) . . ?
O1_15 Zr1_15 C2_15 83.3(2) . . ?
C11_15 Zr1_15 C2_15 124.4(3) . . ?
C8_15 Zr1_15 C2_15 111.9(4) . . ?
O1_15 Zr1_15 C4_15 111.9(3) . . ?
C11_15 Zr1_15 C4_15 75.4(3) . . ?
C8_15 Zr1_15 C4_15 151.9(4) . . ?
C2_15 Zr1_15 C4_15 53.5(3) . . ?
O1_15 Zr1_15 C9_15 88.5(3) . . ?
C11_15 Zr1_15 C9_15 90.7(5) . . ?
C8_15 Zr1_15 C9_15 33.2(3) . . ?
C2_15 Zr1_15 C9_15 144.8(5) . . ?
C4_15 Zr1_15 C9_15 156.6(4) . . ?
O1_15 Zr1_15 C5_15 134.3(2) . . ?
C11_15 Zr1_15 C5_15 94.7(3) . . ?
C8_15 Zr1_15 C5_15 120.2(4) . . ?
C2_15 Zr1_15 C5_15 53.6(3) . . ?
C4_15 Zr1_15 C5_15 32.1(2) . . ?
C9_15 Zr1_15 C5_15 134.9(4) . . ?
O1_15 Zr1_15 C6_15 138.3(4) . . ?
C11_15 Zr1_15 C6_15 98.4(4) . . ?
C8_15 Zr1_15 C6_15 52.1(4) . . ?
C2_15 Zr1_15 C6_15 116.3(4) . . ?
C4_15 Zr1_15 C6_15 109.1(4) . . ?
C9_15 Zr1_15 C6_15 53.7(4) . . ?
C5_15 Zr1_15 C6_15 81.2(4) . . ?
O1_15 Zr1_15 C1_15 113.2(2) . . ?
C11_15 Zr1_15 C1_15 126.2(3) . . ?
C8_15 Zr1_15 C1_15 100.8(4) . . ?
C2_15 Zr1_15 C1_15 32.1(2) . . ?
C4_15 Zr1_15 C1_15 53.3(3) . . ?
C9_15 Zr1_15 C1_15 130.2(4) . . ?
C5_15 Zr1_15 C1_15 32.5(3) . . ?
C6_15 Zr1_15 C1_15 85.5(5) . . ?
O1_15 Zr1_15 C7_15 114.4(4) . . ?
C11_15 Zr1_15 C7_15 128.0(4) . . ?
C8_15 Zr1_15 C7_15 31.3(3) . . ?
C2_15 Zr1_15 C7_15 99.1(4) . . ?
C4_15 Zr1_15 C7_15 121.4(4) . . ?
C9_15 Zr1_15 C7_15 53.8(5) . . ?
C5_15 Zr1_15 C7_15 89.4(4) . . ?
C6_15 Zr1_15 C7_15 31.2(3) . . ?
C1_15 Zr1_15 C7_15 76.4(4) . . ?
O1_15 Zr1_15 C3_15 82.9(3) . . ?
C11_15 Zr1_15 C3_15 92.3(3) . . ?
C8_15 Zr1_15 C3_15 143.7(4) . . ?
C2_15 Zr1_15 C3_15 32.4(2) . . ?
C4_15 Zr1_15 C3_15 31.9(2) . . ?
C9_15 Zr1_15 C3_15 171.2(4) . . ?
C5_15 Zr1_15 C3_15 53.1(3) . . ?
C6_15 Zr1_15 C3_15 133.8(4) . . ?
C1_15 Zr1_15 C3_15 53.2(3) . . ?
C7_15 Zr1_15 C3_15 128.9(4) . . ?
O1_15 Zr1_15 C10_15 119.7(3) . . ?
C11_15 Zr1_15 C10_15 77.1(4) . . ?
C8_15 Zr1_15 C10_15 53.0(4) . . ?
C2_15 Zr1_15 C10_15 147.7(4) . . ?
C4_15 Zr1_15 C10_15 124.1(4) . . ?
C9_15 Zr1_15 C10_15 32.8(3) . . ?
C5_15 Zr1_15 C10_15 105.8(4) . . ?
C6_15 Zr1_15 C10_15 31.5(3) . . ?
C1_15 Zr1_15 C10_15 116.7(4) . . ?
C7_15 Zr1_15 C10_15 52.2(4) . . ?
C3_15 Zr1_15 C10_15 156.0(4) . . ?
O4_15 Si1_15 O2_15 109.1(2) . . ?
O4_15 Si1_15 O6_15 108.3(3) . . ?
O2_15 Si1_15 O6_15 112.2(3) . . ?
O4_15 Si1_15 O5_15 113.1(3) . . ?
O2_15 Si1_15 O5_15 106.3(3) . . ?
O6_15 Si1_15 O5_15 107.8(3) . . ?
O7B_15 Si2_15 O9_15 124.1(4) . . ?
O7B_15 Si2_15 O3_15 113.4(4) . . ?
O9_15 Si2_15 O3_15 109.5(3) . . ?
O7B_15 Si2_15 O8A_15 61.2(5) . . ?
O9_15 Si2_15 O8A_15 126.0(4) . . ?
O3_15 Si2_15 O8A_15 115.2(4) . . ?
O7B_15 Si2_15 O8B_15 108.4(5) . . ?
O9_15 Si2_15 O8B_15 92.3(5) . . ?
O3_15 Si2_15 O8B_15 105.6(4) . . ?
O8A_15 Si2_15 O8B_15 48.1(4) . . ?
O7B_15 Si2_15 O7A_15 42.4(4) . . ?
O9_15 Si2_15 O7A_15 94.3(4) . . ?
O3_15 Si2_15 O7A_15 103.5(4) . . ?
O8A_15 Si2_15 O7A_15 102.9(5) . . ?
O8B_15 Si2_15 O7A_15 146.0(5) . . ?
B1_15 O1_15 Zr1_15 155.6(5) . . ?
B1_15 O2_15 Si1_15 149.5(5) . . ?
B1_15 O3_15 Si2_15 148.8(5) . . ?
C12_15 O4_15 Si1_15 135.7(4) . . ?
C16_15 O5_15 Si1_15 131.9(4) . . ?
C20_15 O6_15 Si1_15 133.0(4) . . ?
C24_15 O7A_15 Si2_15 128.6(8) . . ?
C28_15 O8A_15 Si2_15 122.8(7) . . ?
C24_15 O7B_15 Si2_15 131.3(7) . . ?
C28_15 O8B_15 Si2_15 125.0(8) . . ?
C32_15 O9_15 Si2_15 135.9(5) . . ?
C2_15 C1_15 C5_15 108.0(8) . . ?
C2_15 C1_15 Zr1_15 73.4(4) . . ?
C5_15 C1_15 Zr1_15 73.7(4) . . ?
C1_15 C2_15 C3_15 107.8(8) . . ?
C1_15 C2_15 Zr1_15 74.5(4) . . ?
C3_15 C2_15 Zr1_15 74.7(5) . . ?
C4_15 C3_15 C2_15 107.8(8) . . ?
C4_15 C3_15 Zr1_15 73.3(5) . . ?
C2_15 C3_15 Zr1_15 72.8(4) . . ?
C3_15 C4_15 C5_15 108.8(9) . . ?
C3_15 C4_15 Zr1_15 74.8(5) . . ?
C5_15 C4_15 Zr1_15 74.3(5) . . ?
C4_15 C5_15 C1_15 107.5(8) . . ?
C4_15 C5_15 Zr1_15 73.6(4) . . ?
C1_15 C5_15 Zr1_15 73.8(5) . . ?
C7_15 C6_15 C10_15 109.3(14) . . ?
C7_15 C6_15 Zr1_15 74.6(6) . . ?
C10_15 C6_15 Zr1_15 74.9(6) . . ?
C8_15 C7_15 C6_15 108.3(14) . . ?
C8_15 C7_15 Zr1_15 72.6(6) . . ?
C6_15 C7_15 Zr1_15 74.1(6) . . ?
C7_15 C8_15 C9_15 110.1(12) . . ?
C7_15 C8_15 Zr1_15 76.0(6) . . ?
C9_15 C8_15 Zr1_15 74.5(6) . . ?
C10_15 C9_15 C8_15 103.5(11) . . ?
C10_15 C9_15 Zr1_15 74.6(6) . . ?
C8_15 C9_15 Zr1_15 72.3(5) . . ?
C6_15 C10_15 C9_15 108.7(12) . . ?
C6_15 C10_15 Zr1_15 73.6(6) . . ?
C9_15 C10_15 Zr1_15 72.7(5) . . ?
O4_15 C12_15 C14_15 110.8(6) . . ?
O4_15 C12_15 C15_15 107.7(6) . . ?
C14_15 C12_15 C15_15 111.8(6) . . ?
O4_15 C12_15 C13_15 105.1(6) . . ?
C14_15 C12_15 C13_15 109.7(6) . . ?
C15_15 C12_15 C13_15 111.5(7) . . ?
O5_15 C16_15 C18_15 105.9(6) . . ?
O5_15 C16_15 C17_15 112.7(6) . . ?
C18_15 C16_15 C17_15 110.5(7) . . ?
O5_15 C16_15 C19_15 105.8(6) . . ?
C18_15 C16_15 C19_15 110.3(7) . . ?
C17_15 C16_15 C19_15 111.4(7) . . ?
O6_15 C20_15 C21_15 110.2(7) . . ?
O6_15 C20_15 C23_15 107.3(6) . . ?
C21_15 C20_15 C23_15 109.8(7) . . ?
O6_15 C20_15 C22_15 108.6(6) . . ?
C21_15 C20_15 C22_15 112.8(8) . . ?
C23_15 C20_15 C22_15 107.9(7) . . ?
O7A_15 C24_15 C27_15 84.9(9) . . ?
O7A_15 C24_15 C25_15 119.5(7) . . ?
C27_15 C24_15 C25_15 111.5(8) . . ?
O7A_15 C24_15 C26_15 113.4(8) . . ?
C27_15 C24_15 C26_15 108.9(8) . . ?
C25_15 C24_15 C26_15 114.4(8) . . ?
O7A_15 C24_15 O7B_15 46.0(5) . . ?
C27_15 C24_15 O7B_15 130.9(10) . . ?
C25_15 C24_15 O7B_15 96.5(7) . . ?
C26_15 C24_15 O7B_15 93.6(7) . . ?
C29_15 C28_15 O8B_15 82.9(9) . . ?
C29_15 C28_15 C30_15 110.6(10) . . ?
O8B_15 C28_15 C30_15 118.5(9) . . ?
C29_15 C28_15 C31_15 110.0(9) . . ?
O8B_15 C28_15 C31_15 118.3(9) . . ?
C30_15 C28_15 C31_15 112.3(10) . . ?
C29_15 C28_15 O8A_15 134.6(11) . . ?
O8B_15 C28_15 O8A_15 51.8(6) . . ?
C30_15 C28_15 O8A_15 95.6(8) . . ?
C31_15 C28_15 O8A_15 92.0(8) . . ?
O9_15 C32_15 C35_15 108.8(9) . . ?
O9_15 C32_15 C33_15 106.3(7) . . ?
C35_15 C32_15 C33_15 110.9(9) . . ?
O9_15 C32_15 C34_15 111.6(8) . . ?
C35_15 C32_15 C34_15 111.4(9) . . ?
C33_15 C32_15 C34_15 107.7(9) . . ?
O1_15 B1_15 O2_15 123.3(7) . . ?
O1_15 B1_15 O3_15 122.3(7) . . ?
O2_15 B1_15 O3_15 114.4(7) . . ?
O1_16 Zr1_16 C11_16 97.7(2) . . ?
O1_16 Zr1_16 C1_16 115.3(4) . . ?
C11_16 Zr1_16 C1_16 125.7(4) . . ?
O1_16 Zr1_16 C5_16 136.5(3) . . ?
C11_16 Zr1_16 C5_16 94.5(6) . . ?
C1_16 Zr1_16 C5_16 32.4(4) . . ?
O1_16 Zr1_16 C2_16 85.9(3) . . ?
C11_16 Zr1_16 C2_16 125.6(3) . . ?
C1_16 Zr1_16 C2_16 31.0(3) . . ?
C5_16 Zr1_16 C2_16 53.7(4) . . ?
O1_16 Zr1_16 C9_16 87.0(2) . . ?
C11_16 Zr1_16 C9_16 88.9(3) . . ?
C1_16 Zr1_16 C9_16 132.1(3) . . ?
C5_16 Zr1_16 C9_16 135.0(4) . . ?
C2_16 Zr1_16 C9_16 145.4(3) . . ?
O1_16 Zr1_16 C8_16 83.4(2) . . ?
C11_16 Zr1_16 C8_16 120.8(3) . . ?
C1_16 Zr1_16 C8_16 105.5(4) . . ?
C5_16 Zr1_16 C8_16 124.5(5) . . ?
C2_16 Zr1_16 C8_16 113.5(3) . . ?
C9_16 Zr1_16 C8_16 31.9(2) . . ?
O1_16 Zr1_16 C7_16 111.3(3) . . ?
C11_16 Zr1_16 C7_16 128.3(3) . . ?
C1_16 Zr1_16 C7_16 79.3(3) . . ?
C5_16 Zr1_16 C7_16 92.5(5) . . ?
C2_16 Zr1_16 C7_16 99.1(3) . . ?
C9_16 Zr1_16 C7_16 52.8(3) . . ?
C8_16 Zr1_16 C7_16 32.1(2) . . ?
O1_16 Zr1_16 C4_16 110.9(5) . . ?
C11_16 Zr1_16 C4_16 77.3(4) . . ?
C1_16 Zr1_16 C4_16 51.7(5) . . ?
C5_16 Zr1_16 C4_16 33.0(4) . . ?
C2_16 Zr1_16 C4_16 51.7(4) . . ?
C9_16 Zr1_16 C4_16 158.5(4) . . ?
C8_16 Zr1_16 C4_16 156.3(4) . . ?
C7_16 Zr1_16 C4_16 125.2(5) . . ?
O1_16 Zr1_16 C6_16 136.0(3) . . ?
C11_16 Zr1_16 C6_16 99.0(3) . . ?
C1_16 Zr1_16 C6_16 86.4(4) . . ?
C5_16 Zr1_16 C6_16 82.2(4) . . ?
C2_16 Zr1_16 C6_16 115.4(4) . . ?
C9_16 Zr1_16 C6_16 53.0(3) . . ?
C8_16 Zr1_16 C6_16 53.2(3) . . ?
C7_16 Zr1_16 C6_16 31.9(3) . . ?
C4_16 Zr1_16 C6_16 112.4(5) . . ?
O1_16 Zr1_16 C10_16 117.5(3) . . ?
C11_16 Zr1_16 C10_16 76.2(3) . . ?
C1_16 Zr1_16 C10_16 117.9(4) . . ?
C5_16 Zr1_16 C10_16 106.0(4) . . ?
C2_16 Zr1_16 C10_16 147.3(4) . . ?
C9_16 Zr1_16 C10_16 32.0(2) . . ?
C8_16 Zr1_16 C10_16 53.0(3) . . ?
C7_16 Zr1_16 C10_16 52.7(3) . . ?
C4_16 Zr1_16 C10_16 127.0(4) . . ?
C6_16 Zr1_16 C10_16 32.0(3) . . ?
O1_16 Zr1_16 C3_16 84.0(3) . . ?
C11_16 Zr1_16 C3_16 94.8(3) . . ?
C1_16 Zr1_16 C3_16 51.2(3) . . ?
C5_16 Zr1_16 C3_16 53.4(4) . . ?
C2_16 Zr1_16 C3_16 31.3(3) . . ?
C9_16 Zr1_16 C3_16 170.7(3) . . ?
C8_16 Zr1_16 C3_16 143.5(4) . . ?
C7_16 Zr1_16 C3_16 128.9(3) . . ?
C4_16 Zr1_16 C3_16 30.6(3) . . ?
C6_16 Zr1_16 C3_16 134.4(3) . . ?
C10_16 Zr1_16 C3_16 157.3(4) . . ?
O5_16 Si1_16 O4_16 113.0(3) . . ?
O5_16 Si1_16 O6_16 107.7(2) . . ?
O4_16 Si1_16 O6_16 107.2(2) . . ?
O5_16 Si1_16 O2_16 106.9(2) . . ?
O4_16 Si1_16 O2_16 108.9(2) . . ?
O6_16 Si1_16 O2_16 113.3(2) . . ?
O7B_16 Si2_16 O8B_16 110.4(12) . . ?
O7B_16 Si2_16 O3_16 124.9(8) . . ?
O8B_16 Si2_16 O3_16 84.6(8) . . ?
O7B_16 Si2_16 O9_16 120.3(8) . . ?
O8B_16 Si2_16 O9_16 94.4(8) . . ?
O3_16 Si2_16 O9_16 110.3(3) . . ?
O7B_16 Si2_16 O8A_16 65.4(9) . . ?
O8B_16 Si2_16 O8A_16 45.8(8) . . ?
O3_16 Si2_16 O8A_16 117.1(3) . . ?
O9_16 Si2_16 O8A_16 109.5(3) . . ?
O7B_16 Si2_16 O7A_16 44.9(8) . . ?
O8B_16 Si2_16 O7A_16 152.3(9) . . ?
O3_16 Si2_16 O7A_16 100.3(3) . . ?
O9_16 Si2_16 O7A_16 109.0(3) . . ?
O8A_16 Si2_16 O7A_16 110.1(3) . . ?
B1_16 O1_16 Zr1_16 148.5(5) . . ?
B1_16 O2_16 Si1_16 134.2(4) . . ?
B1_16 O3_16 Si2_16 143.0(6) . . ?
C12_16 O4_16 Si1_16 132.8(4) . . ?
C16_16 O5_16 Si1_16 131.6(4) . . ?
C20_16 O6_16 Si1_16 129.6(4) . . ?
C24_16 O7A_16 Si2_16 128.8(6) . . ?
C28_16 O8A_16 Si2_16 129.0(7) . . ?
Si2_16 O7B_16 C24_16 123.6(15) . . ?
Si2_16 O8B_16 C28_16 121.8(15) . . ?
C32_16 O9_16 Si2_16 134.7(5) . . ?
C2_16 C1_16 C5_16 112.5(13) . . ?
C2_16 C1_16 Zr1_16 75.8(6) . . ?
C5_16 C1_16 Zr1_16 74.4(8) . . ?
C1_16 C2_16 C3_16 107.1(11) . . ?
C1_16 C2_16 Zr1_16 73.3(6) . . ?
C3_16 C2_16 Zr1_16 75.8(6) . . ?
C4_16 C3_16 C2_16 108.5(11) . . ?
C4_16 C3_16 Zr1_16 73.9(6) . . ?
C2_16 C3_16 Zr1_16 72.9(5) . . ?
C3_16 C4_16 C5_16 110.1(13) . . ?
C3_16 C4_16 Zr1_16 75.5(6) . . ?
C5_16 C4_16 Zr1_16 72.3(6) . . ?
C1_16 C5_16 C4_16 101.8(11) . . ?
C1_16 C5_16 Zr1_16 73.2(6) . . ?
C4_16 C5_16 Zr1_16 74.7(7) . . ?
C7_16 C6_16 C10_16 107.4(8) . . ?
C7_16 C6_16 Zr1_16 73.3(4) . . ?
C10_16 C6_16 Zr1_16 74.1(4) . . ?
C6_16 C7_16 C8_16 108.8(9) . . ?
C6_16 C7_16 Zr1_16 74.8(5) . . ?
C8_16 C7_16 Zr1_16 74.0(4) . . ?
C9_16 C8_16 C7_16 107.4(8) . . ?
C9_16 C8_16 Zr1_16 73.8(4) . . ?
C7_16 C8_16 Zr1_16 73.9(4) . . ?
C8_16 C9_16 C10_16 108.6(8) . . ?
C8_16 C9_16 Zr1_16 74.2(4) . . ?
C10_16 C9_16 Zr1_16 75.0(5) . . ?
C9_16 C10_16 C6_16 107.8(8) . . ?
C9_16 C10_16 Zr1_16 73.0(4) . . ?
C6_16 C10_16 Zr1_16 73.9(5) . . ?
O4_16 C12_16 C13_16 105.4(6) . . ?
O4_16 C12_16 C14_16 109.8(6) . . ?
C13_16 C12_16 C14_16 111.2(7) . . ?
O4_16 C12_16 C15_16 108.2(6) . . ?
C13_16 C12_16 C15_16 111.2(7) . . ?
C14_16 C12_16 C15_16 110.8(7) . . ?
O5_16 C16_16 C18_16 106.0(6) . . ?
O5_16 C16_16 C19_16 107.8(7) . . ?
C18_16 C16_16 C19_16 112.9(7) . . ?
O5_16 C16_16 C17_16 109.6(6) . . ?
C18_16 C16_16 C17_16 112.8(8) . . ?
C19_16 C16_16 C17_16 107.6(7) . . ?
O6_16 C20_16 C23_16 105.9(6) . . ?
O6_16 C20_16 C22_16 108.5(6) . . ?
C23_16 C20_16 C22_16 111.7(6) . . ?
O6_16 C20_16 C21_16 110.0(5) . . ?
C23_16 C20_16 C21_16 110.3(7) . . ?
C22_16 C20_16 C21_16 110.4(6) . . ?
O7A_16 C24_16 C27_16 98.0(8) . . ?
O7A_16 C24_16 C25_16 113.3(7) . . ?
C27_16 C24_16 C25_16 111.1(8) . . ?
O7A_16 C24_16 C26_16 113.2(8) . . ?
C27_16 C24_16 C26_16 109.8(8) . . ?
C25_16 C24_16 C26_16 110.9(8) . . ?
O7A_16 C24_16 O7B_16 45.4(8) . . ?
C27_16 C24_16 O7B_16 141.7(11) . . ?
C25_16 C24_16 O7B_16 82.0(10) . . ?
C26_16 C24_16 O7B_16 97.4(10) . . ?
O8A_16 C28_16 C29_16 116.3(9) . . ?
O8A_16 C28_16 C30_16 107.0(8) . . ?
C29_16 C28_16 C30_16 112.7(11) . . ?
O8A_16 C28_16 C31_16 100.2(9) . . ?
C29_16 C28_16 C31_16 108.9(9) . . ?
C30_16 C28_16 C31_16 111.0(10) . . ?
O8A_16 C28_16 O8B_16 46.9(9) . . ?
C29_16 C28_16 O8B_16 70.6(11) . . ?
C30_16 C28_16 O8B_16 118.3(10) . . ?
C31_16 C28_16 O8B_16 126.4(10) . . ?
O9_16 C32_16 C35_16 108.6(7) . . ?
O9_16 C32_16 C33_16 110.9(8) . . ?
C35_16 C32_16 C33_16 111.0(7) . . ?
O9_16 C32_16 C34_16 104.7(6) . . ?
C35_16 C32_16 C34_16 111.7(8) . . ?
C33_16 C32_16 C34_16 109.6(7) . . ?
O1_16 B1_16 O3_16 119.2(7) . . ?
O1_16 B1_16 O2_16 122.8(7) . . ?
O3_16 B1_16 O2_16 117.9(7) . . ?
O1_17 Zr1_17 C11_17 99.6(2) . . ?
O1_17 Zr1_17 C1_17 99.4(3) . . ?
C11_17 Zr1_17 C1_17 130.4(3) . . ?
O1_17 Zr1_17 C2_17 82.5(2) . . ?
C11_17 Zr1_17 C2_17 107.7(3) . . ?
C1_17 Zr1_17 C2_17 31.9(3) . . ?
O1_17 Zr1_17 C7_17 84.0(2) . . ?
C11_17 Zr1_17 C7_17 124.8(3) . . ?
C1_17 Zr1_17 C7_17 102.4(3) . . ?
C2_17 Zr1_17 C7_17 127.2(3) . . ?
O1_17 Zr1_17 C6_17 113.4(2) . . ?
C11_17 Zr1_17 C6_17 127.3(3) . . ?
C1_17 Zr1_17 C6_17 84.5(3) . . ?
C2_17 Zr1_17 C6_17 116.1(3) . . ?
C7_17 Zr1_17 C6_17 32.3(2) . . ?
O1_17 Zr1_17 C5_17 131.1(3) . . ?
C11_17 Zr1_17 C5_17 110.6(3) . . ?
C1_17 Zr1_17 C5_17 32.1(3) . . ?
C2_17 Zr1_17 C5_17 52.6(3) . . ?
C7_17 Zr1_17 C5_17 106.9(3) . . ?
C6_17 Zr1_17 C5_17 77.4(3) . . ?
O1_17 Zr1_17 C8_17 85.1(3) . . ?
C11_17 Zr1_17 C8_17 93.1(3) . . ?
C1_17 Zr1_17 C8_17 133.8(3) . . ?
C2_17 Zr1_17 C8_17 157.2(3) . . ?
C7_17 Zr1_17 C8_17 31.9(2) . . ?
C6_17 Zr1_17 C8_17 52.8(3) . . ?
C5_17 Zr1_17 C8_17 128.7(3) . . ?
O1_17 Zr1_17 C3_17 99.8(2) . . ?
C11_17 Zr1_17 C3_17 79.1(3) . . ?
C1_17 Zr1_17 C3_17 52.7(3) . . ?
C2_17 Zr1_17 C3_17 31.4(2) . . ?
C7_17 Zr1_17 C3_17 155.1(3) . . ?
C6_17 Zr1_17 C3_17 129.8(2) . . ?
C5_17 Zr1_17 C3_17 52.4(2) . . ?
C8_17 Zr1_17 C3_17 171.4(3) . . ?
O1_17 Zr1_17 C10_17 136.1(2) . . ?
C11_17 Zr1_17 C10_17 95.7(3) . . ?
C1_17 Zr1_17 C10_17 101.2(3) . . ?
C2_17 Zr1_17 C10_17 130.8(3) . . ?
C7_17 Zr1_17 C10_17 53.9(3) . . ?
C6_17 Zr1_17 C10_17 32.7(2) . . ?
C5_17 Zr1_17 C10_17 79.0(3) . . ?
C8_17 Zr1_17 C10_17 53.1(3) . . ?
C3_17 Zr1_17 C10_17 123.4(3) . . ?
O1_17 Zr1_17 C4_17 130.8(2) . . ?
C11_17 Zr1_17 C4_17 80.5(3) . . ?
C1_17 Zr1_17 C4_17 52.9(3) . . ?
C2_17 Zr1_17 C4_17 52.1(3) . . ?
C7_17 Zr1_17 C4_17 136.1(3) . . ?
C6_17 Zr1_17 C4_17 104.0(3) . . ?
C5_17 Zr1_17 C4_17 32.0(2) . . ?
C8_17 Zr1_17 C4_17 144.1(3) . . ?
C3_17 Zr1_17 C4_17 31.4(2) . . ?
C10_17 Zr1_17 C4_17 92.1(3) . . ?
O1_17 Zr1_17 C9_17 114.6(2) . . ?
C11_17 Zr1_17 C9_17 76.2(3) . . ?
C1_17 Zr1_17 C9_17 133.1(3) . . ?
C2_17 Zr1_17 C9_17 162.0(3) . . ?
C7_17 Zr1_17 C9_17 53.6(3) . . ?
C6_17 Zr1_17 C9_17 53.3(3) . . ?
C5_17 Zr1_17 C9_17 109.5(3) . . ?
C8_17 Zr1_17 C9_17 32.2(2) . . ?
C3_17 Zr1_17 C9_17 140.3(3) . . ?
C10_17 Zr1_17 C9_17 32.1(2) . . ?
C4_17 Zr1_17 C9_17 113.1(3) . . ?
O2_17 Si1_17 O6_17 105.7(3) . . ?
O2_17 Si1_17 O4_17 110.5(3) . . ?
O6_17 Si1_17 O4_17 113.7(3) . . ?
O2_17 Si1_17 O5_17 111.5(3) . . ?
O6_17 Si1_17 O5_17 108.8(2) . . ?
O4_17 Si1_17 O5_17 106.7(2) . . ?
O9B_17 Si2_17 O7A_17 75.1(7) . . ?
O9B_17 Si2_17 O8_17 114.9(6) . . ?
O7A_17 Si2_17 O8_17 111.7(5) . . ?
O9B_17 Si2_17 O3_17 121.6(6) . . ?
O7A_17 Si2_17 O3_17 118.1(5) . . ?
O8_17 Si2_17 O3_17 111.0(3) . . ?
O9B_17 Si2_17 O9A_17 30.6(6) . . ?
O7A_17 Si2_17 O9A_17 105.6(6) . . ?
O8_17 Si2_17 O9A_17 105.8(4) . . ?
O3_17 Si2_17 O9A_17 103.4(4) . . ?
O9B_17 Si2_17 O7B_17 106.5(7) . . ?
O7A_17 Si2_17 O7B_17 32.9(5) . . ?
O8_17 Si2_17 O7B_17 106.3(5) . . ?
O3_17 Si2_17 O7B_17 93.0(5) . . ?
O9A_17 Si2_17 O7B_17 135.5(5) . . ?
B1_17 O1_17 Zr1_17 160.1(5) . . ?
B1_17 O2_17 Si1_17 146.5(5) . . ?
B1_17 O3_17 Si2_17 149.8(5) . . ?
C12_17 O4_17 Si1_17 134.1(4) . . ?
C16_17 O5_17 Si1_17 131.3(4) . . ?
C20_17 O6_17 Si1_17 130.9(4) . . ?
Si2_17 O7A_17 C24_17 130.3(9) . . ?
C24_17 O7B_17 Si2_17 131.5(11) . . ?
C28_17 O8_17 Si2_17 138.2(6) . . ?
C32_17 O9A_17 Si2_17 118.7(9) . . ?
Si2_17 O9B_17 C32_17 151.7(12) . . ?
C2_17 C1_17 C5_17 107.7(8) . . ?
C2_17 C1_17 Zr1_17 75.0(5) . . ?
C5_17 C1_17 Zr1_17 75.5(4) . . ?
C3_17 C2_17 C1_17 108.8(8) . . ?
C3_17 C2_17 Zr1_17 75.5(5) . . ?
C1_17 C2_17 Zr1_17 73.1(5) . . ?
C2_17 C3_17 C4_17 108.3(7) . . ?
C2_17 C3_17 Zr1_17 73.1(5) . . ?
C4_17 C3_17 Zr1_17 74.6(4) . . ?
C3_17 C4_17 C5_17 107.7(7) . . ?
C3_17 C4_17 Zr1_17 74.0(4) . . ?
C5_17 C4_17 Zr1_17 73.2(4) . . ?
C1_17 C5_17 C4_17 107.4(7) . . ?
C1_17 C5_17 Zr1_17 72.4(4) . . ?
C4_17 C5_17 Zr1_17 74.9(4) . . ?
C7_17 C6_17 C10_17 108.8(7) . . ?
C7_17 C6_17 Zr1_17 73.9(4) . . ?
C10_17 C6_17 Zr1_17 74.7(4) . . ?
C8_17 C7_17 C6_17 107.4(8) . . ?
C8_17 C7_17 Zr1_17 75.0(4) . . ?
C6_17 C7_17 Zr1_17 73.8(4) . . ?
C7_17 C8_17 C9_17 109.6(8) . . ?
C7_17 C8_17 Zr1_17 73.2(4) . . ?
C9_17 C8_17 Zr1_17 75.0(4) . . ?
C10_17 C9_17 C8_17 106.9(8) . . ?
C10_17 C9_17 Zr1_17 73.0(4) . . ?
C8_17 C9_17 Zr1_17 72.8(4) . . ?
C9_17 C10_17 C6_17 107.2(7) . . ?
C9_17 C10_17 Zr1_17 74.9(4) . . ?
C6_17 C10_17 Zr1_17 72.6(4) . . ?
O4_17 C12_17 C15_17 109.9(6) . . ?
O4_17 C12_17 C14_17 107.9(6) . . ?
C15_17 C12_17 C14_17 110.9(7) . . ?
O4_17 C12_17 C13_17 104.9(6) . . ?
C15_17 C12_17 C13_17 111.1(7) . . ?
C14_17 C12_17 C13_17 112.0(7) . . ?
O5_17 C16_17 C18_17 111.4(6) . . ?
O5_17 C16_17 C17_17 109.9(6) . . ?
C18_17 C16_17 C17_17 110.3(7) . . ?
O5_17 C16_17 C19_17 106.6(6) . . ?
C18_17 C16_17 C19_17 109.6(7) . . ?
C17_17 C16_17 C19_17 109.1(6) . . ?
O6_17 C20_17 C22_17 104.4(5) . . ?
O6_17 C20_17 C23_17 107.6(5) . . ?
C22_17 C20_17 C23_17 111.9(6) . . ?
O6_17 C20_17 C21_17 110.4(6) . . ?
C22_17 C20_17 C21_17 111.5(6) . . ?
C23_17 C20_17 C21_17 110.7(6) . . ?
O7B_17 C24_17 C25A_17 74.7(12) . . ?
O7B_17 C24_17 C26_17 129.1(12) . . ?
C25A_17 C24_17 C26_17 140.3(17) . . ?
O7B_17 C24_17 C27_17 104.9(12) . . ?
C25A_17 C24_17 C27_17 100.6(15) . . ?
C26_17 C24_17 C27_17 101.8(11) . . ?
O7B_17 C24_17 O7A_17 37.0(7) . . ?
C25A_17 C24_17 O7A_17 110.1(13) . . ?
C26_17 C24_17 O7A_17 93.6(9) . . ?
C27_17 C24_17 O7A_17 107.8(12) . . ?
O7B_17 C24_17 C25B_17 105.2(11) . . ?
C25A_17 C24_17 C25B_17 47.0(12) . . ?
C26_17 C24_17 C25B_17 93.4(12) . . ?
C27_17 C24_17 C25B_17 124.9(14) . . ?
O7A_17 C24_17 C25B_17 123.9(10) . . ?
O8_17 C28_17 C31_17 111.4(9) . . ?
O8_17 C28_17 C30_17 109.6(8) . . ?
C31_17 C28_17 C30_17 112.1(9) . . ?
O8_17 C28_17 C29_17 104.0(8) . . ?
C31_17 C28_17 C29_17 111.8(12) . . ?
C30_17 C28_17 C29_17 107.7(9) . . ?
O9B_17 C32_17 O9A_17 36.4(6) . . ?
O9B_17 C32_17 C33_17 127.9(14) . . ?
O9A_17 C32_17 C33_17 93.3(12) . . ?
O9B_17 C32_17 C34_17 91.5(9) . . ?
O9A_17 C32_17 C34_17 118.0(9) . . ?
C33_17 C32_17 C34_17 110.5(11) . . ?
O9B_17 C32_17 C35_17 101.5(13) . . ?
O9A_17 C32_17 C35_17 111.6(10) . . ?
C33_17 C32_17 C35_17 113.5(9) . . ?
C34_17 C32_17 C35_17 109.2(14) . . ?
O1_17 B1_17 O3_17 122.9(7) . . ?
O1_17 B1_17 O2_17 121.8(7) . . ?
O3_17 B1_17 O2_17 115.2(7) . . ?
O1_18 Zr1_18 C11_18 97.9(3) . . ?
O1_18 Zr1_18 C6A_18 147.4(5) . . ?
C11_18 Zr1_18 C6A_18 96.3(5) . . ?
O1_18 Zr1_18 C9A_18 94.4(6) . . ?
C11_18 Zr1_18 C9A_18 96.5(6) . . ?
C6A_18 Zr1_18 C9A_18 54.8(6) . . ?
O1_18 Zr1_18 C7A_18 122.5(5) . . ?
C11_18 Zr1_18 C7A_18 129.5(5) . . ?
C6A_18 Zr1_18 C7A_18 33.6(5) . . ?
C9A_18 Zr1_18 C7A_18 55.2(7) . . ?
O1_18 Zr1_18 C3B_18 97.4(5) . . ?
C11_18 Zr1_18 C3B_18 94.7(5) . . ?
C6A_18 Zr1_18 C3B_18 110.5(7) . . ?
C9A_18 Zr1_18 C3B_18 162.5(7) . . ?
C7A_18 Zr1_18 C3B_18 107.3(7) . . ?
O1_18 Zr1_18 C1B_18 126.2(6) . . ?
C11_18 Zr1_18 C1B_18 126.1(5) . . ?
C6A_18 Zr1_18 C1B_18 64.0(7) . . ?
C9A_18 Zr1_18 C1B_18 107.7(7) . . ?
C7A_18 Zr1_18 C1B_18 52.6(7) . . ?
C3B_18 Zr1_18 C1B_18 54.8(7) . . ?
O1_18 Zr1_18 C8A_18 96.5(4) . . ?
C11_18 Zr1_18 C8A_18 127.2(3) . . ?
C6A_18 Zr1_18 C8A_18 52.1(5) . . ?
C9A_18 Zr1_18 C8A_18 31.7(5) . . ?
C7A_18 Zr1_18 C8A_18 31.6(5) . . ?
C3B_18 Zr1_18 C8A_18 133.2(6) . . ?
C1B_18 Zr1_18 C8A_18 81.3(5) . . ?
O1_18 Zr1_18 C5A_18 120.8(5) . . ?
C11_18 Zr1_18 C5A_18 97.8(5) . . ?
C6A_18 Zr1_18 C5A_18 85.9(6) . . ?
C9A_18 Zr1_18 C5A_18 139.3(7) . . ?
C7A_18 Zr1_18 C5A_18 86.9(6) . . ?
C3B_18 Zr1_18 C5A_18 24.7(5) . . ?
C1B_18 Zr1_18 C5A_18 36.0(6) . . ?
C8A_18 Zr1_18 C5A_18 117.1(5) . . ?
O1_18 Zr1_18 C1A_18 98.6(3) . . ?
C11_18 Zr1_18 C1A_18 127.7(3) . . ?
C6A_18 Zr1_18 C1A_18 95.6(5) . . ?
C9A_18 Zr1_18 C1A_18 131.0(6) . . ?
C7A_18 Zr1_18 C1A_18 78.4(5) . . ?
C3B_18 Zr1_18 C1A_18 34.1(5) . . ?
C1B_18 Zr1_18 C1A_18 31.6(5) . . ?
C8A_18 Zr1_18 C1A_18 99.6(3) . . ?
C5A_18 Zr1_18 C1A_18 33.0(5) . . ?
O1_18 Zr1_18 C8B_18 73.3(5) . . ?
C11_18 Zr1_18 C8B_18 111.8(5) . . ?
C6A_18 Zr1_18 C8B_18 74.2(6) . . ?
C9A_18 Zr1_18 C8B_18 24.8(5) . . ?
C7A_18 Zr1_18 C8B_18 61.0(6) . . ?
C3B_18 Zr1_18 C8B_18 152.7(7) . . ?
C1B_18 Zr1_18 C8B_18 109.7(6) . . ?
C8A_18 Zr1_18 C8B_18 29.6(4) . . ?
C5A_18 Zr1_18 C8B_18 145.6(6) . . ?
C1A_18 Zr1_18 C8B_18 120.5(5) . . ?
O1_18 Zr1_18 C10A_18 116.8(4) . . ?
C11_18 Zr1_18 C10A_18 74.1(3) . . ?
C6A_18 Zr1_18 C10A_18 41.1(5) . . ?
C9A_18 Zr1_18 C10A_18 30.2(5) . . ?
C7A_18 Zr1_18 C10A_18 61.7(5) . . ?
C3B_18 Zr1_18 C10A_18 144.9(6) . . ?
C1B_18 Zr1_18 C10A_18 105.0(6) . . ?
C8A_18 Zr1_18 C10A_18 54.2(3) . . ?
C5A_18 Zr1_18 C10A_18 122.4(6) . . ?
C1A_18 Zr1_18 C10A_18 136.4(4) . . ?
C8B_18 Zr1_18 C10A_18 54.8(5) . . ?
O5B_18 Si1_18 O2_18 138.8(6) . . ?
O5B_18 Si1_18 O4A_18 70.7(5) . . ?
O2_18 Si1_18 O4A_18 123.3(4) . . ?
O5B_18 Si1_18 O6A_18 82.4(5) . . ?
O2_18 Si1_18 O6A_18 118.8(4) . . ?
O4A_18 Si1_18 O6A_18 110.9(4) . . ?
O5B_18 Si1_18 O4B_18 107.4(6) . . ?
O2_18 Si1_18 O4B_18 93.1(5) . . ?
O4A_18 Si1_18 O4B_18 36.7(4) . . ?
O6A_18 Si1_18 O4B_18 118.7(5) . . ?
O5B_18 Si1_18 O6B_18 117.0(6) . . ?
O2_18 Si1_18 O6B_18 94.8(4) . . ?
O4A_18 Si1_18 O6B_18 111.2(4) . . ?
O6A_18 Si1_18 O6B_18 36.1(4) . . ?
O4B_18 Si1_18 O6B_18 96.6(5) . . ?
O5B_18 Si1_18 O5A_18 49.4(5) . . ?
O2_18 Si1_18 O5A_18 90.4(4) . . ?
O4A_18 Si1_18 O5A_18 106.4(4) . . ?
O6A_18 Si1_18 O5A_18 100.5(4) . . ?
O4B_18 Si1_18 O5A_18 132.3(4) . . ?
O6B_18 Si1_18 O5A_18 130.5(4) . . ?
O8_18 Si2_18 O3_18 114.5(3) . . ?
O8_18 Si2_18 O9_18 109.3(3) . . ?
O3_18 Si2_18 O9_18 110.6(3) . . ?
O8_18 Si2_18 O7_18 108.0(4) . . ?
O3_18 Si2_18 O7_18 102.9(3) . . ?
O9_18 Si2_18 O7_18 111.4(3) . . ?
B1_18 O1_18 Zr1_18 176.1(6) . . ?
B1_18 O2_18 Si1_18 155.4(6) . . ?
B1_18 O3_18 Si2_18 153.9(6) . . ?
Si1_18 O4A_18 C12_18 125.7(7) . . ?
C16_18 O5A_18 Si1_18 125.1(6) . . ?
Si1_18 O6A_18 C20_18 124.3(7) . . ?
C12_18 O4B_18 Si1_18 120.3(8) . . ?
Si1_18 O5B_18 C16_18 128.4(8) . . ?
C20_18 O6B_18 Si1_18 135.7(8) . . ?
C24_18 O7_18 Si2_18 137.2(6) . . ?
C28_18 O8_18 Si2_18 136.1(6) . . ?
C32_18 O9_18 Si2_18 136.1(5) . . ?
C2A_18 C1A_18 C1B_18 154.0(13) . . ?
C2A_18 C1A_18 C5A_18 107.6(12) . . ?
C1B_18 C1A_18 C5A_18 67.1(12) . . ?
C2A_18 C1A_18 C3B_18 64.6(12) . . ?
C1B_18 C1A_18 C3B_18 107.9(14) . . ?
C5A_18 C1A_18 C3B_18 43.3(9) . . ?
C2A_18 C1A_18 Zr1_18 81.1(8) . . ?
C1B_18 C1A_18 Zr1_18 73.1(9) . . ?
C5A_18 C1A_18 Zr1_18 73.2(7) . . ?
C3B_18 C1A_18 Zr1_18 71.7(8) . . ?
C1A_18 C1B_18 C5B_18 107.8(16) . . ?
C1A_18 C1B_18 C5A_18 58.4(11) . . ?
C5B_18 C1B_18 C5A_18 49.9(12) . . ?
C1A_18 C1B_18 Zr1_18 75.3(10) . . ?
C5B_18 C1B_18 Zr1_18 77.4(12) . . ?
C5A_18 C1B_18 Zr1_18 72.7(10) . . ?
C1A_18 C2A_18 C3A_18 108.9(13) . . ?
C1A_18 C2A_18 C3B_18 62.1(11) . . ?
C3A_18 C2A_18 C3B_18 47.9(10) . . ?
C1A_18 C2A_18 Zr1_18 69.3(7) . . ?
C3A_18 C2A_18 Zr1_18 73.5(8) . . ?
C3B_18 C2A_18 Zr1_18 66.8(9) . . ?
C3B_18 C3A_18 C4A_18 39.2(11) . . ?
C3B_18 C3A_18 C2A_18 68.3(14) . . ?
C4A_18 C3A_18 C2A_18 106.6(14) . . ?
C3B_18 C3A_18 Zr1_18 69.3(11) . . ?
C4A_18 C3A_18 Zr1_18 71.6(9) . . ?
C2A_18 C3A_18 Zr1_18 74.8(8) . . ?
C4A_18 C3B_18 C5A_18 87(2) . . ?
C4A_18 C3B_18 C3A_18 84(2) . . ?
C5A_18 C3B_18 C3A_18 161(2) . . ?
C4A_18 C3B_18 C4B_18 46.6(16) . . ?
C5A_18 C3B_18 C4B_18 40.8(13) . . ?
C3A_18 C3B_18 C4B_18 128(2) . . ?
C4A_18 C3B_18 C1A_18 149(3) . . ?
C5A_18 C3B_18 C1A_18 66.4(17) . . ?
C3A_18 C3B_18 C1A_18 115.9(18) . . ?
C4B_18 C3B_18 C1A_18 105.1(18) . . ?
C4A_18 C3B_18 C2A_18 145(3) . . ?
C5A_18 C3B_18 C2A_18 119(2) . . ?
C3A_18 C3B_18 C2A_18 63.8(14) . . ?
C4B_18 C3B_18 C2A_18 152.1(19) . . ?
C1A_18 C3B_18 C2A_18 53.4(10) . . ?
C4A_18 C3B_18 Zr1_18 85.4(17) . . ?
C5A_18 C3B_18 Zr1_18 79.0(14) . . ?
C3A_18 C3B_18 Zr1_18 84.0(12) . . ?
C4B_18 C3B_18 Zr1_18 77.0(10) . . ?
C1A_18 C3B_18 Zr1_18 74.2(8) . . ?
C2A_18 C3B_18 Zr1_18 79.6(9) . . ?
C3B_18 C4A_18 C4B_18 93(2) . . ?
C3B_18 C4A_18 C5A_18 51.3(17) . . ?
C4B_18 C4A_18 C5A_18 41.2(13) . . ?
C3B_18 C4A_18 C3A_18 56.9(19) . . ?
C4B_18 C4A_18 C3A_18 145(2) . . ?
C5A_18 C4A_18 C3A_18 106.6(17) . . ?
C3B_18 C4A_18 Zr1_18 74.1(16) . . ?
C4B_18 C4A_18 Zr1_18 77.7(14) . . ?
C5A_18 C4A_18 Zr1_18 71.8(9) . . ?
C3A_18 C4A_18 Zr1_18 76.8(9) . . ?
C5A_18 C4B_18 C4A_18 92(2) . . ?
C5A_18 C4B_18 C5B_18 63.6(19) . . ?
C4A_18 C4B_18 C5B_18 148(2) . . ?
C5A_18 C4B_18 C3B_18 50.7(17) . . ?
C4A_18 C4B_18 C3B_18 40.9(14) . . ?
C5B_18 C4B_18 C3B_18 110.9(19) . . ?
C5A_18 C4B_18 Zr1_18 76.8(16) . . ?
C4A_18 C4B_18 Zr1_18 79.8(14) . . ?
C5B_18 C4B_18 Zr1_18 75.7(11) . . ?
C3B_18 C4B_18 Zr1_18 71.3(10) . . ?
C4B_18 C5A_18 C3B_18 88(2) . . ?
C4B_18 C5A_18 C5B_18 76(2) . . ?
C3B_18 C5A_18 C5B_18 152(2) . . ?
C4B_18 C5A_18 C4A_18 47.2(16) . . ?
C3B_18 C5A_18 C4A_18 41.3(13) . . ?
C5B_18 C5A_18 C4A_18 121(2) . . ?
C4B_18 C5A_18 C1A_18 151(2) . . ?
C3B_18 C5A_18 C1A_18 70.3(18) . . ?
C5B_18 C5A_18 C1A_18 114.0(17) . . ?
C4A_18 C5A_18 C1A_18 110.0(17) . . ?
C4B_18 C5A_18 C1B_18 132(2) . . ?
C3B_18 C5A_18 C1B_18 121(2) . . ?
C5B_18 C5A_18 C1B_18 60.0(13) . . ?
C4A_18 C5A_18 C1B_18 147.6(17) . . ?
C1A_18 C5A_18 C1B_18 54.5(11) . . ?
C4B_18 C5A_18 Zr1_18 82.7(16) . . ?
C3B_18 C5A_18 Zr1_18 76.3(14) . . ?
C5B_18 C5A_18 Zr1_18 79.0(12) . . ?
C4A_18 C5A_18 Zr1_18 77.1(10) . . ?
C1A_18 C5A_18 Zr1_18 73.8(7) . . ?
C1B_18 C5A_18 Zr1_18 71.3(10) . . ?
C5A_18 C5B_18 C4B_18 39.9(11) . . ?
C5A_18 C5B_18 C1B_18 70.1(15) . . ?
C4B_18 C5B_18 C1B_18 107.7(18) . . ?
C5A_18 C5B_18 Zr1_18 72.5(12) . . ?
C4B_18 C5B_18 Zr1_18 73.5(11) . . ?
C1B_18 C5B_18 Zr1_18 70.1(11) . . ?
C6B_18 C6A_18 C7A_18 77.3(17) . . ?
C6B_18 C6A_18 C10A_18 39.2(12) . . ?
C7A_18 C6A_18 C10A_18 108.0(15) . . ?
C6B_18 C6A_18 Zr1_18 86.5(15) . . ?
C7A_18 C6A_18 Zr1_18 74.4(11) . . ?
C10A_18 C6A_18 Zr1_18 72.6(7) . . ?
C6A_18 C6B_18 C10A_18 106(2) . . ?
C6A_18 C6B_18 C9A_18 138(2) . . ?
C10A_18 C6B_18 C9A_18 61.8(13) . . ?
C6A_18 C6B_18 C7A_18 62.1(15) . . ?
C10A_18 C6B_18 C7A_18 142.1(17) . . ?
C9A_18 C6B_18 C7A_18 101.9(17) . . ?
C6A_18 C6B_18 C8A_18 110.1(17) . . ?
C10A_18 C6B_18 C8A_18 114.0(16) . . ?
C9A_18 C6B_18 C8A_18 54.3(12) . . ?
C7A_18 C6B_18 C8A_18 51.0(9) . . ?
C6A_18 C6B_18 Zr1_18 69.7(14) . . ?
C10A_18 C6B_18 Zr1_18 74.4(10) . . ?
C9A_18 C6B_18 Zr1_18 68.1(10) . . ?
C7A_18 C6B_18 Zr1_18 67.7(9) . . ?
C8A_18 C6B_18 Zr1_18 68.9(6) . . ?
C8A_18 C7A_18 C6A_18 103.1(16) . . ?
C8A_18 C7A_18 C6B_18 64.9(12) . . ?
C6A_18 C7A_18 C6B_18 40.7(10) . . ?
C8A_18 C7A_18 Zr1_18 75.7(9) . . ?
C6A_18 C7A_18 Zr1_18 72.0(11) . . ?
C6B_18 C7A_18 Zr1_18 76.4(10) . . ?
C8B_18 C8A_18 C9A_18 47.8(11) . . ?
C8B_18 C8A_18 C7A_18 148.1(14) . . ?
C9A_18 C8A_18 C7A_18 114.4(15) . . ?
C8B_18 C8A_18 C6B_18 102.0(12) . . ?
C9A_18 C8A_18 C6B_18 54.5(12) . . ?
C7A_18 C8A_18 C6B_18 64.1(11) . . ?
C8B_18 C8A_18 Zr1_18 76.0(8) . . ?
C9A_18 C8A_18 Zr1_18 71.5(8) . . ?
C7A_18 C8A_18 Zr1_18 72.8(9) . . ?
C6B_18 C8A_18 Zr1_18 75.1(7) . . ?
C9A_18 C8B_18 C8A_18 69.5(16) . . ?
C9A_18 C8B_18 C9B_18 46.1(14) . . ?
C8A_18 C8B_18 C9B_18 114.8(16) . . ?
C9A_18 C8B_18 Zr1_18 73.3(13) . . ?
C8A_18 C8B_18 Zr1_18 74.5(8) . . ?
C9B_18 C8B_18 Zr1_18 77.8(10) . . ?
C9B_18 C9A_18 C8B_18 83(2) . . ?
C9B_18 C9A_18 C10A_18 88(2) . . ?
C8B_18 C9A_18 C10A_18 159(2) . . ?
C9B_18 C9A_18 C8A_18 144(3) . . ?
C8B_18 C9A_18 C8A_18 62.6(15) . . ?
C10A_18 C9A_18 C8A_18 120.1(19) . . ?
C9B_18 C9A_18 C6B_18 139(3) . . ?
C8B_18 C9A_18 C6B_18 133(2) . . ?
C10A_18 C9A_18 C6B_18 51.1(12) . . ?
C8A_18 C9A_18 C6B_18 71.2(14) . . ?
C9B_18 C9A_18 Zr1_18 88.1(15) . . ?
C8B_18 C9A_18 Zr1_18 81.9(14) . . ?
C10A_18 C9A_18 Zr1_18 79.2(9) . . ?
C8A_18 C9A_18 Zr1_18 76.8(8) . . ?
C6B_18 C9A_18 Zr1_18 80.8(10) . . ?
C9A_18 C9B_18 C8B_18 50.5(16) . . ?
C9A_18 C9B_18 C10A_18 53.8(16) . . ?
C8B_18 C9B_18 C10A_18 102.4(14) . . ?
C9A_18 C9B_18 Zr1_18 69.3(14) . . ?
C8B_18 C9B_18 Zr1_18 71.1(9) . . ?
C10A_18 C9B_18 Zr1_18 69.6(7) . . ?
C6B_18 C10A_18 C9A_18 67.1(14) . . ?
C6B_18 C10A_18 C9B_18 105.3(14) . . ?
C9A_18 C10A_18 C9B_18 38.4(10) . . ?
C6B_18 C10A_18 C6A_18 35.2(11) . . ?
C9A_18 C10A_18 C6A_18 93.8(14) . . ?
C9B_18 C10A_18 C6A_18 126.7(11) . . ?
C6B_18 C10A_18 Zr1_18 79.8(10) . . ?
C9A_18 C10A_18 Zr1_18 70.6(9) . . ?
C9B_18 C10A_18 Zr1_18 74.1(6) . . ?
C6A_18 C10A_18 Zr1_18 66.4(7) . . ?
C13_18 C12_18 O4B_18 122.8(10) . . ?
C13_18 C12_18 C14_18 112.6(10) . . ?
O4B_18 C12_18 C14_18 112.5(8) . . ?
C13_18 C12_18 C15_18 108.9(9) . . ?
O4B_18 C12_18 C15_18 87.4(9) . . ?
C14_18 C12_18 C15_18 109.0(10) . . ?
C13_18 C12_18 O4A_18 92.4(9) . . ?
O4B_18 C12_18 O4A_18 40.6(5) . . ?
C14_18 C12_18 O4A_18 108.1(8) . . ?
C15_18 C12_18 O4A_18 124.8(9) . . ?
O5A_18 C16_18 C17_18 130.4(9) . . ?
O5A_18 C16_18 C18_18 90.0(8) . . ?
C17_18 C16_18 C18_18 106.2(8) . . ?
O5A_18 C16_18 C19_18 101.8(8) . . ?
C17_18 C16_18 C19_18 110.9(8) . . ?
C18_18 C16_18 C19_18 116.7(9) . . ?
O5A_18 C16_18 O5B_18 51.9(5) . . ?
C17_18 C16_18 O5B_18 80.7(7) . . ?
C18_18 C16_18 O5B_18 121.7(8) . . ?
C19_18 C16_18 O5B_18 113.6(8) . . ?
O6B_18 C20_18 C23_18 129.7(10) . . ?
O6B_18 C20_18 C22_18 95.4(11) . . ?
C23_18 C20_18 C22_18 107.5(11) . . ?
O6B_18 C20_18 C21_18 101.1(8) . . ?
C23_18 C20_18 C21_18 108.8(10) . . ?
C22_18 C20_18 C21_18 114.1(11) . . ?
O6B_18 C20_18 O6A_18 40.3(5) . . ?
C23_18 C20_18 O6A_18 89.8(8) . . ?
C22_18 C20_18 O6A_18 117.5(10) . . ?
C21_18 C20_18 O6A_18 115.6(7) . . ?
O7_18 C24_18 C26_18 113.8(7) . . ?
O7_18 C24_18 C27_18 104.4(10) . . ?
C26_18 C24_18 C27_18 111.1(9) . . ?
O7_18 C24_18 C25_18 107.1(8) . . ?
C26_18 C24_18 C25_18 111.8(10) . . ?
C27_18 C24_18 C25_18 108.2(9) . . ?
O8_18 C28_18 C29_18 109.8(8) . . ?
O8_18 C28_18 C31_18 104.6(7) . . ?
C29_18 C28_18 C31_18 111.9(7) . . ?
O8_18 C28_18 C30_18 107.1(6) . . ?
C29_18 C28_18 C30_18 111.4(9) . . ?
C31_18 C28_18 C30_18 111.7(7) . . ?
O9_18 C32_18 C34_18 106.6(7) . . ?
O9_18 C32_18 C33_18 109.1(6) . . ?
C34_18 C32_18 C33_18 112.2(7) . . ?
O9_18 C32_18 C35_18 109.5(6) . . ?
C34_18 C32_18 C35_18 110.5(7) . . ?
C33_18 C32_18 C35_18 109.0(8) . . ?
O1_18 B1_18 O3_18 118.7(8) . . ?
O1_18 B1_18 O2_18 122.8(9) . . ?
O3_18 B1_18 O2_18 118.5(9) . . ?
 
loop_
  _geom_torsion_atom_site_label_1
  _geom_torsion_atom_site_label_2
  _geom_torsion_atom_site_label_3
  _geom_torsion_atom_site_label_4
  _geom_torsion
  _geom_torsion_site_symmetry_1
  _geom_torsion_site_symmetry_2
  _geom_torsion_site_symmetry_3
  _geom_torsion_site_symmetry_4
  _geom_torsion_publ_flag
C11_1 Zr1_1 O1_1 B1_1 159(11) . . . . ?
C11_2 Zr1_2 O1_2 B1_2 169.2(14) . . . . ?
C11_3 Zr1_3 O1_3 B1_3 35(5) . . . . ?
C11_4 Zr1_4 O1_4 B1_4 97.7(9) . . . . ?
C11_5 Zr1_5 O1_5 B1_5 78.2(12) . . . . ?
C11_6 Zr1_6 O1_6 B1_6 138.5(13) . . . . ?
C11_7 Zr1_7 O1_7 B1_7 111.3(9) . . . . ?
C11_8 Zr1_8 O1_8 B1_8 84.5(13) . . . . ?
C11_9 Zr1_9 O1_9 B1_9 79(3) . . . . ?
C11_10 Zr1_10 O1_10 B1_10 107.7(11) . . . . ?
C11_11 Zr1_11 O1_11 B1_11 89.7(12) . . . . ?
C11_12 Zr1_12 O1_12 B1_12 89.7(11) . . . . ?
C11_13 Zr1_13 O1_13 B1_13 179(100) . . . . ?
C11_14 Zr1_14 O1_14 B1_14 86(3) . . . . ?
C11_15 Zr1_15 O1_15 B1_15 127.9(13) . . . . ?
C11_16 Zr1_16 O1_16 B1_16 98.6(10) . . . . ?
C11_17 Zr1_17 O1_17 B1_17 164.6(14) . . . . ?
C11_18 Zr1_18 O1_18 B1_18 148(11) . . . . ?
Zr1_1 O1_1 B1_1 O2_1 -2(11) . . . . ?
Zr1_2 O1_2 B1_2 O2_2 14.9(19) . . . . ?
Zr1_3 O1_3 B1_3 O2_3 147(5) . . . . ?
Zr1_4 O1_4 B1_4 O2_4 93.1(10) . . . . ?
Zr1_5 O1_5 B1_5 O2_5 110.2(11) . . . . ?
Zr1_6 O1_6 B1_6 O2_6 39.6(18) . . . . ?
Zr1_7 O1_7 B1_7 O2_7 95.3(11) . . . . ?
Zr1_8 O1_8 B1_8 O2_8 92.3(14) . . . . ?
Zr1_9 O1_9 B1_9 O2_9 116(3) . . . . ?
Zr1_10 O1_10 B1_10 O2_10 84.9(12) . . . . ?
Zr1_11 O1_11 B1_11 O2_11 103.1(12) . . . . ?
Zr1_12 O1_12 B1_12 O2_12 106.9(10) . . . . ?
Zr1_13 O1_13 B1_13 O2_13 3(3) . . . . ?
Zr1_14 O1_14 B1_14 O2_14 96(3) . . . . ?
Zr1_15 O1_15 B1_15 O2_15 75.7(15) . . . . ?
Zr1_16 O1_16 B1_16 O2_16 95.0(11) . . . . ?
Zr1_17 O1_17 B1_17 O2_17 -19.2(19) . . . . ?
Zr1_18 O1_18 B1_18 O2_18 33(11) . . . . ?
Zr1_1 O1_1 B1_1 O3_1 -178(100) . . . . ?
Zr1_2 O1_2 B1_2 O3_2 -167.2(10) . . . . ?
Zr1_3 O1_3 B1_3 O3_3 -31(6) . . . . ?
Zr1_4 O1_4 B1_4 O3_4 -89.8(10) . . . . ?
Zr1_5 O1_5 B1_5 O3_5 -68.8(14) . . . . ?
Zr1_6 O1_6 B1_6 O3_6 -139.6(10) . . . . ?
Zr1_7 O1_7 B1_7 O3_7 -80.4(12) . . . . ?
Zr1_8 O1_8 B1_8 O3_8 -88.3(14) . . . . ?
Zr1_9 O1_9 B1_9 O3_9 -65(4) . . . . ?
Zr1_10 O1_10 B1_10 O3_10 -95.4(11) . . . . ?
Zr1_11 O1_11 B1_11 O3_11 -77.3(14) . . . . ?
Zr1_12 O1_12 B1_12 O3_12 -69.9(13) . . . . ?
Zr1_13 O1_13 B1_13 O3_13 178.6(14) . . . . ?
Zr1_14 O1_14 B1_14 O3_14 -81(3) . . . . ?
Zr1_15 O1_15 B1_15 O3_15 -105.1(12) . . . . ?
Zr1_16 O1_16 B1_16 O3_16 -88.1(11) . . . . ?
Zr1_17 O1_17 B1_17 O3_17 165.0(10) . . . . ?
Zr1_18 O1_18 B1_18 O3_18 -147(10) . . . . ?
O1_1 B1_1 O2_1 Si1_1 27.0(12) . . . . ?
O1_2 B1_2 O2_2 Si1_2 167.8(5) . . . . ?
O1_3 B1_3 O2_3 Si1_3 19.5(12) . . . . ?
O1_4 B1_4 O2_4 Si1_4 24.0(11) . . . . ?
O1_5 B1_5 O2_5 Si1_5 13.2(10) . . . . ?
O1_6 B1_6 O2_6 Si1_6 52.8(12) . . . . ?
O1_7 B1_7 O2_7 Si1_7 1.4(14) . . . . ?
O1_8 B1_8 O2_8 Si1_8 -45.2(14) . . . . ?
O1_9 B1_9 O2_9 Si1_9 -10.9(18) . . . . ?
O1_10 B1_10 O2_10 Si1_10 25.6(11) . . . . ?
O1_11 B1_11 O2_11 Si1_11 18.5(11) . . . . ?
O1_12 B1_12 O2_12 Si1_12 13.3(10) . . . . ?
O1_13 B1_13 O2_13 Si1_13 -117(3) . . . . ?
O1_14 B1_14 O2_14 Si1_14 17.7(13) . . . . ?
O1_15 B1_15 O2_15 Si1_15 -7.3(15) . . . . ?
O1_16 B1_16 O2_16 Si1_16 23.7(11) . . . . ?
O1_17 B1_17 O2_17 Si1_17 72.6(12) . . . . ?
O1_18 B1_18 O2_18 Si1_18 45(2) . . . . ?
O1_1 B1_1 O3_1 Si2_1 -138.3(7) . . . . ?
O1_2 B1_2 O3_2 Si2_2 13.6(11) . . . . ?
O1_3 B1_3 O3_3 Si2_3 -166.1(6) . . . . ?
O1_4 B1_4 O3_4 Si2_4 145.8(6) . . . . ?
O1_5 B1_5 O3_5 Si2_5 -151.5(5) . . . . ?
O1_6 B1_6 O3_6 Si2_6 -18.4(12) . . . . ?
O1_7 B1_7 O3_7 Si2_7 -25.1(19) . . . . ?
O1_8 B1_8 O3_8 Si2_8 150.1(6) . . . . ?
O1_9 B1_9 O3_9 Si2_9 -152.0(8) . . . . ?
O1_10 B1_10 O3_10 Si2_10 133.9(7) . . . . ?
O1_11 B1_11 O3_11 Si2_11 -175.6(6) . . . . ?
O1_12 B1_12 O3_12 Si2_12 -157.3(5) . . . . ?
O1_13 B1_13 O3_13 Si2_13 20.3(18) . . . . ?
O1_14 B1_14 O3_14 Si2_14 -156.9(6) . . . . ?
O1_15 B1_15 O3_15 Si2_15 -1.5(15) . . . . ?
O1_16 B1_16 O3_16 Si2_16 152.2(7) . . . . ?
O1_17 B1_17 O3_17 Si2_17 -46.4(14) . . . . ?
O1_18 B1_18 O3_18 Si2_18 174.1(9) . . . . ?
B1_1 O2_1 Si1_1 O4_1 162.9(8) . . . . ?
B1_2 O2_2 Si1_2 O4_2 -45.5(8) . . . . ?
B1_3 O2_3 Si1_3 O4_3 172.8(7) . . . . ?
B1_4 O2_4 Si1_4 O4_4 151.4(6) . . . . ?
B1_5 O2_5 Si1_5 O4_5 -70.8(6) . . . . ?
B1_6 O2_6 Si1_6 O4_6 25.9(9) . . . . ?
B1_7 O2_7 Si1_7 O4_7 162.8(8) . . . . ?
B1_8 O2_8 Si1_8 O4_8 171.6(10) . . . . ?
B1_10 O2_10 Si1_10 O4_10 156.0(6) . . . . ?
B1_11 O2_11 Si1_11 O4_11 171.5(6) . . . . ?
B1_12 O2_12 Si1_12 O4_12 166.5(6) . . . . ?
B1_13 O2_13 Si1_13 O4_13 -30(3) . . . . ?
B1_14 O2_14 Si1_14 O4_14 174.7(7) . . . . ?
B1_15 O2_15 Si1_15 O4_15 178.3(10) . . . . ?
B1_16 O2_16 Si1_16 O4_16 153.6(6) . . . . ?
B1_17 O2_17 Si1_17 O4_17 126.5(9) . . . . ?
B1_1 O2_1 Si1_1 O5_1 43.0(8) . . . . ?
B1_2 O2_2 Si1_2 O5_2 -163.4(7) . . . . ?
B1_3 O2_3 Si1_3 O5_3 -63.9(7) . . . . ?
B1_4 O2_4 Si1_4 O5_4 -85.9(7) . . . . ?
B1_5 O2_5 Si1_5 O5_5 47.1(6) . . . . ?
B1_6 O2_6 Si1_6 O5_6 -91.5(8) . . . . ?
B1_7 O2_7 Si1_7 O5_7 -75.1(9) . . . . ?
B1_8 O2_8 Si1_8 O5_8 -61.5(11) . . . . ?
B1_10 O2_10 Si1_10 O5_10 -82.3(7) . . . . ?
B1_11 O2_11 Si1_11 O5_11 -67.3(6) . . . . ?
B1_12 O2_12 Si1_12 O5_12 -71.2(6) . . . . ?
B1_14 O2_14 Si1_14 O5_14 -63.7(8) . . . . ?
B1_15 O2_15 Si1_15 O5_15 -59.5(11) . . . . ?
B1_16 O2_16 Si1_16 O5_16 -83.9(7) . . . . ?
B1_17 O2_17 Si1_17 O5_17 -115.0(9) . . . . ?
B1_1 O2_1 Si1_1 O6_1 -75.0(9) . . . . ?
B1_2 O2_2 Si1_2 O6_2 72.8(8) . . . . ?
B1_3 O2_3 Si1_3 O6_3 52.6(8) . . . . ?
B1_4 O2_4 Si1_4 O6_4 32.6(7) . . . . ?
B1_5 O2_5 Si1_5 O6_5 167.0(6) . . . . ?
B1_6 O2_6 Si1_6 O6_6 147.4(8) . . . . ?
B1_7 O2_7 Si1_7 O6_7 44.0(9) . . . . ?
B1_8 O2_8 Si1_8 O6_8 49.9(11) . . . . ?
B1_10 O2_10 Si1_10 O6_10 35.9(7) . . . . ?
B1_11 O2_11 Si1_11 O6_11 52.4(7) . . . . ?
B1_12 O2_12 Si1_12 O6_12 46.9(7) . . . . ?
B1_13 O2_13 Si1_13 O6_13 -147(3) . . . . ?
B1_14 O2_14 Si1_14 O6_14 54.8(8) . . . . ?
B1_15 O2_15 Si1_15 O6_15 58.2(11) . . . . ?
B1_16 O2_16 Si1_16 O6_16 34.5(7) . . . . ?
B1_17 O2_17 Si1_17 O6_17 3.1(10) . . . . ?
B1_9 O2_9 Si1_9 O4A_9 147.0(12) . . . . ?
B1_18 O2_18 Si1_18 O4A_18 162.5(17) . . . . ?
B1_9 O2_9 Si1_9 O5A_9 28.4(14) . . . . ?
B1_13 O2_13 Si1_13 O5A_13 95(3) . . . . ?
B1_18 O2_18 Si1_18 O5A_18 -87.5(19) . . . . ?
B1_9 O2_9 Si1_9 O6A_9 -94.6(13) . . . . ?
B1_18 O2_18 Si1_18 O6A_18 15(2) . . . . ?
B1_9 O2_9 Si1_9 O4B_9 107.5(14) . . . . ?
B1_18 O2_18 Si1_18 O4B_18 140.1(19) . . . . ?
B1_9 O2_9 Si1_9 O5B_9 -9.4(14) . . . . ?
B1_13 O2_13 Si1_13 O5B_13 87(3) . . . . ?
B1_18 O2_18 Si1_18 O5B_18 -98.8(19) . . . . ?
B1_9 O2_9 Si1_9 O6B_9 -131.4(13) . . . . ?
B1_18 O2_18 Si1_18 O6B_18 43.2(19) . . . . ?
B1_1 O3_1 Si2_1 O7_1 26.1(9) . . . . ?
B1_2 O3_2 Si2_2 O7_2 -177.5(6) . . . . ?
B1_3 O3_3 Si2_3 O7_3 -70.2(9) . . . . ?
B1_4 O3_4 Si2_4 O7_4 -36.2(8) . . . . ?
B1_5 O3_5 Si2_5 O7_5 -72.9(7) . . . . ?
B1_6 O3_6 Si2_6 O7_6 -49.7(8) . . . . ?
B1_7 O3_7 Si2_7 O7_7 177.0(13) . . . . ?
B1_8 O3_8 Si2_8 O7_8 -35.9(8) . . . . ?
B1_9 O3_9 Si2_9 O7_9 74.6(11) . . . . ?
B1_10 O3_10 Si2_10 O7_10 -30.2(9) . . . . ?
B1_12 O3_12 Si2_12 O7_12 -66.5(7) . . . . ?
B1_14 O3_14 Si2_14 O7_14 -73.3(9) . . . . ?
B1_18 O3_18 Si2_18 O7_18 -69.1(13) . . . . ?
B1_1 O3_1 Si2_1 O8_1 -92.0(8) . . . . ?
B1_2 O3_2 Si2_2 O8_2 61.2(7) . . . . ?
B1_3 O3_3 Si2_3 O8_3 50.3(9) . . . . ?
B1_4 O3_4 Si2_4 O8_4 80.9(8) . . . . ?
B1_5 O3_5 Si2_5 O8_5 46.0(7) . . . . ?
B1_6 O3_6 Si2_6 O8_6 -171.1(7) . . . . ?
B1_7 O3_7 Si2_7 O8_7 -63.8(14) . . . . ?
B1_8 O3_8 Si2_8 O8_8 83.1(8) . . . . ?
B1_9 O3_9 Si2_9 O8_9 -43.6(12) . . . . ?
B1_10 O3_10 Si2_10 O8_10 88.2(8) . . . . ?
B1_12 O3_12 Si2_12 O8_12 52.1(7) . . . . ?
B1_14 O3_14 Si2_14 O8_14 45.1(9) . . . . ?
B1_17 O3_17 Si2_17 O8_17 -80.3(11) . . . . ?
B1_18 O3_18 Si2_18 O8_18 47.8(14) . . . . ?
B1_1 O3_1 Si2_1 O9_1 146.8(8) . . . . ?
B1_2 O3_2 Si2_2 O9_2 -58.4(7) . . . . ?
B1_3 O3_3 Si2_3 O9_3 169.6(8) . . . . ?
B1_4 O3_4 Si2_4 O9_4 -160.4(7) . . . . ?
B1_5 O3_5 Si2_5 O9_5 167.4(6) . . . . ?
B1_6 O3_6 Si2_6 O9_6 70.0(8) . . . . ?
B1_7 O3_7 Si2_7 O9_7 57.4(14) . . . . ?
B1_8 O3_8 Si2_8 O9_8 -157.8(8) . . . . ?
B1_9 O3_9 Si2_9 O9_9 -166.9(11) . . . . ?
B1_10 O3_10 Si2_10 O9_10 -152.4(8) . . . . ?
B1_11 O3_11 Si2_11 O9_11 -178.5(8) . . . . ?
B1_12 O3_12 Si2_12 O9_12 173.6(6) . . . . ?
B1_14 O3_14 Si2_14 O9_14 165.3(8) . . . . ?
B1_15 O3_15 Si2_15 O9_15 58.2(11) . . . . ?
B1_16 O3_16 Si2_16 O9_16 -162.0(9) . . . . ?
B1_18 O3_18 Si2_18 O9_18 171.8(12) . . . . ?
B1_11 O3_11 Si2_11 O7A_11 -48.0(10) . . . . ?
B1_13 O3_13 Si2_13 O7A_13 135.1(12) . . . . ?
B1_15 O3_15 Si2_15 O7A_15 157.8(10) . . . . ?
B1_16 O3_16 Si2_16 O7A_16 -47.2(10) . . . . ?
B1_17 O3_17 Si2_17 O7A_17 148.9(11) . . . . ?
B1_11 O3_11 Si2_11 O8A_11 70.6(9) . . . . ?
B1_13 O3_13 Si2_13 O8A_13 -102.1(12) . . . . ?
B1_15 O3_15 Si2_15 O8A_15 -90.6(10) . . . . ?
B1_16 O3_16 Si2_16 O8A_16 71.8(10) . . . . ?
B1_13 O3_13 Si2_13 O9A_13 27.5(13) . . . . ?
B1_17 O3_17 Si2_17 O9A_17 32.7(11) . . . . ?
B1_11 O3_11 Si2_11 O7B_11 -72.0(9) . . . . ?
B1_13 O3_13 Si2_13 O7B_13 -178.0(13) . . . . ?
B1_15 O3_15 Si2_15 O7B_15 -158.5(10) . . . . ?
B1_16 O3_16 Si2_16 O7B_16 -5.9(15) . . . . ?
B1_17 O3_17 Si2_17 O7B_17 171.0(11) . . . . ?
B1_11 O3_11 Si2_11 O8B_11 43.9(10) . . . . ?
B1_13 O3_13 Si2_13 O8B_13 -66.0(14) . . . . ?
B1_15 O3_15 Si2_15 O8B_15 -40.0(11) . . . . ?
B1_16 O3_16 Si2_16 O8B_16 105.3(12) . . . . ?
B1_13 O3_13 Si2_13 O9B_13 58.3(14) . . . . ?
B1_17 O3_17 Si2_17 O9B_17 59.6(13) . . . . ?
 
_diffrn_measured_fraction_theta_max    0.980
_diffrn_reflns_theta_full              23.26
_diffrn_measured_fraction_theta_full   0.980
_refine_diff_density_max    1.134
_refine_diff_density_min   -0.795
_refine_diff_density_rms    0.093

#===END
